# Supplementary material for: TGF-β1 affects the renal cancer miRNome and regulates tumor cells proliferation
Source: PubMed Central journal article supplement — Int J Mol Med. 2022 Feb 17;49(4):52. doi: 10.3892/ijmm.2022.5108 (PMC8904080; doi:10.3892/ijmm.2022.5108), 2022-02-17
Supplement: Supplementary_Data2.pdf [file Supplementary_Data2.pdf]

Table SI. The results of microarray analysis.

| ProbeID | Annotation          | logFC | Fold change | AvgExpr | AvgHy3 | P.Value               |
|---------|---------------------|-------|-------------|---------|--------|-----------------------|
| 42865   | hsa-miR-181a-5p     | 0.61  | 1.53        | 0.01    | 8.02   | 9.43x10 <sup>-5</sup> |
| 28950   | hsa-miR-455-3p      | 0.53  | 1.44        | -0.38   | 5.96   | 2.97x10 <sup>-5</sup> |
| 10952   | hsa-miR-146a-5p     | 0.48  | 1.39        | 0.09    | 6.58   | 1.83x10 <sup>-6</sup> |
| 10972   | hsa-miR-181b-5p     | 0.46  | 1.37        | 0.14    | 7.36   | 3.46x10 <sup>-5</sup> |
| 169408  | hsa-miR-181d-5p     | 0.45  | 1.37        | 0.01    | 7.46   | 2.32x10 <sup>-6</sup> |
| 30787   | hsa-miR-125b-5p     | 0.44  | 1.36        | -0.06   | 7.12   | 1.87x10 <sup>-5</sup> |
| 11020   | hsa-miR-22-3p       | 0.37  | 1.29        | 0.17    | 7.83   | 7.42x10 <sup>-5</sup> |
| 10928   | hsa-miR-125a-5p     | 0.36  | 1.29        | 0.05    | 7.91   | 3.28x10 <sup>-4</sup> |
| 10306   | hsa-miR-146b-5p     | 0.34  | 1.27        | 0.24    | 6.76   | 1.07x10 <sup>-5</sup> |
| 11052   | hsa-miR-31-5p       | 0.34  | 1.26        | -0.18   | 6.07   | 8.20x10 <sup>-5</sup> |
| 42744   | hsa-miR-23a-3p      | 0.27  | 1.21        | 0.06    | 10.20  | 5.38x10 <sup>-3</sup> |
| 169330  | hsa-miR-23b-3p      | 0.25  | 1.19        | 0.19    | 9.62   | 2.78x10 <sup>-2</sup> |
| 147506  | hsa-miR-21-5p       | 0.21  | 1.16        | 0.15    | 10.42  | 6.03x10 <sup>-2</sup> |
| 147776  | hsa-miR-4317        | 0.21  | 1.16        | -0.17   | 7.35   | 6.16x10 <sup>-3</sup> |
| 147751  | hsa-miR-4274        | 0.20  | 1.15        | 0.67    | 6.65   | 1.51x10 <sup>-1</sup> |
| 145889  | hsa-miR-196b-5p     | 0.20  | 1.15        | 0.21    | 6.46   | 5.66x10 <sup>-3</sup> |
| 168870  | hsa-miR-1246        | 0.19  | 1.14        | 0.40    | 10.85  | 2.23x10 <sup>-1</sup> |
| 148682  | hsa-miR-483-3p      | 0.19  | 1.14        | 0.10    | 7.75   | 3.48x10 <sup>-2</sup> |
| 145846  | hsa-let-7e-5p       | 0.19  | 1.14        | 0.18    | 7.59   | 1.93x10 <sup>-2</sup> |
| 17506   | hsa-miR-24-3p       | 0.18  | 1.14        | 0.23    | 9.32   | 1.03x10 <sup>-1</sup> |
| 42532   | hsa-miR-22-5p       | 0.18  | 1.13        | 0.04    | 6.55   | 3.36x10 <sup>-1</sup> |
| 147616  | hsa-miR-4291        | 0.17  | 1.13        | -0.16   | 7.01   | 2.38x10 <sup>-2</sup> |
| 46206   | SNORD44             | 0.16  | 1.12        | 0.28    | 10.07  | 7.32x10 <sup>-2</sup> |
| 17752   | hsa-let-7f-5p       | 0.15  | 1.11        | 0.29    | 7.30   | 1.08x10 <sup>-1</sup> |
| 146008  | hsa-miR-26b-5p      | 0.14  | 1.10        | 0.13    | 7.03   | 1.20x10 <sup>-1</sup> |
| 169376  | hsa-miR-5701        | 0.14  | 1.10        | 0.13    | 10.47  | 6.40x10 <sup>-2</sup> |
| 46416   | hsa-miR-1293        | 0.13  | 1.09        | 0.61    | 6.12   | 1.60x10 <sup>-1</sup> |
| 146058  | hsv1-miR-H3-3p      | 0.13  | 1.09        | 1.28    | 6.67   | 8.22x10 <sup>-2</sup> |
| 146090  | hsv1-miR-H7-3p      | 0.13  | 1.09        | -0.06   | 6.39   | 2.38x10 <sup>-1</sup> |
| 168568  | hsa-miR-1290        | 0.12  | 1.09        | -0.22   | 7.03   | 5.45x10 <sup>-1</sup> |
| 168661  | hsa-miR-4531        | 0.12  | 1.09        | -0.43   | 6.49   | 3.83x10 <sup>-1</sup> |
| 145647  | hsa-miR-584-5p      | 0.12  | 1.09        | 0.36    | 6.05   | 1.09x10 <sup>-1</sup> |
| 169129  | hsa-miR-4284        | 0.12  | 1.09        | 0.26    | 13.24  | 2.24x10 <sup>-1</sup> |
| 46788   | hsa-miR-1299        | 0.11  | 1.08        | 0.23    | 6.43   | 8.17x10 <sup>-2</sup> |
| 46624   | hsa-miR-1236-3p     | 0.11  | 1.08        | 0.53    | 6.29   | 5.64x10 <sup>-2</sup> |
| 19007   | SNORD3@             | 0.11  | 1.08        | 0.11    | 11.16  | 2.64x10 <sup>-1</sup> |
| 42502   | hsa-miR-204-3p      | 0.11  | 1.08        | -0.03   | 7.05   | 2.13x10 <sup>-1</sup> |
| 46483   | hsa-miR-27a-3p      | 0.11  | 1.08        | -0.10   | 7.08   | 1.41x10 <sup>-1</sup> |
| 46204   | SNORD38B            | 0.11  | 1.08        | 0.20    | 9.04   | 3.45x10 <sup>-1</sup> |
| 42656   | kshv-miR-K12-10a-3p | 0.10  | 1.07        | 1.06    | 6.81   | 1.23x10 <sup>-1</sup> |
| 169082  | hsa-miR-1275        | 0.10  | 1.07        | -0.04   | 7.15   | 3.13x10 <sup>-1</sup> |
| 145973  | hsa-miR-664a-3p     | 0.10  | 1.07        | 0.32    | 7.23   | 1.36x10 <sup>-1</sup> |

|        |                   |      |      |       |       |                       |
|--------|-------------------|------|------|-------|-------|-----------------------|
| 27551  | hsa-miR-612       | 0.09 | 1.07 | 0.04  | 6.08  | 1.50x10 <sup>-1</sup> |
| 168802 | hsa-miR-4516      | 0.09 | 1.07 | -0.04 | 6.58  | 6.03x10 <sup>-1</sup> |
| 46443  | hsa-miR-193a-5p   | 0.09 | 1.06 | 0.41  | 6.28  | 4.27x10 <sup>-1</sup> |
| 46368  | hsa-miR-1282      | 0.09 | 1.06 | 0.73  | 6.13  | 2.12x10 <sup>-1</sup> |
| 17882  | hsa-miR-20b-3p    | 0.08 | 1.06 | -0.01 | 6.88  | 2.54x10 <sup>-1</sup> |
| 42570  | hsa-miR-194-3p    | 0.08 | 1.06 | 0.18  | 7.23  | 1.87x10 <sup>-1</sup> |
| 42522  | ebv-miR-BART19-3p | 0.08 | 1.06 | 0.59  | 6.85  | 2.32x10 <sup>-1</sup> |
| 147162 | hsa-let-7a-5p     | 0.08 | 1.06 | 0.30  | 9.09  | 4.18x10 <sup>-1</sup> |
| 11260  | hsa-miR-151a-5p   | 0.08 | 1.06 | -0.08 | 6.58  | 1.76x10 <sup>-1</sup> |
| 145838 | hsa-miR-125b-1-3p | 0.08 | 1.06 | 1.43  | 7.18  | 2.48x10 <sup>-1</sup> |
| 29490  | hsa-miR-7-5p      | 0.08 | 1.05 | 0.27  | 6.29  | 2.91x10 <sup>-1</sup> |
| 17810  | hsa-miR-29b-1-5p  | 0.08 | 1.05 | 0.34  | 6.07  | 1.96x10 <sup>-1</sup> |
| 169182 | hsa-miR-4728-3p   | 0.08 | 1.05 | -0.09 | 6.50  | 4.35x10 <sup>-1</sup> |
| 169326 | hsa-miR-451b      | 0.07 | 1.05 | -0.09 | 7.88  | 6.03x10 <sup>-1</sup> |
| 169271 | hsa-miR-4784      | 0.07 | 1.05 | -0.18 | 6.06  | 1.77x10 <sup>-1</sup> |
| 42504  | hsa-miR-593-3p    | 0.07 | 1.05 | 0.76  | 6.19  | 4.89x10 <sup>-1</sup> |
| 169056 | hsa-miR-4669      | 0.07 | 1.05 | -0.20 | 6.21  | 3.39x10 <sup>-1</sup> |
| 145843 | hsa-miR-330-5p    | 0.07 | 1.05 | 0.96  | 6.35  | 3.20x10 <sup>-1</sup> |
| 19605  | SNORD6            | 0.07 | 1.05 | -0.17 | 9.55  | 3.94x10 <sup>-1</sup> |
| 17463  | hsa-miR-151a-3p   | 0.07 | 1.05 | 0.03  | 6.16  | 2.75x10 <sup>-1</sup> |
| 146064 | hsa-miR-718       | 0.07 | 1.05 | 1.23  | 6.84  | 3.57x10 <sup>-1</sup> |
| 10936  | hsa-miR-130b-3p   | 0.07 | 1.05 | 0.26  | 6.73  | 2.33x10 <sup>-1</sup> |
| 148214 | hsa-miR-3675-3p   | 0.07 | 1.05 | 0.14  | 6.62  | 3.27x10 <sup>-1</sup> |
| 10990  | hsa-miR-196a-5p   | 0.07 | 1.05 | 0.45  | 6.94  | 3.29x10 <sup>-1</sup> |
| 169244 | hsa-miR-5572      | 0.06 | 1.04 | 0.36  | 5.90  | 6.26x10 <sup>-1</sup> |
| 46205  | SNORD48           | 0.06 | 1.04 | -0.05 | 8.92  | 4.14x10 <sup>-1</sup> |
| 168887 | hsa-miR-5089-5p   | 0.06 | 1.04 | -0.17 | 7.70  | 3.01x10 <sup>-1</sup> |
| 11184  | hsa-miR-99b-5p    | 0.06 | 1.04 | -0.52 | 6.10  | 5.94x10 <sup>-1</sup> |
| 11182  | hsa-miR-98-5p     | 0.06 | 1.04 | 0.15  | 8.31  | 4.82x10 <sup>-1</sup> |
| 46731  | hsa-miR-4657      | 0.06 | 1.04 | 0.10  | 11.22 | 4.84x10 <sup>-1</sup> |
| 169199 | hsa-miR-4518      | 0.05 | 1.04 | -0.28 | 6.09  | 3.82x10 <sup>-1</sup> |
| 17858  | hsa-miRPlus-A1073 | 0.05 | 1.04 | 1.22  | 6.95  | 4.34x10 <sup>-1</sup> |
| 148038 | hsa-miR-3679-3p   | 0.05 | 1.04 | 0.85  | 7.10  | 3.70x10 <sup>-1</sup> |
| 42749  | hsa-miR-659-3p    | 0.05 | 1.04 | 0.38  | 6.04  | 4.71x10 <sup>-1</sup> |
| 146042 | hsv1-miR-H8-3p    | 0.05 | 1.03 | 0.31  | 6.26  | 3.67x10 <sup>-1</sup> |
| 147631 | hsa-miR-4258      | 0.05 | 1.03 | 0.23  | 6.20  | 5.30x10 <sup>-1</sup> |
| 169323 | hsa-miR-4723-3p   | 0.05 | 1.03 | 0.80  | 6.65  | 3.52x10 <sup>-1</sup> |
| 46556  | hsa-miR-623       | 0.05 | 1.03 | 0.74  | 6.14  | 4.32x10 <sup>-1</sup> |
| 10967  | hsa-miR-16-5p     | 0.05 | 1.03 | 0.40  | 8.29  | 5.87x10 <sup>-1</sup> |
| 169083 | hsa-miR-371b-3p   | 0.04 | 1.03 | 0.25  | 6.51  | 4.21x10 <sup>-1</sup> |
| 27740  | hsa-miR-574-5p    | 0.04 | 1.03 | 0.57  | 7.29  | 6.34x10 <sup>-1</sup> |
| 148059 | hsa-miR-493-5p    | 0.04 | 1.03 | -0.20 | 8.19  | 5.77x10 <sup>-1</sup> |
| 147614 | hsa-miR-4299      | 0.04 | 1.03 | -0.10 | 6.62  | 5.57x10 <sup>-1</sup> |
| 145753 | hsa-miR-484       | 0.04 | 1.03 | 0.23  | 6.21  | 4.06x10 <sup>-1</sup> |

|        |                                   |      |      |       |       |                       |
|--------|-----------------------------------|------|------|-------|-------|-----------------------|
| 168963 | hsa-miR-664b-5p                   | 0.04 | 1.03 | 0.10  | 6.47  | 5.56x10 <sup>-1</sup> |
| 14272  | hsa-miR-542-3p                    | 0.04 | 1.03 | -0.06 | 6.20  | 5.20x10 <sup>-1</sup> |
| 147906 | hsa-miR-4322                      | 0.04 | 1.03 | -0.35 | 5.79  | 8.44x10 <sup>-1</sup> |
| 46210  | hsa-miR-1249                      | 0.04 | 1.03 | 0.83  | 6.65  | 5.52x10 <sup>-1</sup> |
| 147755 | hsa-miR-378c                      | 0.04 | 1.03 | 0.91  | 6.22  | 6.98x10 <sup>-1</sup> |
| 42696  | hsa-miR-943                       | 0.04 | 1.03 | 1.09  | 7.05  | 6.09x10 <sup>-1</sup> |
| 168672 | hsa-miR-1587                      | 0.04 | 1.02 | 0.33  | 6.47  | 5.37x10 <sup>-1</sup> |
| 147864 | hsv2-miR-H24                      | 0.03 | 1.02 | 0.19  | 6.10  | 5.29x10 <sup>-1</sup> |
| 169034 | hsa-miR-642b-5p                   | 0.03 | 1.02 | 0.29  | 7.86  | 6.29x10 <sup>-1</sup> |
| 147722 | hsa-miR-4306                      | 0.03 | 1.02 | -0.17 | 6.96  | 5.79x10 <sup>-1</sup> |
| 147907 | hsa-miR-4312                      | 0.03 | 1.02 | 0.48  | 6.43  | 6.57x10 <sup>-1</sup> |
| 42793  | hsa-miRPlus-A1072                 | 0.03 | 1.02 | -0.38 | 6.66  | 8.84x10 <sup>-1</sup> |
| 19606  | SNORD12                           | 0.03 | 1.02 | 0.08  | 6.89  | 5.07x10 <sup>-1</sup> |
| 19013  | SNORD14B                          | 0.03 | 1.02 | -0.02 | 6.55  | 5.46x10 <sup>-1</sup> |
| 42538  | hsa-miR-196a-3p                   | 0.03 | 1.02 | -0.31 | 6.49  | 6.42x10 <sup>-1</sup> |
| 145845 | hsa-miR-20a-5p                    | 0.03 | 1.02 | 0.16  | 7.48  | 6.57x10 <sup>-1</sup> |
| 168995 | hsa-miR-4791                      | 0.03 | 1.02 | -0.01 | 8.78  | 7.47x10 <sup>-1</sup> |
| 146072 | hsa-miR-1469                      | 0.03 | 1.02 | -0.35 | 6.05  | 7.60x10 <sup>-1</sup> |
| 168864 | hsa-miR-320d                      | 0.03 | 1.02 | 0.11  | 6.28  | 6.47x10 <sup>-1</sup> |
| 169239 | hsa-miR-4732-5p                   | 0.03 | 1.02 | -0.21 | 6.35  | 8.64x10 <sup>-1</sup> |
| 169159 | hsa-miR-4521                      | 0.03 | 1.02 | -0.20 | 7.04  | 6.82x10 <sup>-1</sup> |
| 148049 | hsa-miR-3924                      | 0.03 | 1.02 | -0.04 | 6.55  | 6.82x10 <sup>-1</sup> |
| 168687 | hsa-miR-29a-3p                    | 0.02 | 1.02 | -0.09 | 7.24  | 7.10x10 <sup>-1</sup> |
| 145675 | hsa-miR-501-5p                    | 0.02 | 1.02 | 0.32  | 6.07  | 7.30x10 <sup>-1</sup> |
| 4040   | hsa-miR-9-5p                      | 0.02 | 1.02 | 0.72  | 6.35  | 6.89x10 <sup>-1</sup> |
| 42897  | ebv-miR-BART15                    | 0.02 | 1.02 | 0.65  | 6.04  | 7.57x10 <sup>-1</sup> |
| 145701 | hsa-miR-668-3p                    | 0.02 | 1.01 | 0.14  | 7.22  | 7.95x10 <sup>-1</sup> |
| 148377 | hsa-miR-3653                      | 0.02 | 1.01 | 0.04  | 6.97  | 8.10x10 <sup>-1</sup> |
| 145789 | hsa-miR-550a-3-5p/hsa-miR-550a-5p | 0.02 | 1.01 | 0.05  | 6.79  | 7.17x10 <sup>-1</sup> |
| 10923  | hsa-miR-107                       | 0.02 | 1.01 | -0.10 | 6.87  | 7.67x10 <sup>-1</sup> |
| 168798 | hsa-miR-4668-5p                   | 0.02 | 1.01 | 0.05  | 13.20 | 8.92x10 <sup>-1</sup> |
| 169009 | hsa-miR-548ap-5p/hsa-miR-548j-5p  | 0.02 | 1.01 | -0.39 | 7.80  | 7.83x10 <sup>-1</sup> |
| 10975  | hsa-miR-182-5p                    | 0.02 | 1.01 | -0.26 | 6.33  | 8.05x10 <sup>-1</sup> |
| 147667 | hsa-miR-3182                      | 0.02 | 1.01 | 0.20  | 10.62 | 8.01x10 <sup>-1</sup> |
| 168994 | hsa-miR-3591-5p                   | 0.02 | 1.01 | -0.13 | 6.63  | 7.87x10 <sup>-1</sup> |
| 147900 | hsv2-miR-H6-3p                    | 0.02 | 1.01 | -0.05 | 7.07  | 7.49x10 <sup>-1</sup> |
| 147891 | hsa-miR-3175                      | 0.01 | 1.01 | -0.03 | 9.93  | 8.66x10 <sup>-1</sup> |
| 46438  | hsa-let-7g-5p                     | 0.01 | 1.01 | 0.04  | 8.10  | 8.72x10 <sup>-1</sup> |
| 148285 | hsa-miR-3941                      | 0.01 | 1.01 | -0.17 | 6.45  | 8.03x10 <sup>-1</sup> |
| 42581  | hsa-miR-513a-5p                   | 0.01 | 1.01 | 0.06  | 7.62  | 8.54x10 <sup>-1</sup> |
| 169171 | hsa-miR-4436b-5p                  | 0.01 | 1.01 | 0.08  | 6.76  | 8.64x10 <sup>-1</sup> |
| 169380 | hsa-miR-3124-3p                   | 0.01 | 1.01 | 0.00  | 8.11  | 8.98x10 <sup>-1</sup> |
| 42750  | hsa-miR-636                       | 0.01 | 1.01 | 0.02  | 6.62  | 8.72x10 <sup>-1</sup> |
| 10919  | hsa-miR-103a-3p                   | 0.01 | 1.01 | 0.05  | 7.83  | 8.95x10 <sup>-1</sup> |

|        |                   |       |      |       |       |                       |
|--------|-------------------|-------|------|-------|-------|-----------------------|
| 168989 | hsa-miR-4447      | 0.01  | 1.01 | 0.34  | 6.01  | 9.30x10 <sup>-1</sup> |
| 147165 | hsa-let-7b-5p     | 0.01  | 1.01 | 0.33  | 10.52 | 9.29x10 <sup>-1</sup> |
| 19005  | SNORD118          | 0.01  | 1.01 | 0.05  | 7.18  | 8.91x10 <sup>-1</sup> |
| 168768 | hsa-miR-4423-5p   | 0.01  | 1.01 | -0.24 | 6.51  | 8.80x10 <sup>-1</sup> |
| 11045  | hsa-miR-302c-5p   | 0.01  | 1.01 | -0.32 | 6.58  | 9.29x10 <sup>-1</sup> |
| 148622 | hsa-miR-877-3p    | 0.01  | 1.00 | 0.43  | 6.65  | 9.01x10 <sup>-1</sup> |
| 168586 | hsa-miR-34a-5p    | 0.01  | 1.00 | 0.01  | 7.12  | 9.33x10 <sup>-1</sup> |
| 169023 | hsa-miR-4712-3p   | 0.01  | 1.00 | -0.28 | 6.99  | 9.12x10 <sup>-1</sup> |
| 19011  | SNORD10           | 0.01  | 1.00 | 0.06  | 8.89  | 9.14x10 <sup>-1</sup> |
| 18739  | hsa-miR-186-5p    | 0.01  | 1.00 | 0.13  | 6.06  | 9.21x10 <sup>-1</sup> |
| 145968 | hsa-let-7d-5p     | 0.01  | 1.00 | 0.08  | 8.44  | 9.40x10 <sup>-1</sup> |
| 147203 | hsa-miR-302a-3p   | 0.01  | 1.00 | 0.08  | 6.89  | 9.37x10 <sup>-1</sup> |
| 169282 | hsa-miR-4290      | 0.01  | 1.00 | 0.25  | 7.65  | 9.45x10 <sup>-1</sup> |
| 27544  | hsa-miR-363-5p    | 0.00  | 1.00 | -0.03 | 6.99  | 9.35x10 <sup>-1</sup> |
| 169079 | hsa-miR-4667-5p   | 0.00  | 1.00 | -0.03 | 7.08  | 9.49x10 <sup>-1</sup> |
| 27533  | hsa-miR-320a      | 0.00  | 1.00 | 0.19  | 7.11  | 9.43x10 <sup>-1</sup> |
| 146005 | hsa-miR-3129-5p   | 0.00  | 1.00 | 0.99  | 6.38  | 9.52x10 <sup>-1</sup> |
| 148495 | hsa-miR-3915      | 0.00  | 1.00 | -0.31 | 7.08  | 9.52x10 <sup>-1</sup> |
| 17488  | kshv-miR-K12-6-3p | 0.00  | 1.00 | 0.08  | 6.25  | 9.80x10 <sup>-1</sup> |
| 147975 | hsa-miR-487a-5p   | 0.00  | 1.00 | 0.35  | 6.33  | 9.59x10 <sup>-1</sup> |
| 147806 | hsa-miR-3149      | 0.00  | 1.00 | 0.30  | 6.84  | 9.61x10 <sup>-1</sup> |
| 46789  | hsa-miR-513b-5p   | 0.00  | 1.00 | 0.34  | 6.35  | 9.74x10 <sup>-1</sup> |
| 19008  | SNORD2            | 0.00  | 1.00 | 0.19  | 9.27  | 9.82x10 <sup>-1</sup> |
| 146103 | hsa-miR-1913      | 0.00  | 1.00 | 0.19  | 6.54  | 9.78x10 <sup>-1</sup> |
| 169170 | hsa-miR-4472      | 0.00  | 1.00 | 0.61  | 6.38  | 9.87x10 <sup>-1</sup> |
| 147804 | hsv1-miR-H17      | 0.00  | 1.00 | -0.20 | 6.68  | 9.87x10 <sup>-1</sup> |
| 10985  | hsa-miR-191-5p    | 0.00  | 1.00 | 0.19  | 7.05  | 9.93x10 <sup>-1</sup> |
| 168964 | hsa-miR-4450      | 0.00  | 1.00 | 0.02  | 6.03  | 9.92x10 <sup>-1</sup> |
| 168805 | hsa-miR-4478      | 0.00  | 1.00 | -0.32 | 6.34  | 9.94x10 <sup>-1</sup> |
| 14301  | hsa-miR-361-5p    | 0.00  | 1.00 | 0.31  | 6.83  | 9.96x10 <sup>-1</sup> |
| 148379 | hsa-miR-3654      | 0.00  | 1.00 | -0.08 | 9.13  | 9.97x10 <sup>-1</sup> |
| 28302  | hsa-miRPlus-A1015 | 0.00  | 1.00 | 0.30  | 10.13 | 9.99x10 <sup>-1</sup> |
| 147632 | hsa-miR-4297      | 0.00  | 1.00 | 0.13  | 6.30  | 1.00x10+0             |
| 169137 | hsa-miR-4524b-5p  | 0.00  | 1.00 | -0.61 | 7.56  | 9.87x10 <sup>-1</sup> |
| 169385 | hsa-miR-4500      | 0.00  | 1.00 | 0.14  | 8.55  | 9.88x10 <sup>-1</sup> |
| 42446  | hsa-miR-576-5p    | 0.00  | 1.00 | -0.08 | 6.03  | 9.55x10 <sup>-1</sup> |
| 46203  | SNORD49A          | 0.00  | 1.00 | 0.12  | 7.74  | 9.70x10 <sup>-1</sup> |
| 146111 | hsa-miR-767-5p    | 0.00  | 1.00 | -0.15 | 8.62  | 9.54x10 <sup>-1</sup> |
| 168674 | hsa-miR-4716-5p   | -0.01 | 1.00 | 0.24  | 6.56  | 9.34x10 <sup>-1</sup> |
| 17302  | hsa-miR-578       | -0.01 | 1.00 | 0.67  | 6.07  | 9.33x10 <sup>-1</sup> |
| 42490  | hsa-miR-505-5p    | -0.01 | 1.00 | 0.46  | 6.20  | 9.16x10 <sup>-1</sup> |
| 42492  | hsa-miRPlus-A1031 | -0.01 | 1.00 | 0.70  | 6.09  | 9.23x10 <sup>-1</sup> |
| 168708 | hsa-miR-296-5p    | -0.01 | 1.00 | 0.39  | 6.07  | 8.92x10 <sup>-1</sup> |
| 169363 | hsa-miR-320c      | -0.01 | 1.00 | 0.12  | 6.93  | 9.08x10 <sup>-1</sup> |
| 42514  | hsa-miR-937-3p    | -0.01 | 1.00 | -0.46 | 6.42  | 9.15x10 <sup>-1</sup> |

|        |                              |       |      |       |       |                       |
|--------|------------------------------|-------|------|-------|-------|-----------------------|
| 19585  | hsa-miR-148b-3p              | -0.01 | 0.99 | 0.21  | 6.19  | 8.87x10 <sup>-1</sup> |
| 42442  | hsa-miR-498                  | -0.01 | 0.99 | 0.11  | 6.74  | 9.01x10 <sup>-1</sup> |
| 147767 | hsa-miR-4279                 | -0.01 | 0.99 | 0.03  | 7.71  | 9.23x10 <sup>-1</sup> |
| 27565  | hsa-miR-423-5p               | -0.01 | 0.99 | -0.04 | 7.05  | 8.58x10 <sup>-1</sup> |
| 148247 | hsa-miR-2355-3p              | -0.01 | 0.99 | 0.04  | 6.51  | 8.65x10 <sup>-1</sup> |
| 30687  | hsa-miR-93-5p                | -0.01 | 0.99 | 0.23  | 7.28  | 8.40x10 <sup>-1</sup> |
| 147930 | hsa-miR-3144-3p              | -0.01 | 0.99 | 0.20  | 6.18  | 8.33x10 <sup>-1</sup> |
| 169311 | hsa-miR-4714-5p              | -0.01 | 0.99 | -0.32 | 10.51 | 8.51x10 <sup>-1</sup> |
| 148481 | hsa-miR-3646                 | -0.01 | 0.99 | 0.18  | 9.01  | 8.87x10 <sup>-1</sup> |
| 168769 | hsa-miR-5002-5p              | -0.01 | 0.99 | -0.04 | 7.34  | 8.81x10 <sup>-1</sup> |
| 147923 | hsa-miR-3142                 | -0.01 | 0.99 | -0.44 | 7.05  | 8.61x10 <sup>-1</sup> |
| 168871 | hsa-miR-151a-5p/hsa-miR-151b | -0.01 | 0.99 | -0.11 | 7.01  | 8.04x10 <sup>-1</sup> |
| 29575  | hsa-miR-32-3p                | -0.01 | 0.99 | 0.25  | 7.58  | 7.72x10 <sup>-1</sup> |
| 169313 | hsa-miR-4800-3p              | -0.02 | 0.99 | 0.27  | 8.26  | 9.09x10 <sup>-1</sup> |
| 148156 | hsa-miR-3686                 | -0.02 | 0.99 | 0.05  | 7.81  | 8.46x10 <sup>-1</sup> |
| 168776 | hsa-miR-4795-3p              | -0.02 | 0.99 | -0.41 | 6.45  | 8.25x10 <sup>-1</sup> |
| 169272 | hsa-miR-4419b                | -0.02 | 0.99 | -0.05 | 8.94  | 7.92x10 <sup>-1</sup> |
| 169393 | hsa-miR-4747-5p              | -0.02 | 0.99 | -0.04 | 6.68  | 8.04x10 <sup>-1</sup> |
| 17306  | ebv-miR-BART12               | -0.02 | 0.99 | 0.82  | 6.18  | 7.79x10 <sup>-1</sup> |
| 147790 | hsv2-miR-H7-3p               | -0.02 | 0.99 | -0.04 | 6.08  | 7.78x10 <sup>-1</sup> |
| 10946  | hsa-miR-141-3p               | -0.02 | 0.99 | 0.11  | 6.49  | 7.49x10 <sup>-1</sup> |
| 168640 | hsa-miR-4475                 | -0.02 | 0.98 | -0.38 | 6.92  | 8.19x10 <sup>-1</sup> |
| 46810  | hsa-miR-1827                 | -0.02 | 0.98 | 0.00  | 7.13  | 8.02x10 <sup>-1</sup> |
| 147604 | hsa-miR-4285                 | -0.02 | 0.98 | -0.31 | 6.14  | 6.81x10 <sup>-1</sup> |
| 147415 | hsa-miR-495-5p               | -0.02 | 0.98 | -0.15 | 6.15  | 6.23x10 <sup>-1</sup> |
| 148420 | hsa-miR-3607-3p              | -0.03 | 0.98 | -0.14 | 7.62  | 6.89x10 <sup>-1</sup> |
| 10925  | hsa-miR-10b-5p               | -0.03 | 0.98 | 0.10  | 6.36  | 6.72x10 <sup>-1</sup> |
| 17898  | hsa-miR-99b-3p               | -0.03 | 0.98 | 0.27  | 6.59  | 6.86x10 <sup>-1</sup> |
| 17280  | hsa-miR-15b-5p               | -0.03 | 0.98 | 0.21  | 8.46  | 7.63x10 <sup>-1</sup> |
| 17492  | sv40-miR-S1-5p               | -0.03 | 0.98 | 0.06  | 6.86  | 6.94x10 <sup>-1</sup> |
| 28966  | hsa-miR-574-3p               | -0.03 | 0.98 | -0.14 | 6.75  | 6.67x10 <sup>-1</sup> |
| 169305 | hsa-miR-4455                 | -0.03 | 0.98 | 0.18  | 7.50  | 6.64x10 <sup>-1</sup> |
| 169407 | hsa-miR-4301                 | -0.03 | 0.98 | 0.29  | 12.28 | 7.27x10 <sup>-1</sup> |
| 169183 | hsa-miR-4644                 | -0.03 | 0.98 | -0.24 | 6.50  | 8.20x10 <sup>-1</sup> |
| 148687 | hsa-miR-1908-5p              | -0.03 | 0.98 | 0.08  | 6.60  | 6.73x10 <sup>-1</sup> |
| 169015 | hsa-miR-4454                 | -0.03 | 0.98 | 0.45  | 14.31 | 7.63x10 <sup>-1</sup> |
| 17377  | hsa-miR-600                  | -0.03 | 0.98 | -0.19 | 6.76  | 7.05x10 <sup>-1</sup> |
| 169336 | hsa-miR-17-5p                | -0.03 | 0.98 | -0.13 | 7.26  | 5.85x10 <sup>-1</sup> |
| 169375 | hsa-miR-660-3p               | -0.03 | 0.98 | -0.03 | 7.59  | 5.89x10 <sup>-1</sup> |
| 168925 | hsa-miR-1273g-3p             | -0.03 | 0.98 | 0.34  | 11.06 | 7.06x10 <sup>-1</sup> |
| 169028 | hsa-miR-4708-3p              | -0.03 | 0.98 | 0.10  | 8.23  | 7.72x10 <sup>-1</sup> |
| 46324  | hsa-miR-320b                 | -0.03 | 0.98 | 0.00  | 7.09  | 5.57x10 <sup>-1</sup> |
| 169145 | hsa-miR-5000-3p              | -0.04 | 0.98 | -0.14 | 6.87  | 6.29x10 <sup>-1</sup> |
| 42624  | kshv-miR-K12-10b             | -0.04 | 0.98 | 0.96  | 6.71  | 5.24x10 <sup>-1</sup> |

|        |                   |       |      |       |       |                       |
|--------|-------------------|-------|------|-------|-------|-----------------------|
| 169274 | hsa-miR-5196-3p   | -0.04 | 0.98 | -0.46 | 6.54  | 5.64x10 <sup>-1</sup> |
| 42591  | hsa-miR-634       | -0.04 | 0.97 | -0.09 | 7.47  | 4.81x10 <sup>-1</sup> |
| 29872  | hsa-miR-340-5p    | -0.04 | 0.97 | -0.06 | 7.35  | 5.89x10 <sup>-1</sup> |
| 19603  | SNORD13           | -0.04 | 0.97 | 0.24  | 9.06  | 6.13x10 <sup>-1</sup> |
| 42730  | hsa-miR-423-3p    | -0.04 | 0.97 | -0.20 | 6.69  | 6.21x10 <sup>-1</sup> |
| 169381 | hsa-miR-4421      | -0.04 | 0.97 | -0.06 | 7.04  | 6.56x10 <sup>-1</sup> |
| 148418 | hsa-miR-3607-5p   | -0.04 | 0.97 | -0.11 | 6.42  | 4.58x10 <sup>-1</sup> |
| 148599 | hsa-miR-3680-5p   | -0.04 | 0.97 | -0.08 | 6.78  | 6.25x10 <sup>-1</sup> |
| 10138  | hsa-miR-130a-3p   | -0.04 | 0.97 | 0.15  | 6.63  | 4.85x10 <sup>-1</sup> |
| 169050 | hsa-miR-4787-5p   | -0.04 | 0.97 | 0.04  | 8.77  | 7.01x10 <sup>-1</sup> |
| 42640  | hsa-miR-20b-5p    | -0.04 | 0.97 | -0.22 | 6.45  | 4.47x10 <sup>-1</sup> |
| 169167 | hsa-miR-4451      | -0.04 | 0.97 | -0.39 | 7.33  | 4.37x10 <sup>-1</sup> |
| 169211 | hsa-miR-5704      | -0.04 | 0.97 | -0.54 | 8.64  | 4.53x10 <sup>-1</sup> |
| 27720  | hsa-miR-15a-5p    | -0.04 | 0.97 | 0.41  | 7.23  | 5.60x10 <sup>-1</sup> |
| 146117 | hsv1-miR-H6-3p    | -0.04 | 0.97 | 0.07  | 7.48  | 7.23x10 <sup>-1</sup> |
| 168935 | hsa-miR-4687-3p   | -0.04 | 0.97 | 0.09  | 6.15  | 5.30x10 <sup>-1</sup> |
| 148465 | hsa-miR-3611      | -0.04 | 0.97 | -0.36 | 6.27  | 5.19x10 <sup>-1</sup> |
| 146098 | hsv1-miR-H5-3p    | -0.05 | 0.97 | -0.55 | 6.42  | 4.58x10 <sup>-1</sup> |
| 19604  | SNORD4A           | -0.05 | 0.97 | 0.03  | 8.27  | 4.64x10 <sup>-1</sup> |
| 19596  | hsa-miR-30d-5p    | -0.05 | 0.97 | -0.02 | 6.34  | 3.93x10 <sup>-1</sup> |
| 46380  | hsa-miR-1255a     | -0.05 | 0.97 | -0.18 | 7.35  | 3.84x10 <sup>-1</sup> |
| 27537  | ebv-miR-BART13-3p | -0.05 | 0.97 | -0.21 | 6.54  | 5.70x10 <sup>-1</sup> |
| 145666 | SNORD110          | -0.05 | 0.97 | 0.00  | 8.11  | 3.50x10 <sup>-1</sup> |
| 148261 | hsa-miR-208a-5p   | -0.05 | 0.96 | 0.05  | 6.48  | 4.59x10 <sup>-1</sup> |
| 168915 | hsa-miR-4780      | -0.05 | 0.96 | -0.08 | 7.37  | 3.82x10 <sup>-1</sup> |
| 148085 | hsa-miR-3687      | -0.06 | 0.96 | -0.11 | 5.96  | 3.86x10 <sup>-1</sup> |
| 147735 | hsa-miR-4289      | -0.06 | 0.96 | -0.23 | 6.17  | 5.93x10 <sup>-1</sup> |
| 168637 | hsa-miR-3940-5p   | -0.06 | 0.96 | -0.08 | 7.69  | 6.74x10 <sup>-1</sup> |
| 169316 | hsa-miR-3976      | -0.06 | 0.96 | -0.14 | 7.91  | 5.48x10 <sup>-1</sup> |
| 42965  | hsa-miR-424-5p    | -0.06 | 0.96 | 0.15  | 6.47  | 3.91x10 <sup>-1</sup> |
| 148317 | hsa-miR-3621      | -0.06 | 0.96 | 0.17  | 6.16  | 3.64x10 <sup>-1</sup> |
| 169169 | hsa-miR-5684      | -0.06 | 0.96 | 0.12  | 11.48 | 4.97x10 <sup>-1</sup> |
| 46345  | hsa-miR-1207-3p   | -0.06 | 0.96 | 0.98  | 6.50  | 4.15x10 <sup>-1</sup> |
| 148234 | hsa-miR-3667-5p   | -0.06 | 0.96 | -0.40 | 7.16  | 4.43x10 <sup>-1</sup> |
| 145663 | SNORD68           | -0.06 | 0.96 | 0.49  | 10.31 | 5.12x10 <sup>-1</sup> |
| 147885 | kshv-miR-K12-5-5p | -0.06 | 0.96 | -0.21 | 7.28  | 4.38x10 <sup>-1</sup> |
| 17854  | hsa-miR-106b-3p   | -0.06 | 0.96 | 0.26  | 6.37  | 2.44x10 <sup>-1</sup> |
| 146159 | hsv1-miR-H4-3p    | -0.06 | 0.96 | -0.16 | 10.66 | 6.26x10 <sup>-1</sup> |
| 168869 | hsa-miR-5010-3p   | -0.06 | 0.96 | 0.14  | 6.05  | 2.09x10 <sup>-1</sup> |
| 148265 | hsa-miR-3935      | -0.06 | 0.96 | -0.50 | 6.18  | 4.53x10 <sup>-1</sup> |
| 30033  | hsa-miR-877-5p    | -0.06 | 0.96 | 0.49  | 6.26  | 3.42x10 <sup>-1</sup> |
| 169285 | hsa-miR-4467      | -0.06 | 0.96 | 0.08  | 7.99  | 5.91x10 <sup>-1</sup> |
| 168978 | hsa-miR-371b-5p   | -0.06 | 0.96 | 0.01  | 7.89  | 5.00x10 <sup>-1</sup> |
| 169204 | hsa-miR-4709-3p   | -0.06 | 0.96 | -0.14 | 6.58  | 3.57x10 <sup>-1</sup> |

|        |                      |       |      |       |       |                       |
|--------|----------------------|-------|------|-------|-------|-----------------------|
| 148413 | hsa-miR-3614-3p      | -0.06 | 0.96 | 0.32  | 6.30  | 3.15x10 <sup>-1</sup> |
| 169319 | hsa-miR-3136-3p      | -0.06 | 0.96 | -0.45 | 7.50  | 4.96x10 <sup>-1</sup> |
| 42845  | hsa-miR-125b-2-3p    | -0.06 | 0.96 | -0.16 | 6.09  | 5.55x10 <sup>-1</sup> |
| 168950 | hsa-miR-4646-3p      | -0.07 | 0.96 | 0.01  | 6.13  | 2.63x10 <sup>-1</sup> |
| 169320 | hsa-miR-4468         | -0.07 | 0.96 | -0.07 | 7.84  | 5.98x10 <sup>-1</sup> |
| 168619 | hsa-miR-1260b        | -0.07 | 0.95 | 0.21  | 13.94 | 5.30x10 <sup>-1</sup> |
| 46801  | hsa-miR-106a-5p      | -0.07 | 0.95 | 0.00  | 6.85  | 3.38x10 <sup>-1</sup> |
| 13485  | hsa-miR-10a-5p       | -0.07 | 0.95 | 0.15  | 6.82  | 2.94x10 <sup>-1</sup> |
| 169358 | hsa-miR-4417         | -0.07 | 0.95 | -0.08 | 6.45  | 2.92x10 <sup>-1</sup> |
| 46737  | hsa-miR-1265         | -0.07 | 0.95 | 0.07  | 6.35  | 4.10x10 <sup>-1</sup> |
| 148327 | hsa-miR-3651         | -0.07 | 0.95 | 0.11  | 7.88  | 2.84x10 <sup>-1</sup> |
| 168668 | hsa-miR-4732-3p      | -0.07 | 0.95 | -0.41 | 6.36  | 2.44x10 <sup>-1</sup> |
| 42783  | hsa-miR-197-3p       | -0.07 | 0.95 | -0.15 | 6.57  | 3.11x10 <sup>-1</sup> |
| 147738 | hsv2-miR-H20         | -0.07 | 0.95 | 0.08  | 6.17  | 1.64x10 <sup>-1</sup> |
| 42682  | hsa-miR-25-3p        | -0.08 | 0.95 | 0.01  | 6.80  | 3.29x10 <sup>-1</sup> |
| 11164  | hsa-miR-519e-3p      | -0.08 | 0.95 | -0.29 | 6.09  | 1.99x10 <sup>-1</sup> |
| 147947 | hsa-miR-4308         | -0.08 | 0.95 | 0.09  | 6.13  | 2.80x10 <sup>-1</sup> |
| 147820 | hsa-miR-3133         | -0.08 | 0.95 | -0.38 | 7.57  | 4.80x10 <sup>-1</sup> |
| 169188 | hsa-miR-4443         | -0.08 | 0.95 | 0.12  | 10.60 | 4.09x10 <sup>-1</sup> |
| 169214 | hsa-miR-4638-5p      | -0.08 | 0.94 | -0.33 | 6.85  | 2.65x10 <sup>-1</sup> |
| 168819 | hsa-miR-200a-3p      | -0.08 | 0.94 | 0.17  | 7.70  | 2.27x10 <sup>-1</sup> |
| 147199 | hsa-miR-27b-3p       | -0.08 | 0.94 | -0.08 | 6.51  | 2.90x10 <sup>-1</sup> |
| 145852 | hsa-miR-210-3p       | -0.08 | 0.94 | -0.08 | 6.03  | 1.98x10 <sup>-1</sup> |
| 145693 | hsa-miR-92a-3p       | -0.09 | 0.94 | 0.09  | 6.88  | 1.54x10 <sup>-1</sup> |
| 168919 | hsa-miR-4456         | -0.09 | 0.94 | 0.18  | 11.06 | 4.91x10 <sup>-1</sup> |
| 27568  | hsa-miR-744-5p       | -0.09 | 0.94 | -0.23 | 6.36  | 1.21x10 <sup>-1</sup> |
| 169130 | hsa-miR-4764-3p      | -0.10 | 0.94 | -0.18 | 9.02  | 3.65x10 <sup>-1</sup> |
| 168958 | hsa-miR-2681-5p      | -0.10 | 0.93 | -0.38 | 6.95  | 1.75x10 <sup>-1</sup> |
| 145745 | hsa-miR-335-3p       | -0.10 | 0.93 | -0.11 | 8.17  | 2.22x10 <sup>-1</sup> |
| 169399 | hsa-miR-4750-5p      | -0.10 | 0.93 | 0.10  | 6.38  | 2.76x10 <sup>-1</sup> |
| 9938   | hsa-let-7i-5p        | -0.11 | 0.93 | 0.18  | 7.83  | 1.35x10 <sup>-1</sup> |
| 169189 | hsa-miR-4795-5p      | -0.11 | 0.93 | -0.37 | 6.49  | 3.18x10 <sup>-1</sup> |
| 148032 | hsa-miR-3685         | -0.11 | 0.93 | -0.21 | 8.58  | 3.24x10 <sup>-1</sup> |
| 11022  | hsa-miR-221-3p       | -0.11 | 0.93 | 0.23  | 7.61  | 7.55x10 <sup>-2</sup> |
| 42887  | hsa-miR-331-3p       | -0.11 | 0.93 | -0.25 | 6.04  | 4.49x10 <sup>-2</sup> |
| 10987  | hsa-miR-193b-3p      | -0.11 | 0.93 | 0.09  | 7.13  | 3.84x10 <sup>-1</sup> |
| 168638 | hsa-miR-4530         | -0.11 | 0.93 | -0.20 | 6.42  | 2.20x10 <sup>-1</sup> |
| 42571  | hsa-miR-129-1-3p     | -0.11 | 0.93 | -0.16 | 7.24  | 2.65x10 <sup>-1</sup> |
| 146113 | hsa-miRPlus-G1246-3p | -0.11 | 0.93 | 0.15  | 7.08  | 1.09x10 <sup>-1</sup> |
| 169087 | hsa-miR-149-3p       | -0.12 | 0.92 | -0.06 | 6.01  | 2.70x10 <sup>-1</sup> |
| 19582  | hsa-miR-106b-5p      | -0.12 | 0.92 | -0.03 | 7.17  | 1.92x10 <sup>-1</sup> |
| 168878 | hsa-miR-5100         | -0.12 | 0.92 | 0.24  | 14.38 | 3.13x10 <sup>-1</sup> |
| 147942 | hsa-miR-4268         | -0.12 | 0.92 | 0.01  | 7.06  | 1.40x10 <sup>-1</sup> |
| 168656 | hsa-miR-5002-3p      | -0.12 | 0.92 | -0.86 | 7.41  | 2.54x10 <sup>-2</sup> |

|        |                                 |       |      |       |       |                       |
|--------|---------------------------------|-------|------|-------|-------|-----------------------|
| 147588 | hsa-miR-4288                    | -0.12 | 0.92 | -0.06 | 8.02  | 6.92x10 <sup>-2</sup> |
| 13171  | hsa-miR-429                     | -0.12 | 0.92 | 0.04  | 6.04  | 8.38x10 <sup>-2</sup> |
| 169409 | hsa-miR-4286                    | -0.13 | 0.92 | 0.32  | 10.58 | 1.83x10 <sup>-1</sup> |
| 146165 | hsa-miR-1973                    | -0.13 | 0.92 | -0.23 | 6.65  | 7.81x10 <sup>-2</sup> |
| 10997  | hsa-miR-19a-3p                  | -0.13 | 0.92 | 0.03  | 6.42  | 9.47x10 <sup>-2</sup> |
| 13132  | hsa-miR-519e-5p                 | -0.13 | 0.91 | -0.56 | 6.70  | 1.46x10 <sup>-1</sup> |
| 169031 | hsa-miR-4726-5p                 | -0.13 | 0.91 | -0.55 | 7.88  | 1.17x10 <sup>-1</sup> |
| 168836 | hsa-miR-4496                    | -0.13 | 0.91 | -0.27 | 5.87  | 2.36x10 <sup>-1</sup> |
| 145820 | hsa-let-7c-5p                   | -0.13 | 0.91 | 0.24  | 9.39  | 2.10x10 <sup>-1</sup> |
| 168644 | hsa-miR-4775                    | -0.13 | 0.91 | -0.09 | 6.03  | 4.21x10 <sup>-2</sup> |
| 169024 | hsa-miR-3960                    | -0.13 | 0.91 | 0.20  | 8.61  | 2.64x10 <sup>-1</sup> |
| 169312 | hsa-miR-548an                   | -0.13 | 0.91 | -0.21 | 7.86  | 4.42x10 <sup>-2</sup> |
| 169022 | hsa-miR-4797-5p                 | -0.14 | 0.91 | -0.44 | 9.78  | 2.54x10 <sup>-1</sup> |
| 168844 | hsa-miR-4532                    | -0.14 | 0.91 | -0.54 | 9.36  | 1.75x10 <sup>-1</sup> |
| 169110 | hsa-miR-4497                    | -0.14 | 0.91 | -0.06 | 6.76  | 1.23x10 <sup>-1</sup> |
| 147186 | hsa-miR-200b-3p                 | -0.14 | 0.91 | -0.04 | 8.77  | 1.07x10 <sup>-1</sup> |
| 42542  | hsa-miR-589-5p                  | -0.14 | 0.91 | -0.81 | 6.94  | 1.62x10 <sup>-1</sup> |
| 46732  | hsa-miR-1264                    | -0.14 | 0.91 | -0.07 | 10.51 | 1.36x10 <sup>-1</sup> |
| 11040  | hsa-miR-29b-3p                  | -0.15 | 0.90 | -0.13 | 7.26  | 1.65x10 <sup>-1</sup> |
| 42929  | hsa-miR-25-5p                   | -0.15 | 0.90 | -0.22 | 6.27  | 9.23x10 <sup>-2</sup> |
| 169232 | hsa-miR-3156-3p                 | -0.15 | 0.90 | -0.37 | 9.96  | 2.11x10 <sup>-1</sup> |
| 42818  | hsa-miR-597-5p                  | -0.15 | 0.90 | -0.65 | 6.24  | 1.46x10 <sup>-1</sup> |
| 168882 | hsa-miR-664b-3p                 | -0.16 | 0.90 | -0.21 | 8.68  | 1.17x10 <sup>-1</sup> |
| 14285  | hsa-miR-487b-3p                 | -0.16 | 0.90 | -0.58 | 9.20  | 1.85x10 <sup>-1</sup> |
| 169412 | hsa-miR-1260a                   | -0.16 | 0.90 | -0.26 | 11.30 | 2.07x10 <sup>-1</sup> |
| 11245  | hsa-miR-433-5p                  | -0.16 | 0.90 | -0.20 | 9.48  | 2.04x10 <sup>-1</sup> |
| 168933 | hsa-miR-5581-3p                 | -0.16 | 0.89 | -0.46 | 10.56 | 2.36x10 <sup>-1</sup> |
| 168951 | hsa-miR-548as-3p                | -0.16 | 0.89 | -0.22 | 8.64  | 1.87x10 <sup>-1</sup> |
| 168793 | hsa-miR-4483                    | -0.16 | 0.89 | 0.29  | 6.30  | 1.60x10 <sup>-2</sup> |
| 168868 | hsa-miR-5681b                   | -0.17 | 0.89 | -0.14 | 10.38 | 1.35x10 <sup>-1</sup> |
| 11023  | hsa-miR-222-3p                  | -0.17 | 0.89 | 0.12  | 7.82  | 2.76x10 <sup>-2</sup> |
| 147743 | hsa-miR-4275                    | -0.17 | 0.89 | -0.60 | 8.41  | 7.59x10 <sup>-2</sup> |
| 147701 | hsa-miR-491-3p                  | -0.18 | 0.88 | 0.47  | 11.26 | 8.45x10 <sup>-2</sup> |
| 10998  | hsa-miR-19b-3p                  | -0.18 | 0.88 | -0.15 | 6.35  | 1.93x10 <sup>-2</sup> |
| 146161 | hsa-miR-2115-3p                 | -0.18 | 0.88 | -0.10 | 6.87  | 2.46x10 <sup>-2</sup> |
| 17566  | hsa-miR-629-3p                  | -0.18 | 0.88 | -0.33 | 6.32  | 1.02x10 <sup>-1</sup> |
| 148316 | hsa-miR-134-3p                  | -0.18 | 0.88 | -0.42 | 7.13  | 6.13x10 <sup>-2</sup> |
| 169070 | hsa-miR-4695-3p                 | -0.19 | 0.88 | -0.13 | 10.19 | 1.80x10 <sup>-1</sup> |
| 148278 | hsa-miR-138-2-3p                | -0.19 | 0.87 | -0.29 | 9.03  | 6.82x10 <sup>-2</sup> |
| 146086 | hsa-miR-30a-5p                  | -0.20 | 0.87 | -0.20 | 6.28  | 1.22x10 <sup>-2</sup> |
| 10977  | hsa-miR-183-5p                  | -0.20 | 0.87 | -0.17 | 7.36  | 2.95x10 <sup>-3</sup> |
| 17328  | ebv-miR-BART8-3p                | -0.21 | 0.87 | -0.16 | 6.39  | 9.07x10 <sup>-2</sup> |
| 11078  | hsa-miR-365a-3p/hsa-miR-365b-3p | -0.21 | 0.86 | 0.27  | 7.49  | 1.32x10 <sup>-2</sup> |
| 168709 | hsa-miR-4429                    | -0.22 | 0.86 | -0.08 | 7.74  | 2.21x10 <sup>-1</sup> |



|        |                   |       |      |       |      |                       |
|--------|-------------------|-------|------|-------|------|-----------------------|
| 146112 | hsa-miR-30b-5p    | -0.22 | 0.86 | 0.00  | 6.70 | 3.89x10 <sup>-2</sup> |
| 145676 | hsa-miR-30e-3p    | -0.22 | 0.86 | -0.05 | 6.07 | 1.19x10 <sup>-3</sup> |
| 42932  | hsa-miR-920       | -0.24 | 0.84 | -0.31 | 6.59 | 8.01x10 <sup>-2</sup> |
| 169102 | hsa-miR-4639-3p   | -0.26 | 0.83 | -0.24 | 8.87 | 3.19x10 <sup>-2</sup> |
| 169416 | hsa-miRPlus-A1086 | -0.29 | 0.82 | -0.48 | 6.72 | 7.49x10 <sup>-5</sup> |
| 147554 | hsa-miR-4273      | -0.30 | 0.81 | -0.31 | 6.20 | 1.72x10 <sup>-1</sup> |
| 17848  | hsa-miRPlus-A1087 | -0.32 | 0.80 | -0.33 | 8.29 | 5.82x10 <sup>-4</sup> |
| 168727 | hsa-miR-4426      | -0.34 | 0.79 | -0.36 | 6.57 | 2.46x10 <sup>-1</sup> |
| 169247 | hsa-miR-4477a     | -0.35 | 0.78 | -0.39 | 6.15 | 1.15x10 <sup>-1</sup> |
| 42923  | hsa-miR-30c-5p    | -0.39 | 0.76 | -0.10 | 7.27 | 2.95x10 <sup>-4</sup> |
| 10964  | hsa-miR-155-5p    | -0.50 | 0.71 | 0.25  | 8.60 | 3.97x10 <sup>-5</sup> |

**Table SII.** qPCR primers.

| Target               | Forward primer                  | Reverse primer                | Ref.                 |
|----------------------|---------------------------------|-------------------------------|----------------------|
| <i>AKT3</i>          | GTTGGAGAATCTAATGCTGGA           | TCATTATCTTCTAACACCTCTGG       | (1)                  |
| <i>BCL2</i>          | CTGCACCTGACGCCCTTCACC           | CACATGACCCCACCGAACTCAAAG<br>A | (1)                  |
| <i>BMPR2</i>         | GTAAGCTCTTGCCGTCTTGC            | ATCTCGATGGGAAATTGCAG          | The present<br>study |
| <i>CBLB</i>          | AATCCCACCAGACAATAGACTGAGTA<br>G | CATTGGCGGGTCTTTGGA            | (2)                  |
| <i>ETS1</i>          | TTATCACCAGCAAAGACCT             | AAGCCGACTCTCACCATCAT          | The present<br>study |
| <i>KRAS</i>          | GCCTGCTGAAAATGACTGAATATA        | TTAGCTGTATCGTCAAGGCACTC       | (3)                  |
| <i>LAMC1</i>         | AGATGGAAGCTGAGAATCTGG           | CGGTCTGCTGTTTCAGTCTTG         | The present<br>study |
| <i>MAP2K1</i>        | CAATGGCGGTGTGGTGTTCC            | AGCTCCCTTATGATCTGGTTCC        | (4)                  |
| <i>MAPK1</i>         | TCTGGCAGGCAGGCAGGCAAT           | TGACCGGGAGGAGGAAGGAAGA        | (5)                  |
| <i>PIK3R3</i>        | GAGAGGGGAATGAAAAGGAGA           | ATCATGAATCTCACCCAGACG         | (6)                  |
| <i>PLD1</i>          | GAGCCTGCTACAGATGGTCA            | TGTCTA CCAGCAGGACGAAG         | (7)                  |
| <i>PRKCA</i>         | TGGGTCACTGCTCTATGGACTTATC       | CGCCCCCTCTTCTCAGTGT           | (8)                  |
| <i>RAP1B</i>         | ATTCCAGCGTGAGAGGTTC             | CTGGCACTGTTGAATTGGGC          | (9)                  |
| <i>STAT3</i>         | GCTTTTGTGACGCGATGGAGT           | ATTTGTTGACGGGTCTGAAGTT        | (10)                 |
| <i>XIAP1</i>         | TGGGACATGGATATACTCAGTTAACA<br>A | GTTAGCCCTCCTCCACAGTGAA        | (11)                 |
| <i>RNA18SN<br/>1</i> | GTAACCCGTTGAACCCCAT             | CCATCCAATCGGTAGTAGCG          | (12)                 |
| <i>HPRT</i>          | TGGCGTCGTGATTAGTGATG            | CAGAGGGCTACAATGTGATG          | (13)                 |
| <i>GAPDH</i>         | GGCACC GTCAAG GCTGAG            | GGTGGT GAAGAC GCCAGT G        | The present<br>study |
| <i>ACTB1</i>         | CGGCATCGTCACCAACTG              | GCTGGGGTGTGTAAGGTCTC          | (14)                 |

**References for primers:**

1. Tafsiri E, Darbouy M, Shadmehr MB, Cho WC and Karimipoor M: Aberrant expression of oncogenic and tumor-suppressive microRNAs and their target genes in human adenocarcinoma alveolar basal epithelial cells. *J Cancer Res Ther* 12:395-400, 2016.
2. Ogawa T, Furochi H, Mameoka M, Hirasaka K, Onishi Y, Suzue N, Oarada M, Akamatsu M, Akima H *et al*: Ubiquitin ligase gene expression in healthy volunteers with 20-day bedrest. *Muscle Nerve* 34:463-469, 2006.
3. Heighway J, Betticher DC, Hoban PR, Altermatt HJ and Cowen R: Coamplification in tumors of KRAS2, type 2 inositol 1,4,5 triphosphate receptor gene, and a novel human gene, KRAG. *Genomics* 35:207-214, 1996.

4. Wang H, Yuan M, Wang S, Zhang L, Zhang R, Zou X, Wang X, Chen D and Wu Z: STAT3 Regulates the Type I IFN-Mediated Antiviral Response by Interfering with the Nuclear Entry of STAT1. *Int J Mol Sci* 20:4870, 2019.
5. Grasso L, Suska O, Davidson L, Gonatopoulos-Pournatzis T, Williamson R, Wasmus L, Wiedlich S, Peggie M, Stavridis MP *et al*: mRNA Cap Methylation in Pluripotency and Differentiation. *Cell Rep* 16:1352-1365, 2016.
6. Munkley J, Livermore KE, McClurg UL, Kalna G, Knight B, McCullagh P, McGrath J, Crundwell M, Leung HY *et al*: The PI3K regulatory subunit gene PIK3R1 is under direct control of androgens and repressed in prostate cancer cells. *Oncoscience* 2:755-764, 2015.
7. Clegg NJ, Wongvipat J, Joseph JD, Tran C, Ouk S, Dilhas A, Chen Y, Grillot K, Bischoff ED *et al*: ARN-509: a novel antiandrogen for prostate cancer treatment. *Cancer Res* 72:1494-1503, 2012.
8. Riwaldt S, Bauer J, Wehland M, Slumstrup L, Kopp S, Warnke E, Dittrich A, Magnusson NE, Pietsch J *et al*: Pathways Regulating Spheroid Formation of Human Follicular Thyroid Cancer Cells under Simulated Microgravity Conditions: A Genetic Approach. *Int J Mol Sci* 17:528, 2016.
9. Liu M, Wang Y, Lu H, Wang H, Shi X, Shao X, Li YX, Zhao Y and Wang YL: miR-518b Enhances Human Trophoblast Cell Proliferation Through Targeting Rap1b and Activating Ras-MAPK Signal. *Front Endocrinol (Lausanne)* 9:100, 2018.
10. Xiong H, Chen ZF, Liang QC, Du W, Chen HM, Su WY, Chen GQ, Han ZG and Fang JY: Inhibition of DNA methyltransferase induces G2 cell cycle arrest and apoptosis in human colorectal cancer cells via inhibition of JAK2/STAT3/STAT5 signalling. *J Cell Mol Med* 13:3668-3679, 2009.
11. Walsby E, Pratt G, Shao H, Abbas AY, Fischer PM, Bradshaw TD, Brennan P, Fegan C, Wang S and Pepper CA novel Cdk9 inhibitor preferentially targets tumor cells and synergizes with fludarabine. *Oncotarget* 5:375-385, 2014.
12. Piekielko-Witkowska A, Wiszomirska H, Wojcicka A, Poplawski P, Bogusławska J, Tanski Z and Nauman A: Disturbed expression of splicing factors in renal cancer affects alternative splicing of apoptosis regulators, oncogenes, and tumor suppressors. *PLoS One*, 2010.
13. Kędzierska H, Popławski P, Hoser G, Rybicka B, Rodzik K, Sokół E, Bogusławska J, Tański Z, Fogtman A *et al*: Decreased Expression of SRSF2 Splicing Factor Inhibits Apoptotic Pathways in Renal Cancer. *Int J Mol Sci* 28:17, 2016.
14. Master A, Wójcicka A, Piekielko-Witkowska A, Bogusławska J, Popławski P, Tański Z, Darras VM, Williams GR and Nauman A: Untranslated regions of thyroid hormone receptor beta 1 mRNA are impaired in human clear cell renal cell carcinoma. *Biochim Biophys Acta* 1802:995-1005, 2010.

**Table SIII.** Oligonucleotides used for cloning of miRNA target sites.

| Oligonucleotide          | Sequence                                |
|--------------------------|-----------------------------------------|
| BMPR2_30c_MUTantisense_2 | CTAGACGGACATGCAGTGCTGGATTTGGATATCGAGCT  |
| BMPR2_30c_MUTsense_2     | CGATATCCAAATCCAGCACTGCATGTCCGT          |
| BMPR2_181ab_antisense    | CTAGACACATTCAAACAAAACACAAGAGGATATCGAGCT |
| BMPR2_181ab_sense        | CGATATCCTCTTGTGTTTTGTTTGAATGTGT         |
| BMPR2_30c_antisense      | CTAGAGGTAAACAGCAGTGCTGGATTTGGATATCGAGCT |
| BMPR2_30c_sense          | CGATATCCAAATCCAGCACTGCTGTTTACCT         |
| ETS1_125b_MUTantisense_2 | CTAGATCGCGGCGCAGCTCCTAAAATATGATATCGAGCT |
| ETS1_125b_MUTsense_2     | CGATATCATATTTTAGGAGCTGCGCCGCGAT         |
| ETS1_155_2_MUTantisense  | CTAGACCGGCATCGTAAAACCCAGAGTGGATATCGAGCT |
| ETS1_155_2_MUTsense      | CGATATCCACTCTGGGTTTTACGATGCCGGT         |
| ETS1_125b_antisense      | CTAGATCCCTGAGCAGCTCCTAAAATATGATATCGAGCT |
| ETS1_125b_sense          | CGATATCATATTTTAGGAGCTGCTCAGGGAT         |
| ETS1_181ab_antisense     | CTAGATACATTCAGTTCAAAGACTTAATGATATCGAGCT |
| ETS1_181ab_sense         | CGATATCATTAAGTCTTTGAACTGAATGTAT         |
| ETS1_155_2_antisense     | CTAGATTAATGCTGTAAAACCCAGAGTGGATATCGAGCT |
| ETS1_155_2_sense         | CGATATCCACTCTGGGTTTTACAGCATTAAAT        |
| ETS1_155_1_antisense     | CTAGATTAATGCTTCTTAGCTCAACATTGATATCGAGCT |
| ETS1_155_1_sense         | CGATATCAATGTTGAGCTAAGAAGCATTAAAT        |

Table SIV. The table shows the results of the analysis of the publically available transcriptomic data (GSE42718, Morizane et al., 2014). The data were analyzed using GEO2R (<https://www.ncbi.nlm.nih.gov/geo/geo2r/>). The table shows only data for miRNAs corresponding to these analyzed in the present study. P values statistically significant were marked in orange.

| ID    | Adjusted P value | P value               | t     | B     | logFC | miRNA_ID        |
|-------|------------------|-----------------------|-------|-------|-------|-----------------|
| 175   | 0.74             | 2.15x10 <sup>-3</sup> | 5.24  | -4.45 | 4.86  | mmu-miR-125b-5p |
| 14789 | 0.74             | 4.51x10 <sup>-3</sup> | 4.49  | -4.46 | 3.55  | mmu-miR-181b    |
| 5599  | 0.74             | 1.56x10 <sup>-2</sup> | 3.38  | -4.48 | 1.89  | mmu-miR-181b    |
| 7279  | 0.74             | 2.27x10 <sup>-2</sup> | 3.08  | -4.49 | 1.73  | mmu-miR-181b    |
| 5810  | 0.74             | 2.45x10 <sup>-2</sup> | 3.02  | -4.49 | 1.21  | mmu-miR-181b    |
| 7718  | 0.74             | 2.49x10 <sup>-2</sup> | 3.01  | -4.50 | 1.43  | mmu-miR-125b-5p |
| 888   | 0.74             | 2.52x10 <sup>-2</sup> | 2.99  | -4.50 | 1.28  | mmu-miR-125b-5p |
| 6912  | 0.74             | 2.98x10 <sup>-2</sup> | 2.86  | -4.50 | 1.67  | mmu-miR-181b    |
| 12757 | 0.74             | 2.98x10 <sup>-2</sup> | 2.86  | -4.50 | 1.40  | mmu-miR-125b-5p |
| 3901  | 0.74             | 3.42x10 <sup>-2</sup> | 2.76  | -4.50 | 1.26  | mmu-miR-125b-5p |
| 855   | 0.74             | 3.63x10 <sup>-2</sup> | 2.71  | -4.51 | 1.36  | mmu-miR-125b-5p |
| 8144  | 0.74             | 3.71x10 <sup>-2</sup> | 2.69  | -4.51 | 1.32  | mmu-miR-125b-5p |
| 13072 | 0.74             | 3.90x10 <sup>-2</sup> | 2.65  | -4.51 | 1.34  | mmu-miR-125b-5p |
| 2623  | 0.74             | 4.09x10 <sup>-2</sup> | 2.62  | -4.51 | 1.42  | mmu-miR-125b-5p |
| 11968 | 0.74             | 4.09x10 <sup>-2</sup> | 2.62  | -4.51 | 1.46  | mmu-miR-125b-5p |
| 4890  | 0.74             | 4.23x10 <sup>-2</sup> | 2.59  | -4.51 | 1.15  | mmu-miR-181b    |
| 8308  | 0.74             | 4.49x10 <sup>-2</sup> | 2.55  | -4.51 | 1.38  | mmu-miR-125b-5p |
| 7203  | 0.74             | 4.55x10 <sup>-2</sup> | 2.54  | -4.51 | 1.25  | mmu-miR-125b-5p |
| 5602  | 0.74             | 4.56x10 <sup>-2</sup> | 2.54  | -4.51 | 0.96  | mmu-miR-181b    |
| 4405  | 0.74             | 4.66x10 <sup>-2</sup> | -2.52 | -4.51 | -0.97 | mmu-miR-30c     |
| 11921 | 0.74             | 5.02x10 <sup>-2</sup> | 2.46  | -4.52 | 1.06  | mmu-miR-181b    |
| 5169  | 0.74             | 5.02x10 <sup>-2</sup> | 2.46  | -4.52 | 0.63  | mmu-miR-155     |
| 7534  | 0.74             | 5.59x10 <sup>-2</sup> | 2.38  | -4.52 | 1.09  | mmu-miR-181b    |
| 5076  | 0.74             | 5.67x10 <sup>-2</sup> | 2.37  | -4.52 | 1.16  | mmu-miR-181b    |
| 7239  | 0.74             | 5.91x10 <sup>-2</sup> | 2.34  | -4.52 | 1.20  | mmu-miR-181b    |
| 961   | 0.74             | 6.07x10 <sup>-2</sup> | 2.32  | -4.52 | 1.13  | mmu-miR-181b    |
| 12449 | 0.74             | 6.48x10 <sup>-2</sup> | 2.27  | -4.53 | 1.06  | mmu-miR-181b    |
| 3215  | 0.74             | 7.33x10 <sup>-2</sup> | 2.18  | -4.53 | 2.61  | mmu-miR-125b-5p |
| 5893  | 0.74             | 7.57x10 <sup>-2</sup> | 2.16  | -4.53 | 0.70  | mmu-miR-181b    |
| 13514 | 0.74             | 7.88x10 <sup>-2</sup> | 2.13  | -4.53 | 2.31  | mmu-miR-155     |
| 14672 | 0.74             | 8.70x10 <sup>-2</sup> | 2.06  | -4.54 | 0.93  | mmu-miR-181b    |
| 1796  | 0.74             | 9.33x10 <sup>-2</sup> | 2.01  | -4.54 | 0.56  | mmu-miR-155     |
| 10891 | 0.74             | 1.24x10 <sup>-1</sup> | -1.80 | -4.55 | -0.41 | mmu-miR-30c     |
| 9767  | 0.74             | 1.88x10 <sup>-1</sup> | 1.49  | -4.57 | 0.46  | mmu-miR-155     |
| 3356  | 0.74             | 1.94x10 <sup>-1</sup> | 1.47  | -4.57 | 2.74  | mmu-miR-181a    |
| 11731 | 0.74             | 2.12x10 <sup>-1</sup> | 1.40  | -4.57 | 1.21  | mmu-miR-155     |
| 347   | 0.74             | 2.14x10 <sup>-1</sup> | 1.40  | -4.57 | 0.39  | mmu-miR-155     |
| 5239  | 0.75             | 2.27x10 <sup>-1</sup> | 1.35  | -4.58 | 0.47  | mmu-miR-155     |
| 78    | 0.75             | 2.31x10 <sup>-1</sup> | 1.34  | -4.58 | 1.36  | mmu-miR-181a    |

|       |      |                       |       |       |       |                 |
|-------|------|-----------------------|-------|-------|-------|-----------------|
| 3055  | 0.75 | 2.32x10 <sup>-1</sup> | 1.34  | -4.58 | 0.45  | mmu-miR-155     |
| 6     | 0.75 | 2.36x10 <sup>-1</sup> | 1.32  | -4.58 | 0.35  | mmu-miR-155     |
| 9878  | 0.75 | 2.44x10 <sup>-1</sup> | 1.30  | -4.58 | 0.41  | mmu-miR-155     |
| 456   | 0.76 | 2.50x10 <sup>-1</sup> | -1.28 | -4.58 | -0.39 | mmu-miR-30c     |
| 3277  | 0.77 | 2.70x10 <sup>-1</sup> | 1.22  | -4.58 | 0.43  | mmu-miR-155     |
| 14411 | 0.79 | 2.98x10 <sup>-1</sup> | 1.14  | -4.59 | 0.87  | mmu-miR-181a    |
| 9350  | 0.80 | 3.16x10 <sup>-1</sup> | 1.10  | -4.59 | 0.55  | mmu-miR-181a    |
| 7515  | 0.81 | 3.38x10 <sup>-1</sup> | 1.04  | -4.59 | 0.33  | mmu-miR-155     |
| 8670  | 0.81 | 3.58x10 <sup>-1</sup> | -1.00 | -4.60 | -0.69 | mmu-miR-30c     |
| 10092 | 0.81 | 3.65x10 <sup>-1</sup> | 0.98  | -4.60 | 0.34  | mmu-miR-155     |
| 10817 | 0.82 | 3.80x10 <sup>-1</sup> | -0.95 | -4.60 | -0.43 | mmu-miR-30c     |
| 14394 | 0.82 | 3.99x10 <sup>-1</sup> | 0.91  | -4.60 | 0.52  | mmu-miR-181b    |
| 1331  | 0.83 | 4.29x10 <sup>-1</sup> | 0.85  | -4.60 | 0.49  | mmu-miR-155     |
| 13278 | 0.84 | 4.65x10 <sup>-1</sup> | -0.78 | -4.61 | -0.70 | mmu-miR-30c     |
| 14552 | 0.84 | 4.67x10 <sup>-1</sup> | 0.78  | -4.61 | 0.32  | mmu-miR-155     |
| 9218  | 0.85 | 5.00x10 <sup>-1</sup> | 0.72  | -4.61 | 0.30  | mmu-miR-155     |
| 10504 | 0.85 | 5.02x10 <sup>-1</sup> | 0.72  | -4.61 | 0.64  | mmu-miR-125b-5p |
| 9443  | 0.88 | 5.85x10 <sup>-1</sup> | -0.58 | -4.62 | -0.22 | mmu-miR-155     |
| 8044  | 0.90 | 6.43x10 <sup>-1</sup> | -0.49 | -4.62 | -0.55 | mmu-miR-30c     |
| 10029 | 0.92 | 6.97x10 <sup>-1</sup> | -0.41 | -4.62 | -0.11 | mmu-miR-155     |
| 5522  | 0.94 | 7.71x10 <sup>-1</sup> | 0.30  | -4.62 | 0.31  | mmu-miR-30c     |
| 10513 | 0.96 | 8.17x10 <sup>-1</sup> | 0.24  | -4.63 | 0.26  | mmu-miR-30c     |
| 2083  | 0.97 | 8.65x10 <sup>-1</sup> | -0.18 | -4.63 | -0.14 | mmu-miR-155     |
| 11096 | 0.98 | 9.16x10 <sup>-1</sup> | 0.11  | -4.63 | 0.06  | mmu-miR-30c     |
| 4902  | 0.98 | 9.16x10 <sup>-1</sup> | 0.11  | -4.63 | 0.10  | mmu-miR-125b-5p |

Table SV. The table shows the results of the analysis of the publicly available transcriptomic data (GSE42718, Morizane et al., 2014). The data were analyzed using GEO2R (<https://www.ncbi.nlm.nih.gov/geo/geo2r/>). The table shows all miRNAs available in GSE42718 dataset. None of the analyzed miRNAs were statistically significantly changed following Benjamini & Hochberg (False discovery rate) correction. The data are sorted based on P-values. P values statistically significant are marked in orange.

| ID    | Adjusted P-value | P-value               | t     | B     | logFC | miRNA_ID        |
|-------|------------------|-----------------------|-------|-------|-------|-----------------|
| 7226  | 0.74             | 1.06x10 <sup>-3</sup> | 6.03  | -4.44 | 1.79  | mmu-miR-345-5p  |
| 5667  | 0.74             | 1.59x10 <sup>-3</sup> | 5.56  | -4.44 | 1.75  |                 |
| 930   | 0.74             | 1.85x10 <sup>-3</sup> | 5.40  | -4.45 | 2.96  | mmu-miR-301b    |
| 175   | 0.74             | 2.15x10 <sup>-3</sup> | 5.24  | -4.45 | 4.86  | mmu-miR-125b-5p |
| 3061  | 0.74             | 2.40x10 <sup>-3</sup> | 5.12  | -4.45 | 1.43  | mmu-miR-93      |
| 12260 | 0.74             | 3.01x10 <sup>-3</sup> | -4.89 | -4.45 | -1.88 | mmu-miR-466l    |
| 2606  | 0.74             | 3.27x10 <sup>-3</sup> | 4.81  | -4.45 | 1.43  | mmu-miR-30b*    |
| 6643  | 0.74             | 3.28x10 <sup>-3</sup> | 4.80  | -4.45 | 1.38  | mmu-miR-99b     |
| 5630  | 0.74             | 4.37x10 <sup>-3</sup> | 4.52  | -4.46 | 1.47  |                 |
| 14789 | 0.74             | 4.51x10 <sup>-3</sup> | 4.49  | -4.46 | 3.55  | mmu-miR-181b    |
| 15431 | 0.74             | 4.70x10 <sup>-3</sup> | 4.45  | -4.46 | 1.38  | mmu-miR-483*    |
| 15654 | 0.74             | 5.06x10 <sup>-3</sup> | -4.38 | -4.46 | -1.73 | mmu-miR-126-3p  |
| 6010  | 0.74             | 6.75x10 <sup>-3</sup> | 4.11  | -4.47 | 1.50  | mmu-miR-350     |
| 4127  | 0.74             | 7.65x10 <sup>-3</sup> | 4.00  | -4.47 | 2.17  |                 |
| 625   | 0.74             | 8.24x10 <sup>-3</sup> | 3.93  | -4.47 | 0.97  | mmu-miR-350     |
| 9924  | 0.74             | 8.31x10 <sup>-3</sup> | 3.92  | -4.47 | 1.51  | mmu-miR-93      |
| 14599 | 0.74             | 8.64x10 <sup>-3</sup> | 3.89  | -4.47 | 2.31  | mmu-miR-376c*   |
| 10318 | 0.74             | 8.94x10 <sup>-3</sup> | 3.86  | -4.47 | 1.01  |                 |
| 15343 | 0.74             | 9.21x10 <sup>-3</sup> | 3.83  | -4.47 | 1.07  | mmu-miR-1906    |
| 9142  | 0.74             | 9.29x10 <sup>-3</sup> | 3.82  | -4.47 | 1.68  | mmu-miR-193     |
| 8599  | 0.74             | 9.68x10 <sup>-3</sup> | -3.79 | -4.47 | -1.77 | mmu-miR-30c-2*  |
| 3522  | 0.74             | 1.08x10 <sup>-2</sup> | 3.70  | -4.47 | 1.73  | mmu-miR-92b     |
| 12958 | 0.74             | 1.09x10 <sup>-2</sup> | 3.69  | -4.48 | 1.06  | mmu-miR-30d     |
| 13785 | 0.74             | 1.11x10 <sup>-2</sup> | 3.67  | -4.48 | 0.98  | mmu-miR-25      |
| 5427  | 0.74             | 1.15x10 <sup>-2</sup> | 3.64  | -4.48 | 1.03  | mmu-miR-324-3p  |
| 362   | 0.74             | 1.20x10 <sup>-2</sup> | -3.61 | -4.48 | -1.34 | mmu-miR-499     |
| 5004  | 0.74             | 1.21x10 <sup>-2</sup> | 3.60  | -4.48 | 1.76  | mmu-miR-741     |
| 7921  | 0.74             | 1.26x10 <sup>-2</sup> | 3.56  | -4.48 | 1.38  | mmu-miR-30d     |
| 12812 | 0.74             | 1.35x10 <sup>-2</sup> | 3.51  | -4.48 | 1.28  | mmu-miR-34a     |
| 1510  | 0.74             | 1.40x10 <sup>-2</sup> | 3.47  | -4.48 | 2.15  |                 |
| 6591  | 0.74             | 1.47x10 <sup>-2</sup> | 3.43  | -4.48 | 1.11  | mmu-miR-30c-2*  |
| 12006 | 0.74             | 1.55x10 <sup>-2</sup> | 3.39  | -4.48 | 0.93  | mmu-miR-350     |
| 5599  | 0.74             | 1.56x10 <sup>-2</sup> | 3.38  | -4.48 | 1.89  | mmu-miR-181b    |
| 1318  | 0.74             | 1.60x10 <sup>-2</sup> | 3.36  | -4.48 | 1.13  | mmu-miR-93      |
| 15381 | 0.74             | 1.61x10 <sup>-2</sup> | -3.35 | -4.48 | -2.01 | mmu-miR-872     |
| 13763 | 0.74             | 1.64x10 <sup>-2</sup> | 3.34  | -4.48 | 2.61  | mmu-miR-148b    |
| 1926  | 0.74             | 1.66x10 <sup>-2</sup> | 3.33  | -4.48 | 1.86  | mmu-miR-34c     |
| 1723  | 0.74             | 1.72x10 <sup>-2</sup> | 3.30  | -4.49 | 0.76  | mmu-miR-25      |
| 880   | 0.74             | 1.81x10 <sup>-2</sup> | 3.26  | -4.49 | 1.90  | mmu-miR-689     |

|       |      |                       |       |       |       |                 |
|-------|------|-----------------------|-------|-------|-------|-----------------|
| 13053 | 0.74 | 1.87x10 <sup>-2</sup> | 3.23  | -4.49 | 1.26  | mmu-miR-483*    |
| 6910  | 0.74 | 1.93x10 <sup>-2</sup> | 3.21  | -4.49 | 2.32  | mmu-miR-19b     |
| 1972  | 0.74 | 1.93x10 <sup>-2</sup> | 3.21  | -4.49 | 1.36  | mmu-miR-34c     |
| 1443  | 0.74 | 1.93x10 <sup>-2</sup> | 3.21  | -4.49 | 0.90  | mmu-miR-503     |
| 15538 | 0.74 | 1.97x10 <sup>-2</sup> | -3.19 | -4.49 | -2.70 | mmu-miR-291b-3p |
| 11749 | 0.74 | 2.01x10 <sup>-2</sup> | 3.18  | -4.49 | 1.29  | mmu-miR-92a     |
| 5336  | 0.74 | 2.03x10 <sup>-2</sup> | 3.17  | -4.49 | 1.00  | mmu-miR-465a-3p |
| 14203 | 0.74 | 2.16x10 <sup>-2</sup> | 3.12  | -4.49 | 0.72  | mmu-miR-25      |
| 13860 | 0.74 | 2.21x10 <sup>-2</sup> | 3.10  | -4.49 | 2.91  | mmu-miR-149     |
| 3706  | 0.74 | 2.24x10 <sup>-2</sup> | 3.09  | -4.49 | 4.78  | mmu-miR-135a*   |
| 10703 | 0.74 | 2.25x10 <sup>-2</sup> | 3.09  | -4.49 | 1.11  | mmu-miR-210     |
| 7279  | 0.74 | 2.27x10 <sup>-2</sup> | 3.08  | -4.49 | 1.73  | mmu-miR-181b    |
| 15499 | 0.74 | 2.31x10 <sup>-2</sup> | 3.07  | -4.49 | 1.75  |                 |
| 6894  | 0.74 | 2.33x10 <sup>-2</sup> | 3.06  | -4.49 | 1.38  | mmu-miR-298     |
| 2828  | 0.74 | 2.35x10 <sup>-2</sup> | 3.05  | -4.49 | 1.36  | mmu-miR-34a     |
| 8633  | 0.74 | 2.36x10 <sup>-2</sup> | 3.05  | -4.49 | 1.37  | mmu-miR-34a     |
| 11846 | 0.74 | 2.39x10 <sup>-2</sup> | 3.03  | -4.49 | 0.99  | mmu-miR-25      |
| 127   | 0.74 | 2.43x10 <sup>-2</sup> | 3.02  | -4.49 | 0.99  | mmu-miR-31      |
| 5810  | 0.74 | 2.45x10 <sup>-2</sup> | 3.02  | -4.49 | 1.21  | mmu-miR-181b    |
| 3621  | 0.74 | 2.45x10 <sup>-2</sup> | 3.02  | -4.49 | 1.01  | mmu-miR-20b     |
| 4034  | 0.74 | 2.48x10 <sup>-2</sup> | 3.01  | -4.50 | 1.46  | mmu-miR-34c     |
| 7718  | 0.74 | 2.49x10 <sup>-2</sup> | 3.01  | -4.50 | 1.43  | mmu-miR-125b-5p |
| 888   | 0.74 | 2.52x10 <sup>-2</sup> | 2.99  | -4.50 | 1.28  | mmu-miR-125b-5p |
| 10521 | 0.74 | 2.53x10 <sup>-2</sup> | 2.99  | -4.50 | 1.12  | mmu-miR-93      |
| 7812  | 0.74 | 2.56x10 <sup>-2</sup> | 2.98  | -4.50 | 1.61  | mmu-miR-1906    |
| 8330  | 0.74 | 2.60x10 <sup>-2</sup> | 2.97  | -4.50 | 4.27  | mmu-miR-714     |
| 2164  | 0.74 | 2.61x10 <sup>-2</sup> | 2.97  | -4.50 | 0.89  | mmu-miR-29a     |
| 9923  | 0.74 | 2.64x10 <sup>-2</sup> | 2.96  | -4.50 | 1.56  | mmu-miR-1906    |
| 4840  | 0.74 | 2.67x10 <sup>-2</sup> | 2.95  | -4.50 | 0.80  | mmu-miR-296-5p  |
| 2243  | 0.74 | 2.71x10 <sup>-2</sup> | 2.94  | -4.50 | 1.86  | mmu-miR-302d    |
| 7411  | 0.74 | 2.72x10 <sup>-2</sup> | 2.93  | -4.50 | 1.27  | mmu-miR-340-3p  |
| 6931  | 0.74 | 2.72x10 <sup>-2</sup> | 2.93  | -4.50 | 2.81  | mmu-miR-689     |
| 7077  | 0.74 | 2.74x10 <sup>-2</sup> | 2.93  | -4.50 | 1.10  | mmu-miR-28      |
| 8058  | 0.74 | 2.74x10 <sup>-2</sup> | 2.93  | -4.50 | 1.05  | mmu-miR-206     |
| 14506 | 0.74 | 2.76x10 <sup>-2</sup> | -2.92 | -4.50 | -1.67 |                 |
| 10388 | 0.74 | 2.78x10 <sup>-2</sup> | 2.92  | -4.50 | 1.30  | mmu-miR-34a     |
| 7974  | 0.74 | 2.81x10 <sup>-2</sup> | 2.91  | -4.50 | 1.76  | mmu-miR-183*    |
| 6423  | 0.74 | 2.83x10 <sup>-2</sup> | 2.90  | -4.50 | 2.40  | mmu-miR-30c-1*  |
| 12595 | 0.74 | 2.84x10 <sup>-2</sup> | -2.90 | -4.50 | -1.38 | mmu-miR-148a    |
| 4395  | 0.74 | 2.86x10 <sup>-2</sup> | -2.90 | -4.50 | -1.29 | mmu-miR-669l    |
| 4598  | 0.74 | 2.86x10 <sup>-2</sup> | 2.90  | -4.50 | 0.94  | mmu-miR-25      |
| 3738  | 0.74 | 2.93x10 <sup>-2</sup> | 2.87  | -4.50 | 0.77  | mmu-miR-206     |
| 3625  | 0.74 | 2.94x10 <sup>-2</sup> | 2.87  | -4.50 | 2.68  | mmu-miR-702     |
| 3912  | 0.74 | 2.94x10 <sup>-2</sup> | 2.87  | -4.50 | 4.56  | mmu-miR-714     |
| 6912  | 0.74 | 2.98x10 <sup>-2</sup> | 2.86  | -4.50 | 1.67  | mmu-miR-181b    |
| 12757 | 0.74 | 2.98x10 <sup>-2</sup> | 2.86  | -4.50 | 1.40  | mmu-miR-125b-5p |



|       |      |                       |       |       |       |                 |
|-------|------|-----------------------|-------|-------|-------|-----------------|
| 10511 | 0.74 | 3.04x10 <sup>-2</sup> | 2.85  | -4.50 | 0.88  | mmu-miR-92a     |
| 4315  | 0.74 | 3.07x10 <sup>-2</sup> | 2.84  | -4.50 | 1.05  | mmu-miR-28      |
| 5930  | 0.74 | 3.07x10 <sup>-2</sup> | 2.84  | -4.50 | 4.87  | mmu-miR-714     |
| 6850  | 0.74 | 3.08x10 <sup>-2</sup> | 2.84  | -4.50 | 1.68  | mmu-miR-450b-3p |
| 8073  | 0.74 | 3.09x10 <sup>-2</sup> | 2.83  | -4.50 | 2.72  | mmu-miR-188-5p  |
| 10966 | 0.74 | 3.10x10 <sup>-2</sup> | 2.83  | -4.50 | 0.78  | mmu-miR-25      |
| 5992  | 0.74 | 3.12x10 <sup>-2</sup> | 2.83  | -4.50 | 1.13  | mmu-miR-20a     |
| 3282  | 0.74 | 3.13x10 <sup>-2</sup> | -2.82 | -4.50 | -2.96 |                 |
| 12369 | 0.74 | 3.19x10 <sup>-2</sup> | -2.81 | -4.50 | -1.25 | mmu-miR-10b     |
| 7381  | 0.74 | 3.20x10 <sup>-2</sup> | 2.81  | -4.50 | 1.77  | mmu-miR-467e    |
| 6411  | 0.74 | 3.21x10 <sup>-2</sup> | 2.80  | -4.50 | 1.57  | mmu-miR-142-3p  |
| 2990  | 0.74 | 3.25x10 <sup>-2</sup> | -2.79 | -4.50 | -0.85 | mmu-miR-30c-2*  |
| 7992  | 0.74 | 3.29x10 <sup>-2</sup> | 2.79  | -4.50 | 1.22  | mmu-miR-92a     |
| 5383  | 0.74 | 3.30x10 <sup>-2</sup> | 2.78  | -4.50 | 1.53  | mmu-miR-290-3p  |
| 2020  | 0.74 | 3.33x10 <sup>-2</sup> | 2.78  | -4.50 | 1.78  | mmu-miR-877*    |
| 11001 | 0.74 | 3.34x10 <sup>-2</sup> | 2.77  | -4.50 | 0.84  | mmu-miR-29a     |
| 5537  | 0.74 | 3.38x10 <sup>-2</sup> | 2.76  | -4.50 | 1.20  | mmu-miR-741     |
| 2408  | 0.74 | 3.39x10 <sup>-2</sup> | 2.76  | -4.50 | 2.41  | mmu-miR-671-5p  |
| 14122 | 0.74 | 3.40x10 <sup>-2</sup> | 2.76  | -4.50 | 1.76  | mmu-miR-22*     |
| 11437 | 0.74 | 3.42x10 <sup>-2</sup> | 2.76  | -4.50 | 1.34  |                 |
| 3901  | 0.74 | 3.42x10 <sup>-2</sup> | 2.76  | -4.50 | 1.26  | mmu-miR-125b-5p |
| 2297  | 0.74 | 3.43x10 <sup>-2</sup> | 2.75  | -4.50 | 1.16  | mmu-miR-296-5p  |
| 3248  | 0.74 | 3.43x10 <sup>-2</sup> | 2.75  | -4.50 | 3.40  | mmu-miR-715     |
| 5219  | 0.74 | 3.51x10 <sup>-2</sup> | 2.74  | -4.51 | 4.10  |                 |
| 14762 | 0.74 | 3.53x10 <sup>-2</sup> | 2.73  | -4.51 | 0.72  | mmu-miR-103     |
| 7651  | 0.74 | 3.56x10 <sup>-2</sup> | 2.73  | -4.51 | 1.36  | mmu-miR-34b-5p  |
| 3974  | 0.74 | 3.58x10 <sup>-2</sup> | 2.72  | -4.51 | 0.80  | mmu-miR-25      |
| 4116  | 0.74 | 3.58x10 <sup>-2</sup> | 2.72  | -4.51 | 1.30  | mmu-miR-17*     |
| 7400  | 0.74 | 3.61x10 <sup>-2</sup> | 2.71  | -4.51 | 0.95  | mmu-miR-20a     |
| 12666 | 0.74 | 3.63x10 <sup>-2</sup> | -2.71 | -4.51 | -1.32 | mmu-miR-148a    |
| 855   | 0.74 | 3.63x10 <sup>-2</sup> | 2.71  | -4.51 | 1.36  | mmu-miR-125b-5p |
| 4440  | 0.74 | 3.66x10 <sup>-2</sup> | 2.70  | -4.51 | 0.87  | mmu-miR-374     |
| 7497  | 0.74 | 3.70x10 <sup>-2</sup> | 2.70  | -4.51 | 1.45  | mmu-miR-34a     |
| 8144  | 0.74 | 3.71x10 <sup>-2</sup> | 2.69  | -4.51 | 1.32  | mmu-miR-125b-5p |
| 5610  | 0.74 | 3.74x10 <sup>-2</sup> | 2.69  | -4.51 | 0.61  | mmu-miR-26a     |
| 2658  | 0.74 | 3.77x10 <sup>-2</sup> | 2.68  | -4.51 | 3.15  | mmu-miR-669n    |
| 107   | 0.74 | 3.78x10 <sup>-2</sup> | 2.68  | -4.51 | 0.97  | mmu-miR-93      |
| 13855 | 0.74 | 3.79x10 <sup>-2</sup> | 2.68  | -4.51 | 0.96  | mmu-let-7f*     |
| 215   | 0.74 | 3.80x10 <sup>-2</sup> | 2.68  | -4.51 | 1.44  | mmu-let-7b*     |
| 8582  | 0.74 | 3.82x10 <sup>-2</sup> | -2.67 | -4.51 | -1.31 | mmu-miR-335-3p  |
| 13317 | 0.74 | 3.85x10 <sup>-2</sup> | 2.66  | -4.51 | 1.29  | mmu-miR-34c     |
| 7780  | 0.74 | 3.86x10 <sup>-2</sup> | 2.66  | -4.51 | 2.30  | mmu-miR-34c*    |
| 13602 | 0.74 | 3.88x10 <sup>-2</sup> | 2.66  | -4.51 | 0.76  | mmu-miR-93      |
| 13072 | 0.74 | 3.90x10 <sup>-2</sup> | 2.65  | -4.51 | 1.34  | mmu-miR-125b-5p |
| 9799  | 0.74 | 3.91x10 <sup>-2</sup> | 2.65  | -4.51 | 0.76  | mmu-miR-29c     |
| 4091  | 0.74 | 3.92x10 <sup>-2</sup> | 2.65  | -4.51 | 0.79  | mmu-miR-140*    |

|       |      |                       |       |       |       |                 |
|-------|------|-----------------------|-------|-------|-------|-----------------|
| 10782 | 0.74 | 3.93x10 <sup>-2</sup> | 2.65  | -4.51 | 3.17  | mmu-miR-188-5p  |
| 14284 | 0.74 | 3.95x10 <sup>-2</sup> | 2.65  | -4.51 | 1.04  | mmu-miR-30d     |
| 10189 | 0.74 | 3.96x10 <sup>-2</sup> | -2.64 | -4.51 | -2.48 | mmu-miR-202-5p  |
| 4302  | 0.74 | 4.01x10 <sup>-2</sup> | 2.63  | -4.51 | 0.77  | mmu-miR-25      |
| 2623  | 0.74 | 4.09x10 <sup>-2</sup> | 2.62  | -4.51 | 1.42  | mmu-miR-125b-5p |
| 11968 | 0.74 | 4.09x10 <sup>-2</sup> | 2.62  | -4.51 | 1.46  | mmu-miR-125b-5p |
| 2357  | 0.74 | 4.15x10 <sup>-2</sup> | 2.61  | -4.51 | 1.05  | mmu-miR-191*    |
| 1398  | 0.74 | 4.15x10 <sup>-2</sup> | 2.61  | -4.51 | 0.77  | mmu-miR-29a     |
| 15589 | 0.74 | 4.17x10 <sup>-2</sup> | 2.60  | -4.51 | 1.98  | mmu-miR-34c     |
| 6757  | 0.74 | 4.19x10 <sup>-2</sup> | 2.60  | -4.51 | 0.60  | mmu-miR-350     |
| 11521 | 0.74 | 4.19x10 <sup>-2</sup> | 2.60  | -4.51 | 1.52  | mmu-miR-30c-2*  |
| 6460  | 0.74 | 4.21x10 <sup>-2</sup> | 2.60  | -4.51 | 0.59  | mmu-miR-25      |
| 4890  | 0.74 | 4.23x10 <sup>-2</sup> | 2.59  | -4.51 | 1.15  | mmu-miR-181b    |
| 9451  | 0.74 | 4.28x10 <sup>-2</sup> | 2.58  | -4.51 | 1.38  | mmu-miR-34c     |
| 12471 | 0.74 | 4.29x10 <sup>-2</sup> | 2.58  | -4.51 | 0.75  | mmu-miR-93      |
| 1842  | 0.74 | 4.40x10 <sup>-2</sup> | 2.56  | -4.51 | 2.78  | mmu-miR-574-5p  |
| 9081  | 0.74 | 4.42x10 <sup>-2</sup> | 2.56  | -4.51 | 2.85  |                 |
| 1752  | 0.74 | 4.43x10 <sup>-2</sup> | 2.56  | -4.51 | 1.57  | mmu-miR-484     |
| 9780  | 0.74 | 4.49x10 <sup>-2</sup> | 2.55  | -4.51 | 0.97  | mmu-miR-532-5p  |
| 8308  | 0.74 | 4.49x10 <sup>-2</sup> | 2.55  | -4.51 | 1.38  | mmu-miR-125b-5p |
| 8407  | 0.74 | 4.53x10 <sup>-2</sup> | -2.54 | -4.51 | -1.43 | mmu-miR-668     |
| 7203  | 0.74 | 4.55x10 <sup>-2</sup> | 2.54  | -4.51 | 1.25  | mmu-miR-125b-5p |
| 5602  | 0.74 | 4.56x10 <sup>-2</sup> | 2.54  | -4.51 | 0.96  | mmu-miR-181b    |
| 561   | 0.74 | 4.64x10 <sup>-2</sup> | -2.52 | -4.51 | -0.68 | mmu-miR-98      |
| 8749  | 0.74 | 4.64x10 <sup>-2</sup> | 2.52  | -4.51 | 3.41  | mmu-miR-1897-5p |
| 1294  | 0.74 | 4.66x10 <sup>-2</sup> | 2.52  | -4.51 | 0.68  | mmu-miR-31      |
| 4405  | 0.74 | 4.66x10 <sup>-2</sup> | -2.52 | -4.51 | -0.97 | mmu-miR-30c     |
| 1469  | 0.74 | 4.67x10 <sup>-2</sup> | -2.52 | -4.51 | -1.10 | mmu-miR-148a    |
| 10033 | 0.74 | 4.83x10 <sup>-2</sup> | 2.49  | -4.52 | 1.46  | mmu-miR-192     |
| 10625 | 0.74 | 4.84x10 <sup>-2</sup> | 2.49  | -4.52 | 2.52  | mmu-miR-694     |
| 9885  | 0.74 | 4.85x10 <sup>-2</sup> | 2.49  | -4.52 | 0.79  | mmu-miR-31      |
| 8879  | 0.74 | 4.86x10 <sup>-2</sup> | 2.49  | -4.52 | 0.84  | mmu-miR-93      |
| 10565 | 0.74 | 4.89x10 <sup>-2</sup> | 2.48  | -4.52 | 1.33  | mmu-miR-34a     |
| 1620  | 0.74 | 4.89x10 <sup>-2</sup> | 2.48  | -4.52 | 1.07  | mmu-miR-362-3p  |
| 10041 | 0.74 | 4.89x10 <sup>-2</sup> | 2.48  | -4.52 | 0.95  | mmu-miR-342-5p  |
| 13040 | 0.74 | 4.92x10 <sup>-2</sup> | 2.48  | -4.52 | 5.17  | mmu-miR-1224    |
| 11921 | 0.74 | 5.02x10 <sup>-2</sup> | 2.46  | -4.52 | 1.06  | mmu-miR-181b    |
| 5169  | 0.74 | 5.02x10 <sup>-2</sup> | 2.46  | -4.52 | 0.63  | mmu-miR-155     |
| 5139  | 0.74 | 5.02x10 <sup>-2</sup> | 2.46  | -4.52 | 1.44  | mmu-miR-298     |
| 3489  | 0.74 | 5.08x10 <sup>-2</sup> | 2.46  | -4.52 | 3.18  | mmu-miR-1895    |
| 3799  | 0.74 | 5.08x10 <sup>-2</sup> | 2.46  | -4.52 | 0.79  | mmu-miR-668     |
| 13165 | 0.74 | 5.12x10 <sup>-2</sup> | 2.45  | -4.52 | 1.08  | mmu-miR-193b    |
| 1306  | 0.74 | 5.18x10 <sup>-2</sup> | 2.44  | -4.52 | 0.80  | mmu-miR-690     |
| 6072  | 0.74 | 5.25x10 <sup>-2</sup> | 2.43  | -4.52 | 0.61  | mmu-miR-872     |
| 15554 | 0.74 | 5.27x10 <sup>-2</sup> | 2.43  | -4.52 | 1.23  | mmu-miR-140*    |
| 9526  | 0.74 | 5.29x10 <sup>-2</sup> | 2.43  | -4.52 | 0.91  | mmu-miR-29a     |

|       |      |                       |       |       |       |                   |
|-------|------|-----------------------|-------|-------|-------|-------------------|
| 12331 | 0.74 | $5.32 \times 10^{-2}$ | 2.42  | -4.52 | 0.62  | mmu-miR-185       |
| 5802  | 0.74 | $5.35 \times 10^{-2}$ | 2.42  | -4.52 | 0.55  | mmu-miR-296-5p    |
| 10147 | 0.74 | $5.36 \times 10^{-2}$ | -2.41 | -4.52 | -1.21 | mmu-miR-92b       |
| 13437 | 0.74 | $5.41 \times 10^{-2}$ | 2.41  | -4.52 | 1.45  | mmu-miR-92a       |
| 6404  | 0.74 | $5.41 \times 10^{-2}$ | 2.41  | -4.52 | 1.23  | mmu-miR-34a       |
| 186   | 0.74 | $5.42 \times 10^{-2}$ | -2.41 | -4.52 | -1.61 | mmu-miR-30e*      |
| 7513  | 0.74 | $5.44 \times 10^{-2}$ | -2.40 | -4.52 | -2.64 | mmu-miR-295       |
| 13101 | 0.74 | $5.52 \times 10^{-2}$ | 2.39  | -4.52 | 0.89  | mmu-miR-92a       |
| 13327 | 0.74 | $5.57 \times 10^{-2}$ | 2.39  | -4.52 | 1.33  | mmu-miR-34c       |
| 7534  | 0.74 | $5.59 \times 10^{-2}$ | 2.38  | -4.52 | 1.09  | mmu-miR-181b      |
| 842   | 0.74 | $5.59 \times 10^{-2}$ | 2.38  | -4.52 | 3.08  | mmu-miR-741       |
| 5076  | 0.74 | $5.67 \times 10^{-2}$ | 2.37  | -4.52 | 1.16  | mmu-miR-181b      |
| 4892  | 0.74 | $5.69 \times 10^{-2}$ | 2.37  | -4.52 | 3.73  | mcmv-miR-M23-1-5p |
| 8443  | 0.74 | $5.74 \times 10^{-2}$ | 2.36  | -4.52 | 1.28  | mmu-miR-34a       |
| 5831  | 0.74 | $5.82 \times 10^{-2}$ | 2.35  | -4.52 | 2.92  | mmu-miR-135a*     |
| 5763  | 0.74 | $5.83 \times 10^{-2}$ | 2.35  | -4.52 | 1.04  | mmu-miR-30d       |
| 8303  | 0.74 | $5.88 \times 10^{-2}$ | 2.35  | -4.52 | 0.67  | mmu-miR-872       |
| 11314 | 0.74 | $5.89 \times 10^{-2}$ | 2.34  | -4.52 | 0.62  | mmu-miR-103       |
| 7239  | 0.74 | $5.91 \times 10^{-2}$ | 2.34  | -4.52 | 1.20  | mmu-miR-181b      |
| 15078 | 0.74 | $5.92 \times 10^{-2}$ | -2.34 | -4.52 | -0.60 | mmu-miR-301a      |
| 8810  | 0.74 | $5.93 \times 10^{-2}$ | 2.34  | -4.52 | 3.16  | mmu-miR-1895      |
| 14901 | 0.74 | $5.94 \times 10^{-2}$ | 2.34  | -4.52 | 4.62  | mmu-miR-1224      |
| 10694 | 0.74 | $5.94 \times 10^{-2}$ | 2.34  | -4.52 | 0.65  | mmu-miR-350       |
| 10334 | 0.74 | $5.96 \times 10^{-2}$ | 2.34  | -4.52 | 1.09  | mmu-miR-1906      |
| 9298  | 0.74 | $5.97 \times 10^{-2}$ | 2.34  | -4.52 | 0.95  | mmu-miR-20a       |
| 5407  | 0.74 | $5.99 \times 10^{-2}$ | 2.33  | -4.52 | 0.88  | mmu-miR-93        |
| 11317 | 0.74 | $6.03 \times 10^{-2}$ | -2.33 | -4.52 | -1.07 | mmu-miR-668       |
| 14572 | 0.74 | $6.04 \times 10^{-2}$ | 2.33  | -4.52 | 5.16  | mmu-miR-1224      |
| 12156 | 0.74 | $6.06 \times 10^{-2}$ | 2.32  | -4.52 | 1.71  | mmu-miR-1894-3p   |
| 961   | 0.74 | $6.07 \times 10^{-2}$ | 2.32  | -4.52 | 1.13  | mmu-miR-181b      |
| 2514  | 0.74 | $6.08 \times 10^{-2}$ | 2.32  | -4.52 | 4.16  | mmu-miR-494       |
| 8127  | 0.74 | $6.12 \times 10^{-2}$ | 2.32  | -4.52 | 4.80  | mmu-miR-1224      |
| 749   | 0.74 | $6.14 \times 10^{-2}$ | 2.31  | -4.52 | 0.73  | mmu-miR-25        |
| 6250  | 0.74 | $6.14 \times 10^{-2}$ | 2.31  | -4.52 | 0.64  | mmu-miR-361       |
| 14772 | 0.74 | $6.15 \times 10^{-2}$ | 2.31  | -4.52 | 1.20  | mmu-miR-34a       |
| 4183  | 0.74 | $6.18 \times 10^{-2}$ | 2.31  | -4.52 | 4.49  | mmu-miR-1224      |
| 5434  | 0.74 | $6.20 \times 10^{-2}$ | 2.31  | -4.52 | 1.04  | mmu-miR-715       |
| 9609  | 0.74 | $6.21 \times 10^{-2}$ | 2.31  | -4.52 | 0.73  | mmu-miR-140*      |
| 7172  | 0.74 | $6.22 \times 10^{-2}$ | 2.30  | -4.52 | 1.97  | mmu-miR-1906      |
| 11794 | 0.74 | $6.25 \times 10^{-2}$ | -2.30 | -4.52 | -1.16 | mmu-miR-291b-3p   |
| 13    | 0.74 | $6.28 \times 10^{-2}$ | 2.30  | -4.52 | 1.96  | mmu-miR-1897-5p   |
| 530   | 0.74 | $6.35 \times 10^{-2}$ | 2.29  | -4.52 | 0.78  | mmu-miR-182       |
| 5908  | 0.74 | $6.36 \times 10^{-2}$ | 2.29  | -4.52 | 1.78  | mmu-miR-295       |
| 6175  | 0.74 | $6.44 \times 10^{-2}$ | 2.28  | -4.53 | 0.95  | mmu-miR-206       |
| 11957 | 0.74 | $6.47 \times 10^{-2}$ | -2.28 | -4.53 | -1.00 | mmu-miR-148a      |
| 12449 | 0.74 | $6.48 \times 10^{-2}$ | 2.27  | -4.53 | 1.06  | mmu-miR-181b      |

|       |      |                       |       |       |       |                 |
|-------|------|-----------------------|-------|-------|-------|-----------------|
| 13960 | 0.74 | $6.51 \times 10^{-2}$ | 2.27  | -4.53 | 0.53  | mmu-let-7e      |
| 13972 | 0.74 | $6.54 \times 10^{-2}$ | -2.27 | -4.53 | -1.75 |                 |
| 11885 | 0.74 | $6.54 \times 10^{-2}$ | -2.27 | -4.53 | -0.98 | mmu-miR-149     |
| 2301  | 0.74 | $6.57 \times 10^{-2}$ | 2.26  | -4.53 | 0.65  | mmu-miR-31      |
| 9980  | 0.74 | $6.58 \times 10^{-2}$ | 2.26  | -4.53 | 1.29  | mmu-miR-34a     |
| 14220 | 0.74 | $6.70 \times 10^{-2}$ | 2.25  | -4.53 | 0.87  | mmu-miR-21      |
| 11761 | 0.74 | $6.70 \times 10^{-2}$ | 2.25  | -4.53 | 1.26  | mmu-miR-1906    |
| 9210  | 0.74 | $6.70 \times 10^{-2}$ | -2.25 | -4.53 | -1.47 | mmu-miR-92a*    |
| 194   | 0.74 | $6.74 \times 10^{-2}$ | 2.24  | -4.53 | 0.74  | mmu-miR-125a-5p |
| 5398  | 0.74 | $6.75 \times 10^{-2}$ | 2.24  | -4.53 | 0.83  | mmu-miR-34b-5p  |
| 5091  | 0.74 | $6.75 \times 10^{-2}$ | 2.24  | -4.53 | 0.71  | mmu-miR-365     |
| 8761  | 0.74 | $6.76 \times 10^{-2}$ | 2.24  | -4.53 | 5.07  | mmu-miR-1224    |
| 4853  | 0.74 | $6.77 \times 10^{-2}$ | 2.24  | -4.53 | 4.45  | mmu-miR-1224    |
| 10608 | 0.74 | $6.81 \times 10^{-2}$ | 2.24  | -4.53 | 0.68  | mmu-miR-30d     |
| 8591  | 0.74 | $6.82 \times 10^{-2}$ | 2.24  | -4.53 | 1.25  | mmu-miR-34a     |
| 10627 | 0.74 | $6.82 \times 10^{-2}$ | 2.24  | -4.53 | 1.28  | mmu-miR-34a     |
| 5796  | 0.74 | $6.86 \times 10^{-2}$ | 2.23  | -4.53 | 0.89  | mmu-miR-30b*    |
| 5826  | 0.74 | $6.86 \times 10^{-2}$ | 2.23  | -4.53 | 1.00  |                 |
| 5358  | 0.74 | $6.88 \times 10^{-2}$ | 2.23  | -4.53 | 1.24  | mmu-miR-34a     |
| 9558  | 0.74 | $6.94 \times 10^{-2}$ | 2.22  | -4.53 | 1.24  | mmu-miR-34c     |
| 959   | 0.74 | $6.98 \times 10^{-2}$ | -2.22 | -4.53 | -1.67 | mmu-miR-30a*    |
| 7247  | 0.74 | $7.05 \times 10^{-2}$ | 2.21  | -4.53 | 0.68  | mmu-miR-140     |
| 972   | 0.74 | $7.05 \times 10^{-2}$ | 2.21  | -4.53 | 1.20  | mmu-miR-34c     |
| 13574 | 0.74 | $7.08 \times 10^{-2}$ | 2.21  | -4.53 | 1.30  | mmu-miR-449a    |
| 15458 | 0.74 | $7.09 \times 10^{-2}$ | 2.21  | -4.53 | 1.21  | mmu-miR-34c     |
| 15579 | 0.74 | $7.10 \times 10^{-2}$ | -2.21 | -4.53 | -0.67 |                 |
| 11110 | 0.74 | $7.15 \times 10^{-2}$ | 2.20  | -4.53 | 0.82  | mmu-miR-20a     |
| 7075  | 0.74 | $7.17 \times 10^{-2}$ | 2.20  | -4.53 | 0.91  | mmu-miR-19a     |
| 8132  | 0.74 | $7.18 \times 10^{-2}$ | 2.20  | -4.53 | 2.83  | mmu-miR-188-5p  |
| 4779  | 0.74 | $7.20 \times 10^{-2}$ | 2.20  | -4.53 | 1.28  | mmu-miR-30d     |
| 914   | 0.74 | $7.24 \times 10^{-2}$ | 2.19  | -4.53 | 0.78  | mmu-miR-21      |
| 12720 | 0.74 | $7.31 \times 10^{-2}$ | 2.19  | -4.53 | 0.61  | mmu-miR-183     |
| 3215  | 0.74 | $7.33 \times 10^{-2}$ | 2.18  | -4.53 | 2.61  | mmu-miR-125b-5p |
| 6547  | 0.74 | $7.34 \times 10^{-2}$ | 2.18  | -4.53 | 0.73  | mmu-miR-99b     |
| 1452  | 0.74 | $7.39 \times 10^{-2}$ | 2.18  | -4.53 | 0.69  | mmu-miR-25      |
| 5996  | 0.74 | $7.42 \times 10^{-2}$ | 2.17  | -4.53 | 0.66  | mmu-miR-532-5p  |
| 7783  | 0.74 | $7.43 \times 10^{-2}$ | 2.17  | -4.53 | 5.01  | mmu-miR-494     |
| 3113  | 0.74 | $7.52 \times 10^{-2}$ | 2.16  | -4.53 | 0.99  | mmu-miR-206     |
| 3032  | 0.74 | $7.55 \times 10^{-2}$ | 2.16  | -4.53 | 1.61  | mmu-miR-126-5p  |
| 5893  | 0.74 | $7.57 \times 10^{-2}$ | 2.16  | -4.53 | 0.70  | mmu-miR-181b    |
| 4390  | 0.74 | $7.66 \times 10^{-2}$ | 2.15  | -4.53 | 3.81  | mmu-miR-1224    |
| 4876  | 0.74 | $7.66 \times 10^{-2}$ | 2.15  | -4.53 | 1.43  | mmu-miR-296-5p  |
| 11562 | 0.74 | $7.68 \times 10^{-2}$ | 2.15  | -4.53 | 1.26  | mmu-miR-34c     |
| 2070  | 0.74 | $7.68 \times 10^{-2}$ | 2.15  | -4.53 | 0.62  | mmu-miR-31      |
| 1291  | 0.74 | $7.69 \times 10^{-2}$ | 2.15  | -4.53 | 3.77  | mmu-miR-1224    |
| 6549  | 0.74 | $7.70 \times 10^{-2}$ | 2.15  | -4.53 | 0.75  | mmu-miR-206     |

|       |      |                       |       |       |       |                 |
|-------|------|-----------------------|-------|-------|-------|-----------------|
| 8746  | 0.74 | $7.71 \times 10^{-2}$ | 2.15  | -4.53 | 0.76  | mmu-miR-190     |
| 11699 | 0.74 | $7.72 \times 10^{-2}$ | 2.14  | -4.53 | 0.71  | mmu-miR-25      |
| 8233  | 0.74 | $7.76 \times 10^{-2}$ | 2.14  | -4.53 | 4.43  | mmu-miR-1224    |
| 15177 | 0.74 | $7.81 \times 10^{-2}$ | 2.14  | -4.53 | 0.70  | mmu-miR-20a     |
| 7222  | 0.74 | $7.83 \times 10^{-2}$ | 2.13  | -4.53 | 0.80  | mmu-miR-21      |
| 15743 | 0.74 | $7.83 \times 10^{-2}$ | -2.13 | -4.53 | -0.65 |                 |
| 2276  | 0.74 | $7.86 \times 10^{-2}$ | 2.13  | -4.53 | 1.52  | mmu-miR-224     |
| 13514 | 0.74 | $7.88 \times 10^{-2}$ | 2.13  | -4.53 | 2.31  | mmu-miR-155     |
| 5543  | 0.74 | $7.88 \times 10^{-2}$ | 2.13  | -4.53 | 0.87  | mmu-miR-29b*    |
| 6842  | 0.74 | $7.90 \times 10^{-2}$ | 2.13  | -4.53 | 1.08  | mmu-miR-376a*   |
| 11413 | 0.74 | $7.92 \times 10^{-2}$ | 2.13  | -4.53 | 0.75  | mmu-miR-21      |
| 6949  | 0.74 | $7.95 \times 10^{-2}$ | 2.12  | -4.53 | 2.09  | mmu-miR-1897-5p |
| 1951  | 0.74 | $7.96 \times 10^{-2}$ | 2.12  | -4.53 | 1.02  | mmu-miR-20b     |
| 2868  | 0.74 | $7.98 \times 10^{-2}$ | 2.12  | -4.53 | 3.74  | mmu-miR-1224    |
| 12805 | 0.74 | $7.98 \times 10^{-2}$ | 2.12  | -4.53 | 0.71  | mmu-miR-92a     |
| 14768 | 0.74 | $8.02 \times 10^{-2}$ | 2.12  | -4.53 | 3.70  | mmu-miR-1224    |
| 14372 | 0.74 | $8.02 \times 10^{-2}$ | 2.12  | -4.53 | 0.73  | mmu-miR-93      |
| 5016  | 0.74 | $8.04 \times 10^{-2}$ | 2.12  | -4.53 | 2.16  | mmu-miR-743a    |
| 667   | 0.74 | $8.12 \times 10^{-2}$ | 2.11  | -4.53 | 0.79  | mmu-miR-20b     |
| 5919  | 0.74 | $8.15 \times 10^{-2}$ | 2.11  | -4.53 | 0.74  | mmu-miR-21      |
| 1866  | 0.74 | $8.18 \times 10^{-2}$ | 2.10  | -4.53 | 1.19  | mmu-miR-1906    |
| 5931  | 0.74 | $8.25 \times 10^{-2}$ | 2.10  | -4.53 | 1.17  | mmu-miR-324-3p  |
| 7072  | 0.74 | $8.25 \times 10^{-2}$ | 2.10  | -4.53 | 0.74  | mmu-miR-29c     |
| 12077 | 0.74 | $8.26 \times 10^{-2}$ | 2.10  | -4.53 | 0.80  | mmu-miR-21      |
| 9626  | 0.74 | $8.26 \times 10^{-2}$ | 2.10  | -4.53 | 1.15  | mmu-miR-34a     |
| 2548  | 0.74 | $8.26 \times 10^{-2}$ | 2.09  | -4.53 | 3.69  | mmu-miR-1224    |
| 10454 | 0.74 | $8.26 \times 10^{-2}$ | 2.09  | -4.53 | 1.62  | mmu-miR-20b     |
| 7211  | 0.74 | $8.29 \times 10^{-2}$ | 2.09  | -4.53 | 1.57  | mmu-miR-1897-5p |
| 11991 | 0.74 | $8.30 \times 10^{-2}$ | 2.09  | -4.53 | 4.34  | mmu-miR-1224    |
| 3827  | 0.74 | $8.32 \times 10^{-2}$ | 2.09  | -4.53 | 2.16  | mmu-miR-19a     |
| 6431  | 0.74 | $8.34 \times 10^{-2}$ | 2.09  | -4.53 | 1.15  | mmu-miR-125a-5p |
| 12354 | 0.74 | $8.34 \times 10^{-2}$ | 2.09  | -4.53 | 3.65  | mmu-miR-1224    |
| 7010  | 0.74 | $8.34 \times 10^{-2}$ | 2.09  | -4.53 | 3.73  | mmu-miR-1224    |
| 12378 | 0.74 | $8.35 \times 10^{-2}$ | 2.09  | -4.53 | 0.92  | mmu-miR-29a     |
| 6376  | 0.74 | $8.40 \times 10^{-2}$ | 2.08  | -4.54 | 2.07  | mmu-miR-574-5p  |
| 2904  | 0.74 | $8.40 \times 10^{-2}$ | 2.08  | -4.54 | 0.81  | mmu-miR-93      |
| 448   | 0.74 | $8.41 \times 10^{-2}$ | 2.08  | -4.54 | 1.30  | mmu-miR-709     |
| 7572  | 0.74 | $8.46 \times 10^{-2}$ | 2.08  | -4.54 | 1.57  | mmu-miR-193     |
| 1773  | 0.74 | $8.48 \times 10^{-2}$ | -2.08 | -4.54 | -0.68 | mmu-miR-31*     |
| 409   | 0.74 | $8.52 \times 10^{-2}$ | -2.07 | -4.54 | -1.37 |                 |
| 11426 | 0.74 | $8.53 \times 10^{-2}$ | -2.07 | -4.54 | -0.51 | mmu-miR-10b     |
| 13222 | 0.74 | $8.56 \times 10^{-2}$ | 2.07  | -4.54 | 1.02  | mmu-miR-34b-5p  |
| 4495  | 0.74 | $8.58 \times 10^{-2}$ | 2.07  | -4.54 | 3.63  | mmu-miR-1224    |
| 1087  | 0.74 | $8.58 \times 10^{-2}$ | 2.07  | -4.54 | 0.50  | mmu-miR-151-5p  |
| 5438  | 0.74 | $8.60 \times 10^{-2}$ | 2.07  | -4.54 | 1.52  | mmu-miR-590-3p  |
| 2957  | 0.74 | $8.63 \times 10^{-2}$ | 2.06  | -4.54 | 0.78  | mmu-miR-20b     |

|       |      |                       |       |       |       |                 |
|-------|------|-----------------------|-------|-------|-------|-----------------|
| 3303  | 0.74 | 8.66x10 <sup>-2</sup> | 2.06  | -4.54 | 0.78  | mmu-miR-31      |
| 13371 | 0.74 | 8.69x10 <sup>-2</sup> | 2.06  | -4.54 | 0.55  | mmu-miR-29c     |
| 14672 | 0.74 | 8.70x10 <sup>-2</sup> | 2.06  | -4.54 | 0.93  | mmu-miR-181b    |
| 11421 | 0.74 | 8.71x10 <sup>-2</sup> | 2.06  | -4.54 | 3.58  | mmu-miR-1224    |
| 10309 | 0.74 | 8.80x10 <sup>-2</sup> | 2.05  | -4.54 | 3.62  | mmu-miR-1224    |
| 15608 | 0.74 | 8.87x10 <sup>-2</sup> | 2.04  | -4.54 | 1.05  | mmu-miR-467e    |
| 13703 | 0.74 | 8.89x10 <sup>-2</sup> | 2.04  | -4.54 | 1.22  | mmu-miR-34a     |
| 10568 | 0.74 | 8.92x10 <sup>-2</sup> | 2.04  | -4.54 | 5.47  | mmu-miR-494     |
| 14547 | 0.74 | 8.92x10 <sup>-2</sup> | 2.04  | -4.54 | 0.65  |                 |
| 14465 | 0.74 | 9.00x10 <sup>-2</sup> | -2.03 | -4.54 | -0.89 | mmu-miR-191*    |
| 5974  | 0.74 | 9.02x10 <sup>-2</sup> | 2.03  | -4.54 | 1.19  | mmu-miR-449a    |
| 11568 | 0.74 | 9.02x10 <sup>-2</sup> | 2.03  | -4.54 | 3.96  | mmu-miR-494     |
| 15510 | 0.74 | 9.03x10 <sup>-2</sup> | 2.03  | -4.54 | 0.56  | mmu-miR-31      |
| 6424  | 0.74 | 9.12x10 <sup>-2</sup> | 2.02  | -4.54 | 0.64  | mmu-miR-99b     |
| 12825 | 0.74 | 9.14x10 <sup>-2</sup> | -2.02 | -4.54 | -1.12 | mmu-miR-130b    |
| 3374  | 0.74 | 9.17x10 <sup>-2</sup> | 2.02  | -4.54 | 1.60  | mmu-miR-93      |
| 10947 | 0.74 | 9.26x10 <sup>-2</sup> | 2.01  | -4.54 | 0.67  | mmu-miR-674*    |
| 3393  | 0.74 | 9.27x10 <sup>-2</sup> | 2.01  | -4.54 | 0.55  | mmu-miR-500     |
| 3735  | 0.74 | 9.28x10 <sup>-2</sup> | 2.01  | -4.54 | 0.78  |                 |
| 7903  | 0.74 | 9.29x10 <sup>-2</sup> | 2.01  | -4.54 | 0.75  | mmu-miR-21      |
| 14085 | 0.74 | 9.31x10 <sup>-2</sup> | -2.01 | -4.54 | -1.31 | mghv-miR-M1-4   |
| 12383 | 0.74 | 9.32x10 <sup>-2</sup> | 2.01  | -4.54 | 0.51  | mmu-miR-25      |
| 1796  | 0.74 | 9.33x10 <sup>-2</sup> | 2.01  | -4.54 | 0.56  | mmu-miR-155     |
| 2888  | 0.74 | 9.36x10 <sup>-2</sup> | 2.00  | -4.54 | 2.40  | mmu-miR-574-5p  |
| 15497 | 0.74 | 9.37x10 <sup>-2</sup> | 2.00  | -4.54 | 0.98  |                 |
| 11318 | 0.74 | 9.42x10 <sup>-2</sup> | 2.00  | -4.54 | 0.68  | mmu-miR-29c     |
| 2626  | 0.74 | 9.42x10 <sup>-2</sup> | 2.00  | -4.54 | 1.19  | mmu-miR-34a     |
| 4203  | 0.74 | 9.44x10 <sup>-2</sup> | -2.00 | -4.54 | -1.72 | mmu-miR-190b    |
| 3524  | 0.74 | 9.45x10 <sup>-2</sup> | 2.00  | -4.54 | 0.67  | mmu-miR-21      |
| 15572 | 0.74 | 9.46x10 <sup>-2</sup> | -2.00 | -4.54 | -4.08 | mmu-miR-335-3p  |
| 9281  | 0.74 | 9.49x10 <sup>-2</sup> | 1.99  | -4.54 | 0.77  | mmu-miR-21      |
| 11772 | 0.74 | 9.59x10 <sup>-2</sup> | 1.99  | -4.54 | 0.83  | mmu-miR-193     |
| 919   | 0.74 | 9.60x10 <sup>-2</sup> | 1.98  | -4.54 | 1.47  | mmu-miR-18a     |
| 10692 | 0.74 | 9.61x10 <sup>-2</sup> | 1.98  | -4.54 | 0.80  | mmu-miR-185     |
| 2133  | 0.74 | 9.62x10 <sup>-2</sup> | 1.98  | -4.54 | 1.10  | mmu-miR-30b*    |
| 15450 | 0.74 | 9.70x10 <sup>-2</sup> | 1.98  | -4.54 | 1.28  | mmu-miR-135a    |
| 12743 | 0.74 | 9.71x10 <sup>-2</sup> | 1.98  | -4.54 | 0.73  | mmu-miR-29a     |
| 5087  | 0.74 | 9.71x10 <sup>-2</sup> | 1.98  | -4.54 | 0.66  | mmu-miR-31      |
| 9800  | 0.74 | 9.75x10 <sup>-2</sup> | 1.97  | -4.54 | 1.02  | mmu-miR-20b     |
| 1232  | 0.74 | 9.81x10 <sup>-2</sup> | 1.97  | -4.54 | 0.70  | mmu-miR-25      |
| 7762  | 0.74 | 9.81x10 <sup>-2</sup> | -1.97 | -4.54 | -1.11 | mmu-miR-30b*    |
| 9895  | 0.74 | 9.83x10 <sup>-2</sup> | 1.97  | -4.54 | 2.08  | mmu-miR-188-5p  |
| 1264  | 0.74 | 9.85x10 <sup>-2</sup> | 1.97  | -4.54 | 1.34  | mmu-miR-290-3p  |
| 6571  | 0.74 | 9.86x10 <sup>-2</sup> | 1.97  | -4.54 | 0.66  | mmu-miR-183     |
| 14554 | 0.74 | 9.88x10 <sup>-2</sup> | 1.96  | -4.54 | 0.72  | mmu-miR-21      |
| 1888  | 0.74 | 9.89x10 <sup>-2</sup> | 1.96  | -4.54 | 0.45  | mmu-miR-125a-5p |

|       |      |                       |       |       |       |                |
|-------|------|-----------------------|-------|-------|-------|----------------|
| 5175  | 0.74 | $9.91 \times 10^{-2}$ | 1.96  | -4.54 | 1.18  | mmu-miR-34a    |
| 14638 | 0.74 | $9.95 \times 10^{-2}$ | 1.96  | -4.54 | 1.71  | mmu-miR-128    |
| 5382  | 0.74 | $9.98 \times 10^{-2}$ | 1.96  | -4.54 | 1.63  | mmu-miR-190b   |
| 12287 | 0.74 | $1.00 \times 10^{-1}$ | -1.96 | -4.54 | -1.43 | mmu-miR-100    |
| 2445  | 0.74 | $1.00 \times 10^{-1}$ | 1.95  | -4.54 | 1.27  | mmu-miR-34c    |
| 4803  | 0.74 | $1.00 \times 10^{-1}$ | 1.95  | -4.54 | 0.77  | mmu-miR-93     |
| 4012  | 0.74 | $1.00 \times 10^{-1}$ | 1.95  | -4.54 | 1.37  | mmu-miR-449a   |
| 13906 | 0.74 | $1.01 \times 10^{-1}$ | 1.95  | -4.54 | 0.72  | mmu-miR-20b    |
| 1928  | 0.74 | $1.01 \times 10^{-1}$ | 1.95  | -4.54 | 0.72  | mmu-miR-130b   |
| 9857  | 0.74 | $1.01 \times 10^{-1}$ | -1.95 | -4.54 | -0.75 | mmu-miR-192    |
| 14647 | 0.74 | $1.01 \times 10^{-1}$ | 1.95  | -4.54 | 1.20  | mmu-miR-709    |
| 13447 | 0.74 | $1.01 \times 10^{-1}$ | 1.95  | -4.54 | 3.66  | mmu-miR-494    |
| 11689 | 0.74 | $1.02 \times 10^{-1}$ | 1.94  | -4.54 | 4.46  | mmu-miR-1224   |
| 9991  | 0.74 | $1.02 \times 10^{-1}$ | 1.94  | -4.54 | 3.71  | mmu-miR-494    |
| 3736  | 0.74 | $1.02 \times 10^{-1}$ | 1.94  | -4.54 | 0.79  | mmu-miR-21     |
| 14980 | 0.74 | $1.02 \times 10^{-1}$ | 1.94  | -4.54 | 0.85  | mmu-miR-449a   |
| 10445 | 0.74 | $1.02 \times 10^{-1}$ | 1.94  | -4.54 | 0.60  | mmu-miR-31     |
| 926   | 0.74 | $1.02 \times 10^{-1}$ | 1.94  | -4.54 | 0.56  | mmu-miR-31     |
| 6503  | 0.74 | $1.02 \times 10^{-1}$ | 1.94  | -4.54 | 0.66  | mmu-let-7b*    |
| 2117  | 0.74 | $1.02 \times 10^{-1}$ | 1.94  | -4.54 | 3.76  | mmu-miR-494    |
| 3626  | 0.74 | $1.03 \times 10^{-1}$ | 1.94  | -4.54 | 1.55  | mmu-let-7b*    |
| 7482  | 0.74 | $1.03 \times 10^{-1}$ | 1.94  | -4.54 | 1.16  | mmu-miR-709    |
| 13097 | 0.74 | $1.03 \times 10^{-1}$ | -1.94 | -4.54 | -1.14 | mmu-miR-190b   |
| 6525  | 0.74 | $1.03 \times 10^{-1}$ | 1.93  | -4.54 | 1.94  | mmu-miR-17*    |
| 3178  | 0.74 | $1.03 \times 10^{-1}$ | 1.93  | -4.54 | 0.63  | mmu-miR-25     |
| 14933 | 0.74 | $1.03 \times 10^{-1}$ | 1.93  | -4.54 | 2.98  | mmu-miR-135a*  |
| 3842  | 0.74 | $1.03 \times 10^{-1}$ | 1.93  | -4.54 | 0.80  | mmu-miR-25     |
| 7410  | 0.74 | $1.04 \times 10^{-1}$ | 1.93  | -4.54 | 0.80  | mmu-miR-20a    |
| 12858 | 0.74 | $1.04 \times 10^{-1}$ | 1.93  | -4.54 | 0.48  | mmu-miR-22     |
| 3878  | 0.74 | $1.04 \times 10^{-1}$ | 1.93  | -4.54 | 1.34  | mmu-miR-101b   |
| 14576 | 0.74 | $1.04 \times 10^{-1}$ | 1.93  | -4.54 | 0.73  | mmu-miR-30d    |
| 15580 | 0.74 | $1.04 \times 10^{-1}$ | -1.93 | -4.54 | -0.62 |                |
| 14252 | 0.74 | $1.04 \times 10^{-1}$ | 1.93  | -4.54 | 0.59  | mmu-miR-99b    |
| 9744  | 0.74 | $1.05 \times 10^{-1}$ | 1.92  | -4.54 | 4.65  | mmu-miR-494    |
| 7039  | 0.74 | $1.05 \times 10^{-1}$ | 1.92  | -4.54 | 0.61  | mmu-miR-25     |
| 9077  | 0.74 | $1.05 \times 10^{-1}$ | 1.92  | -4.54 | 0.97  | mmu-miR-193b   |
| 7471  | 0.74 | $1.05 \times 10^{-1}$ | 1.92  | -4.54 | 0.73  | mmu-miR-21     |
| 12855 | 0.74 | $1.05 \times 10^{-1}$ | 1.92  | -4.54 | 0.75  | mmu-miR-31     |
| 5774  | 0.74 | $1.05 \times 10^{-1}$ | 1.92  | -4.54 | 1.74  | mmu-miR-425*   |
| 15718 | 0.74 | $1.06 \times 10^{-1}$ | -1.92 | -4.54 | -1.58 | mmu-miR-211    |
| 12413 | 0.74 | $1.06 \times 10^{-1}$ | -1.92 | -4.54 | -1.48 | mmu-miR-483*   |
| 7891  | 0.74 | $1.06 \times 10^{-1}$ | 1.91  | -4.54 | 2.06  | mmu-miR-1895   |
| 4118  | 0.74 | $1.06 \times 10^{-1}$ | 1.91  | -4.54 | 0.71  | mmu-miR-331-3p |
| 15575 | 0.74 | $1.06 \times 10^{-1}$ | 1.91  | -4.54 | 2.27  | mmu-miR-139-5p |
| 13762 | 0.74 | $1.07 \times 10^{-1}$ | 1.91  | -4.54 | 0.49  | mmu-miR-532-5p |
| 12117 | 0.74 | $1.08 \times 10^{-1}$ | 1.90  | -4.54 | 1.01  | mmu-miR-149    |

|       |      |                       |       |       |       |                 |
|-------|------|-----------------------|-------|-------|-------|-----------------|
| 5208  | 0.74 | $1.08 \times 10^{-1}$ | 1.90  | -4.54 | 1.21  | mmu-miR-34a     |
| 8574  | 0.74 | $1.08 \times 10^{-1}$ | 1.90  | -4.54 | 0.77  | mmu-miR-29a     |
| 12088 | 0.74 | $1.08 \times 10^{-1}$ | 1.90  | -4.54 | 1.18  | mmu-miR-34a     |
| 10577 | 0.74 | $1.08 \times 10^{-1}$ | 1.90  | -4.55 | 1.89  | mmu-miR-1906    |
| 6083  | 0.74 | $1.09 \times 10^{-1}$ | 1.90  | -4.55 | 0.52  | mmu-miR-676     |
| 3469  | 0.74 | $1.09 \times 10^{-1}$ | 1.89  | -4.55 | 0.71  | mmu-miR-21      |
| 3814  | 0.74 | $1.09 \times 10^{-1}$ | 1.89  | -4.55 | 0.68  |                 |
| 15271 | 0.74 | $1.09 \times 10^{-1}$ | 1.89  | -4.55 | 1.43  | mmu-miR-872     |
| 10660 | 0.74 | $1.09 \times 10^{-1}$ | 1.89  | -4.55 | 1.66  | mmu-miR-17*     |
| 6674  | 0.74 | $1.09 \times 10^{-1}$ | 1.89  | -4.55 | 0.71  | mmu-miR-21      |
| 13858 | 0.74 | $1.10 \times 10^{-1}$ | 1.89  | -4.55 | 3.56  | mmu-miR-494     |
| 320   | 0.74 | $1.10 \times 10^{-1}$ | 1.89  | -4.55 | 0.62  | mmu-miR-151-5p  |
| 7578  | 0.74 | $1.10 \times 10^{-1}$ | 1.88  | -4.55 | 2.57  | mmu-miR-340-3p  |
| 2588  | 0.74 | $1.10 \times 10^{-1}$ | 1.88  | -4.55 | 0.46  | mmu-miR-149     |
| 4885  | 0.74 | $1.11 \times 10^{-1}$ | 1.88  | -4.55 | 1.84  | mmu-miR-1897-5p |
| 15089 | 0.74 | $1.11 \times 10^{-1}$ | 1.88  | -4.55 | 1.62  | mmu-miR-201     |
| 15744 | 0.74 | $1.11 \times 10^{-1}$ | -1.88 | -4.55 | -0.56 |                 |
| 11618 | 0.74 | $1.11 \times 10^{-1}$ | -1.88 | -4.55 | -1.52 | mmu-miR-26b     |
| 6565  | 0.74 | $1.11 \times 10^{-1}$ | 1.88  | -4.55 | 0.92  | mmu-miR-298     |
| 10363 | 0.74 | $1.12 \times 10^{-1}$ | 1.88  | -4.55 | 0.63  | mmu-miR-31      |
| 8699  | 0.74 | $1.12 \times 10^{-1}$ | 1.87  | -4.55 | 0.42  | mmu-miR-125a-5p |
| 13596 | 0.74 | $1.12 \times 10^{-1}$ | 1.87  | -4.55 | 0.80  | mmu-miR-31      |
| 7326  | 0.74 | $1.12 \times 10^{-1}$ | 1.87  | -4.55 | 0.65  | mmu-miR-449a    |
| 6158  | 0.74 | $1.12 \times 10^{-1}$ | 1.87  | -4.55 | 3.76  | mmu-miR-494     |
| 15213 | 0.74 | $1.12 \times 10^{-1}$ | 1.87  | -4.55 | 0.99  | mmu-miR-702     |
| 4444  | 0.74 | $1.12 \times 10^{-1}$ | 1.87  | -4.55 | 0.68  | mmu-miR-29b*    |
| 2436  | 0.74 | $1.13 \times 10^{-1}$ | 1.87  | -4.55 | 0.75  | mmu-miR-93      |
| 7079  | 0.74 | $1.13 \times 10^{-1}$ | 1.87  | -4.55 | 1.74  |                 |
| 3576  | 0.74 | $1.13 \times 10^{-1}$ | 1.86  | -4.55 | 1.64  | mcmv-miR-m88-1* |
| 3721  | 0.74 | $1.14 \times 10^{-1}$ | 1.86  | -4.55 | 0.72  | mmu-miR-92a     |
| 13592 | 0.74 | $1.14 \times 10^{-1}$ | 1.86  | -4.55 | 0.88  | mmu-miR-29a     |
| 6895  | 0.74 | $1.14 \times 10^{-1}$ | 1.86  | -4.55 | 1.11  | mmu-miR-206     |
| 605   | 0.74 | $1.14 \times 10^{-1}$ | 1.86  | -4.55 | 1.66  | mmu-miR-676     |
| 3146  | 0.74 | $1.14 \times 10^{-1}$ | 1.86  | -4.55 | 0.73  | mmu-miR-21      |
| 8744  | 0.74 | $1.15 \times 10^{-1}$ | 1.85  | -4.55 | 0.42  | mmu-miR-350     |
| 13157 | 0.74 | $1.15 \times 10^{-1}$ | 1.85  | -4.55 | 0.74  | mmu-miR-182     |
| 2936  | 0.74 | $1.15 \times 10^{-1}$ | 1.85  | -4.55 | 1.06  | mmu-miR-128     |
| 1334  | 0.74 | $1.15 \times 10^{-1}$ | -1.85 | -4.55 | -0.56 | mmu-miR-27b     |
| 3378  | 0.74 | $1.15 \times 10^{-1}$ | 1.85  | -4.55 | 1.26  | mmu-miR-668     |
| 9463  | 0.74 | $1.15 \times 10^{-1}$ | 1.85  | -4.55 | 2.83  | mmu-miR-320     |
| 6299  | 0.74 | $1.15 \times 10^{-1}$ | -1.85 | -4.55 | -1.59 | mmu-miR-221     |
| 12530 | 0.74 | $1.16 \times 10^{-1}$ | 1.85  | -4.55 | 0.61  | mmu-miR-16      |
| 3561  | 0.74 | $1.16 \times 10^{-1}$ | 1.85  | -4.55 | 0.73  | mmu-miR-92a     |
| 12424 | 0.74 | $1.17 \times 10^{-1}$ | 1.84  | -4.55 | 0.43  | mmu-miR-30d     |
| 5786  | 0.74 | $1.17 \times 10^{-1}$ | 1.84  | -4.55 | 0.82  | mmu-miR-29a     |
| 4560  | 0.74 | $1.17 \times 10^{-1}$ | 1.84  | -4.55 | 4.24  | mmu-miR-1187    |



|       |      |                       |       |       |       |                 |
|-------|------|-----------------------|-------|-------|-------|-----------------|
| 9157  | 0.74 | 1.17x10 <sup>-1</sup> | 1.84  | -4.55 | 1.73  | mmu-miR-206     |
| 463   | 0.74 | 1.18x10 <sup>-1</sup> | -1.84 | -4.55 | -0.67 | mmu-miR-223     |
| 5792  | 0.74 | 1.18x10 <sup>-1</sup> | 1.84  | -4.55 | 1.53  | mmu-miR-1895    |
| 9702  | 0.74 | 1.18x10 <sup>-1</sup> | 1.84  | -4.55 | 0.69  | mmu-miR-182     |
| 3884  | 0.74 | 1.18x10 <sup>-1</sup> | 1.84  | -4.55 | 0.56  | mmu-miR-210     |
| 4467  | 0.74 | 1.18x10 <sup>-1</sup> | 1.83  | -4.55 | 0.80  | mmu-miR-29a     |
| 11151 | 0.74 | 1.19x10 <sup>-1</sup> | 1.83  | -4.55 | 0.92  | mmu-miR-484     |
| 12223 | 0.74 | 1.19x10 <sup>-1</sup> | 1.83  | -4.55 | 0.53  | mmu-miR-106b    |
| 7628  | 0.74 | 1.20x10 <sup>-1</sup> | 1.82  | -4.55 | 0.64  | mmu-miR-872     |
| 5020  | 0.74 | 1.21x10 <sup>-1</sup> | 1.81  | -4.55 | 0.66  | mmu-miR-296-5p  |
| 3330  | 0.74 | 1.22x10 <sup>-1</sup> | 1.81  | -4.55 | 2.02  | mmu-miR-1187    |
| 12301 | 0.74 | 1.22x10 <sup>-1</sup> | -1.81 | -4.55 | -1.62 | mmu-miR-148a    |
| 12564 | 0.74 | 1.22x10 <sup>-1</sup> | 1.81  | -4.55 | 0.75  | mmu-miR-29a     |
| 6048  | 0.74 | 1.23x10 <sup>-1</sup> | 1.81  | -4.55 | 0.52  | mmu-miR-28      |
| 3471  | 0.74 | 1.23x10 <sup>-1</sup> | 1.80  | -4.55 | 1.62  | mmu-miR-7a      |
| 4060  | 0.74 | 1.23x10 <sup>-1</sup> | 1.80  | -4.55 | 0.74  | mmu-miR-21      |
| 184   | 0.74 | 1.23x10 <sup>-1</sup> | -1.80 | -4.55 | -1.61 | mmu-miR-190b    |
| 5135  | 0.74 | 1.23x10 <sup>-1</sup> | 1.80  | -4.55 | 0.82  | mmu-miR-29a     |
| 10891 | 0.74 | 1.24x10 <sup>-1</sup> | -1.80 | -4.55 | -0.41 | mmu-miR-30c     |
| 3018  | 0.74 | 1.24x10 <sup>-1</sup> | 1.80  | -4.55 | 1.33  |                 |
| 10224 | 0.74 | 1.24x10 <sup>-1</sup> | 1.80  | -4.55 | 0.68  | mmu-miR-29a     |
| 13645 | 0.74 | 1.25x10 <sup>-1</sup> | 1.79  | -4.55 | 0.75  | mmu-miR-29a     |
| 1720  | 0.74 | 1.25x10 <sup>-1</sup> | 1.79  | -4.55 | 0.71  | mmu-miR-29a     |
| 11600 | 0.74 | 1.25x10 <sup>-1</sup> | 1.79  | -4.55 | 0.74  | mmu-miR-21      |
| 2645  | 0.74 | 1.25x10 <sup>-1</sup> | 1.79  | -4.55 | 0.47  | mmu-miR-210     |
| 3318  | 0.74 | 1.25x10 <sup>-1</sup> | 1.79  | -4.55 | 0.59  | mmu-miR-99b     |
| 6655  | 0.74 | 1.25x10 <sup>-1</sup> | 1.79  | -4.55 | 0.60  | mmu-miR-99b     |
| 14475 | 0.74 | 1.25x10 <sup>-1</sup> | 1.79  | -4.55 | 0.77  | mmu-miR-25      |
| 10145 | 0.74 | 1.25x10 <sup>-1</sup> | 1.79  | -4.55 | 0.78  | mmu-miR-20b     |
| 11686 | 0.74 | 1.26x10 <sup>-1</sup> | 1.79  | -4.55 | 0.64  | mmu-miR-31      |
| 11972 | 0.74 | 1.26x10 <sup>-1</sup> | 1.79  | -4.55 | 1.17  | mmu-miR-34a     |
| 5615  | 0.74 | 1.26x10 <sup>-1</sup> | 1.79  | -4.55 | 1.10  | mmu-miR-34b-5p  |
| 12356 | 0.74 | 1.27x10 <sup>-1</sup> | 1.78  | -4.55 | 0.70  | mmu-miR-92a     |
| 14830 | 0.74 | 1.27x10 <sup>-1</sup> | -1.78 | -4.55 | -2.17 | mmu-miR-186     |
| 11648 | 0.74 | 1.27x10 <sup>-1</sup> | 1.78  | -4.55 | 0.41  | mmu-let-7e      |
| 13213 | 0.74 | 1.27x10 <sup>-1</sup> | 1.78  | -4.55 | 0.53  | mmu-miR-151-5p  |
| 8686  | 0.74 | 1.27x10 <sup>-1</sup> | 1.78  | -4.55 | 0.73  | mmu-miR-29a     |
| 15179 | 0.74 | 1.28x10 <sup>-1</sup> | -1.78 | -4.55 | -1.43 | mmu-miR-27b     |
| 549   | 0.74 | 1.28x10 <sup>-1</sup> | -1.78 | -4.55 | -0.83 | mmu-miR-465a-3p |
| 14418 | 0.74 | 1.28x10 <sup>-1</sup> | 1.77  | -4.55 | 0.73  | mmu-miR-29a     |
| 7178  | 0.74 | 1.29x10 <sup>-1</sup> | -1.77 | -4.55 | -1.45 | mmu-miR-201     |
| 3765  | 0.74 | 1.29x10 <sup>-1</sup> | 1.77  | -4.55 | 2.00  | mmu-miR-135a*   |
| 9405  | 0.74 | 1.30x10 <sup>-1</sup> | 1.77  | -4.55 | 0.58  | mmu-miR-182     |
| 5681  | 0.74 | 1.30x10 <sup>-1</sup> | 1.76  | -4.55 | 0.59  | mmu-miR-193b    |
| 4896  | 0.74 | 1.30x10 <sup>-1</sup> | 1.76  | -4.55 | 1.31  | mmu-miR-721     |
| 6523  | 0.74 | 1.31x10 <sup>-1</sup> | 1.76  | -4.55 | 0.63  | mmu-miR-31      |

|       |      |                       |       |       |       |                 |
|-------|------|-----------------------|-------|-------|-------|-----------------|
| 1592  | 0.74 | 1.31x10 <sup>-1</sup> | 1.76  | -4.55 | 1.70  | mmu-miR-574-5p  |
| 2703  | 0.74 | 1.31x10 <sup>-1</sup> | 1.76  | -4.55 | 1.05  | mmu-miR-29c     |
| 7674  | 0.74 | 1.31x10 <sup>-1</sup> | 1.76  | -4.55 | 0.43  | mmu-miR-500     |
| 8340  | 0.74 | 1.32x10 <sup>-1</sup> | 1.75  | -4.55 | 0.56  | mmu-miR-365     |
| 639   | 0.74 | 1.32x10 <sup>-1</sup> | 1.75  | -4.55 | 0.72  |                 |
| 145   | 0.74 | 1.32x10 <sup>-1</sup> | 1.75  | -4.55 | 0.47  | mmu-miR-23a     |
| 2161  | 0.74 | 1.33x10 <sup>-1</sup> | -1.75 | -4.55 | -1.79 | mmu-miR-145*    |
| 10001 | 0.74 | 1.33x10 <sup>-1</sup> | 1.75  | -4.55 | 0.62  | mmu-miR-93      |
| 9865  | 0.74 | 1.33x10 <sup>-1</sup> | 1.75  | -4.55 | 1.69  | mmu-miR-186     |
| 10626 | 0.74 | 1.33x10 <sup>-1</sup> | -1.75 | -4.55 | -0.63 | mmu-miR-497     |
| 12325 | 0.74 | 1.33x10 <sup>-1</sup> | -1.74 | -4.55 | -1.81 | mmu-miR-223     |
| 5583  | 0.74 | 1.33x10 <sup>-1</sup> | 1.74  | -4.55 | 1.44  | mmu-miR-743a    |
| 13117 | 0.74 | 1.34x10 <sup>-1</sup> | -1.74 | -4.55 | -1.39 | mmu-miR-298     |
| 492   | 0.74 | 1.34x10 <sup>-1</sup> | -1.74 | -4.55 | -1.76 | mmu-miR-27b*    |
| 5793  | 0.74 | 1.34x10 <sup>-1</sup> | 1.74  | -4.55 | 1.19  | mmu-miR-484     |
| 10048 | 0.74 | 1.35x10 <sup>-1</sup> | 1.74  | -4.55 | 0.64  | mmu-miR-193b    |
| 6243  | 0.74 | 1.35x10 <sup>-1</sup> | 1.74  | -4.55 | 1.07  | mmu-miR-34b-5p  |
| 15549 | 0.74 | 1.35x10 <sup>-1</sup> | 1.74  | -4.55 | 0.69  | mmu-miR-92a     |
| 8386  | 0.74 | 1.35x10 <sup>-1</sup> | 1.73  | -4.55 | 4.18  | mmu-miR-320     |
| 7532  | 0.74 | 1.35x10 <sup>-1</sup> | -1.73 | -4.55 | -1.62 | mmu-miR-539     |
| 8484  | 0.74 | 1.36x10 <sup>-1</sup> | 1.73  | -4.55 | 0.62  | mmu-miR-130b*   |
| 11840 | 0.74 | 1.36x10 <sup>-1</sup> | 1.73  | -4.55 | 1.23  | mmu-miR-196b    |
| 13517 | 0.74 | 1.36x10 <sup>-1</sup> | 1.73  | -4.55 | 1.28  | mmu-miR-298     |
| 4695  | 0.74 | 1.37x10 <sup>-1</sup> | 1.73  | -4.55 | 0.77  | mmu-miR-206     |
| 5387  | 0.74 | 1.38x10 <sup>-1</sup> | -1.72 | -4.55 | -0.74 | mmu-miR-30a*    |
| 5497  | 0.74 | 1.38x10 <sup>-1</sup> | 1.72  | -4.55 | 0.63  | mmu-miR-151-5p  |
| 2759  | 0.74 | 1.39x10 <sup>-1</sup> | 1.72  | -4.56 | 0.75  | mmu-miR-19b     |
| 7412  | 0.74 | 1.39x10 <sup>-1</sup> | -1.71 | -4.56 | -0.85 | mmu-miR-31*     |
| 5420  | 0.74 | 1.39x10 <sup>-1</sup> | 1.71  | -4.56 | 0.81  | mmu-miR-140*    |
| 12599 | 0.74 | 1.39x10 <sup>-1</sup> | 1.71  | -4.56 | 0.73  | mmu-miR-21      |
| 15045 | 0.74 | 1.40x10 <sup>-1</sup> | 1.71  | -4.56 | 0.83  | mmu-miR-20a     |
| 6459  | 0.74 | 1.40x10 <sup>-1</sup> | 1.71  | -4.56 | 0.61  | mmu-miR-31      |
| 3472  | 0.74 | 1.40x10 <sup>-1</sup> | 1.71  | -4.56 | 0.81  | mmu-miR-20a     |
| 13077 | 0.74 | 1.40x10 <sup>-1</sup> | 1.71  | -4.56 | 0.65  | mmu-miR-19b     |
| 13476 | 0.74 | 1.41x10 <sup>-1</sup> | 1.71  | -4.56 | 1.89  | mmu-miR-574-5p  |
| 1774  | 0.74 | 1.41x10 <sup>-1</sup> | 1.70  | -4.56 | 1.08  | mmu-miR-715     |
| 7652  | 0.74 | 1.42x10 <sup>-1</sup> | 1.70  | -4.56 | 0.74  | mmu-miR-26a     |
| 6078  | 0.74 | 1.42x10 <sup>-1</sup> | -1.70 | -4.56 | -1.82 | mmu-miR-211     |
| 15083 | 0.74 | 1.42x10 <sup>-1</sup> | -1.70 | -4.56 | -0.77 | mmu-miR-98      |
| 9246  | 0.74 | 1.42x10 <sup>-1</sup> | 1.70  | -4.56 | 0.59  | mmu-miR-20b     |
| 14173 | 0.74 | 1.43x10 <sup>-1</sup> | 1.70  | -4.56 | 1.26  | mmu-miR-1897-5p |
| 11902 | 0.74 | 1.43x10 <sup>-1</sup> | 1.69  | -4.56 | 1.12  | mmu-miR-709     |
| 9587  | 0.74 | 1.43x10 <sup>-1</sup> | 1.69  | -4.56 | 1.23  | mmu-miR-122     |
| 6710  | 0.74 | 1.44x10 <sup>-1</sup> | 1.69  | -4.56 | 0.53  | mmu-miR-183     |
| 9262  | 0.74 | 1.44x10 <sup>-1</sup> | 1.69  | -4.56 | 1.95  | mmu-miR-34c     |
| 5849  | 0.74 | 1.44x10 <sup>-1</sup> | 1.69  | -4.56 | 1.41  | mmu-miR-224     |

|       |      |                       |       |       |       |                 |
|-------|------|-----------------------|-------|-------|-------|-----------------|
| 2224  | 0.74 | $1.45 \times 10^{-1}$ | 1.69  | -4.56 | 3.02  | mmu-miR-320     |
| 2333  | 0.74 | $1.45 \times 10^{-1}$ | 1.68  | -4.56 | 1.92  | mmu-miR-574-5p  |
| 3880  | 0.74 | $1.46 \times 10^{-1}$ | 1.68  | -4.56 | 2.10  |                 |
| 4267  | 0.74 | $1.46 \times 10^{-1}$ | 1.68  | -4.56 | 1.45  | mmu-miR-449a    |
| 5619  | 0.74 | $1.46 \times 10^{-1}$ | 1.68  | -4.56 | 1.65  | mmu-miR-34c     |
| 5828  | 0.74 | $1.46 \times 10^{-1}$ | 1.68  | -4.56 | 1.53  | mmu-miR-1187    |
| 5097  | 0.74 | $1.47 \times 10^{-1}$ | 1.67  | -4.56 | 0.81  |                 |
| 6348  | 0.74 | $1.47 \times 10^{-1}$ | 1.67  | -4.56 | 0.64  | mmu-miR-100     |
| 14466 | 0.74 | $1.47 \times 10^{-1}$ | 1.67  | -4.56 | 1.93  | mmu-miR-544     |
| 5577  | 0.74 | $1.47 \times 10^{-1}$ | 1.67  | -4.56 | 1.23  | mmu-miR-1892    |
| 954   | 0.74 | $1.48 \times 10^{-1}$ | -1.67 | -4.56 | -3.51 |                 |
| 14163 | 0.74 | $1.48 \times 10^{-1}$ | 1.67  | -4.56 | 2.13  | mmu-miR-135a*   |
| 11148 | 0.74 | $1.48 \times 10^{-1}$ | -1.67 | -4.56 | -0.99 | mg hv-miR-M1-2  |
| 9672  | 0.74 | $1.49 \times 10^{-1}$ | 1.66  | -4.56 | 0.51  | mmu-miR-34c     |
| 9707  | 0.74 | $1.49 \times 10^{-1}$ | 1.66  | -4.56 | 1.90  | mmu-miR-34b-5p  |
| 6213  | 0.74 | $1.50 \times 10^{-1}$ | 1.66  | -4.56 | 0.73  | mmu-miR-125a-5p |
| 4188  | 0.74 | $1.50 \times 10^{-1}$ | 1.66  | -4.56 | 0.62  | mmu-miR-29c     |
| 4564  | 0.74 | $1.50 \times 10^{-1}$ | 1.66  | -4.56 | 0.63  | mmu-miR-31      |
| 8123  | 0.74 | $1.50 \times 10^{-1}$ | 1.66  | -4.56 | 0.45  | mmu-miR-183     |
| 1801  | 0.74 | $1.51 \times 10^{-1}$ | 1.66  | -4.56 | 0.63  |                 |
| 6762  | 0.74 | $1.51 \times 10^{-1}$ | 1.66  | -4.56 | 0.54  | mmu-miR-345-5p  |
| 1824  | 0.74 | $1.51 \times 10^{-1}$ | 1.65  | -4.56 | 1.04  | mmu-miR-136     |
| 2303  | 0.74 | $1.51 \times 10^{-1}$ | 1.65  | -4.56 | 1.08  | mmu-miR-672     |
| 6252  | 0.74 | $1.51 \times 10^{-1}$ | 1.65  | -4.56 | 0.56  | mmu-miR-99b     |
| 14178 | 0.74 | $1.51 \times 10^{-1}$ | 1.65  | -4.56 | 0.55  | mmu-miR-25      |
| 14113 | 0.74 | $1.52 \times 10^{-1}$ | 1.65  | -4.56 | 0.60  | mg hv-miR-M1-2  |
| 6111  | 0.74 | $1.52 \times 10^{-1}$ | 1.65  | -4.56 | 1.65  | mmu-miR-362-5p  |
| 8600  | 0.74 | $1.52 \times 10^{-1}$ | 1.65  | -4.56 | 0.81  | mmu-miR-206     |
| 8259  | 0.74 | $1.52 \times 10^{-1}$ | -1.65 | -4.56 | -0.61 | mmu-miR-365     |
| 7193  | 0.74 | $1.52 \times 10^{-1}$ | 1.65  | -4.56 | 0.44  | mmu-miR-125a-5p |
| 14024 | 0.74 | $1.53 \times 10^{-1}$ | 1.65  | -4.56 | 0.40  | mmu-miR-28      |
| 4499  | 0.74 | $1.53 \times 10^{-1}$ | 1.64  | -4.56 | 0.63  | mmu-miR-182     |
| 593   | 0.74 | $1.54 \times 10^{-1}$ | 1.64  | -4.56 | 0.43  | mmu-miR-151-5p  |
| 11852 | 0.74 | $1.54 \times 10^{-1}$ | 1.64  | -4.56 | 0.61  |                 |
| 7056  | 0.74 | $1.54 \times 10^{-1}$ | 1.64  | -4.56 | 1.01  | mmu-miR-709     |
| 13751 | 0.74 | $1.54 \times 10^{-1}$ | 1.64  | -4.56 | 1.13  | mmu-miR-29c     |
| 2984  | 0.74 | $1.54 \times 10^{-1}$ | 1.64  | -4.56 | 0.65  | mmu-miR-21      |
| 15328 | 0.74 | $1.54 \times 10^{-1}$ | -1.64 | -4.56 | -1.96 | mmu-miR-186     |
| 8052  | 0.74 | $1.54 \times 10^{-1}$ | 1.64  | -4.56 | 0.66  | mmu-miR-331-3p  |
| 6937  | 0.74 | $1.54 \times 10^{-1}$ | 1.64  | -4.56 | 0.58  | mmu-miR-31      |
| 11014 | 0.74 | $1.55 \times 10^{-1}$ | 1.64  | -4.56 | 0.96  | mmu-miR-34b-5p  |
| 14060 | 0.74 | $1.55 \times 10^{-1}$ | 1.64  | -4.56 | 0.54  | mmu-miR-99b     |
| 4296  | 0.74 | $1.55 \times 10^{-1}$ | 1.64  | -4.56 | 0.51  | mmu-miR-324-5p  |
| 14368 | 0.74 | $1.55 \times 10^{-1}$ | 1.63  | -4.56 | 0.56  | mmu-miR-99b     |
| 12678 | 0.74 | $1.55 \times 10^{-1}$ | -1.63 | -4.56 | -0.70 | mmu-miR-590-3p  |
| 647   | 0.74 | $1.55 \times 10^{-1}$ | -1.63 | -4.56 | -1.54 | mmu-miR-345-5p  |

|       |      |                       |       |       |       |                |
|-------|------|-----------------------|-------|-------|-------|----------------|
| 5851  | 0.74 | 1.56x10 <sup>-1</sup> | 1.63  | -4.56 | 0.54  | mmu-miR-350    |
| 5435  | 0.74 | 1.56x10 <sup>-1</sup> | 1.63  | -4.56 | 1.40  | mmu-miR-669a   |
| 15621 | 0.74 | 1.56x10 <sup>-1</sup> | -1.63 | -4.56 | -1.71 | mmu-miR-362-3p |
| 9217  | 0.74 | 1.56x10 <sup>-1</sup> | 1.63  | -4.56 | 0.67  | mmu-miR-92a    |
| 6412  | 0.74 | 1.56x10 <sup>-1</sup> | 1.63  | -4.56 | 1.46  | mmu-miR-224    |
| 6593  | 0.74 | 1.56x10 <sup>-1</sup> | 1.63  | -4.56 | 0.42  | mmu-miR-362-5p |
| 15587 | 0.74 | 1.57x10 <sup>-1</sup> | 1.62  | -4.56 | 3.46  | mmu-miR-494    |
| 9439  | 0.74 | 1.58x10 <sup>-1</sup> | -1.62 | -4.56 | -0.40 | mg hv-miR-M1-2 |
| 8016  | 0.74 | 1.58x10 <sup>-1</sup> | -1.62 | -4.56 | -1.13 | mmu-miR-376b   |
| 12883 | 0.74 | 1.58x10 <sup>-1</sup> | 1.62  | -4.56 | 0.88  | mmu-miR-34b-5p |
| 2639  | 0.74 | 1.58x10 <sup>-1</sup> | 1.62  | -4.56 | 1.67  | mmu-miR-17*    |
| 9166  | 0.74 | 1.58x10 <sup>-1</sup> | 1.62  | -4.56 | 0.63  | mmu-miR-497    |
| 6621  | 0.74 | 1.58x10 <sup>-1</sup> | 1.62  | -4.56 | 1.88  |                |
| 6529  | 0.74 | 1.59x10 <sup>-1</sup> | 1.62  | -4.56 | 0.95  | mmu-miR-196b   |
| 15659 | 0.74 | 1.59x10 <sup>-1</sup> | -1.62 | -4.56 | -1.39 | mmu-miR-877*   |
| 5877  | 0.74 | 1.59x10 <sup>-1</sup> | -1.62 | -4.56 | -1.16 | mmu-miR-7a     |
| 11471 | 0.74 | 1.59x10 <sup>-1</sup> | 1.62  | -4.56 | 0.89  | mmu-miR-20a    |
| 2030  | 0.74 | 1.59x10 <sup>-1</sup> | 1.61  | -4.56 | 0.61  |                |
| 1932  | 0.74 | 1.60x10 <sup>-1</sup> | 1.61  | -4.56 | 0.57  | mmu-miR-30d    |
| 1215  | 0.74 | 1.61x10 <sup>-1</sup> | 1.61  | -4.56 | 1.49  | mmu-miR-15b*   |
| 2987  | 0.74 | 1.61x10 <sup>-1</sup> | 1.61  | -4.56 | 0.55  |                |
| 12462 | 0.74 | 1.62x10 <sup>-1</sup> | -1.60 | -4.56 | -0.61 | mmu-let-7f*    |
| 15417 | 0.74 | 1.62x10 <sup>-1</sup> | -1.60 | -4.56 | -0.49 |                |
| 7264  | 0.74 | 1.62x10 <sup>-1</sup> | 1.60  | -4.56 | 0.66  | mmu-miR-28     |
| 14984 | 0.74 | 1.62x10 <sup>-1</sup> | 1.60  | -4.56 | 0.43  |                |
| 9669  | 0.74 | 1.62x10 <sup>-1</sup> | 1.60  | -4.56 | 1.68  | mmu-miR-29b*   |
| 14634 | 0.74 | 1.63x10 <sup>-1</sup> | 1.60  | -4.56 | 0.70  | mmu-miR-92a    |
| 7742  | 0.74 | 1.64x10 <sup>-1</sup> | 1.59  | -4.56 | 0.41  | mmu-miR-140    |
| 8142  | 0.74 | 1.64x10 <sup>-1</sup> | 1.59  | -4.56 | 2.13  | mmu-miR-702    |
| 4593  | 0.74 | 1.64x10 <sup>-1</sup> | 1.59  | -4.56 | 2.10  | mmu-miR-451    |
| 11555 | 0.74 | 1.64x10 <sup>-1</sup> | 1.59  | -4.56 | 0.70  | mmu-miR-21     |
| 1881  | 0.74 | 1.65x10 <sup>-1</sup> | 1.59  | -4.56 | 0.60  | mmu-miR-182    |
| 886   | 0.74 | 1.65x10 <sup>-1</sup> | 1.59  | -4.56 | 0.83  | mg hv-miR-M1-2 |
| 7995  | 0.74 | 1.65x10 <sup>-1</sup> | -1.59 | -4.56 | -0.40 | mmu-miR-30a    |
| 5983  | 0.74 | 1.65x10 <sup>-1</sup> | 1.59  | -4.56 | 0.94  | mmu-miR-1906   |
| 4782  | 0.74 | 1.66x10 <sup>-1</sup> | 1.59  | -4.56 | 0.68  | mmu-miR-92a    |
| 7429  | 0.74 | 1.66x10 <sup>-1</sup> | 1.58  | -4.56 | 0.58  |                |
| 11198 | 0.74 | 1.66x10 <sup>-1</sup> | 1.58  | -4.56 | 1.09  | mmu-miR-702    |
| 3424  | 0.74 | 1.66x10 <sup>-1</sup> | 1.58  | -4.56 | 0.90  | mmu-miR-140*   |
| 3720  | 0.74 | 1.66x10 <sup>-1</sup> | 1.58  | -4.56 | 0.62  |                |
| 4996  | 0.74 | 1.67x10 <sup>-1</sup> | -1.58 | -4.56 | -2.82 |                |
| 13683 | 0.74 | 1.67x10 <sup>-1</sup> | 1.58  | -4.56 | 0.50  | mmu-miR-28     |
| 994   | 0.74 | 1.67x10 <sup>-1</sup> | 1.58  | -4.56 | 0.76  | mmu-miR-26a    |
| 7024  | 0.74 | 1.67x10 <sup>-1</sup> | 1.58  | -4.56 | 0.71  | mmu-miR-92a    |
| 13559 | 0.74 | 1.67x10 <sup>-1</sup> | 1.58  | -4.56 | 0.41  | mmu-miR-22     |
| 10788 | 0.74 | 1.67x10 <sup>-1</sup> | 1.58  | -4.56 | 0.72  | mmu-miR-29a    |

|       |      |                       |       |       |       |                 |
|-------|------|-----------------------|-------|-------|-------|-----------------|
| 6546  | 0.74 | $1.68 \times 10^{-1}$ | 1.58  | -4.56 | 1.61  | mmu-miR-574-5p  |
| 2576  | 0.74 | $1.68 \times 10^{-1}$ | 1.58  | -4.56 | 0.78  | mmu-miR-450b-5p |
| 11221 | 0.74 | $1.68 \times 10^{-1}$ | 1.57  | -4.56 | 1.03  | mmu-miR-709     |
| 12344 | 0.74 | $1.68 \times 10^{-1}$ | 1.57  | -4.56 | 0.61  | mmu-miR-182     |
| 5627  | 0.74 | $1.68 \times 10^{-1}$ | 1.57  | -4.56 | 0.39  | mmu-miR-149     |
| 12779 | 0.74 | $1.69 \times 10^{-1}$ | 1.57  | -4.56 | 0.97  | mmu-miR-29c     |
| 1055  | 0.74 | $1.69 \times 10^{-1}$ | 1.57  | -4.56 | 0.61  | mmu-miR-193b    |
| 7169  | 0.74 | $1.69 \times 10^{-1}$ | 1.57  | -4.56 | 1.05  | mmu-miR-223     |
| 3380  | 0.74 | $1.69 \times 10^{-1}$ | 1.57  | -4.56 | 0.45  | mmu-let-7e      |
| 8293  | 0.74 | $1.69 \times 10^{-1}$ | 1.57  | -4.56 | 0.66  | mmu-miR-125a-5p |
| 10281 | 0.74 | $1.70 \times 10^{-1}$ | 1.57  | -4.56 | 0.62  | mmu-miR-185     |
| 6629  | 0.74 | $1.70 \times 10^{-1}$ | 1.57  | -4.56 | 0.36  |                 |
| 9225  | 0.74 | $1.71 \times 10^{-1}$ | 1.56  | -4.56 | 0.80  | mmu-miR-324-3p  |
| 9551  | 0.74 | $1.72 \times 10^{-1}$ | 1.56  | -4.56 | 2.83  | mmu-miR-1894-3p |
| 11647 | 0.74 | $1.72 \times 10^{-1}$ | 1.56  | -4.56 | 0.76  | mmu-miR-34b-5p  |
| 12957 | 0.74 | $1.72 \times 10^{-1}$ | 1.56  | -4.56 | 0.65  | mmu-miR-20a     |
| 6075  | 0.74 | $1.72 \times 10^{-1}$ | 1.56  | -4.56 | 0.47  | mmu-miR-331-3p  |
| 10741 | 0.74 | $1.72 \times 10^{-1}$ | -1.56 | -4.56 | -1.11 | mmu-miR-872     |
| 3593  | 0.74 | $1.72 \times 10^{-1}$ | 1.56  | -4.56 | 1.01  | mmu-miR-34b-5p  |
| 6833  | 0.74 | $1.73 \times 10^{-1}$ | 1.56  | -4.56 | 0.73  | mmu-miR-331-3p  |
| 8557  | 0.74 | $1.73 \times 10^{-1}$ | 1.55  | -4.56 | 0.49  | mmu-miR-193b    |
| 9427  | 0.74 | $1.73 \times 10^{-1}$ | 1.55  | -4.56 | 0.86  | mmu-miR-34b-5p  |
| 10538 | 0.74 | $1.73 \times 10^{-1}$ | 1.55  | -4.56 | 0.68  | mmu-miR-10b     |
| 13822 | 0.74 | $1.73 \times 10^{-1}$ | 1.55  | -4.56 | 0.49  | mmu-miR-30d     |
| 14986 | 0.74 | $1.73 \times 10^{-1}$ | -1.55 | -4.56 | -0.38 | mmu-miR-30a     |
| 258   | 0.74 | $1.74 \times 10^{-1}$ | 1.55  | -4.56 | 1.15  | mmu-miR-876-5p  |
| 129   | 0.74 | $1.74 \times 10^{-1}$ | -1.55 | -4.56 | -0.97 | mmu-miR-29b     |
| 14103 | 0.74 | $1.74 \times 10^{-1}$ | 1.55  | -4.56 | 2.99  | mmu-miR-689     |
| 12263 | 0.74 | $1.75 \times 10^{-1}$ | 1.55  | -4.56 | 0.70  | mmu-miR-203*    |
| 14133 | 0.74 | $1.75 \times 10^{-1}$ | -1.55 | -4.56 | -1.29 | mmu-miR-122     |
| 11830 | 0.74 | $1.75 \times 10^{-1}$ | -1.55 | -4.56 | -1.14 |                 |
| 6314  | 0.74 | $1.75 \times 10^{-1}$ | 1.55  | -4.56 | 0.56  | mmu-miR-99b     |
| 1887  | 0.74 | $1.75 \times 10^{-1}$ | 1.54  | -4.56 | 0.66  | mmu-miR-149     |
| 5778  | 0.74 | $1.75 \times 10^{-1}$ | 1.54  | -4.56 | 0.45  | mmu-miR-22      |
| 9843  | 0.74 | $1.75 \times 10^{-1}$ | -1.54 | -4.56 | -0.91 | mmu-miR-324-5p  |
| 12463 | 0.74 | $1.76 \times 10^{-1}$ | -1.54 | -4.57 | -2.10 | mmu-miR-199a-3p |
| 4975  | 0.74 | $1.76 \times 10^{-1}$ | 1.54  | -4.57 | 1.00  | mmu-miR-34b-5p  |
| 8987  | 0.74 | $1.77 \times 10^{-1}$ | 1.54  | -4.57 | 2.14  | mmu-miR-188-5p  |
| 3448  | 0.74 | $1.77 \times 10^{-1}$ | 1.54  | -4.57 | 1.51  | mmu-miR-365     |
| 5395  | 0.74 | $1.77 \times 10^{-1}$ | 1.54  | -4.57 | 0.54  | mmu-miR-182     |
| 4028  | 0.74 | $1.77 \times 10^{-1}$ | 1.54  | -4.57 | 0.59  | mmu-let-7b*     |
| 13603 | 0.74 | $1.77 \times 10^{-1}$ | -1.54 | -4.57 | -1.41 | mmu-miR-362-3p  |
| 4643  | 0.74 | $1.77 \times 10^{-1}$ | 1.54  | -4.57 | 0.66  | mmu-miR-29c     |
| 15211 | 0.74 | $1.77 \times 10^{-1}$ | -1.53 | -4.57 | -0.63 | mmu-miR-30a*    |
| 6023  | 0.74 | $1.78 \times 10^{-1}$ | -1.53 | -4.57 | -1.01 | mmu-miR-199a-3p |
| 11588 | 0.74 | $1.78 \times 10^{-1}$ | 1.53  | -4.57 | 1.46  | mmu-miR-376c*   |

|       |      |                       |       |       |       |                 |
|-------|------|-----------------------|-------|-------|-------|-----------------|
| 2631  | 0.74 | $1.78 \times 10^{-1}$ | 1.53  | -4.57 | 0.76  | mmu-miR-361     |
| 98    | 0.74 | $1.78 \times 10^{-1}$ | 1.53  | -4.57 | 1.35  | mmu-miR-188-5p  |
| 14386 | 0.74 | $1.78 \times 10^{-1}$ | 1.53  | -4.57 | 0.93  | mmu-miR-34b-5p  |
| 3321  | 0.74 | $1.79 \times 10^{-1}$ | -1.53 | -4.57 | -1.24 | mmu-miR-223     |
| 10464 | 0.74 | $1.79 \times 10^{-1}$ | 1.53  | -4.57 | 0.50  |                 |
| 15336 | 0.74 | $1.79 \times 10^{-1}$ | 1.53  | -4.57 | 0.71  | mmu-miR-20a     |
| 10402 | 0.74 | $1.79 \times 10^{-1}$ | 1.53  | -4.57 | 0.97  | mmu-miR-34b-5p  |
| 4294  | 0.74 | $1.79 \times 10^{-1}$ | 1.53  | -4.57 | 0.56  | mmu-let-7b*     |
| 5832  | 0.74 | $1.80 \times 10^{-1}$ | 1.53  | -4.57 | 2.03  | mmu-miR-877*    |
| 6458  | 0.74 | $1.80 \times 10^{-1}$ | 1.53  | -4.57 | 0.35  | mmu-miR-140     |
| 8577  | 0.74 | $1.80 \times 10^{-1}$ | 1.53  | -4.57 | 0.40  | mmu-miR-125a-5p |
| 6094  | 0.74 | $1.80 \times 10^{-1}$ | 1.52  | -4.57 | 1.70  | mmu-miR-499     |
| 91    | 0.74 | $1.80 \times 10^{-1}$ | -1.52 | -4.57 | -0.45 | mmu-miR-497     |
| 1305  | 0.74 | $1.80 \times 10^{-1}$ | 1.52  | -4.57 | 1.56  | mmu-miR-17*     |
| 3408  | 0.74 | $1.80 \times 10^{-1}$ | 1.52  | -4.57 | 0.54  | mmu-miR-183     |
| 5452  | 0.74 | $1.81 \times 10^{-1}$ | 1.52  | -4.57 | 0.76  | mmu-miR-20a     |
| 3240  | 0.74 | $1.82 \times 10^{-1}$ | 1.52  | -4.57 | 0.79  | mmu-miR-20a     |
| 3017  | 0.74 | $1.82 \times 10^{-1}$ | 1.51  | -4.57 | 0.64  | mmu-miR-709     |
| 13457 | 0.74 | $1.82 \times 10^{-1}$ | 1.51  | -4.57 | 1.64  | mmu-miR-221     |
| 6196  | 0.74 | $1.83 \times 10^{-1}$ | -1.51 | -4.57 | -0.44 | mmu-miR-30a     |
| 5697  | 0.74 | $1.83 \times 10^{-1}$ | 1.51  | -4.57 | 0.91  | mmu-miR-34b-5p  |
| 6698  | 0.74 | $1.83 \times 10^{-1}$ | 1.51  | -4.57 | 0.59  | mmu-miR-872     |
| 10179 | 0.74 | $1.83 \times 10^{-1}$ | 1.51  | -4.57 | 0.50  |                 |
| 10641 | 0.74 | $1.84 \times 10^{-1}$ | 1.51  | -4.57 | 0.79  | mmu-miR-20a     |
| 903   | 0.74 | $1.84 \times 10^{-1}$ | 1.51  | -4.57 | 0.61  | mmu-miR-380-3p  |
| 9085  | 0.74 | $1.84 \times 10^{-1}$ | -1.51 | -4.57 | -0.47 | mmu-miR-7b      |
| 13813 | 0.74 | $1.84 \times 10^{-1}$ | 1.51  | -4.57 | 0.41  | mmu-miR-106b    |
| 7407  | 0.74 | $1.84 \times 10^{-1}$ | 1.51  | -4.57 | 0.52  |                 |
| 14771 | 0.74 | $1.84 \times 10^{-1}$ | 1.51  | -4.57 | 0.36  | mmu-miR-23a     |
| 9430  | 0.74 | $1.85 \times 10^{-1}$ | 1.51  | -4.57 | 0.52  | mmu-miR-674*    |
| 7984  | 0.74 | $1.85 \times 10^{-1}$ | 1.51  | -4.57 | 0.95  | mmu-miR-469     |
| 15508 | 0.74 | $1.85 \times 10^{-1}$ | 1.50  | -4.57 | 0.65  | mmu-miR-709     |
| 1528  | 0.74 | $1.85 \times 10^{-1}$ | 1.50  | -4.57 | 0.41  | mmu-miR-183     |
| 5612  | 0.74 | $1.86 \times 10^{-1}$ | -1.50 | -4.57 | -0.40 | mmu-miR-221     |
| 3089  | 0.74 | $1.86 \times 10^{-1}$ | 1.50  | -4.57 | 0.43  | mmu-miR-30d     |
| 398   | 0.74 | $1.86 \times 10^{-1}$ | 1.50  | -4.57 | 0.87  | mmu-miR-290-3p  |
| 489   | 0.74 | $1.86 \times 10^{-1}$ | -1.50 | -4.57 | -2.78 | mmu-miR-154     |
| 12055 | 0.74 | $1.86 \times 10^{-1}$ | 1.50  | -4.57 | 0.91  | mmu-miR-125a-5p |
| 14013 | 0.74 | $1.87 \times 10^{-1}$ | 1.50  | -4.57 | 0.84  | mmu-miR-497     |
| 13241 | 0.74 | $1.87 \times 10^{-1}$ | 1.50  | -4.57 | 1.70  | mmu-miR-1895    |
| 3302  | 0.74 | $1.88 \times 10^{-1}$ | 1.49  | -4.57 | 0.51  |                 |
| 13597 | 0.74 | $1.88 \times 10^{-1}$ | -1.49 | -4.57 | -0.48 | mmu-miR-27b     |
| 2836  | 0.74 | $1.88 \times 10^{-1}$ | 1.49  | -4.57 | 2.60  | mmu-miR-1906    |
| 6336  | 0.74 | $1.88 \times 10^{-1}$ | 1.49  | -4.57 | 0.95  | mmu-miR-34b-5p  |
| 3688  | 0.74 | $1.88 \times 10^{-1}$ | 1.49  | -4.57 | 0.40  | mmu-miR-99b     |
| 4024  | 0.74 | $1.88 \times 10^{-1}$ | 1.49  | -4.57 | 2.39  | mmu-miR-146a    |

|       |      |                       |       |       |       |                   |
|-------|------|-----------------------|-------|-------|-------|-------------------|
| 9767  | 0.74 | 1.88x10 <sup>-1</sup> | 1.49  | -4.57 | 0.46  | mmu-miR-155       |
| 11890 | 0.74 | 1.89x10 <sup>-1</sup> | 1.49  | -4.57 | 1.08  | mmu-miR-92a       |
| 9222  | 0.74 | 1.89x10 <sup>-1</sup> | -1.49 | -4.57 | -1.11 | mmu-miR-148a      |
| 15632 | 0.74 | 1.89x10 <sup>-1</sup> | -1.49 | -4.57 | -0.84 | mmu-miR-298       |
| 9965  | 0.74 | 1.90x10 <sup>-1</sup> | 1.48  | -4.57 | 1.13  |                   |
| 2231  | 0.74 | 1.90x10 <sup>-1</sup> | 1.48  | -4.57 | 0.44  | mmu-miR-30d       |
| 7791  | 0.74 | 1.91x10 <sup>-1</sup> | 1.48  | -4.57 | 1.80  | mmu-miR-574-5p    |
| 3506  | 0.74 | 1.91x10 <sup>-1</sup> | -1.48 | -4.57 | -0.50 | mmu-miR-98        |
| 1343  | 0.74 | 1.91x10 <sup>-1</sup> | 1.48  | -4.57 | 0.71  | mmu-miR-20a       |
| 4719  | 0.74 | 1.91x10 <sup>-1</sup> | 1.48  | -4.57 | 0.86  | mmu-miR-18a       |
| 4822  | 0.74 | 1.92x10 <sup>-1</sup> | -1.48 | -4.57 | -1.58 | mmu-miR-877*      |
| 11379 | 0.74 | 1.92x10 <sup>-1</sup> | 1.48  | -4.57 | 0.58  |                   |
| 15726 | 0.74 | 1.93x10 <sup>-1</sup> | -1.47 | -4.57 | -1.03 | mmu-miR-542-3p    |
| 7442  | 0.74 | 1.94x10 <sup>-1</sup> | 1.47  | -4.57 | 0.83  | mmu-miR-92a       |
| 14810 | 0.74 | 1.94x10 <sup>-1</sup> | -1.47 | -4.57 | -1.44 | mmu-miR-700       |
| 8517  | 0.74 | 1.94x10 <sup>-1</sup> | -1.47 | -4.57 | -0.61 | mmu-miR-98        |
| 2474  | 0.74 | 1.94x10 <sup>-1</sup> | 1.47  | -4.57 | 0.52  |                   |
| 7867  | 0.74 | 1.94x10 <sup>-1</sup> | 1.47  | -4.57 | 0.69  | mmu-miR-129-3p    |
| 3356  | 0.74 | 1.94x10 <sup>-1</sup> | 1.47  | -4.57 | 2.74  | mmu-miR-181a      |
| 9143  | 0.74 | 1.95x10 <sup>-1</sup> | 1.47  | -4.57 | 0.38  | mmu-miR-99b       |
| 4568  | 0.74 | 1.95x10 <sup>-1</sup> | 1.47  | -4.57 | 1.03  | mmu-miR-20b       |
| 1336  | 0.74 | 1.95x10 <sup>-1</sup> | 1.47  | -4.57 | 0.40  | mmu-miR-125a-5p   |
| 4569  | 0.74 | 1.95x10 <sup>-1</sup> | 1.46  | -4.57 | 1.03  | mmu-miR-34b-5p    |
| 8402  | 0.74 | 1.95x10 <sup>-1</sup> | 1.46  | -4.57 | 0.51  |                   |
| 7720  | 0.74 | 1.95x10 <sup>-1</sup> | 1.46  | -4.57 | 0.34  | mmu-miR-183       |
| 5092  | 0.74 | 1.95x10 <sup>-1</sup> | -1.46 | -4.57 | -1.40 | mmu-miR-471       |
| 3454  | 0.74 | 1.96x10 <sup>-1</sup> | 1.46  | -4.57 | 0.65  | mmu-miR-709       |
| 8563  | 0.74 | 1.96x10 <sup>-1</sup> | -1.46 | -4.57 | -2.18 |                   |
| 1523  | 0.74 | 1.96x10 <sup>-1</sup> | 1.46  | -4.57 | 1.30  | mmu-miR-1897-5p   |
| 12329 | 0.74 | 1.97x10 <sup>-1</sup> | 1.46  | -4.57 | 1.41  | mmu-miR-1895      |
| 7023  | 0.74 | 1.97x10 <sup>-1</sup> | 1.46  | -4.57 | 0.36  | mmu-miR-22        |
| 13531 | 0.74 | 1.97x10 <sup>-1</sup> | 1.46  | -4.57 | 0.65  | mmu-miR-709       |
| 13967 | 0.74 | 1.97x10 <sup>-1</sup> | 1.46  | -4.57 | 0.93  | mmu-miR-30d       |
| 909   | 0.74 | 1.97x10 <sup>-1</sup> | 1.46  | -4.57 | 1.81  | mmu-miR-93        |
| 5749  | 0.74 | 1.97x10 <sup>-1</sup> | 1.46  | -4.57 | 1.85  | mcmv-miR-M23-1-5p |
| 4724  | 0.74 | 1.98x10 <sup>-1</sup> | 1.45  | -4.57 | 1.62  | mmu-miR-574-5p    |
| 2699  | 0.74 | 1.98x10 <sup>-1</sup> | 1.45  | -4.57 | 0.46  | mmu-miR-99b       |
| 10820 | 0.74 | 1.98x10 <sup>-1</sup> | 1.45  | -4.57 | 0.65  | mmu-miR-31        |
| 12082 | 0.74 | 1.99x10 <sup>-1</sup> | 1.45  | -4.57 | 0.62  | mmu-miR-206       |
| 13498 | 0.74 | 2.00x10 <sup>-1</sup> | 1.45  | -4.57 | 0.46  | mmu-miR-361       |
| 12711 | 0.74 | 2.00x10 <sup>-1</sup> | 1.44  | -4.57 | 0.48  | mmu-miR-206       |
| 10600 | 0.74 | 2.01x10 <sup>-1</sup> | 1.44  | -4.57 | 0.85  | mmu-miR-30b       |
| 7394  | 0.74 | 2.01x10 <sup>-1</sup> | 1.44  | -4.57 | 0.39  | mmu-miR-16        |
| 10470 | 0.74 | 2.01x10 <sup>-1</sup> | 1.44  | -4.57 | 1.07  | mmu-miR-92a       |
| 7216  | 0.74 | 2.01x10 <sup>-1</sup> | 1.44  | -4.57 | 0.43  | mmu-miR-125a-5p   |
| 7455  | 0.74 | 2.02x10 <sup>-1</sup> | 1.44  | -4.57 | 1.08  |                   |

|       |      |                       |       |       |       |                 |
|-------|------|-----------------------|-------|-------|-------|-----------------|
| 7825  | 0.74 | $2.02 \times 10^{-1}$ | 1.44  | -4.57 | 0.76  | mmu-let-7f*     |
| 81    | 0.74 | $2.02 \times 10^{-1}$ | 1.44  | -4.57 | 0.35  |                 |
| 2286  | 0.74 | $2.02 \times 10^{-1}$ | 1.44  | -4.57 | 0.58  | mmu-miR-361     |
| 12991 | 0.74 | $2.02 \times 10^{-1}$ | 1.44  | -4.57 | 1.15  | mmu-miR-34c     |
| 6214  | 0.74 | $2.02 \times 10^{-1}$ | 1.44  | -4.57 | 0.87  | mmu-miR-30d     |
| 10280 | 0.74 | $2.02 \times 10^{-1}$ | 1.44  | -4.57 | 0.66  | mmu-miR-125a-5p |
| 13134 | 0.74 | $2.03 \times 10^{-1}$ | 1.44  | -4.57 | 0.69  | mmu-miR-20a     |
| 2227  | 0.74 | $2.03 \times 10^{-1}$ | 1.43  | -4.57 | 0.64  | mmu-miR-193b    |
| 13744 | 0.74 | $2.03 \times 10^{-1}$ | 1.43  | -4.57 | 0.50  |                 |
| 8423  | 0.74 | $2.03 \times 10^{-1}$ | 1.43  | -4.57 | 0.90  | mmu-miR-709     |
| 3142  | 0.74 | $2.03 \times 10^{-1}$ | 1.43  | -4.57 | 0.73  | mmu-miR-99b     |
| 7140  | 0.74 | $2.03 \times 10^{-1}$ | 1.43  | -4.57 | 1.71  | mmu-miR-148a    |
| 14414 | 0.74 | $2.03 \times 10^{-1}$ | 1.43  | -4.57 | 0.88  | mmu-miR-136*    |
| 6928  | 0.74 | $2.04 \times 10^{-1}$ | 1.43  | -4.57 | 0.40  | mmu-miR-23a     |
| 3450  | 0.74 | $2.04 \times 10^{-1}$ | 1.43  | -4.57 | 0.40  | mmu-miR-26b     |
| 11810 | 0.74 | $2.04 \times 10^{-1}$ | -1.43 | -4.57 | -0.70 | mmu-miR-378     |
| 4168  | 0.74 | $2.04 \times 10^{-1}$ | -1.43 | -4.57 | -2.09 | mmu-miR-136     |
| 10125 | 0.74 | $2.05 \times 10^{-1}$ | 1.43  | -4.57 | 0.35  | mmu-let-7c      |
| 2532  | 0.74 | $2.05 \times 10^{-1}$ | 1.43  | -4.57 | 1.02  | mmu-miR-7b      |
| 6286  | 0.74 | $2.06 \times 10^{-1}$ | 1.43  | -4.57 | 0.37  | mmu-miR-22      |
| 2496  | 0.74 | $2.06 \times 10^{-1}$ | 1.42  | -4.57 | 0.51  | mmu-miR-193b    |
| 4322  | 0.74 | $2.06 \times 10^{-1}$ | 1.42  | -4.57 | 0.77  | mmu-miR-324-3p  |
| 14558 | 0.74 | $2.07 \times 10^{-1}$ | 1.42  | -4.57 | 1.55  | mmu-miR-1187    |
| 6619  | 0.74 | $2.07 \times 10^{-1}$ | 1.42  | -4.57 | 0.67  | mmu-miR-29a     |
| 11336 | 0.74 | $2.07 \times 10^{-1}$ | 1.42  | -4.57 | 0.37  | mmu-miR-183     |
| 14675 | 0.74 | $2.08 \times 10^{-1}$ | 1.42  | -4.57 | 0.56  |                 |
| 418   | 0.74 | $2.08 \times 10^{-1}$ | 1.42  | -4.57 | 1.52  | mmu-miR-135b    |
| 7131  | 0.74 | $2.08 \times 10^{-1}$ | -1.42 | -4.57 | -3.04 | mmu-miR-295     |
| 7035  | 0.74 | $2.08 \times 10^{-1}$ | 1.42  | -4.57 | 0.84  | mmu-miR-872     |
| 2125  | 0.74 | $2.08 \times 10^{-1}$ | 1.42  | -4.57 | 0.69  | mmu-miR-29a     |
| 15664 | 0.74 | $2.08 \times 10^{-1}$ | -1.42 | -4.57 | -0.44 |                 |
| 15492 | 0.74 | $2.08 \times 10^{-1}$ | 1.42  | -4.57 | 0.61  | mmu-miR-92a     |
| 12955 | 0.74 | $2.09 \times 10^{-1}$ | 1.41  | -4.57 | 1.65  | mmu-miR-186*    |
| 15413 | 0.74 | $2.09 \times 10^{-1}$ | -1.41 | -4.57 | -2.98 | mmu-miR-337-5p  |
| 3016  | 0.74 | $2.09 \times 10^{-1}$ | 1.41  | -4.57 | 0.38  | mmu-miR-22      |
| 6637  | 0.74 | $2.09 \times 10^{-1}$ | 1.41  | -4.57 | 0.37  | mmu-miR-22      |
| 8274  | 0.74 | $2.10 \times 10^{-1}$ | 1.41  | -4.57 | 0.45  | mmu-miR-27a     |
| 13369 | 0.74 | $2.10 \times 10^{-1}$ | 1.41  | -4.57 | 0.62  | mmu-miR-1906    |
| 9482  | 0.74 | $2.11 \times 10^{-1}$ | 1.41  | -4.57 | 0.57  | mmu-miR-296-5p  |
| 11731 | 0.74 | $2.12 \times 10^{-1}$ | 1.40  | -4.57 | 1.21  | mmu-miR-155     |
| 11922 | 0.74 | $2.12 \times 10^{-1}$ | 1.40  | -4.57 | 0.69  | mmu-miR-29b     |
| 11835 | 0.74 | $2.12 \times 10^{-1}$ | 1.40  | -4.57 | 0.72  | mmu-miR-18a     |
| 12752 | 0.74 | $2.13 \times 10^{-1}$ | -1.40 | -4.57 | -3.75 | mmu-miR-18a*    |
| 5932  | 0.74 | $2.13 \times 10^{-1}$ | 1.40  | -4.57 | 2.72  | mmu-miR-152     |
| 3845  | 0.74 | $2.13 \times 10^{-1}$ | -1.40 | -4.57 | -1.72 | mmu-miR-802     |
| 7313  | 0.74 | $2.13 \times 10^{-1}$ | 1.40  | -4.57 | 0.66  |                 |



|       |      |                       |       |       |       |                   |
|-------|------|-----------------------|-------|-------|-------|-------------------|
| 347   | 0.74 | $2.14 \times 10^{-1}$ | 1.40  | -4.57 | 0.39  | mmu-miR-155       |
| 7489  | 0.74 | $2.14 \times 10^{-1}$ | 1.40  | -4.57 | 0.38  | mmu-miR-151-5p    |
| 10602 | 0.74 | $2.14 \times 10^{-1}$ | 1.39  | -4.57 | 0.42  | mmu-miR-106b      |
| 3462  | 0.74 | $2.14 \times 10^{-1}$ | 1.39  | -4.57 | 0.36  | mmu-miR-16        |
| 599   | 0.74 | $2.14 \times 10^{-1}$ | 1.39  | -4.57 | 0.33  | mmu-miR-151-5p    |
| 12583 | 0.74 | $2.15 \times 10^{-1}$ | -1.39 | -4.57 | -1.54 | mmu-miR-423-5p    |
| 11949 | 0.74 | $2.15 \times 10^{-1}$ | -1.39 | -4.57 | -0.44 | mmu-miR-345-5p    |
| 1252  | 0.74 | $2.16 \times 10^{-1}$ | -1.39 | -4.57 | -0.60 | mmu-miR-590-5p    |
| 349   | 0.74 | $2.16 \times 10^{-1}$ | 1.39  | -4.57 | 0.34  | mmu-miR-322       |
| 264   | 0.74 | $2.16 \times 10^{-1}$ | 1.39  | -4.57 | 0.42  | mmu-miR-350       |
| 5710  | 0.74 | $2.16 \times 10^{-1}$ | 1.39  | -4.57 | 1.24  | mmu-miR-146a      |
| 12902 | 0.74 | $2.18 \times 10^{-1}$ | 1.38  | -4.57 | 0.52  | mmu-miR-224       |
| 9748  | 0.74 | $2.18 \times 10^{-1}$ | -1.38 | -4.57 | -0.69 | mmu-miR-196b      |
| 2261  | 0.74 | $2.18 \times 10^{-1}$ | 1.38  | -4.57 | 0.79  | mg hv-miR-M1-2    |
| 13009 | 0.74 | $2.18 \times 10^{-1}$ | -1.38 | -4.57 | -0.93 | mmu-miR-191*      |
| 7371  | 0.74 | $2.18 \times 10^{-1}$ | -1.38 | -4.57 | -0.90 |                   |
| 6293  | 0.74 | $2.18 \times 10^{-1}$ | 1.38  | -4.57 | 0.45  | mmu-let-7e        |
| 9466  | 0.74 | $2.19 \times 10^{-1}$ | 1.38  | -4.57 | 0.64  | mmu-miR-709       |
| 7562  | 0.74 | $2.19 \times 10^{-1}$ | 1.38  | -4.57 | 0.88  | mmu-miR-709       |
| 13269 | 0.74 | $2.19 \times 10^{-1}$ | 1.38  | -4.57 | 0.75  | mmu-miR-20a       |
| 11215 | 0.74 | $2.20 \times 10^{-1}$ | 1.38  | -4.57 | 1.35  | mmu-miR-301a      |
| 11707 | 0.74 | $2.20 \times 10^{-1}$ | 1.38  | -4.57 | 0.41  |                   |
| 6206  | 0.74 | $2.20 \times 10^{-1}$ | 1.37  | -4.57 | 0.30  | mmu-miR-107       |
| 8056  | 0.74 | $2.20 \times 10^{-1}$ | 1.37  | -4.57 | 1.58  | mmu-miR-298       |
| 13876 | 0.74 | $2.21 \times 10^{-1}$ | -1.37 | -4.57 | -2.02 | mmu-miR-483*      |
| 2677  | 0.74 | $2.21 \times 10^{-1}$ | 1.37  | -4.57 | 0.61  | mmu-miR-92a       |
| 6865  | 0.74 | $2.21 \times 10^{-1}$ | 1.37  | -4.57 | 0.34  | mmu-miR-27a       |
| 6474  | 0.75 | $2.21 \times 10^{-1}$ | 1.37  | -4.58 | 0.36  | mmu-miR-22        |
| 10614 | 0.75 | $2.22 \times 10^{-1}$ | 1.37  | -4.58 | 0.76  | mmu-miR-668       |
| 3100  | 0.75 | $2.23 \times 10^{-1}$ | 1.36  | -4.58 | 0.48  |                   |
| 4964  | 0.75 | $2.23 \times 10^{-1}$ | 1.36  | -4.58 | 0.39  | mmu-miR-16        |
| 2693  | 0.75 | $2.24 \times 10^{-1}$ | -1.36 | -4.58 | -0.81 | mmu-miR-668       |
| 9898  | 0.75 | $2.24 \times 10^{-1}$ | 1.36  | -4.58 | 1.02  | mg hv-miR-M1-7-3p |
| 4720  | 0.75 | $2.24 \times 10^{-1}$ | 1.36  | -4.58 | 0.90  |                   |
| 10800 | 0.75 | $2.25 \times 10^{-1}$ | 1.36  | -4.58 | 0.90  | mmu-miR-715       |
| 15028 | 0.75 | $2.25 \times 10^{-1}$ | -1.36 | -4.58 | -0.40 | mmu-miR-10b       |
| 11527 | 0.75 | $2.26 \times 10^{-1}$ | 1.36  | -4.58 | 1.35  | mmu-miR-1895      |
| 2952  | 0.75 | $2.26 \times 10^{-1}$ | 1.36  | -4.58 | 0.38  | mmu-let-7c        |
| 4737  | 0.75 | $2.26 \times 10^{-1}$ | -1.35 | -4.58 | -0.35 | mmu-miR-23b       |
| 1800  | 0.75 | $2.26 \times 10^{-1}$ | 1.35  | -4.58 | 0.65  | mmu-miR-29b*      |
| 11636 | 0.75 | $2.27 \times 10^{-1}$ | 1.35  | -4.58 | 0.56  | mmu-miR-182       |
| 5239  | 0.75 | $2.27 \times 10^{-1}$ | 1.35  | -4.58 | 0.47  | mmu-miR-155       |
| 3929  | 0.75 | $2.27 \times 10^{-1}$ | 1.35  | -4.58 | 0.44  |                   |
| 3682  | 0.75 | $2.27 \times 10^{-1}$ | 1.35  | -4.58 | 1.45  | mmu-miR-574-5p    |
| 7110  | 0.75 | $2.27 \times 10^{-1}$ | 1.35  | -4.58 | 0.37  | mmu-miR-22        |
| 11323 | 0.75 | $2.27 \times 10^{-1}$ | 1.35  | -4.58 | 0.53  | mmu-miR-193b      |

|       |      |                       |       |       |       |                 |
|-------|------|-----------------------|-------|-------|-------|-----------------|
| 1860  | 0.75 | $2.28 \times 10^{-1}$ | 1.35  | -4.58 | 0.67  | mmu-miR-345-5p  |
| 12928 | 0.75 | $2.28 \times 10^{-1}$ | 1.35  | -4.58 | 0.36  | mmu-miR-22      |
| 13513 | 0.75 | $2.28 \times 10^{-1}$ | 1.35  | -4.58 | 1.32  | mmu-miR-190     |
| 10380 | 0.75 | $2.28 \times 10^{-1}$ | 1.35  | -4.58 | 0.94  | mmu-miR-190b    |
| 11995 | 0.75 | $2.28 \times 10^{-1}$ | 1.35  | -4.58 | 4.10  | mmu-miR-721     |
| 2989  | 0.75 | $2.28 \times 10^{-1}$ | 1.35  | -4.58 | 0.57  | mmu-miR-296-5p  |
| 8894  | 0.75 | $2.29 \times 10^{-1}$ | 1.35  | -4.58 | 1.02  |                 |
| 1170  | 0.75 | $2.29 \times 10^{-1}$ | 1.34  | -4.58 | 0.75  | mmu-miR-423-5p  |
| 1567  | 0.75 | $2.29 \times 10^{-1}$ | 1.34  | -4.58 | 0.38  | mmu-let-7e      |
| 10711 | 0.75 | $2.29 \times 10^{-1}$ | 1.34  | -4.58 | 0.37  | mmu-miR-22      |
| 8903  | 0.75 | $2.29 \times 10^{-1}$ | 1.34  | -4.58 | 3.04  | mmu-miR-338-3p  |
| 2522  | 0.75 | $2.30 \times 10^{-1}$ | 1.34  | -4.58 | 0.82  | mmu-miR-34b-5p  |
| 3497  | 0.75 | $2.30 \times 10^{-1}$ | 1.34  | -4.58 | 0.34  | mmu-miR-125a-5p |
| 8396  | 0.75 | $2.30 \times 10^{-1}$ | 1.34  | -4.58 | 0.60  | mmu-miR-709     |
| 15692 | 0.75 | $2.30 \times 10^{-1}$ | 1.34  | -4.58 | 1.05  | mmu-miR-125a-3p |
| 14071 | 0.75 | $2.31 \times 10^{-1}$ | -1.34 | -4.58 | -1.80 | mmu-miR-365     |
| 8211  | 0.75 | $2.31 \times 10^{-1}$ | 1.34  | -4.58 | 0.67  | mmu-miR-464     |
| 10465 | 0.75 | $2.31 \times 10^{-1}$ | -1.34 | -4.58 | -0.44 | mmu-miR-465a-3p |
| 78    | 0.75 | $2.31 \times 10^{-1}$ | 1.34  | -4.58 | 1.36  | mmu-miR-181a    |
| 5252  | 0.75 | $2.31 \times 10^{-1}$ | 1.34  | -4.58 | 0.63  | mmu-miR-709     |
| 3055  | 0.75 | $2.32 \times 10^{-1}$ | 1.34  | -4.58 | 0.45  | mmu-miR-155     |
| 10674 | 0.75 | $2.33 \times 10^{-1}$ | -1.33 | -4.58 | -0.60 | mmu-miR-7a      |
| 7341  | 0.75 | $2.34 \times 10^{-1}$ | 1.33  | -4.58 | 2.71  | mmu-miR-1906    |
| 13725 | 0.75 | $2.35 \times 10^{-1}$ | -1.32 | -4.58 | -1.02 | mmu-let-7f*     |
| 1017  | 0.75 | $2.35 \times 10^{-1}$ | 1.32  | -4.58 | 0.40  | mmu-miR-28      |
| 15581 | 0.75 | $2.35 \times 10^{-1}$ | -1.32 | -4.58 | -0.43 |                 |
| 9676  | 0.75 | $2.35 \times 10^{-1}$ | 1.32  | -4.58 | 1.95  | mmu-miR-152     |
| 7708  | 0.75 | $2.36 \times 10^{-1}$ | 1.32  | -4.58 | 0.31  | mmu-miR-672     |
| 6     | 0.75 | $2.36 \times 10^{-1}$ | 1.32  | -4.58 | 0.35  | mmu-miR-155     |
| 7434  | 0.75 | $2.36 \times 10^{-1}$ | -1.32 | -4.58 | -0.67 | mmu-miR-191*    |
| 1519  | 0.75 | $2.36 \times 10^{-1}$ | 1.32  | -4.58 | 0.51  | mmu-miR-31      |
| 13220 | 0.75 | $2.36 \times 10^{-1}$ | 1.32  | -4.58 | 1.16  | mmu-miR-1895    |
| 9093  | 0.75 | $2.36 \times 10^{-1}$ | -1.32 | -4.58 | -0.60 | mmu-miR-148b    |
| 3211  | 0.75 | $2.37 \times 10^{-1}$ | 1.32  | -4.58 | 0.58  | mmu-miR-449a    |
| 11350 | 0.75 | $2.37 \times 10^{-1}$ | 1.32  | -4.58 | 0.59  | mmu-miR-365     |
| 7663  | 0.75 | $2.37 \times 10^{-1}$ | -1.32 | -4.58 | -0.55 | mmu-miR-135b    |
| 8121  | 0.75 | $2.37 \times 10^{-1}$ | 1.32  | -4.58 | 0.60  | mmu-miR-709     |
| 10749 | 0.75 | $2.37 \times 10^{-1}$ | -1.32 | -4.58 | -0.94 | mmu-miR-702     |
| 397   | 0.75 | $2.37 \times 10^{-1}$ | -1.32 | -4.58 | -0.32 | mmu-miR-10b     |
| 82    | 0.75 | $2.38 \times 10^{-1}$ | 1.32  | -4.58 | 0.51  |                 |
| 3685  | 0.75 | $2.38 \times 10^{-1}$ | 1.32  | -4.58 | 0.44  |                 |
| 7120  | 0.75 | $2.39 \times 10^{-1}$ | 1.31  | -4.58 | 0.31  |                 |
| 7403  | 0.75 | $2.39 \times 10^{-1}$ | 1.31  | -4.58 | 0.48  | mmu-miR-26b     |
| 15301 | 0.75 | $2.40 \times 10^{-1}$ | -1.31 | -4.58 | -1.16 | mmu-miR-223     |
| 7081  | 0.75 | $2.40 \times 10^{-1}$ | 1.31  | -4.58 | 0.68  | mmu-miR-29b     |
| 12627 | 0.75 | $2.40 \times 10^{-1}$ | -1.31 | -4.58 | -0.60 | mmu-miR-324-5p  |

|       |      |                       |       |       |       |                  |
|-------|------|-----------------------|-------|-------|-------|------------------|
| 10273 | 0.75 | 2.40x10 <sup>-1</sup> | 1.31  | -4.58 | 0.59  | mmu-miR-709      |
| 8098  | 0.75 | 2.41x10 <sup>-1</sup> | 1.31  | -4.58 | 0.36  | mmu-miR-125a-5p  |
| 7357  | 0.75 | 2.41x10 <sup>-1</sup> | 1.31  | -4.58 | 0.37  | mmu-miR-125a-5p  |
| 3700  | 0.75 | 2.41x10 <sup>-1</sup> | 1.30  | -4.58 | 0.68  | mmu-miR-20a      |
| 750   | 0.75 | 2.41x10 <sup>-1</sup> | -1.30 | -4.58 | -3.24 | mmu-miR-30c-2*   |
| 6612  | 0.75 | 2.41x10 <sup>-1</sup> | -1.30 | -4.58 | -0.39 | mmu-miR-30a      |
| 8050  | 0.75 | 2.41x10 <sup>-1</sup> | 1.30  | -4.58 | 0.36  | mmu-miR-342-3p   |
| 9815  | 0.75 | 2.42x10 <sup>-1</sup> | 1.30  | -4.58 | 0.67  | mmu-miR-20a      |
| 9070  | 0.75 | 2.42x10 <sup>-1</sup> | -1.30 | -4.58 | -0.93 | mmu-miR-145*     |
| 6268  | 0.75 | 2.42x10 <sup>-1</sup> | 1.30  | -4.58 | 0.51  | mmu-miR-29c      |
| 13689 | 0.75 | 2.42x10 <sup>-1</sup> | 1.30  | -4.58 | 0.61  | mmu-miR-221      |
| 10514 | 0.75 | 2.44x10 <sup>-1</sup> | 1.30  | -4.58 | 0.41  | mmu-miR-29c      |
| 9878  | 0.75 | 2.44x10 <sup>-1</sup> | 1.30  | -4.58 | 0.41  | mmu-miR-155      |
| 3386  | 0.75 | 2.44x10 <sup>-1</sup> | 1.30  | -4.58 | 0.34  | mmu-miR-151-5p   |
| 6995  | 0.75 | 2.44x10 <sup>-1</sup> | -1.30 | -4.58 | -0.47 | mmu-miR-221      |
| 6138  | 0.75 | 2.45x10 <sup>-1</sup> | 1.29  | -4.58 | 0.54  | mmu-miR-149      |
| 6172  | 0.75 | 2.45x10 <sup>-1</sup> | -1.29 | -4.58 | -0.73 | mghv-miR-M1-7-3p |
| 205   | 0.75 | 2.46x10 <sup>-1</sup> | 1.29  | -4.58 | 0.42  | mmu-let-7e       |
| 9249  | 0.75 | 2.46x10 <sup>-1</sup> | 1.29  | -4.58 | 0.41  | mmu-let-7e       |
| 10672 | 0.75 | 2.46x10 <sup>-1</sup> | 1.29  | -4.58 | 0.37  | mmu-miR-210      |
| 15256 | 0.75 | 2.46x10 <sup>-1</sup> | 1.29  | -4.58 | 0.30  | mmu-miR-183      |
| 3095  | 0.75 | 2.46x10 <sup>-1</sup> | -1.29 | -4.58 | -0.30 | mmu-miR-324-5p   |
| 12385 | 0.75 | 2.47x10 <sup>-1</sup> | 1.29  | -4.58 | 0.85  | mmu-miR-130b     |
| 1410  | 0.75 | 2.47x10 <sup>-1</sup> | 1.29  | -4.58 | 0.91  | mmu-miR-25       |
| 15232 | 0.75 | 2.47x10 <sup>-1</sup> | -1.29 | -4.58 | -0.55 | mmu-miR-10b      |
| 2761  | 0.75 | 2.48x10 <sup>-1</sup> | -1.29 | -4.58 | -0.35 | mmu-miR-96       |
| 4107  | 0.75 | 2.48x10 <sup>-1</sup> | 1.28  | -4.58 | 0.36  | mmu-miR-196a     |
| 12689 | 0.75 | 2.48x10 <sup>-1</sup> | -1.28 | -4.58 | -1.08 | mmu-miR-380-3p   |
| 7194  | 0.76 | 2.49x10 <sup>-1</sup> | -1.28 | -4.58 | -0.41 | mmu-miR-365      |
| 6998  | 0.76 | 2.49x10 <sup>-1</sup> | -1.28 | -4.58 | -0.81 |                  |
| 456   | 0.76 | 2.50x10 <sup>-1</sup> | -1.28 | -4.58 | -0.39 | mmu-miR-30c      |
| 6264  | 0.76 | 2.50x10 <sup>-1</sup> | 1.28  | -4.58 | 1.21  | mmu-miR-350      |
| 5257  | 0.76 | 2.50x10 <sup>-1</sup> | 1.28  | -4.58 | 0.65  |                  |
| 15224 | 0.76 | 2.50x10 <sup>-1</sup> | 1.28  | -4.58 | 0.35  | mmu-miR-22       |
| 9491  | 0.76 | 2.51x10 <sup>-1</sup> | 1.27  | -4.58 | 1.07  | mmu-miR-721      |
| 7162  | 0.76 | 2.51x10 <sup>-1</sup> | -1.27 | -4.58 | -0.99 | mmu-miR-1-2-as   |
| 4551  | 0.76 | 2.51x10 <sup>-1</sup> | 1.27  | -4.58 | 0.36  | mmu-miR-22       |
| 13024 | 0.76 | 2.52x10 <sup>-1</sup> | 1.27  | -4.58 | 0.29  | mmu-miR-23a      |
| 4476  | 0.76 | 2.52x10 <sup>-1</sup> | -1.27 | -4.58 | -1.01 | mmu-miR-500      |
| 12422 | 0.76 | 2.52x10 <sup>-1</sup> | 1.27  | -4.58 | 0.41  |                  |
| 7877  | 0.76 | 2.52x10 <sup>-1</sup> | 1.27  | -4.58 | 1.13  | mmu-miR-125a-3p  |
| 10724 | 0.76 | 2.53x10 <sup>-1</sup> | 1.27  | -4.58 | 0.61  | mmu-miR-872      |
| 11233 | 0.76 | 2.53x10 <sup>-1</sup> | 1.27  | -4.58 | 0.30  | mmu-miR-22       |
| 1822  | 0.76 | 2.54x10 <sup>-1</sup> | 1.27  | -4.58 | 0.36  | mmu-miR-196b     |
| 192   | 0.76 | 2.54x10 <sup>-1</sup> | 1.27  | -4.58 | 0.33  | mmu-let-7c       |
| 9348  | 0.76 | 2.54x10 <sup>-1</sup> | 1.26  | -4.58 | 0.43  | mmu-miR-30e      |

|       |      |                       |       |       |       |                |
|-------|------|-----------------------|-------|-------|-------|----------------|
| 12019 | 0.76 | 2.54x10 <sup>-1</sup> | 1.26  | -4.58 | 2.34  |                |
| 5334  | 0.76 | 2.55x10 <sup>-1</sup> | 1.26  | -4.58 | 0.40  | mmu-miR-210    |
| 2482  | 0.76 | 2.55x10 <sup>-1</sup> | 1.26  | -4.58 | 0.42  | mmu-miR-296-5p |
| 9759  | 0.76 | 2.55x10 <sup>-1</sup> | 1.26  | -4.58 | 1.52  | mmu-miR-469    |
| 12086 | 0.76 | 2.56x10 <sup>-1</sup> | 1.26  | -4.58 | 0.35  | mmu-miR-210    |
| 13414 | 0.76 | 2.56x10 <sup>-1</sup> | 1.26  | -4.58 | 0.83  | mmu-miR-1906   |
| 12547 | 0.76 | 2.56x10 <sup>-1</sup> | -1.26 | -4.58 | -0.59 | mmu-miR-30a*   |
| 7344  | 0.76 | 2.56x10 <sup>-1</sup> | 1.26  | -4.58 | 0.30  | mmu-miR-27a    |
| 10134 | 0.76 | 2.56x10 <sup>-1</sup> | -1.26 | -4.58 | -1.00 | mghv-miR-M1-2  |
| 153   | 0.76 | 2.57x10 <sup>-1</sup> | 1.26  | -4.58 | 0.37  | mmu-miR-151-5p |
| 7396  | 0.76 | 2.57x10 <sup>-1</sup> | 1.26  | -4.58 | 0.54  | mmu-miR-18a    |
| 2580  | 0.76 | 2.57x10 <sup>-1</sup> | 1.26  | -4.58 | 0.33  | mmu-miR-361    |
| 6284  | 0.76 | 2.58x10 <sup>-1</sup> | 1.25  | -4.58 | 0.84  | mmu-miR-702    |
| 2476  | 0.76 | 2.58x10 <sup>-1</sup> | -1.25 | -4.58 | -0.78 | mmu-miR-509-3p |
| 7733  | 0.76 | 2.58x10 <sup>-1</sup> | 1.25  | -4.58 | 0.58  | mmu-miR-29b    |
| 4365  | 0.76 | 2.58x10 <sup>-1</sup> | 1.25  | -4.58 | 2.26  | mmu-miR-34c    |
| 8430  | 0.76 | 2.59x10 <sup>-1</sup> | 1.25  | -4.58 | 0.52  | mmu-miR-34b-5p |
| 5347  | 0.76 | 2.59x10 <sup>-1</sup> | 1.25  | -4.58 | 0.34  | mmu-miR-22     |
| 2321  | 0.76 | 2.60x10 <sup>-1</sup> | 1.25  | -4.58 | 0.28  | mmu-miR-23a    |
| 11661 | 0.76 | 2.60x10 <sup>-1</sup> | 1.25  | -4.58 | 0.33  | mmu-miR-296-5p |
| 715   | 0.76 | 2.60x10 <sup>-1</sup> | 1.25  | -4.58 | 0.34  | mmu-miR-22     |
| 5482  | 0.76 | 2.60x10 <sup>-1</sup> | 1.25  | -4.58 | 0.43  |                |
| 12244 | 0.76 | 2.60x10 <sup>-1</sup> | 1.25  | -4.58 | 0.80  | mmu-miR-709    |
| 13161 | 0.76 | 2.61x10 <sup>-1</sup> | -1.25 | -4.58 | -1.42 | mmu-miR-211    |
| 15054 | 0.76 | 2.61x10 <sup>-1</sup> | 1.24  | -4.58 | 0.51  | mmu-miR-26a    |
| 2378  | 0.76 | 2.62x10 <sup>-1</sup> | 1.24  | -4.58 | 0.37  | mmu-miR-301a   |
| 11730 | 0.76 | 2.62x10 <sup>-1</sup> | 1.24  | -4.58 | 0.32  | mmu-let-7c     |
| 6064  | 0.76 | 2.62x10 <sup>-1</sup> | 1.24  | -4.58 | 2.12  | mghv-miR-M1-6  |
| 940   | 0.76 | 2.62x10 <sup>-1</sup> | 1.24  | -4.58 | 0.42  |                |
| 11803 | 0.76 | 2.63x10 <sup>-1</sup> | -1.24 | -4.58 | -0.66 | mmu-miR-98     |
| 782   | 0.76 | 2.63x10 <sup>-1</sup> | 1.24  | -4.58 | 0.30  | mmu-miR-151-5p |
| 12441 | 0.76 | 2.63x10 <sup>-1</sup> | 1.24  | -4.58 | 0.37  | mmu-miR-22     |
| 11765 | 0.76 | 2.64x10 <sup>-1</sup> | 1.24  | -4.58 | 0.51  |                |
| 15406 | 0.76 | 2.64x10 <sup>-1</sup> | -1.24 | -4.58 | -0.50 | mmu-miR-672    |
| 1657  | 0.76 | 2.64x10 <sup>-1</sup> | -1.24 | -4.58 | -0.36 | mmu-miR-30a    |
| 15482 | 0.76 | 2.64x10 <sup>-1</sup> | -1.24 | -4.58 | -0.34 | mmu-miR-376c*  |
| 15479 | 0.76 | 2.65x10 <sup>-1</sup> | 1.23  | -4.58 | 0.58  | mmu-miR-141    |
| 9714  | 0.76 | 2.65x10 <sup>-1</sup> | 1.23  | -4.58 | 0.49  | mmu-miR-210    |
| 7235  | 0.76 | 2.66x10 <sup>-1</sup> | 1.23  | -4.58 | 0.41  |                |
| 5293  | 0.76 | 2.66x10 <sup>-1</sup> | 1.23  | -4.58 | 0.32  | mmu-miR-331-3p |
| 10198 | 0.76 | 2.66x10 <sup>-1</sup> | -1.23 | -4.58 | -0.45 | mmu-miR-30a*   |
| 1834  | 0.76 | 2.67x10 <sup>-1</sup> | 1.23  | -4.58 | 0.28  |                |
| 5102  | 0.76 | 2.68x10 <sup>-1</sup> | 1.23  | -4.58 | 0.61  | mmu-miR-29b    |
| 3426  | 0.76 | 2.68x10 <sup>-1</sup> | 1.23  | -4.58 | 0.88  | mmu-miR-29b    |
| 6145  | 0.76 | 2.69x10 <sup>-1</sup> | 1.22  | -4.58 | 0.39  | mmu-miR-151-5p |
| 3277  | 0.77 | 2.70x10 <sup>-1</sup> | 1.22  | -4.58 | 0.43  | mmu-miR-155    |

|       |      |                       |       |       |       |                 |
|-------|------|-----------------------|-------|-------|-------|-----------------|
| 15650 | 0.77 | $2.71 \times 10^{-1}$ | 1.22  | -4.58 | 0.49  | mmu-miR-709     |
| 2351  | 0.77 | $2.71 \times 10^{-1}$ | 1.22  | -4.58 | 0.63  | mmu-miR-653     |
| 9960  | 0.77 | $2.72 \times 10^{-1}$ | 1.21  | -4.58 | 0.91  | mmu-miR-543     |
| 14958 | 0.77 | $2.72 \times 10^{-1}$ | 1.21  | -4.58 | 0.29  | mmu-miR-24      |
| 8521  | 0.77 | $2.73 \times 10^{-1}$ | 1.21  | -4.58 | 1.56  | mmu-miR-574-5p  |
| 14481 | 0.77 | $2.73 \times 10^{-1}$ | 1.21  | -4.58 | 0.35  | mmu-miR-99b     |
| 7640  | 0.77 | $2.73 \times 10^{-1}$ | -1.21 | -4.58 | -0.88 | mmu-let-7a*     |
| 2568  | 0.77 | $2.74 \times 10^{-1}$ | 1.21  | -4.58 | 1.74  | mcmv-miR-m88-1* |
| 3622  | 0.77 | $2.74 \times 10^{-1}$ | -1.21 | -4.58 | -1.14 | mmu-let-7f*     |
| 4018  | 0.77 | $2.74 \times 10^{-1}$ | 1.21  | -4.58 | 0.80  | mmu-miR-23b     |
| 10241 | 0.77 | $2.75 \times 10^{-1}$ | -1.20 | -4.58 | -0.62 | mmu-miR-221     |
| 934   | 0.77 | $2.75 \times 10^{-1}$ | 1.20  | -4.58 | 0.54  | mmu-miR-18a     |
| 588   | 0.77 | $2.75 \times 10^{-1}$ | 1.20  | -4.58 | 0.55  | mmu-miR-196a    |
| 9016  | 0.77 | $2.76 \times 10^{-1}$ | 1.20  | -4.58 | 1.17  | mmu-miR-302b    |
| 3811  | 0.77 | $2.76 \times 10^{-1}$ | -1.20 | -4.58 | -0.85 | mghv-miR-M1-6   |
| 5957  | 0.77 | $2.77 \times 10^{-1}$ | 1.20  | -4.58 | 1.86  | mmu-miR-668     |
| 11175 | 0.77 | $2.77 \times 10^{-1}$ | 1.20  | -4.58 | 0.43  |                 |
| 2992  | 0.78 | $2.77 \times 10^{-1}$ | 1.20  | -4.58 | 0.40  | mmu-miR-106b    |
| 9178  | 0.78 | $2.78 \times 10^{-1}$ | -1.20 | -4.59 | -0.96 | mmu-miR-10b     |
| 11460 | 0.78 | $2.79 \times 10^{-1}$ | 1.19  | -4.59 | 1.08  |                 |
| 6015  | 0.78 | $2.79 \times 10^{-1}$ | 1.19  | -4.59 | 0.33  | mmu-miR-16      |
| 8829  | 0.78 | $2.80 \times 10^{-1}$ | -1.19 | -4.59 | -1.08 | mmu-miR-741     |
| 15233 | 0.78 | $2.80 \times 10^{-1}$ | -1.19 | -4.59 | -0.98 | mmu-miR-425*    |
| 12946 | 0.78 | $2.80 \times 10^{-1}$ | 1.19  | -4.59 | 0.39  |                 |
| 7358  | 0.78 | $2.80 \times 10^{-1}$ | 1.19  | -4.59 | 0.43  | mmu-miR-193b    |
| 7210  | 0.78 | $2.81 \times 10^{-1}$ | 1.19  | -4.59 | 1.38  | mmu-miR-1187    |
| 5857  | 0.78 | $2.81 \times 10^{-1}$ | 1.19  | -4.59 | 0.34  | mmu-miR-23a     |
| 4958  | 0.78 | $2.82 \times 10^{-1}$ | 1.19  | -4.59 | 1.00  | mmu-miR-181d    |
| 2494  | 0.78 | $2.84 \times 10^{-1}$ | 1.18  | -4.59 | 0.29  |                 |
| 9792  | 0.78 | $2.84 \times 10^{-1}$ | 1.18  | -4.59 | 0.59  | mmu-miR-469     |
| 10857 | 0.78 | $2.84 \times 10^{-1}$ | -1.18 | -4.59 | -0.36 | mmu-miR-10b     |
| 704   | 0.78 | $2.84 \times 10^{-1}$ | 1.18  | -4.59 | 0.39  | mmu-miR-19b     |
| 196   | 0.78 | $2.84 \times 10^{-1}$ | 1.18  | -4.59 | 0.45  | mmu-miR-23a     |
| 5550  | 0.79 | $2.86 \times 10^{-1}$ | 1.17  | -4.59 | 0.33  | mmu-miR-22      |
| 6512  | 0.79 | $2.87 \times 10^{-1}$ | 1.17  | -4.59 | 0.49  | mmu-miR-130b    |
| 11228 | 0.79 | $2.87 \times 10^{-1}$ | -1.17 | -4.59 | -0.31 | mmu-miR-652     |
| 3309  | 0.79 | $2.88 \times 10^{-1}$ | 1.17  | -4.59 | 0.62  | mmu-miR-223     |
| 8184  | 0.79 | $2.88 \times 10^{-1}$ | -1.17 | -4.59 | -0.58 | mmu-let-7b*     |
| 11152 | 0.79 | $2.89 \times 10^{-1}$ | 1.17  | -4.59 | 0.72  | mmu-miR-298     |
| 6044  | 0.79 | $2.89 \times 10^{-1}$ | 1.17  | -4.59 | 0.33  | mmu-miR-23a     |
| 11606 | 0.79 | $2.90 \times 10^{-1}$ | 1.17  | -4.59 | 0.35  | mmu-miR-29c     |
| 8938  | 0.79 | $2.90 \times 10^{-1}$ | 1.16  | -4.59 | 1.09  | mmu-miR-197     |
| 12608 | 0.79 | $2.91 \times 10^{-1}$ | 1.16  | -4.59 | 0.81  | mmu-miR-29b     |
| 11536 | 0.79 | $2.91 \times 10^{-1}$ | -1.16 | -4.59 | -0.92 | mmu-miR-466j    |
| 3574  | 0.79 | $2.92 \times 10^{-1}$ | -1.16 | -4.59 | -1.29 | mmu-miR-130b*   |
| 13659 | 0.79 | $2.92 \times 10^{-1}$ | 1.16  | -4.59 | 2.07  | mmu-miR-574-5p  |

|       |      |                       |       |       |       |                 |
|-------|------|-----------------------|-------|-------|-------|-----------------|
| 11489 | 0.79 | 2.92x10 <sup>-1</sup> | 1.16  | -4.59 | 0.83  | mmu-miR-1897-5p |
| 422   | 0.79 | 2.93x10 <sup>-1</sup> | 1.16  | -4.59 | 1.17  | mmu-miR-423-5p  |
| 6174  | 0.79 | 2.93x10 <sup>-1</sup> | 1.16  | -4.59 | 1.03  | mmu-miR-100     |
| 14661 | 0.79 | 2.94x10 <sup>-1</sup> | -1.15 | -4.59 | -0.73 | mmu-miR-195     |
| 5366  | 0.79 | 2.94x10 <sup>-1</sup> | 1.15  | -4.59 | 0.37  | mmu-miR-106b    |
| 5551  | 0.79 | 2.94x10 <sup>-1</sup> | -1.15 | -4.59 | -0.46 | mmu-miR-185     |
| 9364  | 0.79 | 2.94x10 <sup>-1</sup> | 1.15  | -4.59 | 1.44  | mmu-miR-21*     |
| 7105  | 0.79 | 2.95x10 <sup>-1</sup> | -1.15 | -4.59 | -0.51 | mmu-miR-152     |
| 8786  | 0.79 | 2.95x10 <sup>-1</sup> | 1.15  | -4.59 | 0.78  | mmu-miR-99b     |
| 8739  | 0.79 | 2.96x10 <sup>-1</sup> | 1.15  | -4.59 | 0.47  |                 |
| 9599  | 0.79 | 2.96x10 <sup>-1</sup> | 1.15  | -4.59 | 0.32  | mmu-miR-16      |
| 11483 | 0.79 | 2.96x10 <sup>-1</sup> | 1.15  | -4.59 | 0.45  | mmu-miR-741     |
| 728   | 0.79 | 2.96x10 <sup>-1</sup> | 1.15  | -4.59 | 0.58  | mmu-miR-222     |
| 10364 | 0.79 | 2.96x10 <sup>-1</sup> | -1.15 | -4.59 | -0.85 | mmu-miR-30a*    |
| 12609 | 0.79 | 2.96x10 <sup>-1</sup> | 1.15  | -4.59 | 0.31  | mmu-miR-23a     |
| 15419 | 0.79 | 2.97x10 <sup>-1</sup> | 1.15  | -4.59 | 0.26  | mmu-miR-196b    |
| 10835 | 0.79 | 2.97x10 <sup>-1</sup> | 1.15  | -4.59 | 0.27  | mmu-miR-23a     |
| 7098  | 0.79 | 2.98x10 <sup>-1</sup> | 1.14  | -4.59 | 0.36  |                 |
| 11079 | 0.79 | 2.98x10 <sup>-1</sup> | 1.14  | -4.59 | 0.40  | mmu-miR-365     |
| 14411 | 0.79 | 2.98x10 <sup>-1</sup> | 1.14  | -4.59 | 0.87  | mmu-miR-181a    |
| 13764 | 0.79 | 2.98x10 <sup>-1</sup> | 1.14  | -4.59 | 0.37  | mmu-miR-140     |
| 9605  | 0.79 | 2.98x10 <sup>-1</sup> | -1.14 | -4.59 | -0.80 | mmu-let-7b*     |
| 4219  | 0.79 | 2.98x10 <sup>-1</sup> | -1.14 | -4.59 | -0.31 | mmu-miR-27b     |
| 4399  | 0.79 | 2.99x10 <sup>-1</sup> | -1.14 | -4.59 | -0.70 |                 |
| 14429 | 0.79 | 2.99x10 <sup>-1</sup> | 1.14  | -4.59 | 0.96  | mmu-miR-374     |
| 7818  | 0.80 | 3.00x10 <sup>-1</sup> | 1.14  | -4.59 | 1.28  | mmu-miR-30e*    |
| 11143 | 0.80 | 3.00x10 <sup>-1</sup> | 1.14  | -4.59 | 1.16  | mmu-miR-1904    |
| 5869  | 0.80 | 3.00x10 <sup>-1</sup> | 1.14  | -4.59 | 0.32  | mmu-miR-28      |
| 10532 | 0.80 | 3.01x10 <sup>-1</sup> | -1.14 | -4.59 | -0.46 | mmu-let-7f*     |
| 5524  | 0.80 | 3.01x10 <sup>-1</sup> | 1.14  | -4.59 | 0.57  | mmu-miR-29b     |
| 5328  | 0.80 | 3.02x10 <sup>-1</sup> | 1.13  | -4.59 | 1.50  | mmu-miR-34c     |
| 5112  | 0.80 | 3.02x10 <sup>-1</sup> | 1.13  | -4.59 | 0.47  | mmu-miR-136     |
| 11063 | 0.80 | 3.02x10 <sup>-1</sup> | -1.13 | -4.59 | -0.39 | mmu-miR-27b     |
| 5861  | 0.80 | 3.02x10 <sup>-1</sup> | -1.13 | -4.59 | -0.32 | mmu-miR-324-5p  |
| 11856 | 0.80 | 3.03x10 <sup>-1</sup> | 1.13  | -4.59 | 0.28  | mmu-miR-23a     |
| 3800  | 0.80 | 3.03x10 <sup>-1</sup> | 1.13  | -4.59 | 0.77  |                 |
| 7249  | 0.80 | 3.03x10 <sup>-1</sup> | 1.13  | -4.59 | 0.37  | mmu-miR-140     |
| 11467 | 0.80 | 3.03x10 <sup>-1</sup> | 1.13  | -4.59 | 1.57  | mmu-miR-376b*   |
| 10638 | 0.80 | 3.04x10 <sup>-1</sup> | 1.13  | -4.59 | 0.38  | mmu-miR-210     |
| 9053  | 0.80 | 3.04x10 <sup>-1</sup> | 1.13  | -4.59 | 0.68  | mmu-miR-365     |
| 11440 | 0.80 | 3.04x10 <sup>-1</sup> | 1.13  | -4.59 | 0.33  |                 |
| 5470  | 0.80 | 3.04x10 <sup>-1</sup> | 1.13  | -4.59 | 1.44  | mmu-miR-140*    |
| 12219 | 0.80 | 3.04x10 <sup>-1</sup> | -1.13 | -4.59 | -0.53 | mmu-miR-290-3p  |
| 8375  | 0.80 | 3.05x10 <sup>-1</sup> | 1.12  | -4.59 | 0.66  |                 |
| 1105  | 0.80 | 3.07x10 <sup>-1</sup> | 1.12  | -4.59 | 0.37  |                 |
| 11126 | 0.80 | 3.07x10 <sup>-1</sup> | 1.12  | -4.59 | 0.35  | mmu-miR-331-3p  |

|       |      |                       |       |       |       |                 |
|-------|------|-----------------------|-------|-------|-------|-----------------|
| 15252 | 0.80 | $3.08 \times 10^{-1}$ | 1.12  | -4.59 | 0.34  |                 |
| 5532  | 0.80 | $3.08 \times 10^{-1}$ | 1.12  | -4.59 | 0.47  | mmu-miR-223     |
| 6944  | 0.80 | $3.11 \times 10^{-1}$ | -1.11 | -4.59 | -0.48 | mmu-miR-290-3p  |
| 10578 | 0.80 | $3.11 \times 10^{-1}$ | 1.11  | -4.59 | 0.63  | mmu-miR-29b     |
| 740   | 0.80 | $3.11 \times 10^{-1}$ | 1.11  | -4.59 | 0.67  | mmu-miR-302a    |
| 13022 | 0.80 | $3.12 \times 10^{-1}$ | -1.11 | -4.59 | -0.48 | mmu-miR-30a*    |
| 15512 | 0.80 | $3.12 \times 10^{-1}$ | 1.11  | -4.59 | 0.25  |                 |
| 1675  | 0.80 | $3.13 \times 10^{-1}$ | 1.11  | -4.59 | 0.27  | mmu-miR-23a     |
| 10077 | 0.80 | $3.13 \times 10^{-1}$ | 1.11  | -4.59 | 0.58  | mmu-miR-20a     |
| 8878  | 0.80 | $3.13 \times 10^{-1}$ | 1.10  | -4.59 | 0.27  | mmu-miR-103     |
| 13126 | 0.80 | $3.13 \times 10^{-1}$ | 1.10  | -4.59 | 0.28  | mmu-miR-27a     |
| 5534  | 0.80 | $3.14 \times 10^{-1}$ | 1.10  | -4.59 | 0.96  | mmu-miR-672     |
| 15008 | 0.80 | $3.14 \times 10^{-1}$ | 1.10  | -4.59 | 1.24  | mmu-miR-1187    |
| 9488  | 0.80 | $3.14 \times 10^{-1}$ | 1.10  | -4.59 | 0.34  | mmu-miR-125a-5p |
| 8834  | 0.80 | $3.14 \times 10^{-1}$ | 1.10  | -4.59 | 1.20  | mmu-miR-574-5p  |
| 13252 | 0.80 | $3.14 \times 10^{-1}$ | 1.10  | -4.59 | 0.44  | mmu-miR-877*    |
| 14503 | 0.80 | $3.15 \times 10^{-1}$ | -1.10 | -4.59 | -0.71 | mmu-miR-471     |
| 10656 | 0.80 | $3.15 \times 10^{-1}$ | 1.10  | -4.59 | 0.30  |                 |
| 10354 | 0.80 | $3.15 \times 10^{-1}$ | 1.10  | -4.59 | 1.42  | mmu-miR-29b     |
| 15531 | 0.80 | $3.15 \times 10^{-1}$ | -1.10 | -4.59 | -0.51 | mmu-miR-542-5p  |
| 5860  | 0.80 | $3.15 \times 10^{-1}$ | 1.10  | -4.59 | 0.36  |                 |
| 7714  | 0.80 | $3.15 \times 10^{-1}$ | 1.10  | -4.59 | 0.90  | mmu-miR-30e*    |
| 12058 | 0.80 | $3.15 \times 10^{-1}$ | 1.10  | -4.59 | 0.57  |                 |
| 9350  | 0.80 | $3.16 \times 10^{-1}$ | 1.10  | -4.59 | 0.55  | mmu-miR-181a    |
| 9709  | 0.80 | $3.16 \times 10^{-1}$ | 1.10  | -4.59 | 0.32  | mmu-miR-425     |
| 12714 | 0.80 | $3.16 \times 10^{-1}$ | 1.10  | -4.59 | 0.26  | mmu-let-7c      |
| 1024  | 0.80 | $3.16 \times 10^{-1}$ | 1.10  | -4.59 | 0.55  | mmu-miR-669a    |
| 1056  | 0.80 | $3.17 \times 10^{-1}$ | 1.10  | -4.59 | 0.84  | mmu-miR-483*    |
| 13004 | 0.80 | $3.17 \times 10^{-1}$ | 1.09  | -4.59 | 0.34  | mmu-miR-196a    |
| 2023  | 0.80 | $3.17 \times 10^{-1}$ | -1.09 | -4.59 | -1.73 | mmu-miR-451     |
| 11084 | 0.80 | $3.17 \times 10^{-1}$ | 1.09  | -4.59 | 0.59  | mghv-miR-M1-2   |
| 14127 | 0.80 | $3.18 \times 10^{-1}$ | 1.09  | -4.59 | 0.27  |                 |
| 3681  | 0.80 | $3.18 \times 10^{-1}$ | 1.09  | -4.59 | 1.86  | mmu-miR-672     |
| 2313  | 0.80 | $3.18 \times 10^{-1}$ | 1.09  | -4.59 | 0.40  | mmu-miR-497     |
| 2006  | 0.80 | $3.18 \times 10^{-1}$ | 1.09  | -4.59 | 0.31  | mmu-miR-872     |
| 15048 | 0.80 | $3.19 \times 10^{-1}$ | 1.09  | -4.59 | 0.95  | mmu-miR-715     |
| 10201 | 0.80 | $3.19 \times 10^{-1}$ | -1.09 | -4.59 | -0.33 | mmu-miR-98      |
| 2235  | 0.80 | $3.19 \times 10^{-1}$ | 1.09  | -4.59 | 0.68  | mmu-miR-20b     |
| 2933  | 0.80 | $3.20 \times 10^{-1}$ | -1.09 | -4.59 | -0.33 | mmu-miR-30a     |
| 4337  | 0.80 | $3.20 \times 10^{-1}$ | 1.09  | -4.59 | 0.48  | mmu-miR-128     |
| 9253  | 0.80 | $3.20 \times 10^{-1}$ | -1.09 | -4.59 | -0.84 | mmu-miR-18a     |
| 1945  | 0.80 | $3.21 \times 10^{-1}$ | -1.09 | -4.59 | -0.32 | mmu-miR-30a     |
| 11529 | 0.80 | $3.21 \times 10^{-1}$ | -1.09 | -4.59 | -0.64 | mmu-miR-741     |
| 417   | 0.80 | $3.21 \times 10^{-1}$ | 1.08  | -4.59 | 0.75  | mmu-miR-709     |
| 10040 | 0.81 | $3.22 \times 10^{-1}$ | 1.08  | -4.59 | 0.37  | mmu-miR-872     |
| 12521 | 0.81 | $3.22 \times 10^{-1}$ | -1.08 | -4.59 | -0.33 | mmu-miR-98      |

|       |      |                       |       |       |       |                 |
|-------|------|-----------------------|-------|-------|-------|-----------------|
| 328   | 0.81 | $3.23 \times 10^{-1}$ | -1.08 | -4.59 | -0.90 |                 |
| 7382  | 0.81 | $3.23 \times 10^{-1}$ | 1.08  | -4.59 | 0.65  | mmu-miR-221     |
| 7450  | 0.81 | $3.23 \times 10^{-1}$ | -1.08 | -4.59 | -0.89 | mghv-miR-M1-1   |
| 9036  | 0.81 | $3.24 \times 10^{-1}$ | 1.08  | -4.59 | 0.61  | mmu-miR-29c     |
| 14339 | 0.81 | $3.24 \times 10^{-1}$ | 1.08  | -4.59 | 1.00  | mmu-miR-547     |
| 14549 | 0.81 | $3.24 \times 10^{-1}$ | 1.08  | -4.59 | 0.49  |                 |
| 7530  | 0.81 | $3.25 \times 10^{-1}$ | -1.08 | -4.59 | -0.28 | mmu-miR-23b     |
| 14072 | 0.81 | $3.25 \times 10^{-1}$ | -1.07 | -4.59 | -2.36 | mmu-miR-483*    |
| 1851  | 0.81 | $3.26 \times 10^{-1}$ | -1.07 | -4.59 | -0.46 | mmu-miR-31*     |
| 7932  | 0.81 | $3.27 \times 10^{-1}$ | 1.07  | -4.59 | 1.29  | mmu-miR-574-5p  |
| 1135  | 0.81 | $3.28 \times 10^{-1}$ | 1.07  | -4.59 | 1.12  | mmu-miR-503     |
| 14004 | 0.81 | $3.28 \times 10^{-1}$ | -1.07 | -4.59 | -0.73 |                 |
| 4281  | 0.81 | $3.28 \times 10^{-1}$ | 1.07  | -4.59 | 0.29  | mmu-miR-16      |
| 6511  | 0.81 | $3.29 \times 10^{-1}$ | 1.07  | -4.59 | 0.30  | mmu-miR-345-5p  |
| 348   | 0.81 | $3.29 \times 10^{-1}$ | 1.07  | -4.59 | 0.47  |                 |
| 137   | 0.81 | $3.29 \times 10^{-1}$ | 1.06  | -4.59 | 1.12  | mmu-miR-574-5p  |
| 9757  | 0.81 | $3.30 \times 10^{-1}$ | 1.06  | -4.59 | 0.34  |                 |
| 1     | 0.81 | $3.30 \times 10^{-1}$ | 1.06  | -4.59 | 0.52  |                 |
| 7837  | 0.81 | $3.30 \times 10^{-1}$ | 1.06  | -4.59 | 0.49  | mmu-miR-130b    |
| 12162 | 0.81 | $3.30 \times 10^{-1}$ | 1.06  | -4.59 | 0.33  | mmu-miR-106b    |
| 7892  | 0.81 | $3.30 \times 10^{-1}$ | 1.06  | -4.59 | 0.26  | mmu-miR-322     |
| 2520  | 0.81 | $3.31 \times 10^{-1}$ | 1.06  | -4.59 | 0.80  | mmu-miR-193     |
| 1982  | 0.81 | $3.31 \times 10^{-1}$ | 1.06  | -4.59 | 1.03  | mmu-miR-374*    |
| 4015  | 0.81 | $3.32 \times 10^{-1}$ | 1.06  | -4.59 | 0.30  |                 |
| 9771  | 0.81 | $3.32 \times 10^{-1}$ | 1.06  | -4.59 | 0.32  | mmu-miR-151-5p  |
| 3407  | 0.81 | $3.32 \times 10^{-1}$ | 1.06  | -4.59 | 0.34  |                 |
| 6156  | 0.81 | $3.32 \times 10^{-1}$ | 1.06  | -4.59 | 0.44  | mmu-miR-106b    |
| 15530 | 0.81 | $3.32 \times 10^{-1}$ | 1.06  | -4.59 | 0.69  | mmu-miR-193     |
| 10596 | 0.81 | $3.32 \times 10^{-1}$ | 1.06  | -4.59 | 0.35  |                 |
| 13170 | 0.81 | $3.33 \times 10^{-1}$ | 1.06  | -4.59 | 1.24  | mmu-miR-34c*    |
| 9563  | 0.81 | $3.33 \times 10^{-1}$ | 1.05  | -4.59 | 1.00  | mmu-miR-291b-5p |
| 6765  | 0.81 | $3.34 \times 10^{-1}$ | 1.05  | -4.59 | 0.96  | mmu-miR-30b*    |
| 14430 | 0.81 | $3.34 \times 10^{-1}$ | -1.05 | -4.59 | -0.85 | mmu-let-7d*     |
| 3631  | 0.81 | $3.34 \times 10^{-1}$ | 1.05  | -4.59 | 0.93  | mmu-miR-1892    |
| 7732  | 0.81 | $3.34 \times 10^{-1}$ | 1.05  | -4.59 | 0.26  | mmu-miR-331-3p  |
| 10510 | 0.81 | $3.34 \times 10^{-1}$ | 1.05  | -4.59 | 0.30  | mmu-miR-345-5p  |
| 15062 | 0.81 | $3.34 \times 10^{-1}$ | 1.05  | -4.59 | 0.26  | mmu-miR-361     |
| 12350 | 0.81 | $3.35 \times 10^{-1}$ | -1.05 | -4.59 | -1.05 | mmu-miR-615-3p  |
| 2510  | 0.81 | $3.35 \times 10^{-1}$ | 1.05  | -4.59 | 1.08  | mmu-miR-30c-1*  |
| 753   | 0.81 | $3.35 \times 10^{-1}$ | 1.05  | -4.59 | 0.33  |                 |
| 12345 | 0.81 | $3.35 \times 10^{-1}$ | 1.05  | -4.59 | 0.29  | mmu-miR-151-5p  |
| 5154  | 0.81 | $3.35 \times 10^{-1}$ | -1.05 | -4.59 | -0.39 |                 |
| 14815 | 0.81 | $3.35 \times 10^{-1}$ | 1.05  | -4.59 | 0.40  | mmu-miR-196b    |
| 510   | 0.81 | $3.36 \times 10^{-1}$ | 1.05  | -4.59 | 0.36  | mmu-miR-106b    |
| 432   | 0.81 | $3.36 \times 10^{-1}$ | 1.05  | -4.59 | 0.50  | mmu-miR-29b     |
| 9422  | 0.81 | $3.37 \times 10^{-1}$ | 1.05  | -4.59 | 0.30  | mmu-miR-27a     |



|       |      |                       |       |       |       |                 |
|-------|------|-----------------------|-------|-------|-------|-----------------|
| 8391  | 0.81 | $3.37 \times 10^{-1}$ | -1.05 | -4.59 | -0.29 | mmu-miR-30a     |
| 6036  | 0.81 | $3.37 \times 10^{-1}$ | 1.05  | -4.59 | 0.27  |                 |
| 9521  | 0.81 | $3.37 \times 10^{-1}$ | -1.05 | -4.59 | -0.45 | mmu-miR-503     |
| 164   | 0.81 | $3.37 \times 10^{-1}$ | 1.05  | -4.59 | 0.39  |                 |
| 7515  | 0.81 | $3.38 \times 10^{-1}$ | 1.04  | -4.59 | 0.33  | mmu-miR-155     |
| 3323  | 0.81 | $3.38 \times 10^{-1}$ | 1.04  | -4.59 | 1.86  | mmu-miR-590-3p  |
| 5914  | 0.81 | $3.38 \times 10^{-1}$ | -1.04 | -4.59 | -0.76 | mmu-miR-425     |
| 14157 | 0.81 | $3.38 \times 10^{-1}$ | 1.04  | -4.59 | 1.25  | mmu-miR-149     |
| 1455  | 0.81 | $3.39 \times 10^{-1}$ | 1.04  | -4.59 | 0.91  | mmu-miR-697     |
| 8009  | 0.81 | $3.39 \times 10^{-1}$ | 1.04  | -4.59 | 0.79  |                 |
| 4283  | 0.81 | $3.39 \times 10^{-1}$ | 1.04  | -4.59 | 0.56  | mmu-miR-29b     |
| 7321  | 0.81 | $3.40 \times 10^{-1}$ | -1.04 | -4.59 | -0.62 | mmu-miR-290-3p  |
| 946   | 0.81 | $3.40 \times 10^{-1}$ | 1.04  | -4.59 | 0.42  | mmu-miR-18a     |
| 11273 | 0.81 | $3.41 \times 10^{-1}$ | 1.04  | -4.59 | 0.25  | mmu-miR-28      |
| 12905 | 0.81 | $3.41 \times 10^{-1}$ | -1.04 | -4.59 | -0.90 |                 |
| 14646 | 0.81 | $3.43 \times 10^{-1}$ | 1.03  | -4.59 | 0.70  | mmu-miR-365     |
| 8725  | 0.81 | $3.43 \times 10^{-1}$ | 1.03  | -4.59 | 0.22  |                 |
| 7189  | 0.81 | $3.44 \times 10^{-1}$ | -1.03 | -4.59 | -0.35 |                 |
| 15326 | 0.81 | $3.44 \times 10^{-1}$ | -1.03 | -4.59 | -1.05 | mmu-miR-224     |
| 5864  | 0.81 | $3.44 \times 10^{-1}$ | 1.03  | -4.59 | 0.27  | mmu-miR-23a     |
| 11408 | 0.81 | $3.44 \times 10^{-1}$ | 1.03  | -4.59 | 0.37  | mmu-miR-210     |
| 2744  | 0.81 | $3.45 \times 10^{-1}$ | 1.03  | -4.59 | 0.29  | mmu-let-7b      |
| 12255 | 0.81 | $3.45 \times 10^{-1}$ | 1.03  | -4.59 | 0.23  |                 |
| 14134 | 0.81 | $3.46 \times 10^{-1}$ | -1.03 | -4.59 | -0.34 | mmu-miR-27b     |
| 10988 | 0.81 | $3.46 \times 10^{-1}$ | 1.03  | -4.59 | 0.83  | mmu-miR-423-5p  |
| 10332 | 0.81 | $3.46 \times 10^{-1}$ | -1.03 | -4.59 | -0.87 | mmu-miR-30e*    |
| 8543  | 0.81 | $3.46 \times 10^{-1}$ | -1.03 | -4.59 | -0.90 | mmu-miR-7b      |
| 7841  | 0.81 | $3.46 \times 10^{-1}$ | -1.03 | -4.59 | -0.48 | mmu-miR-425     |
| 14162 | 0.81 | $3.46 \times 10^{-1}$ | 1.03  | -4.59 | 0.45  | mmu-let-7b*     |
| 6863  | 0.81 | $3.46 \times 10^{-1}$ | 1.02  | -4.59 | 0.44  | mmu-miR-291b-5p |
| 3025  | 0.81 | $3.47 \times 10^{-1}$ | -1.02 | -4.59 | -1.03 | mmu-miR-425*    |
| 12481 | 0.81 | $3.47 \times 10^{-1}$ | 1.02  | -4.59 | 1.22  | mmu-miR-1187    |
| 14280 | 0.81 | $3.47 \times 10^{-1}$ | 1.02  | -4.59 | 0.32  | mmu-miR-196a    |
| 1067  | 0.81 | $3.47 \times 10^{-1}$ | -1.02 | -4.59 | -0.54 | mmu-miR-202-5p  |
| 6724  | 0.81 | $3.48 \times 10^{-1}$ | -1.02 | -4.59 | -0.52 |                 |
| 9385  | 0.81 | $3.48 \times 10^{-1}$ | -1.02 | -4.59 | -0.38 | mmu-miR-27b     |
| 12777 | 0.81 | $3.48 \times 10^{-1}$ | 1.02  | -4.59 | 0.28  | mmu-miR-23a     |
| 9884  | 0.81 | $3.49 \times 10^{-1}$ | 1.02  | -4.59 | 0.24  | mmu-miR-196b    |
| 12737 | 0.81 | $3.49 \times 10^{-1}$ | 1.02  | -4.60 | 0.29  | mmu-let-7b      |
| 9117  | 0.81 | $3.50 \times 10^{-1}$ | 1.02  | -4.60 | 0.44  | mmu-miR-19b     |
| 13786 | 0.81 | $3.51 \times 10^{-1}$ | 1.01  | -4.60 | 0.38  | mmu-miR-10b     |
| 2429  | 0.81 | $3.51 \times 10^{-1}$ | 1.01  | -4.60 | 0.25  | mmu-miR-301a    |
| 7643  | 0.81 | $3.51 \times 10^{-1}$ | 1.01  | -4.60 | 0.49  | mmu-miR-296-5p  |
| 12011 | 0.81 | $3.52 \times 10^{-1}$ | -1.01 | -4.60 | -0.55 | mmu-miR-92b     |
| 1778  | 0.81 | $3.52 \times 10^{-1}$ | 1.01  | -4.60 | 0.48  | mmu-miR-29b     |
| 11466 | 0.81 | $3.52 \times 10^{-1}$ | -1.01 | -4.60 | -0.33 | mmu-miR-674*    |

|       |      |                       |       |       |       |                |
|-------|------|-----------------------|-------|-------|-------|----------------|
| 10932 | 0.81 | $3.52 \times 10^{-1}$ | 1.01  | -4.60 | 0.35  | mmu-let-7f*    |
| 8063  | 0.81 | $3.53 \times 10^{-1}$ | 1.01  | -4.60 | 0.36  | mmu-miR-106b   |
| 15084 | 0.81 | $3.54 \times 10^{-1}$ | -1.01 | -4.60 | -0.24 | mmu-miR-324-5p |
| 13897 | 0.81 | $3.54 \times 10^{-1}$ | 1.01  | -4.60 | 0.27  | mmu-miR-151-5p |
| 13953 | 0.81 | $3.54 \times 10^{-1}$ | 1.01  | -4.60 | 0.26  | mmu-miR-24     |
| 14777 | 0.81 | $3.54 \times 10^{-1}$ | 1.01  | -4.60 | 0.25  | mmu-miR-140    |
| 12939 | 0.81 | $3.55 \times 10^{-1}$ | -1.01 | -4.60 | -0.38 | mmu-miR-365    |
| 7909  | 0.81 | $3.55 \times 10^{-1}$ | 1.01  | -4.60 | 0.60  | mmu-miR-672    |
| 11741 | 0.81 | $3.55 \times 10^{-1}$ | 1.01  | -4.60 | 0.27  |                |
| 6958  | 0.81 | $3.55 \times 10^{-1}$ | 1.00  | -4.60 | 0.26  |                |
| 14523 | 0.81 | $3.55 \times 10^{-1}$ | 1.00  | -4.60 | 0.34  | mmu-miR-196a   |
| 12763 | 0.81 | $3.55 \times 10^{-1}$ | 1.00  | -4.60 | 0.30  |                |
| 10370 | 0.81 | $3.56 \times 10^{-1}$ | 1.00  | -4.60 | 0.92  |                |
| 3989  | 0.81 | $3.56 \times 10^{-1}$ | 1.00  | -4.60 | 0.25  | mmu-miR-28     |
| 2898  | 0.81 | $3.57 \times 10^{-1}$ | 1.00  | -4.60 | 0.28  | mmu-miR-16     |
| 6616  | 0.81 | $3.57 \times 10^{-1}$ | 1.00  | -4.60 | 0.25  | mmu-miR-16     |
| 8670  | 0.81 | $3.58 \times 10^{-1}$ | -1.00 | -4.60 | -0.69 | mmu-miR-30c    |
| 15119 | 0.81 | $3.58 \times 10^{-1}$ | 1.00  | -4.60 | 0.34  |                |
| 3428  | 0.81 | $3.58 \times 10^{-1}$ | 1.00  | -4.60 | 0.36  | mmu-miR-210    |
| 9514  | 0.81 | $3.58 \times 10^{-1}$ | 1.00  | -4.60 | 0.33  | mmu-miR-296-5p |
| 13549 | 0.81 | $3.58 \times 10^{-1}$ | 1.00  | -4.60 | 0.29  | mmu-miR-151-5p |
| 10808 | 0.81 | $3.58 \times 10^{-1}$ | 1.00  | -4.60 | 0.30  | mmu-miR-149    |
| 13743 | 0.81 | $3.59 \times 10^{-1}$ | 1.00  | -4.60 | 0.26  |                |
| 2886  | 0.81 | $3.59 \times 10^{-1}$ | 1.00  | -4.60 | 0.33  | mmu-miR-106b   |
| 3667  | 0.81 | $3.59 \times 10^{-1}$ | 1.00  | -4.60 | 0.56  | mmu-miR-290-3p |
| 6862  | 0.81 | $3.60 \times 10^{-1}$ | 0.99  | -4.60 | 0.46  | mmu-miR-18a    |
| 9040  | 0.81 | $3.60 \times 10^{-1}$ | 0.99  | -4.60 | 0.85  | mmu-miR-18a    |
| 6037  | 0.81 | $3.60 \times 10^{-1}$ | 0.99  | -4.60 | 0.39  | mmu-miR-193b   |
| 9129  | 0.81 | $3.61 \times 10^{-1}$ | 0.99  | -4.60 | 0.62  | mmu-miR-223    |
| 1418  | 0.81 | $3.61 \times 10^{-1}$ | 0.99  | -4.60 | 0.31  | mmu-miR-20b    |
| 11722 | 0.81 | $3.61 \times 10^{-1}$ | -0.99 | -4.60 | -0.25 | mmu-miR-30a    |
| 15142 | 0.81 | $3.61 \times 10^{-1}$ | 0.99  | -4.60 | 0.25  | mmu-let-7i     |
| 12578 | 0.81 | $3.61 \times 10^{-1}$ | 0.99  | -4.60 | 0.33  | mmu-miR-106b   |
| 2308  | 0.81 | $3.61 \times 10^{-1}$ | 0.99  | -4.60 | 0.33  | mmu-miR-106b   |
| 2794  | 0.81 | $3.61 \times 10^{-1}$ | 0.99  | -4.60 | 1.14  | mmu-miR-22*    |
| 4151  | 0.81 | $3.61 \times 10^{-1}$ | 0.99  | -4.60 | 0.60  | mmu-let-7a*    |
| 10686 | 0.81 | $3.62 \times 10^{-1}$ | 0.99  | -4.60 | 0.59  | mmu-miR-221    |
| 10499 | 0.81 | $3.62 \times 10^{-1}$ | 0.99  | -4.60 | 0.26  | mmu-miR-331-3p |
| 11122 | 0.81 | $3.64 \times 10^{-1}$ | 0.99  | -4.60 | 0.24  |                |
| 15539 | 0.81 | $3.64 \times 10^{-1}$ | 0.99  | -4.60 | 0.40  | mmu-miR-92a    |
| 8036  | 0.81 | $3.64 \times 10^{-1}$ | 0.98  | -4.60 | 1.77  | mmu-miR-1-2-as |
| 11504 | 0.81 | $3.65 \times 10^{-1}$ | 0.98  | -4.60 | 0.97  | mmu-miR-872    |
| 4535  | 0.81 | $3.65 \times 10^{-1}$ | 0.98  | -4.60 | 0.35  | mmu-miR-210    |
| 6329  | 0.81 | $3.65 \times 10^{-1}$ | 0.98  | -4.60 | 0.31  | mmu-miR-331-3p |
| 6969  | 0.81 | $3.65 \times 10^{-1}$ | 0.98  | -4.60 | 0.52  | mmu-miR-449a   |
| 10092 | 0.81 | $3.65 \times 10^{-1}$ | 0.98  | -4.60 | 0.34  | mmu-miR-155    |

|       |      |                       |       |       |       |                 |
|-------|------|-----------------------|-------|-------|-------|-----------------|
| 5236  | 0.81 | $3.66 \times 10^{-1}$ | -0.98 | -4.60 | -0.55 | mmu-miR-302b    |
| 3381  | 0.81 | $3.66 \times 10^{-1}$ | 0.98  | -4.60 | 0.59  | mmu-miR-425     |
| 4732  | 0.81 | $3.66 \times 10^{-1}$ | 0.98  | -4.60 | 0.52  | mmu-miR-29b     |
| 4349  | 0.81 | $3.66 \times 10^{-1}$ | 0.98  | -4.60 | 0.28  | mmu-miR-423-5p  |
| 865   | 0.81 | $3.66 \times 10^{-1}$ | 0.98  | -4.60 | 0.30  | mmu-let-7e      |
| 6028  | 0.81 | $3.67 \times 10^{-1}$ | 0.98  | -4.60 | 0.39  | mmu-miR-193b    |
| 11418 | 0.81 | $3.67 \times 10^{-1}$ | 0.98  | -4.60 | 0.36  | mmu-miR-103     |
| 7895  | 0.81 | $3.67 \times 10^{-1}$ | -0.98 | -4.60 | -1.18 | mmu-miR-31*     |
| 5979  | 0.81 | $3.67 \times 10^{-1}$ | 0.98  | -4.60 | 0.30  | mmu-miR-23a     |
| 10284 | 0.81 | $3.67 \times 10^{-1}$ | 0.98  | -4.60 | 0.29  | mmu-miR-31*     |
| 4313  | 0.81 | $3.68 \times 10^{-1}$ | 0.98  | -4.60 | 0.48  | mmu-miR-296-5p  |
| 1013  | 0.81 | $3.69 \times 10^{-1}$ | 0.97  | -4.60 | 0.31  | mmu-miR-16      |
| 11208 | 0.81 | $3.69 \times 10^{-1}$ | -0.97 | -4.60 | -1.19 | mmu-miR-30b     |
| 5124  | 0.81 | $3.69 \times 10^{-1}$ | -0.97 | -4.60 | -1.25 |                 |
| 18    | 0.81 | $3.69 \times 10^{-1}$ | -0.97 | -4.60 | -0.91 | mmu-miR-369-3p  |
| 3946  | 0.81 | $3.70 \times 10^{-1}$ | 0.97  | -4.60 | 0.29  | mmu-miR-423-5p  |
| 15069 | 0.81 | $3.70 \times 10^{-1}$ | 0.97  | -4.60 | 0.32  | mmu-let-7e      |
| 12956 | 0.81 | $3.70 \times 10^{-1}$ | 0.97  | -4.60 | 0.89  | mmu-miR-30e*    |
| 4616  | 0.81 | $3.70 \times 10^{-1}$ | -0.97 | -4.60 | -0.42 | mmu-miR-181a-1* |
| 35    | 0.81 | $3.71 \times 10^{-1}$ | -0.97 | -4.60 | -1.24 | mmu-miR-130b*   |
| 280   | 0.81 | $3.71 \times 10^{-1}$ | -0.97 | -4.60 | -0.36 | mmu-miR-291b-5p |
| 4386  | 0.81 | $3.71 \times 10^{-1}$ | -0.97 | -4.60 | -0.65 | mmu-miR-30e     |
| 7790  | 0.81 | $3.72 \times 10^{-1}$ | -0.97 | -4.60 | -1.19 | mmu-miR-185     |
| 13446 | 0.81 | $3.72 \times 10^{-1}$ | 0.97  | -4.60 | 0.33  | mmu-miR-106b    |
| 14469 | 0.81 | $3.73 \times 10^{-1}$ | -0.97 | -4.60 | -1.05 |                 |
| 4763  | 0.81 | $3.73 \times 10^{-1}$ | -0.97 | -4.60 | -1.22 | mmu-miR-211     |
| 4021  | 0.81 | $3.74 \times 10^{-1}$ | 0.96  | -4.60 | 0.27  | mmu-let-7b      |
| 10785 | 0.81 | $3.74 \times 10^{-1}$ | 0.96  | -4.60 | 0.88  |                 |
| 12342 | 0.81 | $3.74 \times 10^{-1}$ | 0.96  | -4.60 | 0.46  | mmu-let-7f*     |
| 2204  | 0.81 | $3.74 \times 10^{-1}$ | 0.96  | -4.60 | 0.23  | mmu-miR-342-3p  |
| 14623 | 0.81 | $3.74 \times 10^{-1}$ | 0.96  | -4.60 | 0.25  | mmu-miR-15b     |
| 15647 | 0.81 | $3.74 \times 10^{-1}$ | 0.96  | -4.60 | 1.14  | mmu-miR-105     |
| 863   | 0.81 | $3.75 \times 10^{-1}$ | 0.96  | -4.60 | 0.85  | mmu-miR-19b     |
| 2533  | 0.81 | $3.75 \times 10^{-1}$ | -0.96 | -4.60 | -0.26 | mmu-miR-140     |
| 2461  | 0.81 | $3.76 \times 10^{-1}$ | 0.96  | -4.60 | 1.02  | mmu-miR-466c-5p |
| 10509 | 0.81 | $3.76 \times 10^{-1}$ | 0.96  | -4.60 | 0.27  | mmu-miR-27a     |
| 13145 | 0.81 | $3.77 \times 10^{-1}$ | 0.96  | -4.60 | 0.38  | mmu-miR-365     |
| 9470  | 0.81 | $3.77 \times 10^{-1}$ | -0.96 | -4.60 | -0.50 | mmu-miR-465a-3p |
| 8561  | 0.81 | $3.77 \times 10^{-1}$ | 0.96  | -4.60 | 0.69  | mmu-miR-450b-5p |
| 8408  | 0.81 | $3.77 \times 10^{-1}$ | 0.96  | -4.60 | 0.47  | mmu-miR-29b     |
| 14191 | 0.81 | $3.78 \times 10^{-1}$ | -0.96 | -4.60 | -0.51 | mmu-miR-450b-3p |
| 4599  | 0.81 | $3.78 \times 10^{-1}$ | 0.96  | -4.60 | 0.26  |                 |
| 12038 | 0.81 | $3.78 \times 10^{-1}$ | 0.96  | -4.60 | 0.26  | mmu-miR-361     |
| 3732  | 0.81 | $3.78 \times 10^{-1}$ | 0.95  | -4.60 | 0.34  | mmu-miR-106b    |
| 10591 | 0.81 | $3.78 \times 10^{-1}$ | 0.95  | -4.60 | 1.32  | mmu-miR-183*    |
| 5649  | 0.81 | $3.78 \times 10^{-1}$ | 0.95  | -4.60 | 0.35  | mmu-miR-19b     |

|       |      |                       |       |       |       |                 |
|-------|------|-----------------------|-------|-------|-------|-----------------|
| 10734 | 0.82 | $3.79 \times 10^{-1}$ | 0.95  | -4.60 | 0.35  | mmu-miR-19b     |
| 3713  | 0.82 | $3.80 \times 10^{-1}$ | 0.95  | -4.60 | 0.43  | mmu-miR-872     |
| 11340 | 0.82 | $3.80 \times 10^{-1}$ | 0.95  | -4.60 | 0.23  | mmu-let-7c      |
| 7949  | 0.82 | $3.80 \times 10^{-1}$ | -0.95 | -4.60 | -1.32 | mmu-miR-340-3p  |
| 14402 | 0.82 | $3.80 \times 10^{-1}$ | 0.95  | -4.60 | 0.83  | mmu-miR-222     |
| 10817 | 0.82 | $3.80 \times 10^{-1}$ | -0.95 | -4.60 | -0.43 | mmu-miR-30c     |
| 15272 | 0.82 | $3.81 \times 10^{-1}$ | 0.95  | -4.60 | 0.93  | mmu-miR-672     |
| 10142 | 0.82 | $3.81 \times 10^{-1}$ | 0.95  | -4.60 | 0.30  | mmu-miR-532-5p  |
| 7423  | 0.82 | $3.82 \times 10^{-1}$ | 0.95  | -4.60 | 0.27  |                 |
| 4231  | 0.82 | $3.82 \times 10^{-1}$ | 0.94  | -4.60 | 0.40  | mmu-miR-34b-5p  |
| 2471  | 0.82 | $3.83 \times 10^{-1}$ | 0.94  | -4.60 | 0.37  | mmu-miR-140     |
| 458   | 0.82 | $3.83 \times 10^{-1}$ | 0.94  | -4.60 | 0.25  | mmu-let-7b      |
| 13526 | 0.82 | $3.83 \times 10^{-1}$ | 0.94  | -4.60 | 0.26  |                 |
| 3441  | 0.82 | $3.84 \times 10^{-1}$ | 0.94  | -4.60 | 0.75  | mmu-miR-702     |
| 3892  | 0.82 | $3.84 \times 10^{-1}$ | -0.94 | -4.60 | -0.47 | mmu-miR-345-5p  |
| 14005 | 0.82 | $3.85 \times 10^{-1}$ | 0.94  | -4.60 | 0.24  | mmu-miR-301a    |
| 14487 | 0.82 | $3.85 \times 10^{-1}$ | 0.94  | -4.60 | 0.32  | mmu-miR-140     |
| 12699 | 0.82 | $3.85 \times 10^{-1}$ | 0.94  | -4.60 | 0.35  | mmu-miR-30a     |
| 5118  | 0.82 | $3.85 \times 10^{-1}$ | 0.94  | -4.60 | 0.25  | mmu-let-7i      |
| 5984  | 0.82 | $3.85 \times 10^{-1}$ | 0.94  | -4.60 | 0.23  | mmu-miR-27a     |
| 9276  | 0.82 | $3.86 \times 10^{-1}$ | 0.94  | -4.60 | 0.31  |                 |
| 4660  | 0.82 | $3.86 \times 10^{-1}$ | 0.94  | -4.60 | 0.52  |                 |
| 10069 | 0.82 | $3.86 \times 10^{-1}$ | -0.94 | -4.60 | -0.85 | mmu-miR-877*    |
| 5531  | 0.82 | $3.86 \times 10^{-1}$ | 0.94  | -4.60 | 0.81  | mmu-miR-702     |
| 670   | 0.82 | $3.87 \times 10^{-1}$ | 0.94  | -4.60 | 0.62  | mmu-miR-320     |
| 5555  | 0.82 | $3.87 \times 10^{-1}$ | 0.93  | -4.60 | 0.27  | mmu-miR-26a     |
| 5477  | 0.82 | $3.88 \times 10^{-1}$ | 0.93  | -4.60 | 0.21  | mmu-miR-27a     |
| 11841 | 0.82 | $3.88 \times 10^{-1}$ | 0.93  | -4.60 | 0.40  | mmu-miR-26a     |
| 8931  | 0.82 | $3.89 \times 10^{-1}$ | -0.93 | -4.60 | -0.90 | mmu-miR-328     |
| 1659  | 0.82 | $3.89 \times 10^{-1}$ | 0.93  | -4.60 | 1.07  | mmu-miR-652     |
| 1195  | 0.82 | $3.89 \times 10^{-1}$ | 0.93  | -4.60 | 0.30  | mghv-miR-M1-2   |
| 7473  | 0.82 | $3.90 \times 10^{-1}$ | 0.93  | -4.60 | 0.51  | mmu-miR-125a-5p |
| 9739  | 0.82 | $3.91 \times 10^{-1}$ | 0.93  | -4.60 | 0.50  | mmu-miR-449a    |
| 2815  | 0.82 | $3.91 \times 10^{-1}$ | 0.93  | -4.60 | 0.28  | mmu-miR-183     |
| 13557 | 0.82 | $3.91 \times 10^{-1}$ | -0.93 | -4.60 | -0.66 | mmu-miR-30b*    |
| 4498  | 0.82 | $3.92 \times 10^{-1}$ | 0.93  | -4.60 | 0.24  |                 |
| 4264  | 0.82 | $3.92 \times 10^{-1}$ | -0.93 | -4.60 | -1.56 | mmu-miR-544     |
| 5678  | 0.82 | $3.92 \times 10^{-1}$ | -0.93 | -4.60 | -0.84 | mmu-miR-148a    |
| 8636  | 0.82 | $3.93 \times 10^{-1}$ | 0.92  | -4.60 | 0.49  | mmu-miR-503     |
| 12838 | 0.82 | $3.93 \times 10^{-1}$ | -0.92 | -4.60 | -0.59 | mmu-miR-31*     |
| 7103  | 0.82 | $3.94 \times 10^{-1}$ | 0.92  | -4.60 | 0.32  | mmu-miR-29c     |
| 12867 | 0.82 | $3.94 \times 10^{-1}$ | 0.92  | -4.60 | 0.74  | mmu-miR-210     |
| 10448 | 0.82 | $3.94 \times 10^{-1}$ | 0.92  | -4.60 | 0.48  | mmu-miR-433*    |
| 6604  | 0.82 | $3.95 \times 10^{-1}$ | -0.92 | -4.60 | -1.14 | mmu-miR-152     |
| 5002  | 0.82 | $3.95 \times 10^{-1}$ | 0.92  | -4.60 | 1.71  | mmu-miR-195     |
| 7065  | 0.82 | $3.95 \times 10^{-1}$ | 0.92  | -4.60 | 0.27  | mmu-miR-322     |

|       |      |                       |       |       |       |                 |
|-------|------|-----------------------|-------|-------|-------|-----------------|
| 11269 | 0.82 | $3.96 \times 10^{-1}$ | 0.92  | -4.60 | 0.37  | mmu-miR-19b     |
| 8487  | 0.82 | $3.96 \times 10^{-1}$ | 0.92  | -4.60 | 0.30  | mmu-miR-151-5p  |
| 3824  | 0.82 | $3.96 \times 10^{-1}$ | 0.92  | -4.60 | 0.59  | mmu-miR-483*    |
| 6718  | 0.82 | $3.96 \times 10^{-1}$ | -0.92 | -4.60 | -0.85 | mmu-miR-425*    |
| 10421 | 0.82 | $3.96 \times 10^{-1}$ | 0.92  | -4.60 | 0.24  | mmu-miR-183     |
| 1236  | 0.82 | $3.96 \times 10^{-1}$ | 0.92  | -4.60 | 0.75  | mmu-miR-30c-1*  |
| 15075 | 0.82 | $3.96 \times 10^{-1}$ | 0.92  | -4.60 | 0.25  |                 |
| 6851  | 0.82 | $3.96 \times 10^{-1}$ | 0.92  | -4.60 | 1.02  | mmu-miR-362-3p  |
| 8847  | 0.82 | $3.96 \times 10^{-1}$ | -0.92 | -4.60 | -0.88 |                 |
| 6488  | 0.82 | $3.97 \times 10^{-1}$ | 0.91  | -4.60 | 0.82  | mmu-miR-672     |
| 4479  | 0.82 | $3.97 \times 10^{-1}$ | 0.91  | -4.60 | 0.26  | mmu-let-7i      |
| 1823  | 0.82 | $3.97 \times 10^{-1}$ | 0.91  | -4.60 | 0.34  | mmu-miR-19b     |
| 7799  | 0.82 | $3.97 \times 10^{-1}$ | 0.91  | -4.60 | 0.37  | mmu-miR-365     |
| 1292  | 0.82 | $3.97 \times 10^{-1}$ | 0.91  | -4.60 | 0.28  |                 |
| 8654  | 0.82 | $3.97 \times 10^{-1}$ | -0.91 | -4.60 | -0.25 | mmu-miR-532-5p  |
| 15265 | 0.82 | $3.97 \times 10^{-1}$ | 0.91  | -4.60 | 0.21  | mmu-miR-196b    |
| 10317 | 0.82 | $3.98 \times 10^{-1}$ | 0.91  | -4.60 | 0.24  |                 |
| 1517  | 0.82 | $3.98 \times 10^{-1}$ | 0.91  | -4.60 | 0.20  |                 |
| 14394 | 0.82 | $3.99 \times 10^{-1}$ | 0.91  | -4.60 | 0.52  | mmu-miR-181b    |
| 8397  | 0.82 | $3.99 \times 10^{-1}$ | -0.91 | -4.60 | -0.21 | mmu-miR-324-5p  |
| 13937 | 0.82 | $3.99 \times 10^{-1}$ | 0.91  | -4.60 | 0.47  | mmu-miR-125a-5p |
| 3230  | 0.82 | $4.00 \times 10^{-1}$ | 0.91  | -4.60 | 0.28  | mmu-miR-22      |
| 5296  | 0.82 | $4.01 \times 10^{-1}$ | 0.91  | -4.60 | 0.32  | mmu-miR-140     |
| 2263  | 0.82 | $4.01 \times 10^{-1}$ | 0.91  | -4.60 | 0.62  | mmu-miR-20b     |
| 5933  | 0.82 | $4.02 \times 10^{-1}$ | 0.90  | -4.60 | 0.29  | mmu-miR-290-3p  |
| 2372  | 0.82 | $4.02 \times 10^{-1}$ | 0.90  | -4.60 | 0.30  |                 |
| 4496  | 0.82 | $4.03 \times 10^{-1}$ | 0.90  | -4.60 | 0.67  | mmu-miR-27b     |
| 1464  | 0.82 | $4.03 \times 10^{-1}$ | 0.90  | -4.60 | 2.00  | mmu-miR-148a    |
| 14534 | 0.82 | $4.03 \times 10^{-1}$ | 0.90  | -4.60 | 0.38  | mmu-miR-30b*    |
| 3080  | 0.82 | $4.03 \times 10^{-1}$ | 0.90  | -4.60 | 0.26  | mmu-miR-15b     |
| 13898 | 0.82 | $4.04 \times 10^{-1}$ | 0.90  | -4.60 | 0.27  | mmu-let-7e      |
| 5088  | 0.82 | $4.04 \times 10^{-1}$ | 0.90  | -4.60 | 0.24  | mmu-let-7b      |
| 5014  | 0.82 | $4.04 \times 10^{-1}$ | 0.90  | -4.60 | 0.24  | mmu-let-7b      |
| 12510 | 0.82 | $4.05 \times 10^{-1}$ | 0.90  | -4.60 | 0.41  | mmu-miR-29b*    |
| 7263  | 0.82 | $4.05 \times 10^{-1}$ | 0.90  | -4.60 | 0.24  | mmu-miR-151-5p  |
| 10776 | 0.82 | $4.05 \times 10^{-1}$ | 0.90  | -4.60 | 0.27  |                 |
| 10845 | 0.82 | $4.05 \times 10^{-1}$ | 0.90  | -4.60 | 0.45  | mmu-miR-17*     |
| 15294 | 0.82 | $4.06 \times 10^{-1}$ | 0.90  | -4.60 | 0.49  | mmu-miR-29c     |
| 9663  | 0.82 | $4.06 \times 10^{-1}$ | 0.89  | -4.60 | 0.26  | mmu-miR-23a     |
| 6360  | 0.82 | $4.07 \times 10^{-1}$ | 0.89  | -4.60 | 0.44  | mmu-miR-30c-2*  |
| 5514  | 0.82 | $4.07 \times 10^{-1}$ | 0.89  | -4.60 | 1.06  | mmu-miR-186     |
| 6905  | 0.82 | $4.08 \times 10^{-1}$ | 0.89  | -4.60 | 0.70  | mmu-miR-669n    |
| 14738 | 0.82 | $4.08 \times 10^{-1}$ | 0.89  | -4.60 | 0.30  | mmu-miR-183     |
| 14894 | 0.82 | $4.08 \times 10^{-1}$ | 0.89  | -4.60 | 0.26  | mmu-miR-16      |
| 15688 | 0.82 | $4.09 \times 10^{-1}$ | -0.89 | -4.60 | -0.37 | mmu-miR-30e*    |
| 1554  | 0.82 | $4.09 \times 10^{-1}$ | -0.89 | -4.60 | -0.36 | mmu-miR-149     |

|       |      |                       |       |       |       |                 |
|-------|------|-----------------------|-------|-------|-------|-----------------|
| 8896  | 0.82 | $4.09 \times 10^{-1}$ | -0.89 | -4.60 | -0.23 | mmu-miR-324-5p  |
| 13180 | 0.82 | $4.09 \times 10^{-1}$ | 0.89  | -4.60 | 0.32  | mmu-miR-106b    |
| 2325  | 0.82 | $4.10 \times 10^{-1}$ | -0.89 | -4.60 | -1.48 | mmu-miR-542-3p  |
| 12835 | 0.82 | $4.10 \times 10^{-1}$ | 0.89  | -4.60 | 0.27  |                 |
| 9047  | 0.82 | $4.12 \times 10^{-1}$ | 0.88  | -4.60 | 0.23  | mmu-let-7i      |
| 560   | 0.82 | $4.13 \times 10^{-1}$ | -0.88 | -4.60 | -0.74 | mmu-miR-195     |
| 10344 | 0.82 | $4.13 \times 10^{-1}$ | 0.88  | -4.60 | 0.27  | mmu-miR-331-3p  |
| 2614  | 0.82 | $4.13 \times 10^{-1}$ | 0.88  | -4.60 | 3.04  | mmu-miR-192     |
| 7237  | 0.82 | $4.13 \times 10^{-1}$ | 0.88  | -4.60 | 0.23  |                 |
| 13153 | 0.82 | $4.13 \times 10^{-1}$ | 0.88  | -4.60 | 0.35  | mmu-miR-128     |
| 1805  | 0.82 | $4.13 \times 10^{-1}$ | 0.88  | -4.60 | 1.09  | mmu-miR-17*     |
| 3204  | 0.82 | $4.14 \times 10^{-1}$ | 0.88  | -4.60 | 0.22  | mmu-miR-16      |
| 7905  | 0.82 | $4.14 \times 10^{-1}$ | 0.88  | -4.60 | 0.24  | mmu-miR-107     |
| 754   | 0.82 | $4.14 \times 10^{-1}$ | 0.88  | -4.60 | 0.36  | mmu-miR-106b    |
| 5214  | 0.82 | $4.14 \times 10^{-1}$ | 0.88  | -4.60 | 0.22  | mmu-miR-322     |
| 14040 | 0.82 | $4.14 \times 10^{-1}$ | 0.88  | -4.60 | 0.24  | mmu-miR-103     |
| 13679 | 0.82 | $4.15 \times 10^{-1}$ | -0.88 | -4.60 | -0.30 | mmu-miR-30e     |
| 7575  | 0.82 | $4.15 \times 10^{-1}$ | 0.88  | -4.60 | 0.24  | mmu-miR-15b     |
| 11554 | 0.82 | $4.15 \times 10^{-1}$ | 0.88  | -4.60 | 0.28  | mmu-miR-28      |
| 6257  | 0.82 | $4.16 \times 10^{-1}$ | 0.88  | -4.60 | 0.41  | mmu-miR-18a     |
| 9733  | 0.82 | $4.16 \times 10^{-1}$ | 0.88  | -4.60 | 0.25  | mmu-let-7i      |
| 2664  | 0.82 | $4.16 \times 10^{-1}$ | 0.88  | -4.60 | 1.06  | mmu-miR-466a-5p |
| 2447  | 0.83 | $4.16 \times 10^{-1}$ | -0.87 | -4.60 | -0.19 | mmu-miR-23b     |
| 6407  | 0.83 | $4.17 \times 10^{-1}$ | 0.87  | -4.60 | 0.35  | mmu-miR-103     |
| 460   | 0.83 | $4.17 \times 10^{-1}$ | -0.87 | -4.60 | -0.35 | mmu-miR-23b     |
| 12834 | 0.83 | $4.17 \times 10^{-1}$ | 0.87  | -4.60 | 0.68  | mmu-miR-671-3p  |
| 213   | 0.83 | $4.18 \times 10^{-1}$ | 0.87  | -4.60 | 1.30  | mmu-miR-1187    |
| 7451  | 0.83 | $4.19 \times 10^{-1}$ | 0.87  | -4.60 | 0.45  | mmu-miR-497     |
| 5294  | 0.83 | $4.19 \times 10^{-1}$ | 0.87  | -4.60 | 0.50  | mmu-miR-128     |
| 12846 | 0.83 | $4.19 \times 10^{-1}$ | 0.87  | -4.60 | 0.91  | mmu-miR-29b     |
| 5633  | 0.83 | $4.20 \times 10^{-1}$ | -0.87 | -4.60 | -0.23 | mmu-miR-130a    |
| 15057 | 0.83 | $4.20 \times 10^{-1}$ | -0.87 | -4.60 | -0.47 | mmu-miR-30b     |
| 4101  | 0.83 | $4.20 \times 10^{-1}$ | 0.87  | -4.60 | 1.30  | mmu-miR-679     |
| 9808  | 0.83 | $4.20 \times 10^{-1}$ | 0.87  | -4.60 | 0.27  | mmu-miR-16      |
| 5043  | 0.83 | $4.21 \times 10^{-1}$ | -0.87 | -4.60 | -0.30 | mmu-miR-741     |
| 1187  | 0.83 | $4.21 \times 10^{-1}$ | 0.87  | -4.60 | 0.25  | mmu-let-7e      |
| 10842 | 0.83 | $4.22 \times 10^{-1}$ | 0.86  | -4.60 | 0.43  | mmu-miR-672     |
| 13100 | 0.83 | $4.22 \times 10^{-1}$ | 0.86  | -4.60 | 0.22  | mmu-miR-24      |
| 4872  | 0.83 | $4.23 \times 10^{-1}$ | 0.86  | -4.60 | 0.30  |                 |
| 6935  | 0.83 | $4.24 \times 10^{-1}$ | 0.86  | -4.60 | 0.84  | mmu-miR-715     |
| 882   | 0.83 | $4.24 \times 10^{-1}$ | 0.86  | -4.60 | 0.27  | mmu-miR-16      |
| 1751  | 0.83 | $4.24 \times 10^{-1}$ | 0.86  | -4.60 | 0.48  | mmu-miR-324-3p  |
| 14244 | 0.83 | $4.25 \times 10^{-1}$ | 0.86  | -4.60 | 0.26  | mmu-miR-31*     |
| 9807  | 0.83 | $4.26 \times 10^{-1}$ | -0.86 | -4.60 | -0.20 | mmu-miR-130a    |
| 8890  | 0.83 | $4.26 \times 10^{-1}$ | 0.86  | -4.60 | 0.27  | mmu-miR-183     |
| 8573  | 0.83 | $4.26 \times 10^{-1}$ | -0.86 | -4.60 | -0.43 | mmu-miR-191*    |

|       |      |                       |       |       |       |                 |
|-------|------|-----------------------|-------|-------|-------|-----------------|
| 2320  | 0.83 | $4.27 \times 10^{-1}$ | 0.85  | -4.60 | 0.47  | mmu-miR-221     |
| 4262  | 0.83 | $4.27 \times 10^{-1}$ | 0.85  | -4.60 | 0.31  | mmu-miR-19b     |
| 2911  | 0.83 | $4.27 \times 10^{-1}$ | -0.85 | -4.60 | -0.57 | mmu-miR-92b     |
| 9710  | 0.83 | $4.28 \times 10^{-1}$ | 0.85  | -4.60 | 0.23  | mmu-miR-16      |
| 8220  | 0.83 | $4.28 \times 10^{-1}$ | -0.85 | -4.60 | -0.34 | mmu-miR-30a     |
| 13810 | 0.83 | $4.29 \times 10^{-1}$ | -0.85 | -4.60 | -0.32 | mmu-miR-23b     |
| 13770 | 0.83 | $4.29 \times 10^{-1}$ | -0.85 | -4.60 | -0.29 | mmu-miR-30a     |
| 1014  | 0.83 | $4.29 \times 10^{-1}$ | 0.85  | -4.60 | 0.28  | mmu-miR-28      |
| 6703  | 0.83 | $4.29 \times 10^{-1}$ | -0.85 | -4.60 | -0.90 | mmu-miR-193b    |
| 1331  | 0.83 | $4.29 \times 10^{-1}$ | 0.85  | -4.60 | 0.49  | mmu-miR-155     |
| 5126  | 0.83 | $4.29 \times 10^{-1}$ | 0.85  | -4.60 | 0.47  | mmu-miR-146a    |
| 13175 | 0.83 | $4.30 \times 10^{-1}$ | -0.85 | -4.60 | -0.61 | mmu-miR-335-3p  |
| 3222  | 0.83 | $4.30 \times 10^{-1}$ | 0.85  | -4.60 | 1.13  | mmu-miR-342-5p  |
| 9790  | 0.83 | $4.30 \times 10^{-1}$ | 0.85  | -4.60 | 0.86  | mmu-miR-298     |
| 3280  | 0.83 | $4.30 \times 10^{-1}$ | -0.85 | -4.60 | -0.35 | mmu-miR-463     |
| 2288  | 0.83 | $4.30 \times 10^{-1}$ | 0.85  | -4.60 | 0.25  | mmu-let-7b      |
| 15120 | 0.83 | $4.30 \times 10^{-1}$ | -0.85 | -4.60 | -0.61 | mmu-miR-302b    |
| 9415  | 0.83 | $4.31 \times 10^{-1}$ | 0.85  | -4.60 | 0.29  | mmu-miR-103     |
| 1008  | 0.83 | $4.31 \times 10^{-1}$ | 0.85  | -4.60 | 0.29  |                 |
| 11146 | 0.83 | $4.31 \times 10^{-1}$ | -0.85 | -4.60 | -0.48 | mmu-miR-465a-3p |
| 39    | 0.83 | $4.31 \times 10^{-1}$ | 0.85  | -4.60 | 0.19  | mmu-miR-322     |
| 14147 | 0.83 | $4.31 \times 10^{-1}$ | 0.85  | -4.60 | 0.31  | mmu-miR-196a    |
| 14513 | 0.83 | $4.32 \times 10^{-1}$ | -0.85 | -4.60 | -1.03 | mmu-miR-378     |
| 15571 | 0.83 | $4.32 \times 10^{-1}$ | 0.84  | -4.60 | 0.50  | mmu-miR-92a*    |
| 5138  | 0.83 | $4.32 \times 10^{-1}$ | -0.84 | -4.60 | -1.28 | mmu-miR-450a-5p |
| 11892 | 0.83 | $4.33 \times 10^{-1}$ | 0.84  | -4.60 | 0.47  | mmu-miR-380-3p  |
| 160   | 0.83 | $4.33 \times 10^{-1}$ | -0.84 | -4.60 | -0.76 | mmu-miR-181a-2* |
| 1268  | 0.83 | $4.33 \times 10^{-1}$ | 0.84  | -4.60 | 0.24  | mmu-let-7c      |
| 2529  | 0.83 | $4.33 \times 10^{-1}$ | 0.84  | -4.60 | 0.21  | mmu-miR-16      |
| 8644  | 0.83 | $4.34 \times 10^{-1}$ | -0.84 | -4.60 | -0.37 | mmu-miR-290-3p  |
| 1077  | 0.83 | $4.34 \times 10^{-1}$ | 0.84  | -4.60 | 0.35  | mmu-miR-28      |
| 9560  | 0.83 | $4.35 \times 10^{-1}$ | 0.84  | -4.60 | 0.23  | mmu-miR-183     |
| 8863  | 0.83 | $4.35 \times 10^{-1}$ | -0.84 | -4.60 | -0.99 | mmu-miR-448     |
| 12634 | 0.83 | $4.35 \times 10^{-1}$ | 0.84  | -4.60 | 0.22  |                 |
| 13048 | 0.83 | $4.36 \times 10^{-1}$ | 0.84  | -4.60 | 0.20  | mmu-miR-10a     |
| 13981 | 0.83 | $4.36 \times 10^{-1}$ | 0.84  | -4.60 | 0.27  | mmu-miR-30d     |
| 10311 | 0.83 | $4.36 \times 10^{-1}$ | 0.84  | -4.60 | 0.40  | mmu-miR-1906    |
| 3439  | 0.83 | $4.38 \times 10^{-1}$ | 0.83  | -4.60 | 0.58  | mmu-miR-140*    |
| 1378  | 0.83 | $4.38 \times 10^{-1}$ | 0.83  | -4.60 | 0.69  | mmu-miR-152     |
| 11961 | 0.83 | $4.39 \times 10^{-1}$ | -0.83 | -4.60 | -0.60 | mmu-miR-30c-2*  |
| 12814 | 0.83 | $4.39 \times 10^{-1}$ | 0.83  | -4.60 | 0.23  |                 |
| 13034 | 0.83 | $4.39 \times 10^{-1}$ | -0.83 | -4.60 | -0.31 | mmu-miR-26b     |
| 3806  | 0.83 | $4.39 \times 10^{-1}$ | 0.83  | -4.60 | 0.50  |                 |
| 9066  | 0.83 | $4.40 \times 10^{-1}$ | -0.83 | -4.60 | -1.23 | mmu-miR-871     |
| 10222 | 0.84 | $4.41 \times 10^{-1}$ | -0.83 | -4.60 | -0.51 | mmu-miR-191*    |
| 4837  | 0.84 | $4.42 \times 10^{-1}$ | -0.83 | -4.60 | -0.39 | mmu-miR-185     |

|       |      |                       |       |       |       |                 |
|-------|------|-----------------------|-------|-------|-------|-----------------|
| 12209 | 0.84 | 4.42x10 <sup>-1</sup> | -0.82 | -4.61 | -0.26 | mmu-let-7d      |
| 12618 | 0.84 | 4.42x10 <sup>-1</sup> | 0.82  | -4.61 | 1.07  | mmu-miR-298     |
| 10775 | 0.84 | 4.42x10 <sup>-1</sup> | -0.82 | -4.61 | -1.50 | mmu-miR-33      |
| 11727 | 0.84 | 4.43x10 <sup>-1</sup> | 0.82  | -4.61 | 0.85  | mmu-miR-466l    |
| 8590  | 0.84 | 4.44x10 <sup>-1</sup> | -0.82 | -4.61 | -0.56 | mmu-miR-345-5p  |
| 12612 | 0.84 | 4.45x10 <sup>-1</sup> | 0.82  | -4.61 | 0.51  | mmu-miR-365     |
| 6279  | 0.84 | 4.45x10 <sup>-1</sup> | 0.82  | -4.61 | 0.79  | mmu-miR-30c-1*  |
| 13905 | 0.84 | 4.45x10 <sup>-1</sup> | 0.82  | -4.61 | 0.46  | mmu-miR-193b    |
| 4948  | 0.84 | 4.45x10 <sup>-1</sup> | 0.82  | -4.61 | 0.28  |                 |
| 6504  | 0.84 | 4.46x10 <sup>-1</sup> | -0.82 | -4.61 | -0.39 | mmu-miR-301a    |
| 2400  | 0.84 | 4.46x10 <sup>-1</sup> | 0.82  | -4.61 | 0.23  | mmu-let-7b      |
| 7494  | 0.84 | 4.47x10 <sup>-1</sup> | 0.81  | -4.61 | 1.57  | mmu-miR-484     |
| 10770 | 0.84 | 4.48x10 <sup>-1</sup> | 0.81  | -4.61 | 0.68  | mmu-miR-29b     |
| 7653  | 0.84 | 4.48x10 <sup>-1</sup> | 0.81  | -4.61 | 0.28  |                 |
| 3750  | 0.84 | 4.48x10 <sup>-1</sup> | -0.81 | -4.61 | -0.45 | mmu-miR-301a    |
| 5895  | 0.84 | 4.48x10 <sup>-1</sup> | 0.81  | -4.61 | 0.29  | mmu-miR-106b    |
| 4239  | 0.84 | 4.48x10 <sup>-1</sup> | 0.81  | -4.61 | 0.55  | mmu-miR-223     |
| 14734 | 0.84 | 4.49x10 <sup>-1</sup> | -0.81 | -4.61 | -1.15 | mmu-miR-191*    |
| 14999 | 0.84 | 4.49x10 <sup>-1</sup> | 0.81  | -4.61 | 0.22  |                 |
| 10691 | 0.84 | 4.50x10 <sup>-1</sup> | 0.81  | -4.61 | 0.44  | mmu-miR-423-5p  |
| 12012 | 0.84 | 4.50x10 <sup>-1</sup> | -0.81 | -4.61 | -0.26 | mmu-miR-345-5p  |
| 5692  | 0.84 | 4.50x10 <sup>-1</sup> | 0.81  | -4.61 | 0.23  | mmu-miR-15b     |
| 14389 | 0.84 | 4.50x10 <sup>-1</sup> | 0.81  | -4.61 | 0.27  | mmu-miR-185     |
| 10379 | 0.84 | 4.51x10 <sup>-1</sup> | -0.81 | -4.61 | -0.27 | mmu-miR-425*    |
| 10682 | 0.84 | 4.51x10 <sup>-1</sup> | -0.81 | -4.61 | -0.69 |                 |
| 14307 | 0.84 | 4.51x10 <sup>-1</sup> | -0.81 | -4.61 | -2.02 | mmu-miR-697     |
| 15631 | 0.84 | 4.52x10 <sup>-1</sup> | -0.81 | -4.61 | -0.53 | mmu-miR-10b     |
| 10768 | 0.84 | 4.52x10 <sup>-1</sup> | 0.81  | -4.61 | 0.24  | mmu-miR-16      |
| 2672  | 0.84 | 4.53x10 <sup>-1</sup> | 0.80  | -4.61 | 0.22  | mmu-let-7b      |
| 10248 | 0.84 | 4.53x10 <sup>-1</sup> | -0.80 | -4.61 | -0.23 | mmu-let-7g      |
| 3465  | 0.84 | 4.54x10 <sup>-1</sup> | 0.80  | -4.61 | 0.42  | mmu-miR-140     |
| 791   | 0.84 | 4.55x10 <sup>-1</sup> | 0.80  | -4.61 | 0.33  | mmu-miR-532-5p  |
| 1112  | 0.84 | 4.55x10 <sup>-1</sup> | 0.80  | -4.61 | 0.27  | mmu-miR-210     |
| 4969  | 0.84 | 4.56x10 <sup>-1</sup> | 0.80  | -4.61 | 0.20  | mmu-miR-27a     |
| 10271 | 0.84 | 4.56x10 <sup>-1</sup> | -0.80 | -4.61 | -0.26 | mmu-miR-148a    |
| 14245 | 0.84 | 4.56x10 <sup>-1</sup> | 0.80  | -4.61 | 0.91  | mmu-miR-92b     |
| 2977  | 0.84 | 4.56x10 <sup>-1</sup> | 0.80  | -4.61 | 0.24  | mmu-miR-125a-5p |
| 2883  | 0.84 | 4.56x10 <sup>-1</sup> | -0.80 | -4.61 | -0.79 | mmu-miR-30b     |
| 1732  | 0.84 | 4.57x10 <sup>-1</sup> | 0.80  | -4.61 | 0.22  | mmu-let-7b      |
| 9194  | 0.84 | 4.57x10 <sup>-1</sup> | -0.80 | -4.61 | -0.23 | mghv-miR-M1-2   |
| 6113  | 0.84 | 4.57x10 <sup>-1</sup> | 0.80  | -4.61 | 0.49  | mmu-miR-140     |
| 12366 | 0.84 | 4.57x10 <sup>-1</sup> | 0.80  | -4.61 | 0.66  |                 |
| 12068 | 0.84 | 4.58x10 <sup>-1</sup> | 0.80  | -4.61 | 0.22  |                 |
| 5488  | 0.84 | 4.58x10 <sup>-1</sup> | 0.79  | -4.61 | 0.83  | mmu-miR-425*    |
| 5799  | 0.84 | 4.59x10 <sup>-1</sup> | -0.79 | -4.61 | -0.20 | mmu-miR-130a    |
| 11377 | 0.84 | 4.59x10 <sup>-1</sup> | -0.79 | -4.61 | -0.62 | mmu-miR-298     |



|       |      |                       |       |       |       |                 |
|-------|------|-----------------------|-------|-------|-------|-----------------|
| 6102  | 0.84 | $4.59 \times 10^{-1}$ | 0.79  | -4.61 | 0.22  | mmu-miR-96      |
| 13182 | 0.84 | $4.59 \times 10^{-1}$ | 0.79  | -4.61 | 0.51  | mmu-miR-335-3p  |
| 9401  | 0.84 | $4.59 \times 10^{-1}$ | -0.79 | -4.61 | -0.79 | mmu-miR-191*    |
| 360   | 0.84 | $4.60 \times 10^{-1}$ | 0.79  | -4.61 | 0.22  | mmu-let-7e      |
| 1311  | 0.84 | $4.60 \times 10^{-1}$ | 0.79  | -4.61 | 0.20  |                 |
| 3640  | 0.84 | $4.60 \times 10^{-1}$ | 0.79  | -4.61 | 0.34  | mmu-miR-130b    |
| 4769  | 0.84 | $4.60 \times 10^{-1}$ | 0.79  | -4.61 | 0.25  | mmu-miR-22      |
| 6270  | 0.84 | $4.60 \times 10^{-1}$ | 0.79  | -4.61 | 0.18  | mmu-miR-196b    |
| 11635 | 0.84 | $4.60 \times 10^{-1}$ | 0.79  | -4.61 | 0.28  | mmu-miR-151-5p  |
| 9631  | 0.84 | $4.60 \times 10^{-1}$ | 0.79  | -4.61 | 0.22  | mmu-miR-301a    |
| 36    | 0.84 | $4.61 \times 10^{-1}$ | 0.79  | -4.61 | 0.21  | mmu-miR-16      |
| 2355  | 0.84 | $4.61 \times 10^{-1}$ | 0.79  | -4.61 | 0.30  | mmu-miR-19b     |
| 2488  | 0.84 | $4.61 \times 10^{-1}$ | -0.79 | -4.61 | -0.32 | mmu-let-7f*     |
| 14314 | 0.84 | $4.62 \times 10^{-1}$ | 0.79  | -4.61 | 0.33  | mghv-miR-M1-2   |
| 14931 | 0.84 | $4.63 \times 10^{-1}$ | 0.79  | -4.61 | 0.23  | mmu-miR-183     |
| 13984 | 0.84 | $4.64 \times 10^{-1}$ | -0.78 | -4.61 | -0.70 | mmu-miR-497     |
| 2418  | 0.84 | $4.65 \times 10^{-1}$ | -0.78 | -4.61 | -0.41 | mmu-miR-27b     |
| 5283  | 0.84 | $4.65 \times 10^{-1}$ | 0.78  | -4.61 | 0.30  | mmu-miR-19b     |
| 13278 | 0.84 | $4.65 \times 10^{-1}$ | -0.78 | -4.61 | -0.70 | mmu-miR-30c     |
| 11016 | 0.84 | $4.65 \times 10^{-1}$ | -0.78 | -4.61 | -0.49 | mmu-miR-221     |
| 7389  | 0.84 | $4.66 \times 10^{-1}$ | 0.78  | -4.61 | 0.21  |                 |
| 15060 | 0.84 | $4.66 \times 10^{-1}$ | 0.78  | -4.61 | 0.28  | mmu-miR-106b    |
| 4942  | 0.84 | $4.66 \times 10^{-1}$ | -0.78 | -4.61 | -0.60 | mmu-miR-362-3p  |
| 144   | 0.84 | $4.66 \times 10^{-1}$ | -0.78 | -4.61 | -0.27 | mmu-miR-27b     |
| 6576  | 0.84 | $4.67 \times 10^{-1}$ | 0.78  | -4.61 | 0.25  | mmu-miR-10a     |
| 3517  | 0.84 | $4.67 \times 10^{-1}$ | 0.78  | -4.61 | 0.24  | mmu-let-7e      |
| 14552 | 0.84 | $4.67 \times 10^{-1}$ | 0.78  | -4.61 | 0.32  | mmu-miR-155     |
| 3120  | 0.84 | $4.67 \times 10^{-1}$ | 0.78  | -4.61 | 0.42  | mmu-miR-500     |
| 14548 | 0.84 | $4.67 \times 10^{-1}$ | -0.78 | -4.61 | -1.41 | mmu-miR-21*     |
| 5378  | 0.84 | $4.68 \times 10^{-1}$ | -0.78 | -4.61 | -0.60 | mmu-let-7b*     |
| 11500 | 0.84 | $4.68 \times 10^{-1}$ | 0.78  | -4.61 | 0.27  | mmu-miR-27a     |
| 12951 | 0.84 | $4.68 \times 10^{-1}$ | -0.78 | -4.61 | -0.31 | mmu-miR-532-5p  |
| 6884  | 0.84 | $4.69 \times 10^{-1}$ | 0.77  | -4.61 | 0.40  | mmu-miR-92b     |
| 6361  | 0.84 | $4.70 \times 10^{-1}$ | -0.77 | -4.61 | -0.48 | mmu-miR-511     |
| 15404 | 0.84 | $4.70 \times 10^{-1}$ | -0.77 | -4.61 | -0.30 | mmu-miR-135a    |
| 9274  | 0.84 | $4.70 \times 10^{-1}$ | 0.77  | -4.61 | 0.31  | mmu-miR-27a     |
| 14267 | 0.84 | $4.70 \times 10^{-1}$ | -0.77 | -4.61 | -0.21 | mmu-miR-130b    |
| 15690 | 0.84 | $4.70 \times 10^{-1}$ | -0.77 | -4.61 | -0.22 | mmu-let-7f      |
| 3377  | 0.84 | $4.70 \times 10^{-1}$ | 0.77  | -4.61 | 0.26  | mmu-miR-149     |
| 6657  | 0.84 | $4.71 \times 10^{-1}$ | 0.77  | -4.61 | 0.33  | mmu-miR-7a      |
| 12793 | 0.84 | $4.71 \times 10^{-1}$ | 0.77  | -4.61 | 0.18  | mmu-miR-361     |
| 701   | 0.84 | $4.71 \times 10^{-1}$ | 0.77  | -4.61 | 0.24  | mmu-miR-296-5p  |
| 13918 | 0.84 | $4.72 \times 10^{-1}$ | 0.77  | -4.61 | 0.23  | mmu-miR-361     |
| 4100  | 0.84 | $4.72 \times 10^{-1}$ | -0.77 | -4.61 | -1.07 | mmu-miR-465a-3p |
| 4215  | 0.84 | $4.72 \times 10^{-1}$ | 0.77  | -4.61 | 0.30  | mmu-miR-31*     |
| 14473 | 0.84 | $4.74 \times 10^{-1}$ | 0.77  | -4.61 | 0.19  | mmu-miR-24      |

|       |      |                       |       |       |       |                   |
|-------|------|-----------------------|-------|-------|-------|-------------------|
| 3453  | 0.85 | $4.75 \times 10^{-1}$ | -0.76 | -4.61 | -0.21 | mmu-let-7d        |
| 15340 | 0.85 | $4.75 \times 10^{-1}$ | 0.76  | -4.61 | 0.29  |                   |
| 14617 | 0.85 | $4.76 \times 10^{-1}$ | -0.76 | -4.61 | -0.41 | mmu-miR-497       |
| 4086  | 0.85 | $4.76 \times 10^{-1}$ | 0.76  | -4.61 | 0.20  | mmu-miR-331-3p    |
| 8136  | 0.85 | $4.76 \times 10^{-1}$ | 0.76  | -4.61 | 0.46  |                   |
| 12630 | 0.85 | $4.76 \times 10^{-1}$ | 0.76  | -4.61 | 0.21  | mmu-let-7b        |
| 5237  | 0.85 | $4.76 \times 10^{-1}$ | 0.76  | -4.61 | 0.34  | mmu-miR-361       |
| 319   | 0.85 | $4.77 \times 10^{-1}$ | 0.76  | -4.61 | 0.71  | mmu-miR-743b-3p   |
| 3116  | 0.85 | $4.77 \times 10^{-1}$ | -0.76 | -4.61 | -0.61 | mmu-miR-301a      |
| 1764  | 0.85 | $4.78 \times 10^{-1}$ | 0.76  | -4.61 | 0.30  | mmu-miR-7a        |
| 6961  | 0.85 | $4.78 \times 10^{-1}$ | 0.76  | -4.61 | 0.17  | mmu-miR-27a       |
| 8339  | 0.85 | $4.78 \times 10^{-1}$ | 0.76  | -4.61 | 0.29  | mmu-miR-19b       |
| 3725  | 0.85 | $4.79 \times 10^{-1}$ | 0.76  | -4.61 | 0.21  |                   |
| 1393  | 0.85 | $4.79 \times 10^{-1}$ | 0.76  | -4.61 | 0.18  |                   |
| 3585  | 0.85 | $4.80 \times 10^{-1}$ | -0.75 | -4.61 | -0.44 | mg hv-miR-M1-4    |
| 15612 | 0.85 | $4.81 \times 10^{-1}$ | -0.75 | -4.61 | -0.27 | mmu-miR-28        |
| 8075  | 0.85 | $4.81 \times 10^{-1}$ | -0.75 | -4.61 | -0.30 | mmu-miR-365       |
| 6727  | 0.85 | $4.81 \times 10^{-1}$ | 0.75  | -4.61 | 0.60  | mmu-miR-467e      |
| 8553  | 0.85 | $4.81 \times 10^{-1}$ | 0.75  | -4.61 | 0.20  |                   |
| 14240 | 0.85 | $4.81 \times 10^{-1}$ | 0.75  | -4.61 | 0.24  | mmu-let-7e        |
| 7     | 0.85 | $4.83 \times 10^{-1}$ | -0.75 | -4.61 | -0.20 | mmu-let-7f        |
| 9996  | 0.85 | $4.83 \times 10^{-1}$ | -0.75 | -4.61 | -1.20 |                   |
| 1351  | 0.85 | $4.83 \times 10^{-1}$ | -0.75 | -4.61 | -0.32 |                   |
| 8528  | 0.85 | $4.83 \times 10^{-1}$ | 0.75  | -4.61 | 0.23  | mmu-miR-322       |
| 3949  | 0.85 | $4.84 \times 10^{-1}$ | 0.75  | -4.61 | 0.22  | mmu-miR-27a       |
| 4847  | 0.85 | $4.84 \times 10^{-1}$ | 0.75  | -4.61 | 0.19  | mmu-miR-361       |
| 3905  | 0.85 | $4.85 \times 10^{-1}$ | 0.75  | -4.61 | 0.24  | mmu-miR-106b      |
| 511   | 0.85 | $4.86 \times 10^{-1}$ | 0.74  | -4.61 | 0.71  |                   |
| 2375  | 0.85 | $4.86 \times 10^{-1}$ | 0.74  | -4.61 | 0.55  | mmu-miR-466c-5p   |
| 5980  | 0.85 | $4.86 \times 10^{-1}$ | -0.74 | -4.61 | -0.22 | mmu-let-7d        |
| 1978  | 0.85 | $4.86 \times 10^{-1}$ | 0.74  | -4.61 | 0.41  | mmu-miR-149       |
| 7029  | 0.85 | $4.86 \times 10^{-1}$ | 0.74  | -4.61 | 0.21  |                   |
| 10319 | 0.85 | $4.86 \times 10^{-1}$ | 0.74  | -4.61 | 0.21  | mmu-let-7b        |
| 6014  | 0.85 | $4.86 \times 10^{-1}$ | 0.74  | -4.61 | 0.79  | mcmv-miR-M23-1-5p |
| 3583  | 0.85 | $4.86 \times 10^{-1}$ | 0.74  | -4.61 | 0.49  | mmu-miR-7b        |
| 10884 | 0.85 | $4.86 \times 10^{-1}$ | 0.74  | -4.61 | 0.21  | mmu-miR-423-5p    |
| 2061  | 0.85 | $4.87 \times 10^{-1}$ | 0.74  | -4.61 | 0.21  | mmu-let-7b        |
| 4433  | 0.85 | $4.87 \times 10^{-1}$ | 0.74  | -4.61 | 0.26  | mmu-miR-465a-3p   |
| 11724 | 0.85 | $4.87 \times 10^{-1}$ | -0.74 | -4.61 | -0.22 | mmu-miR-23b       |
| 1776  | 0.85 | $4.88 \times 10^{-1}$ | 0.74  | -4.61 | 0.19  | mmu-miR-24        |
| 15246 | 0.85 | $4.88 \times 10^{-1}$ | -0.74 | -4.61 | -0.18 | mmu-miR-221       |
| 9241  | 0.85 | $4.88 \times 10^{-1}$ | 0.74  | -4.61 | 0.22  | mmu-miR-151-5p    |
| 4946  | 0.85 | $4.88 \times 10^{-1}$ | -0.74 | -4.61 | -0.34 | mmu-miR-669a      |
| 13191 | 0.85 | $4.88 \times 10^{-1}$ | -0.74 | -4.61 | -0.21 | mmu-miR-130a      |
| 5912  | 0.85 | $4.88 \times 10^{-1}$ | 0.74  | -4.61 | 0.42  |                   |
| 3455  | 0.85 | $4.88 \times 10^{-1}$ | 0.74  | -4.61 | 0.67  | mmu-miR-28        |

|       |      |                       |       |       |       |                 |
|-------|------|-----------------------|-------|-------|-------|-----------------|
| 12864 | 0.85 | 4.89x10 <sup>-1</sup> | -0.74 | -4.61 | -0.23 | mmu-miR-30a     |
| 2211  | 0.85 | 4.90x10 <sup>-1</sup> | 0.74  | -4.61 | 0.40  | mmu-miR-877*    |
| 13121 | 0.85 | 4.90x10 <sup>-1</sup> | 0.74  | -4.61 | 0.26  |                 |
| 12554 | 0.85 | 4.90x10 <sup>-1</sup> | 0.74  | -4.61 | 0.28  |                 |
| 5603  | 0.85 | 4.90x10 <sup>-1</sup> | -0.74 | -4.61 | -0.34 | mmu-let-7a*     |
| 352   | 0.85 | 4.91x10 <sup>-1</sup> | 0.73  | -4.61 | 0.24  | mmu-miR-23a     |
| 400   | 0.85 | 4.91x10 <sup>-1</sup> | 0.73  | -4.61 | 0.25  | mmu-let-7c      |
| 10129 | 0.85 | 4.92x10 <sup>-1</sup> | 0.73  | -4.61 | 0.21  | mmu-miR-10a     |
| 9315  | 0.85 | 4.92x10 <sup>-1</sup> | -0.73 | -4.61 | -0.49 | mmu-miR-196a    |
| 1029  | 0.85 | 4.93x10 <sup>-1</sup> | 0.73  | -4.61 | 0.40  | mmu-miR-872     |
| 10969 | 0.85 | 4.93x10 <sup>-1</sup> | -0.73 | -4.61 | -0.32 | mmu-miR-503     |
| 2081  | 0.85 | 4.95x10 <sup>-1</sup> | 0.73  | -4.61 | 0.27  | mmu-miR-30b*    |
| 14614 | 0.85 | 4.95x10 <sup>-1</sup> | 0.73  | -4.61 | 0.25  |                 |
| 15132 | 0.85 | 4.95x10 <sup>-1</sup> | 0.73  | -4.61 | 0.53  | mmu-miR-1906    |
| 9990  | 0.85 | 4.96x10 <sup>-1</sup> | 0.73  | -4.61 | 0.18  | mmu-miR-322     |
| 2917  | 0.85 | 4.96x10 <sup>-1</sup> | 0.73  | -4.61 | 0.21  | mmu-let-7i      |
| 7311  | 0.85 | 4.97x10 <sup>-1</sup> | -0.73 | -4.61 | -0.49 | mmu-miR-142-3p  |
| 12818 | 0.85 | 4.97x10 <sup>-1</sup> | 0.73  | -4.61 | 0.17  | mmu-miR-24      |
| 6189  | 0.85 | 4.97x10 <sup>-1</sup> | 0.72  | -4.61 | 0.22  | mmu-miR-345-5p  |
| 3798  | 0.85 | 4.98x10 <sup>-1</sup> | 0.72  | -4.61 | 0.20  | mmu-miR-103     |
| 1868  | 0.85 | 4.99x10 <sup>-1</sup> | 0.72  | -4.61 | 0.33  | mmu-miR-10b     |
| 12341 | 0.85 | 4.99x10 <sup>-1</sup> | -0.72 | -4.61 | -1.12 | mmu-miR-668     |
| 997   | 0.85 | 4.99x10 <sup>-1</sup> | -0.72 | -4.61 | -0.39 | mmu-miR-669a    |
| 5576  | 0.85 | 4.99x10 <sup>-1</sup> | -0.72 | -4.61 | -0.84 | mmu-miR-105     |
| 9218  | 0.85 | 5.00x10 <sup>-1</sup> | 0.72  | -4.61 | 0.30  | mmu-miR-155     |
| 8049  | 0.85 | 5.00x10 <sup>-1</sup> | 0.72  | -4.61 | 0.19  | mmu-miR-423-5p  |
| 9061  | 0.85 | 5.01x10 <sup>-1</sup> | 0.72  | -4.61 | 0.25  | mmu-miR-103     |
| 10358 | 0.85 | 5.01x10 <sup>-1</sup> | 0.72  | -4.61 | 0.53  | mmu-miR-224     |
| 7906  | 0.85 | 5.02x10 <sup>-1</sup> | -0.72 | -4.61 | -1.03 | mmu-miR-697     |
| 8762  | 0.85 | 5.02x10 <sup>-1</sup> | 0.72  | -4.61 | 0.37  | mmu-miR-206     |
| 10504 | 0.85 | 5.02x10 <sup>-1</sup> | 0.72  | -4.61 | 0.64  | mmu-miR-125b-5p |
| 5706  | 0.85 | 5.02x10 <sup>-1</sup> | 0.72  | -4.61 | 0.20  | mmu-let-7b      |
| 13430 | 0.85 | 5.02x10 <sup>-1</sup> | 0.72  | -4.61 | 0.31  | mmu-miR-26b     |
| 2979  | 0.85 | 5.03x10 <sup>-1</sup> | 0.71  | -4.61 | 0.20  | mmu-miR-15b     |
| 12309 | 0.85 | 5.03x10 <sup>-1</sup> | 0.71  | -4.61 | 0.26  |                 |
| 4703  | 0.85 | 5.04x10 <sup>-1</sup> | -0.71 | -4.61 | -0.43 | mmu-let-7f*     |
| 9426  | 0.85 | 5.04x10 <sup>-1</sup> | -0.71 | -4.61 | -0.21 | mmu-miR-221     |
| 3646  | 0.85 | 5.04x10 <sup>-1</sup> | 0.71  | -4.61 | 1.31  |                 |
| 15740 | 0.85 | 5.05x10 <sup>-1</sup> | -0.71 | -4.61 | -0.28 | mmu-miR-542-5p  |
| 261   | 0.85 | 5.05x10 <sup>-1</sup> | 0.71  | -4.61 | 0.25  |                 |
| 13246 | 0.85 | 5.05x10 <sup>-1</sup> | 0.71  | -4.61 | 0.21  | mmu-miR-27a     |
| 1019  | 0.85 | 5.05x10 <sup>-1</sup> | 0.71  | -4.61 | 0.38  | mmu-miR-425     |
| 9425  | 0.85 | 5.05x10 <sup>-1</sup> | 0.71  | -4.61 | 0.19  |                 |
| 1036  | 0.85 | 5.06x10 <sup>-1</sup> | -0.71 | -4.61 | -1.44 | mmu-miR-146a    |
| 5343  | 0.85 | 5.06x10 <sup>-1</sup> | 0.71  | -4.61 | 0.82  | mmu-miR-29a*    |
| 7179  | 0.85 | 5.06x10 <sup>-1</sup> | 0.71  | -4.61 | 0.40  | mmu-miR-539     |

|       |      |                       |       |       |       |                 |
|-------|------|-----------------------|-------|-------|-------|-----------------|
| 9386  | 0.85 | $5.06 \times 10^{-1}$ | 0.71  | -4.61 | 0.26  | mmu-miR-19b     |
| 14428 | 0.85 | $5.07 \times 10^{-1}$ | 0.71  | -4.61 | 0.21  | mmu-let-7b      |
| 8985  | 0.85 | $5.07 \times 10^{-1}$ | -0.71 | -4.61 | -0.18 | mmu-miR-103     |
| 265   | 0.85 | $5.07 \times 10^{-1}$ | 0.71  | -4.61 | 0.21  | mmu-miR-345-5p  |
| 13431 | 0.85 | $5.07 \times 10^{-1}$ | 0.71  | -4.61 | 0.31  | mmu-miR-741     |
| 8433  | 0.85 | $5.08 \times 10^{-1}$ | 0.71  | -4.61 | 0.57  | mmu-miR-484     |
| 13251 | 0.85 | $5.08 \times 10^{-1}$ | -0.70 | -4.61 | -0.35 | mmu-miR-324-3p  |
| 11716 | 0.85 | $5.08 \times 10^{-1}$ | -0.70 | -4.61 | -0.21 | mmu-let-7d      |
| 15529 | 0.85 | $5.09 \times 10^{-1}$ | -0.70 | -4.61 | -0.83 | mmu-miR-805     |
| 11390 | 0.85 | $5.09 \times 10^{-1}$ | -0.70 | -4.61 | -0.34 | mmu-miR-300*    |
| 5414  | 0.85 | $5.09 \times 10^{-1}$ | 0.70  | -4.61 | 0.16  | mmu-miR-107     |
| 11811 | 0.85 | $5.10 \times 10^{-1}$ | 0.70  | -4.61 | 0.21  | mmu-miR-345-5p  |
| 5539  | 0.85 | $5.10 \times 10^{-1}$ | -0.70 | -4.61 | -0.53 | mg hv-miR-M1-2  |
| 10486 | 0.85 | $5.10 \times 10^{-1}$ | 0.70  | -4.61 | 0.26  | mmu-miR-196a    |
| 13370 | 0.85 | $5.10 \times 10^{-1}$ | 0.70  | -4.61 | 0.16  | mmu-let-7i      |
| 6253  | 0.85 | $5.10 \times 10^{-1}$ | 0.70  | -4.61 | 0.38  |                 |
| 854   | 0.85 | $5.11 \times 10^{-1}$ | -0.70 | -4.61 | -0.59 | mmu-miR-30e*    |
| 11153 | 0.85 | $5.12 \times 10^{-1}$ | -0.70 | -4.61 | -0.69 | mmu-miR-374     |
| 14802 | 0.85 | $5.12 \times 10^{-1}$ | -0.70 | -4.61 | -0.37 | mmu-miR-532-5p  |
| 3419  | 0.85 | $5.12 \times 10^{-1}$ | -0.70 | -4.61 | -0.21 | mmu-miR-96      |
| 562   | 0.85 | $5.12 \times 10^{-1}$ | 0.70  | -4.61 | 0.31  | mmu-miR-140     |
| 2292  | 0.85 | $5.12 \times 10^{-1}$ | -0.70 | -4.61 | -0.16 | mmu-miR-15a     |
| 13142 | 0.85 | $5.12 \times 10^{-1}$ | 0.70  | -4.61 | 0.17  | mmu-miR-331-3p  |
| 2931  | 0.85 | $5.13 \times 10^{-1}$ | 0.70  | -4.61 | 0.23  | mmu-let-7e      |
| 6693  | 0.85 | $5.13 \times 10^{-1}$ | 0.70  | -4.61 | 0.21  | mmu-miR-15b     |
| 10390 | 0.85 | $5.14 \times 10^{-1}$ | 0.70  | -4.61 | 0.53  | mmu-miR-93      |
| 9413  | 0.85 | $5.14 \times 10^{-1}$ | 0.69  | -4.61 | 0.18  | mmu-miR-23a     |
| 14069 | 0.85 | $5.14 \times 10^{-1}$ | 0.69  | -4.61 | 0.21  | mmu-let-7a      |
| 3179  | 0.85 | $5.14 \times 10^{-1}$ | -0.69 | -4.61 | -0.25 |                 |
| 7374  | 0.85 | $5.15 \times 10^{-1}$ | 0.69  | -4.61 | 0.24  |                 |
| 7355  | 0.85 | $5.15 \times 10^{-1}$ | -0.69 | -4.61 | -0.29 | mmu-miR-19b     |
| 10943 | 0.85 | $5.15 \times 10^{-1}$ | 0.69  | -4.61 | 0.17  | mmu-miR-342-3p  |
| 15159 | 0.85 | $5.15 \times 10^{-1}$ | 0.69  | -4.61 | 1.65  |                 |
| 7526  | 0.85 | $5.16 \times 10^{-1}$ | 0.69  | -4.61 | 0.24  |                 |
| 2848  | 0.85 | $5.16 \times 10^{-1}$ | 0.69  | -4.61 | 0.17  | mmu-miR-342-3p  |
| 1038  | 0.85 | $5.16 \times 10^{-1}$ | 0.69  | -4.61 | 0.18  |                 |
| 5078  | 0.85 | $5.16 \times 10^{-1}$ | 0.69  | -4.61 | 0.40  | mmu-miR-590-3p  |
| 12845 | 0.85 | $5.16 \times 10^{-1}$ | 0.69  | -4.61 | 0.20  | mmu-let-7c      |
| 7518  | 0.85 | $5.17 \times 10^{-1}$ | -0.69 | -4.61 | -0.40 | mmu-miR-30e     |
| 695   | 0.85 | $5.17 \times 10^{-1}$ | -0.69 | -4.61 | -0.88 | mmu-let-7b*     |
| 5009  | 0.85 | $5.18 \times 10^{-1}$ | 0.69  | -4.61 | 0.65  | mmu-miR-125a-3p |
| 6344  | 0.85 | $5.18 \times 10^{-1}$ | 0.69  | -4.61 | 0.24  | mmu-miR-196a    |
| 8157  | 0.85 | $5.19 \times 10^{-1}$ | -0.69 | -4.61 | -0.50 | mmu-miR-30c-1*  |
| 2082  | 0.85 | $5.19 \times 10^{-1}$ | 0.69  | -4.61 | 0.22  | mmu-miR-196a    |
| 521   | 0.85 | $5.19 \times 10^{-1}$ | -0.69 | -4.61 | -1.74 | mmu-miR-702     |
| 4097  | 0.85 | $5.19 \times 10^{-1}$ | -0.69 | -4.61 | -0.24 | mmu-miR-26b     |

|       |      |                       |       |       |       |                |
|-------|------|-----------------------|-------|-------|-------|----------------|
| 790   | 0.85 | $5.19 \times 10^{-1}$ | -0.69 | -4.61 | -0.95 | mmu-miR-467c   |
| 9263  | 0.85 | $5.19 \times 10^{-1}$ | 0.69  | -4.61 | 0.38  | mmu-miR-191*   |
| 3039  | 0.85 | $5.19 \times 10^{-1}$ | 0.69  | -4.61 | 0.18  | mmu-let-7c     |
| 1400  | 0.85 | $5.19 \times 10^{-1}$ | 0.69  | -4.61 | 0.42  | mmu-miR-741    |
| 11836 | 0.85 | $5.20 \times 10^{-1}$ | -0.68 | -4.61 | -0.31 | mmu-miR-30a*   |
| 8905  | 0.85 | $5.20 \times 10^{-1}$ | 0.68  | -4.61 | 0.34  | mmu-miR-362-5p |
| 3605  | 0.85 | $5.21 \times 10^{-1}$ | 0.68  | -4.61 | 0.24  |                |
| 10368 | 0.85 | $5.21 \times 10^{-1}$ | 0.68  | -4.61 | 0.17  | mmu-miR-10a    |
| 2935  | 0.85 | $5.22 \times 10^{-1}$ | -0.68 | -4.61 | -0.20 | mmu-miR-652    |
| 10895 | 0.85 | $5.22 \times 10^{-1}$ | 0.68  | -4.61 | 0.20  | mmu-miR-500    |
| 15661 | 0.85 | $5.22 \times 10^{-1}$ | -0.68 | -4.61 | -0.31 |                |
| 8448  | 0.85 | $5.22 \times 10^{-1}$ | -0.68 | -4.61 | -0.59 | mmu-miR-30b*   |
| 2121  | 0.85 | $5.23 \times 10^{-1}$ | -0.68 | -4.61 | -0.74 | mmu-miR-224    |
| 13215 | 0.85 | $5.23 \times 10^{-1}$ | 0.68  | -4.61 | 0.38  |                |
| 6768  | 0.85 | $5.24 \times 10^{-1}$ | -0.68 | -4.61 | -0.41 | mmu-miR-181d   |
| 13363 | 0.85 | $5.24 \times 10^{-1}$ | 0.68  | -4.61 | 0.25  | mmu-miR-106b   |
| 15117 | 0.85 | $5.25 \times 10^{-1}$ | 0.68  | -4.61 | 0.18  | mmu-miR-15b    |
| 12932 | 0.85 | $5.25 \times 10^{-1}$ | -0.68 | -4.61 | -0.24 | mmu-miR-29b    |
| 572   | 0.85 | $5.25 \times 10^{-1}$ | 0.68  | -4.61 | 0.81  | mmu-miR-574-5p |
| 9338  | 0.85 | $5.26 \times 10^{-1}$ | 0.67  | -4.61 | 0.35  | mmu-miR-18a    |
| 15444 | 0.85 | $5.26 \times 10^{-1}$ | -0.67 | -4.61 | -0.39 | mmu-miR-30a*   |
| 11752 | 0.85 | $5.27 \times 10^{-1}$ | 0.67  | -4.61 | 0.89  | mmu-miR-574-5p |
| 4544  | 0.85 | $5.27 \times 10^{-1}$ | -0.67 | -4.61 | -0.28 | mmu-miR-10b    |
| 2790  | 0.85 | $5.27 \times 10^{-1}$ | 0.67  | -4.61 | 0.43  | mmu-miR-99b*   |
| 292   | 0.85 | $5.28 \times 10^{-1}$ | -0.67 | -4.61 | -0.45 |                |
| 9776  | 0.85 | $5.29 \times 10^{-1}$ | 0.67  | -4.61 | 0.43  | mmu-miR-30b*   |
| 788   | 0.85 | $5.29 \times 10^{-1}$ | 0.67  | -4.61 | 0.29  | mmu-miR-296-5p |
| 11986 | 0.86 | $5.29 \times 10^{-1}$ | 0.67  | -4.61 | 0.21  | mmu-miR-196a   |
| 1953  | 0.86 | $5.30 \times 10^{-1}$ | -0.67 | -4.61 | -0.31 | mmu-miR-335-3p |
| 13621 | 0.86 | $5.31 \times 10^{-1}$ | 0.67  | -4.61 | 0.15  | mmu-miR-196b   |
| 3223  | 0.86 | $5.32 \times 10^{-1}$ | -0.66 | -4.61 | -0.37 | mmu-miR-146a   |
| 3126  | 0.86 | $5.32 \times 10^{-1}$ | 0.66  | -4.61 | 0.18  | mmu-miR-149    |
| 12243 | 0.86 | $5.34 \times 10^{-1}$ | 0.66  | -4.61 | 1.85  |                |
| 3464  | 0.86 | $5.35 \times 10^{-1}$ | 0.66  | -4.61 | 0.20  | mmu-miR-103    |
| 2737  | 0.86 | $5.35 \times 10^{-1}$ | 0.66  | -4.61 | 0.15  | mmu-miR-322    |
| 15742 | 0.86 | $5.35 \times 10^{-1}$ | -0.66 | -4.61 | -0.41 |                |
| 13345 | 0.86 | $5.35 \times 10^{-1}$ | -0.66 | -4.61 | -1.18 | mmu-miR-509-3p |
| 15218 | 0.86 | $5.35 \times 10^{-1}$ | 0.66  | -4.61 | 0.23  |                |
| 13969 | 0.86 | $5.36 \times 10^{-1}$ | 0.66  | -4.61 | 0.33  | mmu-miR-672    |
| 15669 | 0.86 | $5.37 \times 10^{-1}$ | -0.66 | -4.61 | -0.19 | mmu-let-7d     |
| 5048  | 0.86 | $5.37 \times 10^{-1}$ | -0.66 | -4.61 | -0.27 | mmu-miR-669g   |
| 11880 | 0.86 | $5.38 \times 10^{-1}$ | 0.65  | -4.61 | 0.18  | mmu-let-7c     |
| 4662  | 0.86 | $5.38 \times 10^{-1}$ | 0.65  | -4.61 | 0.18  | mmu-let-7b     |
| 8170  | 0.86 | $5.38 \times 10^{-1}$ | -0.65 | -4.61 | -0.61 | mmu-miR-300*   |
| 4166  | 0.86 | $5.38 \times 10^{-1}$ | 0.65  | -4.61 | 0.17  |                |
| 14813 | 0.86 | $5.39 \times 10^{-1}$ | 0.65  | -4.61 | 0.33  | mmu-miR-702    |

|       |      |                       |       |       |       |                 |
|-------|------|-----------------------|-------|-------|-------|-----------------|
| 8165  | 0.86 | $5.39 \times 10^{-1}$ | 0.65  | -4.61 | 0.15  |                 |
| 363   | 0.86 | $5.40 \times 10^{-1}$ | 0.65  | -4.61 | 0.75  | mmu-miR-705     |
| 11059 | 0.86 | $5.41 \times 10^{-1}$ | 0.65  | -4.61 | 0.24  |                 |
| 10170 | 0.86 | $5.41 \times 10^{-1}$ | 0.65  | -4.61 | 0.16  | mmu-miR-103     |
| 1765  | 0.86 | $5.41 \times 10^{-1}$ | 0.65  | -4.61 | 0.34  | mmu-miR-423-5p  |
| 8086  | 0.86 | $5.41 \times 10^{-1}$ | 0.65  | -4.61 | 0.17  | mmu-miR-361     |
| 10810 | 0.86 | $5.42 \times 10^{-1}$ | 0.65  | -4.61 | 0.20  | mmu-let-7e      |
| 6596  | 0.86 | $5.42 \times 10^{-1}$ | 0.65  | -4.61 | 0.20  | mmu-miR-532-5p  |
| 920   | 0.86 | $5.43 \times 10^{-1}$ | 0.65  | -4.61 | 0.22  | mmu-miR-196a    |
| 4404  | 0.86 | $5.43 \times 10^{-1}$ | 0.65  | -4.61 | 0.21  | mmu-let-7e      |
| 4412  | 0.86 | $5.43 \times 10^{-1}$ | 0.65  | -4.61 | 0.29  | mmu-miR-18a     |
| 824   | 0.86 | $5.44 \times 10^{-1}$ | 0.64  | -4.61 | 0.57  | mmu-miR-26b     |
| 6053  | 0.86 | $5.44 \times 10^{-1}$ | -0.64 | -4.61 | -0.24 | mmu-miR-409-3p  |
| 3128  | 0.86 | $5.45 \times 10^{-1}$ | 0.64  | -4.61 | 1.39  | mmu-miR-380-3p  |
| 7284  | 0.86 | $5.46 \times 10^{-1}$ | -0.64 | -4.61 | -1.96 | mmu-miR-29a*    |
| 6771  | 0.86 | $5.46 \times 10^{-1}$ | 0.64  | -4.61 | 0.16  | mmu-miR-324-5p  |
| 2985  | 0.86 | $5.46 \times 10^{-1}$ | 0.64  | -4.61 | 0.22  |                 |
| 13141 | 0.86 | $5.47 \times 10^{-1}$ | 0.64  | -4.61 | 0.15  | mmu-miR-24      |
| 11203 | 0.86 | $5.47 \times 10^{-1}$ | 0.64  | -4.61 | 0.42  |                 |
| 5727  | 0.86 | $5.47 \times 10^{-1}$ | -0.64 | -4.61 | -0.21 | mmu-miR-191*    |
| 14741 | 0.86 | $5.47 \times 10^{-1}$ | -0.64 | -4.61 | -0.22 | mmu-miR-26b     |
| 5404  | 0.86 | $5.47 \times 10^{-1}$ | -0.64 | -4.61 | -0.33 | mmu-miR-298     |
| 12346 | 0.86 | $5.48 \times 10^{-1}$ | 0.64  | -4.61 | 0.22  |                 |
| 13406 | 0.86 | $5.48 \times 10^{-1}$ | -0.64 | -4.61 | -0.58 | mghv-miR-M1-2   |
| 15708 | 0.86 | $5.48 \times 10^{-1}$ | 0.64  | -4.61 | 0.68  | mmu-miR-291b-5p |
| 1760  | 0.86 | $5.48 \times 10^{-1}$ | -0.64 | -4.61 | -0.15 | mmu-miR-324-5p  |
| 55    | 0.86 | $5.48 \times 10^{-1}$ | 0.64  | -4.61 | 0.56  | mmu-miR-697     |
| 11649 | 0.86 | $5.49 \times 10^{-1}$ | 0.64  | -4.61 | 0.55  | mmu-miR-142-3p  |
| 1207  | 0.86 | $5.49 \times 10^{-1}$ | -0.64 | -4.61 | -0.21 | mmu-miR-672     |
| 12022 | 0.86 | $5.49 \times 10^{-1}$ | 0.64  | -4.61 | 0.36  |                 |
| 7614  | 0.86 | $5.49 \times 10^{-1}$ | 0.64  | -4.61 | 1.93  | mmu-miR-135a    |
| 11931 | 0.86 | $5.50 \times 10^{-1}$ | 0.64  | -4.61 | 0.59  | mmu-miR-202-3p  |
| 8364  | 0.86 | $5.50 \times 10^{-1}$ | 0.63  | -4.61 | 0.20  | mmu-let-7a      |
| 846   | 0.86 | $5.50 \times 10^{-1}$ | -0.63 | -4.61 | -0.51 |                 |
| 10216 | 0.87 | $5.52 \times 10^{-1}$ | 0.63  | -4.61 | 0.28  | mmu-miR-18a     |
| 11515 | 0.87 | $5.52 \times 10^{-1}$ | 0.63  | -4.61 | 0.18  | mmu-miR-331-3p  |
| 3536  | 0.87 | $5.52 \times 10^{-1}$ | 0.63  | -4.61 | 0.23  |                 |
| 1910  | 0.87 | $5.53 \times 10^{-1}$ | 0.63  | -4.61 | 0.37  | mmu-miR-30a*    |
| 15006 | 0.87 | $5.53 \times 10^{-1}$ | 0.63  | -4.61 | 0.68  | mmu-miR-135b    |
| 8613  | 0.87 | $5.54 \times 10^{-1}$ | -0.63 | -4.61 | -0.86 | mmu-miR-320     |
| 9334  | 0.87 | $5.54 \times 10^{-1}$ | -0.63 | -4.61 | -0.18 | mmu-miR-324-5p  |
| 4259  | 0.87 | $5.54 \times 10^{-1}$ | 0.63  | -4.61 | 0.20  | mmu-let-7c      |
| 7317  | 0.87 | $5.55 \times 10^{-1}$ | -0.63 | -4.61 | -0.69 | mmu-miR-142-3p  |
| 3780  | 0.87 | $5.56 \times 10^{-1}$ | -0.62 | -4.61 | -0.17 | mmu-let-7f      |
| 83    | 0.87 | $5.56 \times 10^{-1}$ | 0.62  | -4.61 | 0.16  |                 |
| 2446  | 0.87 | $5.57 \times 10^{-1}$ | 0.62  | -4.61 | 0.22  |                 |

|       |      |                       |       |       |       |                |
|-------|------|-----------------------|-------|-------|-------|----------------|
| 14376 | 0.87 | $5.57 \times 10^{-1}$ | -0.62 | -4.61 | -0.83 | mghv-miR-M1-9  |
| 11872 | 0.87 | $5.57 \times 10^{-1}$ | 0.62  | -4.61 | 0.70  | mmu-miR-190b   |
| 9295  | 0.87 | $5.58 \times 10^{-1}$ | -0.62 | -4.61 | -1.00 | mmu-miR-690    |
| 14463 | 0.87 | $5.58 \times 10^{-1}$ | -0.62 | -4.61 | -0.42 | mmu-miR-362-5p |
| 6079  | 0.87 | $5.59 \times 10^{-1}$ | 0.62  | -4.61 | 0.23  |                |
| 1104  | 0.87 | $5.59 \times 10^{-1}$ | 0.62  | -4.61 | 0.17  | mmu-let-7i     |
| 3661  | 0.87 | $5.59 \times 10^{-1}$ | 0.62  | -4.61 | 0.61  |                |
| 4805  | 0.87 | $5.59 \times 10^{-1}$ | -0.62 | -4.61 | -0.17 | mghv-miR-M1-2  |
| 10816 | 0.87 | $5.59 \times 10^{-1}$ | -0.62 | -4.61 | -0.81 | mmu-miR-684    |
| 11670 | 0.87 | $5.60 \times 10^{-1}$ | 0.62  | -4.61 | 0.35  | mmu-miR-135b   |
| 9416  | 0.87 | $5.60 \times 10^{-1}$ | 0.62  | -4.61 | 0.17  | mmu-let-7c     |
| 12532 | 0.87 | $5.61 \times 10^{-1}$ | 0.62  | -4.61 | 0.18  | mmu-miR-16     |
| 12484 | 0.87 | $5.62 \times 10^{-1}$ | 0.61  | -4.61 | 0.49  | mmu-miR-193    |
| 13933 | 0.87 | $5.62 \times 10^{-1}$ | 0.61  | -4.61 | 0.53  | mmu-miR-715    |
| 13885 | 0.87 | $5.62 \times 10^{-1}$ | 0.61  | -4.61 | 0.95  | mmu-miR-1187   |
| 7941  | 0.87 | $5.63 \times 10^{-1}$ | 0.61  | -4.61 | 0.19  |                |
| 12194 | 0.87 | $5.63 \times 10^{-1}$ | 0.61  | -4.61 | 0.57  | mmu-miR-1904   |
| 646   | 0.87 | $5.63 \times 10^{-1}$ | 0.61  | -4.61 | 0.19  | mmu-let-7a     |
| 5994  | 0.87 | $5.63 \times 10^{-1}$ | 0.61  | -4.61 | 0.39  | mmu-miR-1906   |
| 10150 | 0.87 | $5.63 \times 10^{-1}$ | 0.61  | -4.61 | 0.18  | mmu-let-7e     |
| 3986  | 0.87 | $5.63 \times 10^{-1}$ | -0.61 | -4.61 | -0.54 | mmu-miR-26b*   |
| 1363  | 0.87 | $5.65 \times 10^{-1}$ | 0.61  | -4.61 | 0.19  |                |
| 4427  | 0.87 | $5.65 \times 10^{-1}$ | -0.61 | -4.61 | -0.40 | mmu-miR-128    |
| 13056 | 0.87 | $5.65 \times 10^{-1}$ | -0.61 | -4.61 | -0.18 | mmu-let-7d     |
| 14812 | 0.87 | $5.65 \times 10^{-1}$ | -0.61 | -4.61 | -0.37 | mmu-miR-30a*   |
| 9556  | 0.87 | $5.66 \times 10^{-1}$ | 0.61  | -4.61 | 0.56  | mmu-miR-135a   |
| 8694  | 0.87 | $5.66 \times 10^{-1}$ | 0.61  | -4.61 | 0.89  | mmu-miR-382    |
| 6545  | 0.87 | $5.66 \times 10^{-1}$ | 0.61  | -4.61 | 0.69  | mmu-miR-598    |
| 7092  | 0.87 | $5.66 \times 10^{-1}$ | 0.61  | -4.61 | 0.22  | mmu-miR-29c    |
| 12760 | 0.87 | $5.67 \times 10^{-1}$ | 0.61  | -4.61 | 0.52  | mmu-miR-350    |
| 12915 | 0.87 | $5.67 \times 10^{-1}$ | 0.61  | -4.61 | 0.15  | mmu-miR-24     |
| 6844  | 0.87 | $5.68 \times 10^{-1}$ | 0.61  | -4.61 | 0.18  | mmu-miR-223    |
| 15560 | 0.87 | $5.68 \times 10^{-1}$ | -0.60 | -4.61 | -0.33 | mmu-miR-706    |
| 2526  | 0.87 | $5.68 \times 10^{-1}$ | 0.60  | -4.61 | 0.81  | mmu-miR-148b   |
| 9840  | 0.87 | $5.71 \times 10^{-1}$ | 0.60  | -4.61 | 0.19  | mmu-let-7a     |
| 1159  | 0.87 | $5.71 \times 10^{-1}$ | -0.60 | -4.61 | -0.27 | mmu-miR-30c-2* |
| 13929 | 0.87 | $5.72 \times 10^{-1}$ | 0.60  | -4.61 | 0.19  | mmu-let-7c     |
| 8019  | 0.87 | $5.72 \times 10^{-1}$ | 0.60  | -4.61 | 0.21  |                |
| 16    | 0.87 | $5.72 \times 10^{-1}$ | 0.60  | -4.61 | 0.29  | mmu-miR-30e    |
| 15471 | 0.87 | $5.73 \times 10^{-1}$ | -0.60 | -4.62 | -0.57 | mmu-miR-22*    |
| 13168 | 0.87 | $5.73 \times 10^{-1}$ | 0.60  | -4.62 | 0.20  |                |
| 138   | 0.87 | $5.73 \times 10^{-1}$ | -0.60 | -4.62 | -0.27 | mmu-miR-30a*   |
| 9183  | 0.87 | $5.73 \times 10^{-1}$ | -0.60 | -4.62 | -0.17 | mmu-miR-98     |
| 2193  | 0.87 | $5.73 \times 10^{-1}$ | -0.60 | -4.62 | -0.20 | mmu-let-7d     |
| 3409  | 0.87 | $5.74 \times 10^{-1}$ | -0.60 | -4.62 | -0.88 | mmu-miR-672    |
| 8866  | 0.87 | $5.74 \times 10^{-1}$ | 0.59  | -4.62 | 0.40  | mmu-miR-702    |

|       |      |                       |       |       |       |                 |
|-------|------|-----------------------|-------|-------|-------|-----------------|
| 6526  | 0.87 | $5.74 \times 10^{-1}$ | -0.59 | -4.62 | -0.19 | mmu-let-7d      |
| 3259  | 0.87 | $5.75 \times 10^{-1}$ | 0.59  | -4.62 | 0.16  |                 |
| 6843  | 0.87 | $5.75 \times 10^{-1}$ | 0.59  | -4.62 | 0.18  | mmu-let-7a      |
| 3753  | 0.87 | $5.76 \times 10^{-1}$ | 0.59  | -4.62 | 0.17  | mmu-miR-28      |
| 2756  | 0.87 | $5.77 \times 10^{-1}$ | 0.59  | -4.62 | 0.17  | mmu-let-7b      |
| 10979 | 0.87 | $5.78 \times 10^{-1}$ | 0.59  | -4.62 | 0.18  | mmu-let-7i      |
| 12662 | 0.87 | $5.78 \times 10^{-1}$ | -0.59 | -4.62 | -0.33 | mmu-miR-26a     |
| 5276  | 0.87 | $5.79 \times 10^{-1}$ | -0.59 | -4.62 | -0.38 | mmu-let-7f*     |
| 14991 | 0.87 | $5.79 \times 10^{-1}$ | 0.59  | -4.62 | 0.17  | mmu-let-7b      |
| 3939  | 0.87 | $5.79 \times 10^{-1}$ | 0.59  | -4.62 | 0.24  | mmu-miR-331-3p  |
| 13266 | 0.87 | $5.80 \times 10^{-1}$ | -0.59 | -4.62 | -0.15 | mmu-miR-130a    |
| 9925  | 0.87 | $5.80 \times 10^{-1}$ | 0.59  | -4.62 | 0.30  | mmu-miR-210     |
| 9845  | 0.87 | $5.80 \times 10^{-1}$ | 0.59  | -4.62 | 0.69  | mmu-miR-715     |
| 13754 | 0.87 | $5.80 \times 10^{-1}$ | 0.59  | -4.62 | 0.16  | mmu-let-7a      |
| 10225 | 0.87 | $5.80 \times 10^{-1}$ | 0.59  | -4.62 | 0.17  | mmu-let-7b      |
| 11427 | 0.87 | $5.80 \times 10^{-1}$ | 0.59  | -4.62 | 0.16  | mmu-miR-361     |
| 6539  | 0.87 | $5.81 \times 10^{-1}$ | -0.58 | -4.62 | -0.25 | mmu-miR-191*    |
| 9248  | 0.87 | $5.81 \times 10^{-1}$ | 0.58  | -4.62 | 0.53  | mmu-miR-298     |
| 10773 | 0.87 | $5.81 \times 10^{-1}$ | -0.58 | -4.62 | -0.18 | mmu-let-7d      |
| 11531 | 0.87 | $5.81 \times 10^{-1}$ | 0.58  | -4.62 | 0.20  | mmu-miR-29c     |
| 9650  | 0.88 | $5.82 \times 10^{-1}$ | 0.58  | -4.62 | 0.18  | mmu-miR-210     |
| 3540  | 0.88 | $5.83 \times 10^{-1}$ | 0.58  | -4.62 | 0.17  | mmu-miR-425     |
| 780   | 0.88 | $5.83 \times 10^{-1}$ | 0.58  | -4.62 | 0.14  | mmu-miR-322     |
| 2080  | 0.88 | $5.83 \times 10^{-1}$ | -0.58 | -4.62 | -0.19 | mmu-miR-10b     |
| 5866  | 0.88 | $5.83 \times 10^{-1}$ | 0.58  | -4.62 | 0.39  | mmu-miR-30e     |
| 10477 | 0.88 | $5.83 \times 10^{-1}$ | 0.58  | -4.62 | 0.31  | mmu-miR-193b    |
| 7215  | 0.88 | $5.84 \times 10^{-1}$ | -0.58 | -4.62 | -0.68 | mmu-miR-450b-5p |
| 9493  | 0.88 | $5.84 \times 10^{-1}$ | 0.58  | -4.62 | 0.18  | mmu-let-7c      |
| 14055 | 0.88 | $5.84 \times 10^{-1}$ | 0.58  | -4.62 | 0.34  | mmu-miR-350     |
| 4667  | 0.88 | $5.85 \times 10^{-1}$ | 0.58  | -4.62 | 0.38  | mcmv-miR-m88-1* |
| 8167  | 0.88 | $5.85 \times 10^{-1}$ | 0.58  | -4.62 | 0.28  | mmu-miR-140*    |
| 9443  | 0.88 | $5.85 \times 10^{-1}$ | -0.58 | -4.62 | -0.22 | mmu-miR-155     |
| 12294 | 0.88 | $5.86 \times 10^{-1}$ | 0.58  | -4.62 | 0.28  | mmu-miR-672     |
| 11627 | 0.88 | $5.86 \times 10^{-1}$ | -0.58 | -4.62 | -0.18 | mmu-let-7g      |
| 1385  | 0.88 | $5.87 \times 10^{-1}$ | 0.58  | -4.62 | 0.19  | mmu-let-7e      |
| 10051 | 0.88 | $5.87 \times 10^{-1}$ | 0.58  | -4.62 | 0.51  | mmu-miR-154*    |
| 10135 | 0.88 | $5.87 \times 10^{-1}$ | 0.57  | -4.62 | 0.21  | mmu-miR-30d     |
| 12496 | 0.88 | $5.87 \times 10^{-1}$ | 0.57  | -4.62 | 0.17  | mmu-miR-350     |
| 675   | 0.88 | $5.88 \times 10^{-1}$ | 0.57  | -4.62 | 0.18  |                 |
| 5083  | 0.88 | $5.88 \times 10^{-1}$ | 0.57  | -4.62 | 0.14  | mmu-miR-26a     |
| 9825  | 0.88 | $5.89 \times 10^{-1}$ | 0.57  | -4.62 | 0.17  |                 |
| 5462  | 0.88 | $5.89 \times 10^{-1}$ | -0.57 | -4.62 | -0.62 | mmu-miR-294     |
| 6074  | 0.88 | $5.90 \times 10^{-1}$ | -0.57 | -4.62 | -0.16 | mmu-let-7d      |
| 8292  | 0.88 | $5.90 \times 10^{-1}$ | 0.57  | -4.62 | 0.62  | mmu-miR-126-3p  |
| 5817  | 0.88 | $5.90 \times 10^{-1}$ | 0.57  | -4.62 | 0.16  | mmu-let-7c      |
| 8033  | 0.88 | $5.91 \times 10^{-1}$ | 0.57  | -4.62 | 0.16  | mmu-let-7i      |



|       |      |                       |       |       |       |                |
|-------|------|-----------------------|-------|-------|-------|----------------|
| 1903  | 0.88 | $5.91 \times 10^{-1}$ | 0.57  | -4.62 | 0.19  |                |
| 13338 | 0.88 | $5.92 \times 10^{-1}$ | 0.57  | -4.62 | 0.26  | mmu-miR-210    |
| 11232 | 0.88 | $5.92 \times 10^{-1}$ | 0.57  | -4.62 | 0.20  |                |
| 4673  | 0.88 | $5.92 \times 10^{-1}$ | 0.57  | -4.62 | 0.20  | mmu-miR-15b    |
| 1353  | 0.88 | $5.93 \times 10^{-1}$ | -0.57 | -4.62 | -0.13 | mmu-miR-15a    |
| 9909  | 0.88 | $5.93 \times 10^{-1}$ | -0.56 | -4.62 | -0.17 | mmu-miR-23b    |
| 832   | 0.88 | $5.94 \times 10^{-1}$ | -0.56 | -4.62 | -1.00 | mmu-miR-140*   |
| 13739 | 0.88 | $5.96 \times 10^{-1}$ | 0.56  | -4.62 | 0.37  | mmu-miR-130b   |
| 3169  | 0.88 | $5.96 \times 10^{-1}$ | 0.56  | -4.62 | 0.28  | mmu-miR-672    |
| 8830  | 0.88 | $5.97 \times 10^{-1}$ | 0.56  | -4.62 | 0.16  | mmu-miR-345-5p |
| 13149 | 0.88 | $5.98 \times 10^{-1}$ | -0.56 | -4.62 | -0.45 | mmu-miR-298    |
| 9388  | 0.88 | $5.98 \times 10^{-1}$ | 0.56  | -4.62 | 0.15  | mmu-let-7a     |
| 329   | 0.88 | $5.98 \times 10^{-1}$ | 0.56  | -4.62 | 0.15  |                |
| 1855  | 0.88 | $5.99 \times 10^{-1}$ | 0.56  | -4.62 | 0.18  | mmu-let-7c     |
| 12380 | 0.88 | $5.99 \times 10^{-1}$ | 0.56  | -4.62 | 0.13  | mmu-miR-24     |
| 1684  | 0.88 | $5.99 \times 10^{-1}$ | -0.56 | -4.62 | -0.16 | mmu-miR-301a   |
| 14792 | 0.88 | $5.99 \times 10^{-1}$ | 0.56  | -4.62 | 0.20  | mmu-miR-26b    |
| 14746 | 0.88 | $6.00 \times 10^{-1}$ | 0.55  | -4.62 | 0.71  | mmu-miR-302a   |
| 6212  | 0.88 | $6.01 \times 10^{-1}$ | 0.55  | -4.62 | 0.37  | mmu-let-7b*    |
| 4324  | 0.88 | $6.01 \times 10^{-1}$ | 0.55  | -4.62 | 0.22  | mmu-miR-196b   |
| 9461  | 0.88 | $6.03 \times 10^{-1}$ | 0.55  | -4.62 | 0.14  | mmu-let-7i     |
| 7343  | 0.88 | $6.03 \times 10^{-1}$ | 0.55  | -4.62 | 1.22  | mmu-miR-448    |
| 12002 | 0.88 | $6.04 \times 10^{-1}$ | 0.55  | -4.62 | 0.13  | mmu-miR-24     |
| 1380  | 0.88 | $6.04 \times 10^{-1}$ | -0.55 | -4.62 | -0.36 | mmu-miR-128    |
| 4582  | 0.88 | $6.04 \times 10^{-1}$ | 0.55  | -4.62 | 0.57  | mmu-miR-452    |
| 2503  | 0.88 | $6.04 \times 10^{-1}$ | 0.55  | -4.62 | 0.15  | mmu-miR-24     |
| 11197 | 0.88 | $6.05 \times 10^{-1}$ | 0.55  | -4.62 | 0.19  |                |
| 483   | 0.88 | $6.05 \times 10^{-1}$ | 0.55  | -4.62 | 0.18  | mmu-miR-151-5p |
| 7609  | 0.88 | $6.05 \times 10^{-1}$ | 0.55  | -4.62 | 0.18  | mmu-miR-183    |
| 11069 | 0.88 | $6.05 \times 10^{-1}$ | 0.55  | -4.62 | 0.49  | mmu-miR-20b    |
| 13390 | 0.88 | $6.06 \times 10^{-1}$ | -0.55 | -4.62 | -0.24 | mmu-miR-98     |
| 15278 | 0.88 | $6.06 \times 10^{-1}$ | 0.55  | -4.62 | 0.21  | mmu-miR-10b    |
| 11397 | 0.88 | $6.07 \times 10^{-1}$ | -0.54 | -4.62 | -0.22 | mmu-let-7d     |
| 14397 | 0.88 | $6.07 \times 10^{-1}$ | 0.54  | -4.62 | 0.37  | mmu-miR-192    |
| 14118 | 0.88 | $6.07 \times 10^{-1}$ | -0.54 | -4.62 | -0.14 | mmu-miR-361    |
| 1522  | 0.88 | $6.07 \times 10^{-1}$ | 0.54  | -4.62 | 0.56  | mmu-miR-1904   |
| 11271 | 0.88 | $6.07 \times 10^{-1}$ | -0.54 | -4.62 | -0.22 | mmu-miR-30a*   |
| 10173 | 0.89 | $6.08 \times 10^{-1}$ | 0.54  | -4.62 | 0.39  | mmu-miR-31*    |
| 1563  | 0.89 | $6.09 \times 10^{-1}$ | -0.54 | -4.62 | -0.42 | mmu-miR-190    |
| 2225  | 0.89 | $6.09 \times 10^{-1}$ | -0.54 | -4.62 | -0.15 | mmu-let-7d     |
| 339   | 0.89 | $6.09 \times 10^{-1}$ | 0.54  | -4.62 | 0.30  | mmu-miR-296-5p |
| 4766  | 0.89 | $6.11 \times 10^{-1}$ | 0.54  | -4.62 | 0.90  |                |
| 3927  | 0.89 | $6.14 \times 10^{-1}$ | -0.53 | -4.62 | -0.31 | mmu-miR-30b    |
| 4914  | 0.89 | $6.14 \times 10^{-1}$ | -0.53 | -4.62 | -0.16 | mmu-miR-98     |
| 14290 | 0.89 | $6.16 \times 10^{-1}$ | 0.53  | -4.62 | 0.13  |                |
| 6601  | 0.89 | $6.16 \times 10^{-1}$ | 0.53  | -4.62 | 0.25  | mmu-miR-743a   |

|       |      |                       |       |       |       |                |
|-------|------|-----------------------|-------|-------|-------|----------------|
| 14691 | 0.89 | $6.16 \times 10^{-1}$ | -0.53 | -4.62 | -0.29 | mmu-miR-30b*   |
| 1280  | 0.89 | $6.16 \times 10^{-1}$ | -0.53 | -4.62 | -0.47 | mmu-miR-467e   |
| 11637 | 0.89 | $6.16 \times 10^{-1}$ | 0.53  | -4.62 | 0.35  | mmu-miR-196a   |
| 12770 | 0.89 | $6.17 \times 10^{-1}$ | 0.53  | -4.62 | 0.20  | mmu-miR-542-5p |
| 11235 | 0.89 | $6.17 \times 10^{-1}$ | 0.53  | -4.62 | 0.57  | mmu-miR-1904   |
| 3434  | 0.89 | $6.17 \times 10^{-1}$ | 0.53  | -4.62 | 0.83  | mmu-miR-148a   |
| 2827  | 0.89 | $6.18 \times 10^{-1}$ | -0.53 | -4.62 | -0.30 | mmu-miR-27b    |
| 3403  | 0.89 | $6.18 \times 10^{-1}$ | -0.53 | -4.62 | -0.18 | mmu-miR-26b    |
| 13138 | 0.89 | $6.18 \times 10^{-1}$ | 0.53  | -4.62 | 0.12  | mmu-miR-24     |
| 10952 | 0.89 | $6.20 \times 10^{-1}$ | -0.52 | -4.62 | -0.26 | mmu-miR-27b    |
| 5117  | 0.89 | $6.20 \times 10^{-1}$ | 0.52  | -4.62 | 0.60  | mmu-miR-715    |
| 8946  | 0.89 | $6.20 \times 10^{-1}$ | -0.52 | -4.62 | -0.29 | mmu-miR-7b     |
| 3048  | 0.89 | $6.21 \times 10^{-1}$ | 0.52  | -4.62 | 0.14  | mmu-let-7a     |
| 9485  | 0.89 | $6.21 \times 10^{-1}$ | 0.52  | -4.62 | 0.16  | mmu-miR-30d    |
| 5659  | 0.89 | $6.21 \times 10^{-1}$ | 0.52  | -4.62 | 0.13  | mmu-miR-10a    |
| 653   | 0.89 | $6.22 \times 10^{-1}$ | 0.52  | -4.62 | 0.42  | mmu-miR-1904   |
| 466   | 0.89 | $6.22 \times 10^{-1}$ | -0.52 | -4.62 | -0.13 | mmu-miR-107    |
| 11241 | 0.89 | $6.23 \times 10^{-1}$ | -0.52 | -4.62 | -0.71 | mmu-let-7b*    |
| 847   | 0.89 | $6.23 \times 10^{-1}$ | -0.52 | -4.62 | -0.35 | mmu-miR-302a   |
| 6456  | 0.89 | $6.23 \times 10^{-1}$ | -0.52 | -4.62 | -0.14 | mmu-miR-130a   |
| 8982  | 0.89 | $6.23 \times 10^{-1}$ | 0.52  | -4.62 | 0.12  | mmu-miR-24     |
| 7217  | 0.89 | $6.24 \times 10^{-1}$ | 0.52  | -4.62 | 0.12  | mmu-miR-342-3p |
| 15167 | 0.89 | $6.24 \times 10^{-1}$ | 0.52  | -4.62 | 0.15  | mmu-miR-98     |
| 10453 | 0.89 | $6.24 \times 10^{-1}$ | -0.52 | -4.62 | -0.34 | mmu-miR-146a   |
| 4973  | 0.89 | $6.25 \times 10^{-1}$ | -0.52 | -4.62 | -0.40 | mmu-miR-129-3p |
| 1176  | 0.90 | $6.26 \times 10^{-1}$ | -0.51 | -4.62 | -0.13 | mmu-miR-107    |
| 1016  | 0.90 | $6.26 \times 10^{-1}$ | 0.51  | -4.62 | 0.56  | mmu-miR-302a   |
| 7364  | 0.90 | $6.27 \times 10^{-1}$ | 0.51  | -4.62 | 0.21  | mmu-miR-296-5p |
| 6173  | 0.90 | $6.27 \times 10^{-1}$ | 0.51  | -4.62 | 0.59  | mmu-miR-877*   |
| 898   | 0.90 | $6.27 \times 10^{-1}$ | 0.51  | -4.62 | 0.13  | mmu-miR-361    |
| 6556  | 0.90 | $6.28 \times 10^{-1}$ | 0.51  | -4.62 | 0.17  | mmu-miR-331-3p |
| 13384 | 0.90 | $6.29 \times 10^{-1}$ | 0.51  | -4.62 | 0.13  | mmu-let-7i     |
| 15296 | 0.90 | $6.29 \times 10^{-1}$ | -0.51 | -4.62 | -0.62 | mmu-miR-30e*   |
| 11444 | 0.90 | $6.30 \times 10^{-1}$ | 0.51  | -4.62 | 0.56  | mmu-miR-669l   |
| 10505 | 0.90 | $6.30 \times 10^{-1}$ | -0.51 | -4.62 | -0.18 | mmu-miR-652    |
| 3629  | 0.90 | $6.30 \times 10^{-1}$ | 0.51  | -4.62 | 0.59  | mmu-miR-31*    |
| 13562 | 0.90 | $6.30 \times 10^{-1}$ | 0.51  | -4.62 | 0.22  | mmu-miR-99b    |
| 13197 | 0.90 | $6.31 \times 10^{-1}$ | -0.51 | -4.62 | -0.18 | mmu-let-7f     |
| 5049  | 0.90 | $6.32 \times 10^{-1}$ | -0.51 | -4.62 | -0.13 | mmu-miR-130a   |
| 6195  | 0.90 | $6.32 \times 10^{-1}$ | -0.51 | -4.62 | -0.32 |                |
| 340   | 0.90 | $6.32 \times 10^{-1}$ | -0.51 | -4.62 | -0.14 | mmu-miR-350    |
| 6766  | 0.90 | $6.32 \times 10^{-1}$ | 0.51  | -4.62 | 0.20  | mmu-miR-196a   |
| 7395  | 0.90 | $6.32 \times 10^{-1}$ | 0.51  | -4.62 | 0.15  | mmu-miR-674*   |
| 2983  | 0.90 | $6.32 \times 10^{-1}$ | -0.50 | -4.62 | -0.15 | mmu-let-7d     |
| 6462  | 0.90 | $6.33 \times 10^{-1}$ | 0.50  | -4.62 | 0.15  | mmu-let-7b     |
| 4850  | 0.90 | $6.33 \times 10^{-1}$ | 0.50  | -4.62 | 0.12  | mmu-let-7i     |

|       |      |                       |       |       |       |                |
|-------|------|-----------------------|-------|-------|-------|----------------|
| 4353  | 0.90 | $6.33 \times 10^{-1}$ | 0.50  | -4.62 | 0.14  | mmu-let-7a     |
| 3856  | 0.90 | $6.34 \times 10^{-1}$ | 0.50  | -4.62 | 0.20  | mmu-miR-30d    |
| 8480  | 0.90 | $6.34 \times 10^{-1}$ | 0.50  | -4.62 | 0.85  | mmu-miR-715    |
| 15578 | 0.90 | $6.34 \times 10^{-1}$ | -0.50 | -4.62 | -0.34 |                |
| 11577 | 0.90 | $6.34 \times 10^{-1}$ | 0.50  | -4.62 | 0.26  | mmu-miR-361    |
| 6925  | 0.90 | $6.34 \times 10^{-1}$ | -0.50 | -4.62 | -0.36 | mmu-miR-451    |
| 11249 | 0.90 | $6.35 \times 10^{-1}$ | -0.50 | -4.62 | -0.15 | mmu-let-7d     |
| 12315 | 0.90 | $6.35 \times 10^{-1}$ | 0.50  | -4.62 | 0.24  | mmu-miR-497    |
| 1138  | 0.90 | $6.35 \times 10^{-1}$ | 0.50  | -4.62 | 0.36  | mmu-miR-193    |
| 3098  | 0.90 | $6.36 \times 10^{-1}$ | -0.50 | -4.62 | -0.15 | mmu-miR-26a    |
| 9497  | 0.90 | $6.36 \times 10^{-1}$ | 0.50  | -4.62 | 0.21  | mmu-miR-26b    |
| 1139  | 0.90 | $6.36 \times 10^{-1}$ | 0.50  | -4.62 | 0.13  | mmu-miR-149    |
| 4169  | 0.90 | $6.36 \times 10^{-1}$ | 0.50  | -4.62 | 0.14  |                |
| 5631  | 0.90 | $6.36 \times 10^{-1}$ | 0.50  | -4.62 | 0.14  | mmu-miR-31*    |
| 3485  | 0.90 | $6.37 \times 10^{-1}$ | 0.50  | -4.62 | 0.12  |                |
| 9371  | 0.90 | $6.37 \times 10^{-1}$ | -0.50 | -4.62 | -0.50 | mmu-miR-697    |
| 11997 | 0.90 | $6.38 \times 10^{-1}$ | 0.50  | -4.62 | 0.38  | mmu-miR-146a   |
| 14087 | 0.90 | $6.38 \times 10^{-1}$ | 0.50  | -4.62 | 0.17  | mmu-let-7a     |
| 15728 | 0.90 | $6.38 \times 10^{-1}$ | -0.50 | -4.62 | -0.17 | mmu-miR-500    |
| 4248  | 0.90 | $6.39 \times 10^{-1}$ | 0.50  | -4.62 | 0.18  | mmu-miR-183    |
| 2043  | 0.90 | $6.39 \times 10^{-1}$ | 0.49  | -4.62 | 0.15  | mmu-miR-103    |
| 13052 | 0.90 | $6.40 \times 10^{-1}$ | 0.49  | -4.62 | 0.46  | mmu-miR-590-3p |
| 3066  | 0.90 | $6.41 \times 10^{-1}$ | -0.49 | -4.62 | -0.23 | mmu-miR-223    |
| 8865  | 0.90 | $6.41 \times 10^{-1}$ | 0.49  | -4.62 | 0.70  | mmu-miR-221    |
| 9163  | 0.90 | $6.42 \times 10^{-1}$ | 0.49  | -4.62 | 0.17  | mmu-miR-15b    |
| 9765  | 0.90 | $6.43 \times 10^{-1}$ | -0.49 | -4.62 | -0.68 | mmu-miR-365    |
| 8507  | 0.90 | $6.43 \times 10^{-1}$ | -0.49 | -4.62 | -0.26 | mmu-miR-702    |
| 3236  | 0.90 | $6.43 \times 10^{-1}$ | 0.49  | -4.62 | 0.15  | mmu-miR-221    |
| 8044  | 0.90 | $6.43 \times 10^{-1}$ | -0.49 | -4.62 | -0.55 | mmu-miR-30c    |
| 11081 | 0.90 | $6.44 \times 10^{-1}$ | 0.49  | -4.62 | 0.41  | mmu-miR-190    |
| 14343 | 0.90 | $6.44 \times 10^{-1}$ | -0.49 | -4.62 | -0.14 | mmu-miR-191*   |
| 12273 | 0.90 | $6.45 \times 10^{-1}$ | 0.49  | -4.62 | 0.14  |                |
| 823   | 0.90 | $6.45 \times 10^{-1}$ | 0.49  | -4.62 | 0.18  | mmu-miR-149    |
| 13773 | 0.90 | $6.46 \times 10^{-1}$ | 0.48  | -4.62 | 0.12  |                |
| 14477 | 0.90 | $6.46 \times 10^{-1}$ | -0.48 | -4.62 | -0.12 | mmu-let-7g     |
| 10247 | 0.90 | $6.47 \times 10^{-1}$ | -0.48 | -4.62 | -0.14 | mmu-miR-130a   |
| 8440  | 0.90 | $6.48 \times 10^{-1}$ | -0.48 | -4.62 | -0.13 | mmu-miR-130a   |
| 6633  | 0.90 | $6.49 \times 10^{-1}$ | 0.48  | -4.62 | 0.17  | mmu-miR-15b    |
| 15076 | 0.90 | $6.50 \times 10^{-1}$ | -0.48 | -4.62 | -0.12 | mmu-miR-324-5p |
| 14156 | 0.90 | $6.51 \times 10^{-1}$ | 0.48  | -4.62 | 0.20  |                |
| 5056  | 0.90 | $6.51 \times 10^{-1}$ | -0.48 | -4.62 | -0.57 | mmu-miR-135b   |
| 9695  | 0.90 | $6.52 \times 10^{-1}$ | 0.48  | -4.62 | 0.13  |                |
| 12657 | 0.90 | $6.52 \times 10^{-1}$ | 0.48  | -4.62 | 0.69  | mmu-miR-1187   |
| 8906  | 0.90 | $6.52 \times 10^{-1}$ | -0.47 | -4.62 | -0.11 | mmu-miR-15a    |
| 11092 | 0.90 | $6.53 \times 10^{-1}$ | 0.47  | -4.62 | 0.22  | mmu-miR-30b*   |
| 14622 | 0.90 | $6.53 \times 10^{-1}$ | 0.47  | -4.62 | 0.27  | mmu-miR-191*   |

|       |      |                       |       |       |       |                 |
|-------|------|-----------------------|-------|-------|-------|-----------------|
| 7060  | 0.90 | $6.53 \times 10^{-1}$ | 0.47  | -4.62 | 0.27  | mmu-miR-27a     |
| 8720  | 0.90 | $6.53 \times 10^{-1}$ | -0.47 | -4.62 | -0.34 | mmu-miR-30b     |
| 798   | 0.90 | $6.54 \times 10^{-1}$ | 0.47  | -4.62 | 0.11  | mmu-miR-196b    |
| 14485 | 0.90 | $6.54 \times 10^{-1}$ | 0.47  | -4.62 | 0.20  | mmu-miR-497     |
| 10727 | 0.90 | $6.55 \times 10^{-1}$ | -0.47 | -4.62 | -0.36 | mmu-miR-697     |
| 5035  | 0.90 | $6.55 \times 10^{-1}$ | -0.47 | -4.62 | -0.12 | mmu-miR-130a    |
| 4400  | 0.90 | $6.55 \times 10^{-1}$ | 0.47  | -4.62 | 0.14  | mmu-miR-500     |
| 13941 | 0.90 | $6.55 \times 10^{-1}$ | 0.47  | -4.62 | 0.11  | mmu-miR-345-5p  |
| 8156  | 0.90 | $6.56 \times 10^{-1}$ | -0.47 | -4.62 | -0.13 | mmu-miR-130a    |
| 11610 | 0.90 | $6.56 \times 10^{-1}$ | 0.47  | -4.62 | 0.32  | mmu-miR-191*    |
| 9754  | 0.90 | $6.56 \times 10^{-1}$ | -0.47 | -4.62 | -0.85 | mmu-miR-669h-5p |
| 9204  | 0.90 | $6.56 \times 10^{-1}$ | 0.47  | -4.62 | 0.14  | mmu-miR-210     |
| 469   | 0.90 | $6.56 \times 10^{-1}$ | -0.47 | -4.62 | -0.18 | mmu-miR-290-3p  |
| 12434 | 0.90 | $6.57 \times 10^{-1}$ | 0.47  | -4.62 | 0.19  | mmu-miR-532-5p  |
| 10983 | 0.90 | $6.57 \times 10^{-1}$ | 0.47  | -4.62 | 0.16  | mmu-miR-331-3p  |
| 7589  | 0.90 | $6.57 \times 10^{-1}$ | 0.47  | -4.62 | 0.15  | mmu-let-7a      |
| 12933 | 0.90 | $6.57 \times 10^{-1}$ | 0.47  | -4.62 | 0.25  | mmu-miR-18a     |
| 297   | 0.90 | $6.57 \times 10^{-1}$ | 0.47  | -4.62 | 0.11  |                 |
| 12386 | 0.90 | $6.58 \times 10^{-1}$ | 0.47  | -4.62 | 0.21  | mmu-miR-27a     |
| 2633  | 0.90 | $6.58 \times 10^{-1}$ | -0.47 | -4.62 | -0.23 | mmu-miR-98      |
| 2092  | 0.90 | $6.58 \times 10^{-1}$ | -0.47 | -4.62 | -0.49 | mmu-miR-297c    |
| 13724 | 0.90 | $6.59 \times 10^{-1}$ | 0.46  | -4.62 | 0.11  |                 |
| 8735  | 0.90 | $6.59 \times 10^{-1}$ | 0.46  | -4.62 | 0.13  | mmu-miR-98      |
| 557   | 0.90 | $6.61 \times 10^{-1}$ | 0.46  | -4.62 | 0.18  | mmu-miR-196a    |
| 14400 | 0.90 | $6.61 \times 10^{-1}$ | -0.46 | -4.62 | -0.40 | mmu-miR-674*    |
| 2197  | 0.90 | $6.61 \times 10^{-1}$ | -0.46 | -4.62 | -0.40 |                 |
| 11021 | 0.90 | $6.61 \times 10^{-1}$ | -0.46 | -4.62 | -0.14 | mmu-let-7f      |
| 443   | 0.90 | $6.61 \times 10^{-1}$ | 0.46  | -4.62 | 0.12  |                 |
| 12379 | 0.90 | $6.62 \times 10^{-1}$ | -0.46 | -4.62 | -0.55 | mmu-miR-7b      |
| 7443  | 0.90 | $6.62 \times 10^{-1}$ | 0.46  | -4.62 | 0.11  |                 |
| 8172  | 0.90 | $6.62 \times 10^{-1}$ | -0.46 | -4.62 | -0.39 | mmu-miR-202-3p  |
| 7533  | 0.90 | $6.62 \times 10^{-1}$ | 0.46  | -4.62 | 0.14  |                 |
| 14219 | 0.90 | $6.64 \times 10^{-1}$ | 0.46  | -4.62 | 0.14  | mmu-let-7a      |
| 13454 | 0.90 | $6.64 \times 10^{-1}$ | 0.46  | -4.62 | 0.13  | mmu-miR-322     |
| 2106  | 0.90 | $6.65 \times 10^{-1}$ | 0.46  | -4.62 | 0.16  | mmu-miR-196a    |
| 10633 | 0.90 | $6.65 \times 10^{-1}$ | 0.46  | -4.62 | 0.31  | mmu-miR-93      |
| 1634  | 0.90 | $6.66 \times 10^{-1}$ | -0.45 | -4.62 | -0.14 | mmu-let-7f      |
| 9736  | 0.90 | $6.66 \times 10^{-1}$ | -0.45 | -4.62 | -0.18 | mmu-miR-221     |
| 8053  | 0.90 | $6.66 \times 10^{-1}$ | 0.45  | -4.62 | 0.35  | mmu-miR-30a     |
| 1373  | 0.90 | $6.66 \times 10^{-1}$ | -0.45 | -4.62 | -0.34 | mmu-miR-290-3p  |
| 10296 | 0.90 | $6.66 \times 10^{-1}$ | -0.45 | -4.62 | -0.16 | mmu-miR-26b     |
| 6913  | 0.90 | $6.66 \times 10^{-1}$ | 0.45  | -4.62 | 0.33  |                 |
| 9816  | 0.90 | $6.66 \times 10^{-1}$ | 0.45  | -4.62 | 0.14  |                 |
| 13619 | 0.90 | $6.67 \times 10^{-1}$ | 0.45  | -4.62 | 0.57  | mmu-miR-10a*    |
| 7373  | 0.90 | $6.67 \times 10^{-1}$ | 0.45  | -4.62 | 0.11  | mmu-miR-196b    |
| 14363 | 0.90 | $6.67 \times 10^{-1}$ | -0.45 | -4.62 | -0.53 | mmu-miR-669n    |

|       |      |                       |       |       |       |                  |
|-------|------|-----------------------|-------|-------|-------|------------------|
| 3006  | 0.90 | 6.67x10 <sup>-1</sup> | 0.45  | -4.62 | 0.11  |                  |
| 15620 | 0.90 | 6.67x10 <sup>-1</sup> | -0.45 | -4.62 | -0.13 | mmu-miR-24       |
| 10612 | 0.90 | 6.68x10 <sup>-1</sup> | 0.45  | -4.62 | 0.13  |                  |
| 4492  | 0.90 | 6.68x10 <sup>-1</sup> | -0.45 | -4.62 | -0.13 | mmu-let-7f       |
| 9656  | 0.90 | 6.68x10 <sup>-1</sup> | -0.45 | -4.62 | -0.33 | mmu-miR-202-3p   |
| 12670 | 0.90 | 6.68x10 <sup>-1</sup> | -0.45 | -4.62 | -0.40 | mmu-miR-223      |
| 15722 | 0.90 | 6.69x10 <sup>-1</sup> | 0.45  | -4.62 | 0.66  | mmu-miR-202-3p   |
| 6121  | 0.90 | 6.69x10 <sup>-1</sup> | 0.45  | -4.62 | 0.22  | mmu-miR-192      |
| 8527  | 0.90 | 6.70x10 <sup>-1</sup> | -0.45 | -4.62 | -0.19 | mmu-miR-26a      |
| 3996  | 0.90 | 6.70x10 <sup>-1</sup> | -0.45 | -4.62 | -0.10 | mmu-miR-130b     |
| 3711  | 0.90 | 6.70x10 <sup>-1</sup> | 0.45  | -4.62 | 0.52  | mmu-miR-302a     |
| 9588  | 0.90 | 6.70x10 <sup>-1</sup> | -0.45 | -4.62 | -0.44 | mmu-miR-324-3p   |
| 8022  | 0.90 | 6.71x10 <sup>-1</sup> | 0.45  | -4.62 | 0.16  | mmu-miR-28       |
| 4754  | 0.90 | 6.71x10 <sup>-1</sup> | 0.45  | -4.62 | 0.11  | mmu-miR-23a      |
| 10351 | 0.90 | 6.72x10 <sup>-1</sup> | 0.45  | -4.62 | 0.77  | mmu-miR-697      |
| 11776 | 0.90 | 6.72x10 <sup>-1</sup> | 0.45  | -4.62 | 0.49  | mmu-miR-541      |
| 3600  | 0.90 | 6.73x10 <sup>-1</sup> | -0.44 | -4.62 | -0.11 | mmu-miR-652      |
| 14227 | 0.90 | 6.73x10 <sup>-1</sup> | -0.44 | -4.62 | -0.10 | mmu-miR-15a      |
| 2399  | 0.90 | 6.73x10 <sup>-1</sup> | -0.44 | -4.62 | -0.13 | mmu-miR-652      |
| 2363  | 0.91 | 6.74x10 <sup>-1</sup> | 0.44  | -4.62 | 0.13  |                  |
| 14947 | 0.91 | 6.75x10 <sup>-1</sup> | 0.44  | -4.62 | 0.12  | mmu-miR-331-3p   |
| 9473  | 0.91 | 6.76x10 <sup>-1</sup> | 0.44  | -4.62 | 0.61  | mmu-miR-190b     |
| 8924  | 0.91 | 6.77x10 <sup>-1</sup> | 0.44  | -4.62 | 0.30  | mmu-miR-28       |
| 12090 | 0.91 | 6.78x10 <sup>-1</sup> | -0.44 | -4.62 | -0.13 | mmu-let-7d       |
| 839   | 0.91 | 6.78x10 <sup>-1</sup> | 0.44  | -4.62 | 0.12  | mmu-let-7a       |
| 8506  | 0.91 | 6.78x10 <sup>-1</sup> | -0.44 | -4.62 | -0.11 | mmu-miR-342-3p   |
| 14032 | 0.91 | 6.78x10 <sup>-1</sup> | -0.44 | -4.62 | -0.10 | mmu-miR-324-5p   |
| 1792  | 0.91 | 6.80x10 <sup>-1</sup> | 0.43  | -4.62 | 0.14  | mmu-let-7a       |
| 6298  | 0.91 | 6.80x10 <sup>-1</sup> | 0.43  | -4.62 | 0.12  | mmu-miR-24       |
| 1388  | 0.91 | 6.81x10 <sup>-1</sup> | 0.43  | -4.62 | 0.28  | mmu-miR-503      |
| 4608  | 0.91 | 6.81x10 <sup>-1</sup> | -0.43 | -4.62 | -0.23 | mghv-miR-M1-7-3p |
| 1813  | 0.91 | 6.82x10 <sup>-1</sup> | -0.43 | -4.62 | -0.11 | mmu-miR-23b      |
| 9240  | 0.91 | 6.82x10 <sup>-1</sup> | 0.43  | -4.62 | 0.30  | mmu-miR-376b*    |
| 11767 | 0.91 | 6.82x10 <sup>-1</sup> | 0.43  | -4.62 | 0.46  | mmu-miR-126-5p   |
| 15135 | 0.91 | 6.82x10 <sup>-1</sup> | -0.43 | -4.62 | -0.49 | mmu-miR-199a-5p  |
| 1025  | 0.91 | 6.82x10 <sup>-1</sup> | 0.43  | -4.62 | 0.51  | mmu-miR-202-3p   |
| 14494 | 0.91 | 6.83x10 <sup>-1</sup> | -0.43 | -4.62 | -0.11 | mmu-let-7g       |
| 4759  | 0.91 | 6.83x10 <sup>-1</sup> | 0.43  | -4.62 | 0.11  | mmu-let-7i       |
| 9120  | 0.91 | 6.83x10 <sup>-1</sup> | 0.43  | -4.62 | 0.15  | mmu-miR-196a     |
| 14435 | 0.91 | 6.84x10 <sup>-1</sup> | -0.43 | -4.62 | -0.70 | mmu-miR-197      |
| 200   | 0.91 | 6.84x10 <sup>-1</sup> | 0.43  | -4.62 | 0.11  |                  |
| 11250 | 0.91 | 6.85x10 <sup>-1</sup> | 0.43  | -4.62 | 0.29  | mmu-miR-26b      |
| 8021  | 0.91 | 6.85x10 <sup>-1</sup> | -0.43 | -4.62 | -0.10 | mmu-miR-15a      |
| 4393  | 0.91 | 6.86x10 <sup>-1</sup> | -0.43 | -4.62 | -0.11 | mmu-miR-652      |
| 8950  | 0.91 | 6.86x10 <sup>-1</sup> | 0.42  | -4.62 | 0.26  |                  |
| 11578 | 0.91 | 6.86x10 <sup>-1</sup> | 0.42  | -4.62 | 0.41  | mmu-miR-23b      |

|       |      |                       |       |       |       |                |
|-------|------|-----------------------|-------|-------|-------|----------------|
| 13643 | 0.91 | $6.87 \times 10^{-1}$ | 0.42  | -4.62 | 0.12  | mmu-miR-322    |
| 3340  | 0.91 | $6.89 \times 10^{-1}$ | 0.42  | -4.62 | 0.42  | mmu-miR-374*   |
| 2607  | 0.91 | $6.89 \times 10^{-1}$ | 0.42  | -4.62 | 0.14  | mmu-let-7c     |
| 9595  | 0.91 | $6.89 \times 10^{-1}$ | -0.42 | -4.62 | -0.52 | mmu-miR-7a     |
| 3883  | 0.91 | $6.90 \times 10^{-1}$ | 0.42  | -4.62 | 0.46  | mmu-miR-202-3p |
| 10552 | 0.91 | $6.91 \times 10^{-1}$ | -0.42 | -4.62 | -0.47 | mmu-miR-298    |
| 4789  | 0.91 | $6.91 \times 10^{-1}$ | 0.42  | -4.62 | 0.56  | mmu-miR-697    |
| 6438  | 0.91 | $6.91 \times 10^{-1}$ | 0.42  | -4.62 | 0.18  | mmu-miR-425*   |
| 15682 | 0.91 | $6.93 \times 10^{-1}$ | -0.42 | -4.62 | -0.26 | mmu-miR-290-3p |
| 11469 | 0.91 | $6.93 \times 10^{-1}$ | -0.42 | -4.62 | -0.27 | mmu-miR-720    |
| 5726  | 0.91 | $6.93 \times 10^{-1}$ | 0.41  | -4.62 | 0.13  | mmu-miR-210    |
| 3433  | 0.91 | $6.93 \times 10^{-1}$ | -0.41 | -4.62 | -0.20 | mmu-miR-877*   |
| 7861  | 0.91 | $6.94 \times 10^{-1}$ | 0.41  | -4.62 | 0.13  | mmu-miR-23b    |
| 12132 | 0.92 | $6.95 \times 10^{-1}$ | -0.41 | -4.62 | -0.31 | mghv-miR-M1-2  |
| 3347  | 0.92 | $6.95 \times 10^{-1}$ | 0.41  | -4.62 | 0.54  | mmu-miR-148b   |
| 13379 | 0.92 | $6.95 \times 10^{-1}$ | -0.41 | -4.62 | -0.33 | mmu-miR-191*   |
| 3052  | 0.92 | $6.95 \times 10^{-1}$ | 0.41  | -4.62 | 0.41  |                |
| 2760  | 0.92 | $6.97 \times 10^{-1}$ | -0.41 | -4.62 | -0.18 | mmu-miR-140*   |
| 10029 | 0.92 | $6.97 \times 10^{-1}$ | -0.41 | -4.62 | -0.11 | mmu-miR-155    |
| 2038  | 0.92 | $6.97 \times 10^{-1}$ | 0.41  | -4.62 | 0.25  | mmu-miR-1904   |
| 4649  | 0.92 | $6.98 \times 10^{-1}$ | -0.41 | -4.62 | -0.12 | mmu-let-7g     |
| 4926  | 0.92 | $6.99 \times 10^{-1}$ | 0.41  | -4.62 | 0.11  | mmu-miR-423-5p |
| 15452 | 0.92 | $6.99 \times 10^{-1}$ | -0.41 | -4.62 | -0.35 | mmu-miR-7a*    |
| 8586  | 0.92 | $6.99 \times 10^{-1}$ | -0.41 | -4.62 | -0.15 | mmu-let-7f*    |
| 1069  | 0.92 | $7.00 \times 10^{-1}$ | 0.41  | -4.62 | 0.19  | mmu-miR-26a    |
| 1361  | 0.92 | $7.00 \times 10^{-1}$ | 0.40  | -4.62 | 0.09  | mmu-miR-27a    |
| 773   | 0.92 | $7.00 \times 10^{-1}$ | 0.40  | -4.62 | 0.10  | mmu-miR-130b   |
| 12888 | 0.92 | $7.00 \times 10^{-1}$ | -0.40 | -4.62 | -0.19 | mmu-miR-877*   |
| 10579 | 0.92 | $7.00 \times 10^{-1}$ | 0.40  | -4.62 | 0.47  | mmu-miR-1904   |
| 10183 | 0.92 | $7.00 \times 10^{-1}$ | 0.40  | -4.62 | 0.51  | mmu-miR-1904   |
| 10951 | 0.92 | $7.02 \times 10^{-1}$ | -0.40 | -4.62 | -0.10 | mmu-miR-130a   |
| 6666  | 0.92 | $7.02 \times 10^{-1}$ | 0.40  | -4.62 | 0.14  | mmu-miR-26b    |
| 14255 | 0.92 | $7.02 \times 10^{-1}$ | 0.40  | -4.62 | 0.17  | mmu-miR-183    |
| 10322 | 0.92 | $7.03 \times 10^{-1}$ | 0.40  | -4.62 | 0.14  | mmu-miR-140    |
| 4402  | 0.92 | $7.04 \times 10^{-1}$ | 0.40  | -4.62 | 0.09  | mmu-miR-322    |
| 15152 | 0.92 | $7.05 \times 10^{-1}$ | 0.40  | -4.62 | 0.10  | mmu-miR-331-3p |
| 12925 | 0.92 | $7.05 \times 10^{-1}$ | 0.40  | -4.62 | 0.09  | mmu-miR-96     |
| 3508  | 0.92 | $7.06 \times 10^{-1}$ | 0.40  | -4.62 | 0.09  | mmu-miR-322    |
| 14246 | 0.92 | $7.06 \times 10^{-1}$ | 0.40  | -4.62 | 0.13  | mmu-miR-27b    |
| 6690  | 0.92 | $7.07 \times 10^{-1}$ | 0.39  | -4.62 | 0.15  | mmu-miR-296-5p |
| 22    | 0.92 | $7.07 \times 10^{-1}$ | 0.39  | -4.62 | 0.44  | mmu-miR-190    |
| 6630  | 0.92 | $7.08 \times 10^{-1}$ | 0.39  | -4.62 | 0.31  | mmu-miR-224    |
| 14385 | 0.92 | $7.08 \times 10^{-1}$ | -0.39 | -4.62 | -0.15 | mmu-miR-98     |
| 4497  | 0.92 | $7.09 \times 10^{-1}$ | 0.39  | -4.62 | 0.11  | mmu-let-7a     |
| 15015 | 0.92 | $7.09 \times 10^{-1}$ | 0.39  | -4.62 | 0.39  | mmu-miR-100    |
| 8099  | 0.92 | $7.09 \times 10^{-1}$ | 0.39  | -4.62 | 0.11  |                |

|       |      |                       |       |       |       |                 |
|-------|------|-----------------------|-------|-------|-------|-----------------|
| 965   | 0.92 | $7.09 \times 10^{-1}$ | 0.39  | -4.62 | 0.14  | mmu-miR-301a    |
| 1322  | 0.92 | $7.11 \times 10^{-1}$ | 0.39  | -4.62 | 0.19  | mmu-miR-100     |
| 11595 | 0.92 | $7.11 \times 10^{-1}$ | 0.39  | -4.62 | 0.12  | mmu-miR-361     |
| 5658  | 0.92 | $7.12 \times 10^{-1}$ | -0.39 | -4.62 | -0.25 | mmu-miR-483*    |
| 713   | 0.92 | $7.13 \times 10^{-1}$ | -0.39 | -4.62 | -0.37 | mmu-miR-7a      |
| 15662 | 0.92 | $7.13 \times 10^{-1}$ | -0.39 | -4.62 | -0.09 |                 |
| 10272 | 0.92 | $7.13 \times 10^{-1}$ | 0.39  | -4.62 | 0.10  | mmu-miR-331-3p  |
| 14937 | 0.92 | $7.14 \times 10^{-1}$ | -0.38 | -4.62 | -0.14 | mmu-let-7g      |
| 8672  | 0.92 | $7.15 \times 10^{-1}$ | -0.38 | -4.62 | -0.23 | mmu-miR-18a     |
| 6836  | 0.92 | $7.15 \times 10^{-1}$ | 0.38  | -4.62 | 0.28  | mmu-miR-27b     |
| 5978  | 0.93 | $7.16 \times 10^{-1}$ | -0.38 | -4.62 | -0.11 | mmu-miR-19a     |
| 7920  | 0.93 | $7.17 \times 10^{-1}$ | 0.38  | -4.62 | 0.24  | mmu-miR-7a      |
| 580   | 0.93 | $7.18 \times 10^{-1}$ | 0.38  | -4.62 | 0.16  | mmu-miR-872     |
| 12168 | 0.93 | $7.18 \times 10^{-1}$ | 0.38  | -4.62 | 0.09  | mmu-miR-15b     |
| 5507  | 0.93 | $7.19 \times 10^{-1}$ | -0.38 | -4.62 | -0.09 | mmu-miR-15a     |
| 2757  | 0.93 | $7.19 \times 10^{-1}$ | 0.38  | -4.62 | 0.12  | mmu-let-7c      |
| 8015  | 0.93 | $7.20 \times 10^{-1}$ | -0.38 | -4.62 | -0.23 | mmu-miR-320     |
| 11458 | 0.93 | $7.20 \times 10^{-1}$ | 0.38  | -4.62 | 0.63  | mmu-miR-135a*   |
| 7153  | 0.93 | $7.21 \times 10^{-1}$ | 0.38  | -4.62 | 0.27  | mmu-miR-7a      |
| 5202  | 0.93 | $7.21 \times 10^{-1}$ | 0.38  | -4.62 | 0.18  |                 |
| 5800  | 0.93 | $7.21 \times 10^{-1}$ | 0.37  | -4.62 | 0.09  | mmu-miR-27a     |
| 6874  | 0.93 | $7.22 \times 10^{-1}$ | 0.37  | -4.62 | 0.09  | mmu-miR-24      |
| 8682  | 0.93 | $7.23 \times 10^{-1}$ | -0.37 | -4.62 | -0.56 |                 |
| 4414  | 0.93 | $7.23 \times 10^{-1}$ | -0.37 | -4.62 | -0.11 | mmu-let-7f      |
| 9321  | 0.93 | $7.23 \times 10^{-1}$ | 0.37  | -4.62 | 0.11  | mmu-let-7a      |
| 11779 | 0.93 | $7.23 \times 10^{-1}$ | 0.37  | -4.62 | 0.10  | mmu-miR-361     |
| 9552  | 0.93 | $7.24 \times 10^{-1}$ | -0.37 | -4.62 | -0.17 | mmu-miR-26b     |
| 14188 | 0.93 | $7.24 \times 10^{-1}$ | 0.37  | -4.62 | 0.09  | mmu-miR-342-3p  |
| 2189  | 0.93 | $7.24 \times 10^{-1}$ | 0.37  | -4.62 | 0.10  | mghv-miR-M1-2   |
| 1463  | 0.93 | $7.24 \times 10^{-1}$ | 0.37  | -4.62 | 0.21  | mmu-miR-18a     |
| 11238 | 0.93 | $7.25 \times 10^{-1}$ | -0.37 | -4.62 | -1.02 | mmu-miR-99b     |
| 1962  | 0.93 | $7.25 \times 10^{-1}$ | -0.37 | -4.62 | -0.25 | mmu-miR-466c-5p |
| 8108  | 0.93 | $7.25 \times 10^{-1}$ | -0.37 | -4.62 | -0.20 | mmu-miR-130b    |
| 7801  | 0.93 | $7.25 \times 10^{-1}$ | 0.37  | -4.62 | 0.39  | mmu-miR-295     |
| 13060 | 0.93 | $7.25 \times 10^{-1}$ | 0.37  | -4.62 | 0.11  | mmu-miR-26a     |
| 3836  | 0.93 | $7.25 \times 10^{-1}$ | 0.37  | -4.62 | 0.12  | mmu-miR-26a     |
| 13172 | 0.93 | $7.26 \times 10^{-1}$ | 0.37  | -4.62 | 0.11  | mmu-miR-674*    |
| 6829  | 0.93 | $7.26 \times 10^{-1}$ | -0.37 | -4.62 | -0.17 | mmu-miR-142-3p  |
| 11395 | 0.93 | $7.26 \times 10^{-1}$ | 0.37  | -4.62 | 0.09  |                 |
| 14320 | 0.93 | $7.26 \times 10^{-1}$ | -0.37 | -4.62 | -0.09 | mmu-miR-130b    |
| 12667 | 0.93 | $7.26 \times 10^{-1}$ | -0.37 | -4.62 | -0.13 | mmu-miR-674*    |
| 3096  | 0.93 | $7.26 \times 10^{-1}$ | 0.37  | -4.62 | 0.14  | mmu-miR-210     |
| 10071 | 0.93 | $7.27 \times 10^{-1}$ | 0.37  | -4.62 | 0.12  | mmu-let-7a      |
| 12990 | 0.93 | $7.27 \times 10^{-1}$ | 0.37  | -4.62 | 0.35  | mmu-miR-1904    |
| 6942  | 0.93 | $7.28 \times 10^{-1}$ | -0.36 | -4.62 | -0.14 | mmu-miR-185     |
| 1549  | 0.93 | $7.29 \times 10^{-1}$ | 0.36  | -4.62 | 0.34  | mmu-miR-202-3p  |

|       |      |                       |       |       |       |                   |
|-------|------|-----------------------|-------|-------|-------|-------------------|
| 9737  | 0.93 | $7.29 \times 10^{-1}$ | -0.36 | -4.62 | -0.10 | mmu-miR-23b       |
| 4834  | 0.93 | $7.29 \times 10^{-1}$ | 0.36  | -4.62 | 0.25  | mmu-miR-378       |
| 11783 | 0.93 | $7.30 \times 10^{-1}$ | 0.36  | -4.62 | 0.35  | mmu-miR-202-3p    |
| 10118 | 0.93 | $7.30 \times 10^{-1}$ | 0.36  | -4.62 | 0.10  | mmu-miR-24        |
| 8993  | 0.93 | $7.30 \times 10^{-1}$ | 0.36  | -4.62 | 0.40  | mmu-miR-1904      |
| 3477  | 0.93 | $7.30 \times 10^{-1}$ | 0.36  | -4.62 | 0.11  |                   |
| 15438 | 0.93 | $7.30 \times 10^{-1}$ | 0.36  | -4.62 | 0.41  | mmu-miR-1187      |
| 9719  | 0.93 | $7.32 \times 10^{-1}$ | 0.36  | -4.62 | 0.29  | mmu-miR-126-5p    |
| 14676 | 0.93 | $7.33 \times 10^{-1}$ | 0.36  | -4.62 | 0.13  | mmu-let-7c        |
| 11728 | 0.93 | $7.33 \times 10^{-1}$ | 0.36  | -4.62 | 0.09  | mmu-let-7i        |
| 2627  | 0.93 | $7.33 \times 10^{-1}$ | 0.36  | -4.62 | 0.50  | mmu-let-7b*       |
| 7277  | 0.93 | $7.34 \times 10^{-1}$ | 0.36  | -4.62 | 0.10  | mmu-let-7i        |
| 11559 | 0.93 | $7.35 \times 10^{-1}$ | 0.36  | -4.62 | 0.09  | mmu-miR-96        |
| 9512  | 0.93 | $7.38 \times 10^{-1}$ | 0.35  | -4.62 | 0.26  | mmu-miR-135b      |
| 5642  | 0.93 | $7.39 \times 10^{-1}$ | 0.35  | -4.62 | 0.45  | mmu-miR-499       |
| 11387 | 0.93 | $7.39 \times 10^{-1}$ | -0.35 | -4.62 | -0.66 | mmu-miR-190b      |
| 2685  | 0.93 | $7.39 \times 10^{-1}$ | -0.35 | -4.62 | -0.08 |                   |
| 2980  | 0.93 | $7.39 \times 10^{-1}$ | 0.35  | -4.62 | 0.29  | mmu-miR-290-3p    |
| 12553 | 0.93 | $7.40 \times 10^{-1}$ | 0.35  | -4.62 | 0.14  | mmu-miR-96        |
| 14862 | 0.93 | $7.40 \times 10^{-1}$ | -0.35 | -4.62 | -0.10 | mmu-let-7f        |
| 6626  | 0.93 | $7.40 \times 10^{-1}$ | 0.35  | -4.62 | 0.10  | mmu-miR-342-3p    |
| 14265 | 0.93 | $7.40 \times 10^{-1}$ | 0.35  | -4.62 | 0.28  | mmu-miR-503       |
| 7523  | 0.93 | $7.41 \times 10^{-1}$ | -0.35 | -4.62 | -0.08 | mmu-miR-15a       |
| 1372  | 0.93 | $7.41 \times 10^{-1}$ | 0.35  | -4.62 | 0.23  | mmu-miR-221       |
| 12884 | 0.93 | $7.42 \times 10^{-1}$ | -0.35 | -4.62 | -0.16 | mmu-miR-23b       |
| 8617  | 0.93 | $7.42 \times 10^{-1}$ | 0.34  | -4.62 | 0.17  |                   |
| 430   | 0.93 | $7.43 \times 10^{-1}$ | -0.34 | -4.62 | -0.16 | mmu-miR-196b      |
| 583   | 0.93 | $7.43 \times 10^{-1}$ | 0.34  | -4.62 | 0.41  | mmu-miR-320       |
| 8490  | 0.93 | $7.43 \times 10^{-1}$ | 0.34  | -4.62 | 0.08  | mmu-miR-15b       |
| 14232 | 0.93 | $7.44 \times 10^{-1}$ | -0.34 | -4.62 | -0.15 | mmu-miR-290-3p    |
| 3804  | 0.93 | $7.44 \times 10^{-1}$ | 0.34  | -4.62 | 0.19  |                   |
| 1580  | 0.93 | $7.44 \times 10^{-1}$ | -0.34 | -4.62 | -0.19 | mmu-miR-148b      |
| 11120 | 0.93 | $7.45 \times 10^{-1}$ | -0.34 | -4.62 | -0.49 | mmu-miR-297c      |
| 14144 | 0.93 | $7.45 \times 10^{-1}$ | 0.34  | -4.62 | 0.09  | mmu-miR-103       |
| 14197 | 0.93 | $7.45 \times 10^{-1}$ | 0.34  | -4.62 | 0.47  | mmu-miR-1904      |
| 8718  | 0.93 | $7.45 \times 10^{-1}$ | 0.34  | -4.62 | 0.09  | mmu-let-7i        |
| 809   | 0.94 | $7.49 \times 10^{-1}$ | -0.34 | -4.62 | -0.07 | mmu-miR-15a       |
| 9564  | 0.94 | $7.50 \times 10^{-1}$ | 0.33  | -4.62 | 0.60  | mmu-miR-451       |
| 2481  | 0.94 | $7.50 \times 10^{-1}$ | 0.33  | -4.62 | 0.11  | mmu-miR-30b       |
| 8969  | 0.94 | $7.51 \times 10^{-1}$ | -0.33 | -4.62 | -0.11 | mmu-let-7d        |
| 12960 | 0.94 | $7.51 \times 10^{-1}$ | 0.33  | -4.62 | 0.23  |                   |
| 11191 | 0.94 | $7.51 \times 10^{-1}$ | 0.33  | -4.62 | 0.24  | mmu-miR-702       |
| 12207 | 0.94 | $7.51 \times 10^{-1}$ | 0.33  | -4.62 | 0.12  | mmu-miR-196a      |
| 8177  | 0.94 | $7.51 \times 10^{-1}$ | 0.33  | -4.62 | 0.43  | mcmv-miR-M23-1-5p |
| 11583 | 0.94 | $7.52 \times 10^{-1}$ | -0.33 | -4.62 | -0.21 | mmu-miR-192       |
| 12213 | 0.94 | $7.53 \times 10^{-1}$ | -0.33 | -4.62 | -0.33 | mmu-miR-503       |



|       |      |                       |       |       |       |                 |
|-------|------|-----------------------|-------|-------|-------|-----------------|
| 8002  | 0.94 | $7.53 \times 10^{-1}$ | 0.33  | -4.62 | 0.18  | mmu-miR-181d    |
| 2330  | 0.94 | $7.53 \times 10^{-1}$ | 0.33  | -4.62 | 0.09  | mmu-miR-342-3p  |
| 11002 | 0.94 | $7.53 \times 10^{-1}$ | 0.33  | -4.62 | 0.55  | mmu-miR-190     |
| 4901  | 0.94 | $7.54 \times 10^{-1}$ | 0.33  | -4.62 | 0.12  | mmu-miR-500     |
| 3849  | 0.94 | $7.54 \times 10^{-1}$ | 0.33  | -4.62 | 0.12  | mmu-miR-210     |
| 11100 | 0.94 | $7.54 \times 10^{-1}$ | -0.33 | -4.62 | -0.09 | mmu-miR-27b     |
| 9331  | 0.94 | $7.55 \times 10^{-1}$ | -0.33 | -4.62 | -0.60 | mmu-miR-337-3p  |
| 13124 | 0.94 | $7.57 \times 10^{-1}$ | 0.32  | -4.62 | 0.25  |                 |
| 15124 | 0.94 | $7.57 \times 10^{-1}$ | -0.32 | -4.62 | -0.47 | mmu-miR-19b     |
| 6498  | 0.94 | $7.58 \times 10^{-1}$ | -0.32 | -4.62 | -0.17 | mmu-miR-30a     |
| 11496 | 0.94 | $7.58 \times 10^{-1}$ | -0.32 | -4.62 | -0.10 | mmu-miR-15a     |
| 9245  | 0.94 | $7.59 \times 10^{-1}$ | -0.32 | -4.62 | -0.26 | mmu-miR-30c-2*  |
| 9867  | 0.94 | $7.59 \times 10^{-1}$ | 0.32  | -4.62 | 0.24  | mmu-miR-324-5p  |
| 10450 | 0.94 | $7.59 \times 10^{-1}$ | 0.32  | -4.62 | 0.29  | mmu-miR-142-3p  |
| 10541 | 0.94 | $7.59 \times 10^{-1}$ | 0.32  | -4.62 | 0.31  | mmu-miR-136*    |
| 9677  | 0.94 | $7.59 \times 10^{-1}$ | 0.32  | -4.62 | 0.32  | mmu-miR-222     |
| 1075  | 0.94 | $7.60 \times 10^{-1}$ | 0.32  | -4.62 | 0.10  | mmu-miR-345-5p  |
| 5500  | 0.94 | $7.60 \times 10^{-1}$ | 0.32  | -4.62 | 0.23  | mmu-miR-668     |
| 13958 | 0.94 | $7.61 \times 10^{-1}$ | -0.32 | -4.62 | -0.10 | mmu-let-7g      |
| 13804 | 0.94 | $7.61 \times 10^{-1}$ | 0.32  | -4.62 | 0.16  |                 |
| 13716 | 0.94 | $7.61 \times 10^{-1}$ | -0.32 | -4.62 | -0.33 | mmu-miR-190     |
| 2831  | 0.94 | $7.61 \times 10^{-1}$ | 0.32  | -4.62 | 0.54  | mmu-miR-574-5p  |
| 14842 | 0.94 | $7.62 \times 10^{-1}$ | 0.32  | -4.62 | 0.34  | mmu-miR-190     |
| 8183  | 0.94 | $7.62 \times 10^{-1}$ | -0.32 | -4.62 | -0.07 | mmu-miR-140     |
| 7712  | 0.94 | $7.62 \times 10^{-1}$ | -0.32 | -4.62 | -0.09 | mmu-let-7f      |
| 11659 | 0.94 | $7.62 \times 10^{-1}$ | -0.32 | -4.62 | -0.41 | mmu-miR-652     |
| 15490 | 0.94 | $7.62 \times 10^{-1}$ | -0.32 | -4.62 | -0.18 | mmu-miR-674*    |
| 446   | 0.94 | $7.63 \times 10^{-1}$ | 0.32  | -4.62 | 0.23  | mmu-miR-294     |
| 5788  | 0.94 | $7.63 \times 10^{-1}$ | -0.32 | -4.62 | -0.26 | mmu-miR-463*    |
| 12494 | 0.94 | $7.64 \times 10^{-1}$ | 0.31  | -4.62 | 0.48  | mmu-miR-18a*    |
| 973   | 0.94 | $7.65 \times 10^{-1}$ | 0.31  | -4.62 | 0.10  | mmu-let-7a      |
| 6342  | 0.94 | $7.66 \times 10^{-1}$ | 0.31  | -4.62 | 0.28  | mmu-miR-181d    |
| 15568 | 0.94 | $7.66 \times 10^{-1}$ | 0.31  | -4.62 | 0.10  | mmu-let-7e      |
| 7855  | 0.94 | $7.67 \times 10^{-1}$ | -0.31 | -4.62 | -0.21 | mmu-miR-290-3p  |
| 2018  | 0.94 | $7.67 \times 10^{-1}$ | -0.31 | -4.62 | -0.13 | mmu-miR-10b     |
| 10587 | 0.94 | $7.67 \times 10^{-1}$ | -0.31 | -4.62 | -0.07 | mmu-miR-15a     |
| 14404 | 0.94 | $7.69 \times 10^{-1}$ | 0.31  | -4.62 | 0.10  | mmu-miR-10a     |
| 2889  | 0.94 | $7.69 \times 10^{-1}$ | 0.31  | -4.62 | 0.20  | mmu-miR-191*    |
| 15067 | 0.94 | $7.69 \times 10^{-1}$ | -0.31 | -4.62 | -0.13 | mmu-let-7d      |
| 7939  | 0.94 | $7.71 \times 10^{-1}$ | 0.31  | -4.62 | 0.23  | mmu-miR-211     |
| 9948  | 0.94 | $7.71 \times 10^{-1}$ | -0.31 | -4.62 | -0.12 | mmu-miR-185     |
| 7820  | 0.94 | $7.71 \times 10^{-1}$ | -0.31 | -4.62 | -0.22 | mmu-miR-19a*    |
| 11149 | 0.94 | $7.71 \times 10^{-1}$ | 0.30  | -4.62 | 0.10  | mmu-miR-361     |
| 5522  | 0.94 | $7.71 \times 10^{-1}$ | 0.30  | -4.62 | 0.31  | mmu-miR-30c     |
| 12611 | 0.94 | $7.73 \times 10^{-1}$ | -0.30 | -4.62 | -0.30 | mmu-miR-465a-3p |
| 7665  | 0.94 | $7.73 \times 10^{-1}$ | 0.30  | -4.62 | 0.08  |                 |

|       |      |                       |       |       |       |                 |
|-------|------|-----------------------|-------|-------|-------|-----------------|
| 1030  | 0.95 | 7.74x10 <sup>-1</sup> | 0.30  | -4.62 | 0.31  | mmu-miR-697     |
| 12001 | 0.95 | 7.74x10 <sup>-1</sup> | 0.30  | -4.62 | 0.23  |                 |
| 3411  | 0.95 | 7.75x10 <sup>-1</sup> | -0.30 | -4.62 | -0.09 | mmu-miR-465a-3p |
| 12576 | 0.95 | 7.75x10 <sup>-1</sup> | 0.30  | -4.62 | 0.07  | mmu-miR-107     |
| 8994  | 0.95 | 7.75x10 <sup>-1</sup> | -0.30 | -4.62 | -0.08 | mmu-miR-130b    |
| 3762  | 0.95 | 7.76x10 <sup>-1</sup> | 0.30  | -4.62 | 0.13  | mmu-miR-29c     |
| 8951  | 0.95 | 7.77x10 <sup>-1</sup> | -0.30 | -4.62 | -0.20 | mmu-miR-30e*    |
| 2183  | 0.95 | 7.78x10 <sup>-1</sup> | -0.30 | -4.62 | -0.11 |                 |
| 10307 | 0.95 | 7.78x10 <sup>-1</sup> | 0.30  | -4.62 | 0.09  | mmu-miR-103     |
| 13520 | 0.95 | 7.78x10 <sup>-1</sup> | 0.30  | -4.62 | 0.08  | mmu-let-7i      |
| 100   | 0.95 | 7.80x10 <sup>-1</sup> | 0.29  | -4.62 | 0.40  | mmu-miR-92b     |
| 2214  | 0.95 | 7.80x10 <sup>-1</sup> | -0.29 | -4.62 | -0.30 | mghv-miR-M1-6   |
| 10896 | 0.95 | 7.81x10 <sup>-1</sup> | -0.29 | -4.62 | -0.15 | mmu-miR-28      |
| 9134  | 0.95 | 7.81x10 <sup>-1</sup> | -0.29 | -4.62 | -0.09 | mmu-miR-881     |
| 15399 | 0.95 | 7.81x10 <sup>-1</sup> | -0.29 | -4.62 | -0.18 | mmu-miR-669a    |
| 11975 | 0.95 | 7.81x10 <sup>-1</sup> | -0.29 | -4.62 | -0.20 | mmu-miR-30a*    |
| 4457  | 0.95 | 7.81x10 <sup>-1</sup> | 0.29  | -4.62 | 0.07  | mmu-miR-15b     |
| 3276  | 0.95 | 7.81x10 <sup>-1</sup> | 0.29  | -4.62 | 0.42  | mmu-miR-1895    |
| 5740  | 0.95 | 7.82x10 <sup>-1</sup> | 0.29  | -4.62 | 0.19  | mmu-miR-298     |
| 2063  | 0.95 | 7.82x10 <sup>-1</sup> | 0.29  | -4.62 | 0.09  |                 |
| 2282  | 0.95 | 7.83x10 <sup>-1</sup> | -0.29 | -4.62 | -0.07 | mmu-let-7g      |
| 10880 | 0.95 | 7.83x10 <sup>-1</sup> | 0.29  | -4.62 | 0.09  | mmu-miR-423-5p  |
| 10787 | 0.95 | 7.84x10 <sup>-1</sup> | 0.29  | -4.62 | 0.22  |                 |
| 1263  | 0.95 | 7.84x10 <sup>-1</sup> | 0.29  | -4.62 | 0.08  | mmu-miR-322     |
| 1457  | 0.95 | 7.84x10 <sup>-1</sup> | 0.29  | -4.62 | 0.35  | mmu-miR-466a-5p |
| 12607 | 0.95 | 7.85x10 <sup>-1</sup> | -0.29 | -4.62 | -0.09 | mmu-miR-17*     |
| 300   | 0.95 | 7.86x10 <sup>-1</sup> | 0.28  | -4.62 | 0.06  | mmu-miR-107     |
| 13293 | 0.95 | 7.87x10 <sup>-1</sup> | 0.28  | -4.62 | 0.09  | mmu-let-7d      |
| 6238  | 0.95 | 7.87x10 <sup>-1</sup> | 0.28  | -4.62 | 0.40  | mmu-miR-1892    |
| 11097 | 0.95 | 7.87x10 <sup>-1</sup> | 0.28  | -4.62 | 0.08  | mmu-miR-140     |
| 13082 | 0.95 | 7.88x10 <sup>-1</sup> | 0.28  | -4.62 | 0.08  | mmu-miR-107     |
| 3333  | 0.95 | 7.88x10 <sup>-1</sup> | -0.28 | -4.62 | -0.33 | mmu-miR-697     |
| 2057  | 0.95 | 7.88x10 <sup>-1</sup> | -0.28 | -4.62 | -0.10 | mmu-miR-130a    |
| 10632 | 0.95 | 7.88x10 <sup>-1</sup> | -0.28 | -4.62 | -0.26 | mmu-miR-129-3p  |
| 12754 | 0.95 | 7.89x10 <sup>-1</sup> | 0.28  | -4.62 | 0.07  | mmu-miR-10a     |
| 9087  | 0.95 | 7.89x10 <sup>-1</sup> | -0.28 | -4.62 | -0.08 | mmu-let-7f*     |
| 674   | 0.95 | 7.89x10 <sup>-1</sup> | 0.28  | -4.62 | 0.07  | mmu-miR-322     |
| 12134 | 0.95 | 7.89x10 <sup>-1</sup> | -0.28 | -4.62 | -0.42 | mmu-miR-484     |
| 9296  | 0.95 | 7.89x10 <sup>-1</sup> | 0.28  | -4.62 | 0.12  | mmu-miR-291b-5p |
| 3415  | 0.95 | 7.89x10 <sup>-1</sup> | -0.28 | -4.62 | -0.07 | mmu-miR-96      |
| 2975  | 0.95 | 7.90x10 <sup>-1</sup> | 0.28  | -4.62 | 0.08  | mmu-miR-423-5p  |
| 1062  | 0.95 | 7.91x10 <sup>-1</sup> | -0.28 | -4.62 | -0.15 | mmu-miR-542-5p  |
| 2618  | 0.95 | 7.91x10 <sup>-1</sup> | -0.28 | -4.62 | -0.18 | mmu-miR-720     |
| 12655 | 0.95 | 7.91x10 <sup>-1</sup> | -0.28 | -4.62 | -0.09 | mmu-miR-31*     |
| 10931 | 0.95 | 7.91x10 <sup>-1</sup> | 0.28  | -4.62 | 0.35  | mmu-miR-202-3p  |
| 5675  | 0.95 | 7.93x10 <sup>-1</sup> | -0.28 | -4.62 | -0.11 | mmu-miR-98      |

|       |      |                       |       |       |       |                   |
|-------|------|-----------------------|-------|-------|-------|-------------------|
| 11224 | 0.95 | $7.93 \times 10^{-1}$ | 0.28  | -4.62 | 0.08  | mmu-miR-196a      |
| 10290 | 0.95 | $7.93 \times 10^{-1}$ | -0.27 | -4.62 | -0.17 | mmu-miR-720       |
| 4293  | 0.95 | $7.94 \times 10^{-1}$ | 0.27  | -4.62 | 0.37  | mmu-miR-30c-1*    |
| 14826 | 0.95 | $7.95 \times 10^{-1}$ | 0.27  | -4.62 | 0.21  |                   |
| 3752  | 0.95 | $7.95 \times 10^{-1}$ | 0.27  | -4.62 | 0.22  | mmu-miR-135a      |
| 11691 | 0.95 | $7.95 \times 10^{-1}$ | -0.27 | -4.62 | -0.62 | mmu-miR-29b*      |
| 8683  | 0.95 | $7.95 \times 10^{-1}$ | 0.27  | -4.62 | 0.09  | mmu-miR-130b      |
| 4067  | 0.95 | $7.96 \times 10^{-1}$ | -0.27 | -4.62 | -0.18 | mmu-miR-503       |
| 8367  | 0.95 | $7.96 \times 10^{-1}$ | 0.27  | -4.62 | 0.31  |                   |
| 13159 | 0.95 | $7.97 \times 10^{-1}$ | -0.27 | -4.62 | -0.06 | mmu-miR-15a       |
| 10574 | 0.95 | $7.97 \times 10^{-1}$ | 0.27  | -4.62 | 0.12  | mmu-miR-103       |
| 12402 | 0.95 | $7.97 \times 10^{-1}$ | -0.27 | -4.62 | -0.18 | mmu-miR-720       |
| 10725 | 0.95 | $7.97 \times 10^{-1}$ | 0.27  | -4.62 | 0.14  | mmu-miR-449a      |
| 4327  | 0.95 | $7.97 \times 10^{-1}$ | 0.27  | -4.62 | 0.29  | mmu-miR-1904      |
| 5303  | 0.95 | $7.98 \times 10^{-1}$ | 0.27  | -4.62 | 0.07  | mmu-miR-24        |
| 11051 | 0.95 | $7.98 \times 10^{-1}$ | -0.27 | -4.62 | -0.21 | mmu-miR-195       |
| 10545 | 0.95 | $7.99 \times 10^{-1}$ | -0.27 | -4.62 | -0.23 | mmu-miR-191*      |
| 12116 | 0.95 | $7.99 \times 10^{-1}$ | -0.27 | -4.62 | -0.08 | mmu-miR-23b       |
| 12969 | 0.95 | $8.00 \times 10^{-1}$ | -0.27 | -4.62 | -0.10 | mmu-miR-30e       |
| 14571 | 0.95 | $8.00 \times 10^{-1}$ | -0.27 | -4.62 | -0.07 | mmu-miR-26a       |
| 4741  | 0.95 | $8.00 \times 10^{-1}$ | -0.27 | -4.62 | -0.17 | mmu-miR-720       |
| 6050  | 0.95 | $8.00 \times 10^{-1}$ | 0.26  | -4.62 | 0.11  |                   |
| 12099 | 0.95 | $8.02 \times 10^{-1}$ | -0.26 | -4.62 | -0.10 | mmu-miR-425       |
| 3530  | 0.95 | $8.03 \times 10^{-1}$ | -0.26 | -4.62 | -0.16 | mmu-miR-342-3p    |
| 11357 | 0.95 | $8.03 \times 10^{-1}$ | -0.26 | -4.62 | -0.35 | mmu-miR-483*      |
| 1585  | 0.95 | $8.03 \times 10^{-1}$ | 0.26  | -4.62 | 0.20  | mmu-miR-296-5p    |
| 2068  | 0.95 | $8.04 \times 10^{-1}$ | 0.26  | -4.62 | 0.14  | mg hv-miR-M1-2    |
| 4723  | 0.95 | $8.06 \times 10^{-1}$ | 0.26  | -4.62 | 0.13  | mmu-let-7f*       |
| 4391  | 0.95 | $8.06 \times 10^{-1}$ | -0.26 | -4.63 | -0.19 | mmu-miR-340-3p    |
| 10728 | 0.95 | $8.06 \times 10^{-1}$ | -0.26 | -4.63 | -0.06 | mmu-let-7g        |
| 1505  | 0.95 | $8.07 \times 10^{-1}$ | 0.26  | -4.63 | 0.07  | mmu-miR-196b      |
| 4928  | 0.95 | $8.07 \times 10^{-1}$ | 0.26  | -4.63 | 0.31  |                   |
| 5307  | 0.95 | $8.07 \times 10^{-1}$ | 0.26  | -4.63 | 0.07  | mmu-miR-103       |
| 2444  | 0.95 | $8.08 \times 10^{-1}$ | 0.25  | -4.63 | 0.13  | mmu-miR-702       |
| 3312  | 0.95 | $8.09 \times 10^{-1}$ | 0.25  | -4.63 | 0.10  |                   |
| 10862 | 0.95 | $8.09 \times 10^{-1}$ | 0.25  | -4.63 | 0.06  | mmu-miR-26a       |
| 10621 | 0.95 | $8.09 \times 10^{-1}$ | -0.25 | -4.63 | -0.34 | mg hv-miR-M1-7-3p |
| 12503 | 0.95 | $8.10 \times 10^{-1}$ | -0.25 | -4.63 | -0.34 | mmu-miR-468       |
| 14721 | 0.95 | $8.10 \times 10^{-1}$ | 0.25  | -4.63 | 0.29  | mmu-miR-1904      |
| 1502  | 0.95 | $8.10 \times 10^{-1}$ | -0.25 | -4.63 | -0.18 | mmu-miR-495       |
| 3405  | 0.95 | $8.10 \times 10^{-1}$ | 0.25  | -4.63 | 0.29  | mmu-miR-1904      |
| 8268  | 0.95 | $8.10 \times 10^{-1}$ | 0.25  | -4.63 | 0.14  | mmu-miR-125a-3p   |
| 10791 | 0.95 | $8.11 \times 10^{-1}$ | -0.25 | -4.63 | -0.07 |                   |
| 4921  | 0.95 | $8.11 \times 10^{-1}$ | 0.25  | -4.63 | 0.27  | mmu-miR-1904      |
| 1204  | 0.95 | $8.12 \times 10^{-1}$ | 0.25  | -4.63 | 0.13  | mmu-let-7f*       |
| 4597  | 0.95 | $8.12 \times 10^{-1}$ | 0.25  | -4.63 | 0.18  | mmu-miR-872       |

|       |      |                       |       |       |       |                   |
|-------|------|-----------------------|-------|-------|-------|-------------------|
| 8979  | 0.95 | $8.12 \times 10^{-1}$ | -0.25 | -4.63 | -0.08 | mmu-miR-10a       |
| 1989  | 0.95 | $8.12 \times 10^{-1}$ | 0.25  | -4.63 | 0.06  | mmu-miR-342-3p    |
| 9027  | 0.95 | $8.13 \times 10^{-1}$ | 0.25  | -4.63 | 0.11  |                   |
| 11822 | 0.96 | $8.14 \times 10^{-1}$ | -0.25 | -4.63 | -0.06 | mmu-miR-26b       |
| 2812  | 0.96 | $8.15 \times 10^{-1}$ | 0.25  | -4.63 | 0.15  |                   |
| 2800  | 0.96 | $8.15 \times 10^{-1}$ | -0.25 | -4.63 | -0.13 | mmu-miR-27b       |
| 7699  | 0.96 | $8.17 \times 10^{-1}$ | 0.24  | -4.63 | 0.15  | mmu-miR-192       |
| 2160  | 0.96 | $8.17 \times 10^{-1}$ | -0.24 | -4.63 | -0.16 | mmu-miR-135b      |
| 10513 | 0.96 | $8.17 \times 10^{-1}$ | 0.24  | -4.63 | 0.26  | mmu-miR-30c       |
| 3930  | 0.96 | $8.18 \times 10^{-1}$ | 0.24  | -4.63 | 0.28  | mmu-miR-1904      |
| 3716  | 0.96 | $8.18 \times 10^{-1}$ | -0.24 | -4.63 | -0.08 | mmu-miR-500       |
| 14179 | 0.96 | $8.19 \times 10^{-1}$ | -0.24 | -4.63 | -0.07 | mmu-miR-497       |
| 10054 | 0.96 | $8.19 \times 10^{-1}$ | -0.24 | -4.63 | -0.11 | mmu-miR-193       |
| 894   | 0.96 | $8.19 \times 10^{-1}$ | 0.24  | -4.63 | 0.07  | mmu-miR-322       |
| 15250 | 0.96 | $8.20 \times 10^{-1}$ | -0.24 | -4.63 | -0.09 | mmu-miR-674*      |
| 2111  | 0.96 | $8.21 \times 10^{-1}$ | 0.24  | -4.63 | 0.13  | mmu-miR-23b       |
| 3109  | 0.96 | $8.21 \times 10^{-1}$ | 0.24  | -4.63 | 0.31  | mmu-miR-542-5p    |
| 8427  | 0.96 | $8.21 \times 10^{-1}$ | 0.24  | -4.63 | 0.07  | mmu-miR-10a       |
| 3316  | 0.96 | $8.22 \times 10^{-1}$ | -0.23 | -4.63 | -0.44 | mmu-miR-135a      |
| 1771  | 0.96 | $8.23 \times 10^{-1}$ | 0.23  | -4.63 | 0.20  | mmu-miR-193b      |
| 8369  | 0.96 | $8.24 \times 10^{-1}$ | 0.23  | -4.63 | 0.06  | mmu-miR-107       |
| 173   | 0.96 | $8.25 \times 10^{-1}$ | 0.23  | -4.63 | 0.28  | mmu-miR-1904      |
| 2906  | 0.96 | $8.25 \times 10^{-1}$ | 0.23  | -4.63 | 0.35  | mmu-miR-700       |
| 9625  | 0.96 | $8.26 \times 10^{-1}$ | 0.23  | -4.63 | 0.06  | mmu-miR-107       |
| 15657 | 0.96 | $8.26 \times 10^{-1}$ | 0.23  | -4.63 | 0.27  | mmu-miR-139-3p    |
| 13316 | 0.96 | $8.26 \times 10^{-1}$ | 0.23  | -4.63 | 0.25  | mmu-miR-140       |
| 15639 | 0.96 | $8.26 \times 10^{-1}$ | -0.23 | -4.63 | -0.05 | mmu-miR-27a       |
| 10668 | 0.96 | $8.27 \times 10^{-1}$ | -0.23 | -4.63 | -0.26 | mmu-miR-223       |
| 2187  | 0.96 | $8.27 \times 10^{-1}$ | -0.23 | -4.63 | -0.07 | mmu-miR-10a       |
| 15687 | 0.96 | $8.28 \times 10^{-1}$ | -0.23 | -4.63 | -0.06 | mmu-miR-322       |
| 4565  | 0.96 | $8.28 \times 10^{-1}$ | -0.23 | -4.63 | -0.07 | mmu-miR-23b       |
| 10392 | 0.96 | $8.28 \times 10^{-1}$ | 0.23  | -4.63 | 0.15  | mmu-miR-7b        |
| 2401  | 0.96 | $8.30 \times 10^{-1}$ | 0.22  | -4.63 | 0.07  | mmu-miR-96        |
| 13360 | 0.96 | $8.30 \times 10^{-1}$ | 0.22  | -4.63 | 0.29  | mcmv-miR-M23-1-5p |
| 10833 | 0.96 | $8.30 \times 10^{-1}$ | 0.22  | -4.63 | 0.25  |                   |
| 2405  | 0.96 | $8.31 \times 10^{-1}$ | 0.22  | -4.63 | 0.50  | mmu-miR-139-3p    |
| 13428 | 0.96 | $8.31 \times 10^{-1}$ | 0.22  | -4.63 | 0.06  | mmu-miR-26a       |
| 1071  | 0.96 | $8.31 \times 10^{-1}$ | 0.22  | -4.63 | 0.45  | mmu-miR-139-3p    |
| 11091 | 0.96 | $8.31 \times 10^{-1}$ | -0.22 | -4.63 | -0.06 | mmu-miR-23b       |
| 12084 | 0.96 | $8.32 \times 10^{-1}$ | -0.22 | -4.63 | -0.25 | mmu-miR-721       |
| 4225  | 0.96 | $8.35 \times 10^{-1}$ | 0.22  | -4.63 | 0.10  | mmu-miR-26a       |
| 378   | 0.96 | $8.35 \times 10^{-1}$ | 0.22  | -4.63 | 0.09  | mghv-miR-M1-2     |
| 6650  | 0.96 | $8.35 \times 10^{-1}$ | 0.22  | -4.63 | 0.13  |                   |
| 5730  | 0.96 | $8.36 \times 10^{-1}$ | -0.22 | -4.63 | -0.13 | mmu-miR-149       |
| 7998  | 0.96 | $8.36 \times 10^{-1}$ | 0.22  | -4.63 | 0.15  |                   |
| 9179  | 0.96 | $8.36 \times 10^{-1}$ | 0.22  | -4.63 | 0.05  | mmu-miR-196b      |

|       |      |                       |       |       |       |                 |
|-------|------|-----------------------|-------|-------|-------|-----------------|
| 8998  | 0.96 | $8.36 \times 10^{-1}$ | -0.22 | -4.63 | -0.13 | mmu-miR-301a    |
| 4507  | 0.96 | $8.36 \times 10^{-1}$ | -0.22 | -4.63 | -0.11 | mmu-miR-298     |
| 10953 | 0.96 | $8.37 \times 10^{-1}$ | -0.22 | -4.63 | -0.19 | mmu-miR-291b-3p |
| 6957  | 0.96 | $8.38 \times 10^{-1}$ | 0.21  | -4.63 | 0.26  | mmu-miR-92b     |
| 6774  | 0.96 | $8.38 \times 10^{-1}$ | 0.21  | -4.63 | 0.05  | mmu-miR-130b    |
| 917   | 0.96 | $8.38 \times 10^{-1}$ | 0.21  | -4.63 | 0.11  | mmu-miR-465a-3p |
| 9937  | 0.97 | $8.39 \times 10^{-1}$ | -0.21 | -4.63 | -0.07 | mmu-miR-342-3p  |
| 11886 | 0.97 | $8.39 \times 10^{-1}$ | 0.21  | -4.63 | 0.36  | mmu-miR-186*    |
| 199   | 0.97 | $8.40 \times 10^{-1}$ | -0.21 | -4.63 | -0.05 | mmu-miR-96      |
| 13079 | 0.97 | $8.40 \times 10^{-1}$ | 0.21  | -4.63 | 0.06  | mmu-miR-96      |
| 10385 | 0.97 | $8.40 \times 10^{-1}$ | -0.21 | -4.63 | -0.05 | mmu-miR-425     |
| 2084  | 0.97 | $8.40 \times 10^{-1}$ | -0.21 | -4.63 | -0.07 | mmu-let-7g      |
| 9384  | 0.97 | $8.42 \times 10^{-1}$ | -0.21 | -4.63 | -0.22 | mmu-miR-148a    |
| 14876 | 0.97 | $8.43 \times 10^{-1}$ | 0.21  | -4.63 | 0.07  | mmu-miR-26a     |
| 8315  | 0.97 | $8.43 \times 10^{-1}$ | 0.21  | -4.63 | 0.06  | mmu-miR-674*    |
| 3425  | 0.97 | $8.43 \times 10^{-1}$ | -0.21 | -4.63 | -0.24 | mmu-miR-362-3p  |
| 10530 | 0.97 | $8.44 \times 10^{-1}$ | -0.21 | -4.63 | -0.08 | mmu-miR-98      |
| 4163  | 0.97 | $8.44 \times 10^{-1}$ | -0.21 | -4.63 | -0.05 |                 |
| 71    | 0.97 | $8.44 \times 10^{-1}$ | 0.21  | -4.63 | 0.13  | mmu-miR-425     |
| 1050  | 0.97 | $8.45 \times 10^{-1}$ | 0.20  | -4.63 | 0.06  |                 |
| 12389 | 0.97 | $8.45 \times 10^{-1}$ | 0.20  | -4.63 | 0.08  | mmu-miR-185     |
| 9655  | 0.97 | $8.46 \times 10^{-1}$ | -0.20 | -4.63 | -0.07 | mmu-miR-196b    |
| 14829 | 0.97 | $8.46 \times 10^{-1}$ | -0.20 | -4.63 | -0.05 | mmu-miR-15a     |
| 3311  | 0.97 | $8.46 \times 10^{-1}$ | 0.20  | -4.63 | 0.06  | mmu-miR-423-5p  |
| 9688  | 0.97 | $8.46 \times 10^{-1}$ | -0.20 | -4.63 | -0.12 | mmu-miR-96      |
| 15319 | 0.97 | $8.46 \times 10^{-1}$ | -0.20 | -4.63 | -0.09 | mmu-miR-193b    |
| 6130  | 0.97 | $8.47 \times 10^{-1}$ | -0.20 | -4.63 | -0.25 | mmu-miR-186*    |
| 5247  | 0.97 | $8.47 \times 10^{-1}$ | 0.20  | -4.63 | 0.08  | mmu-miR-183     |
| 9534  | 0.97 | $8.48 \times 10^{-1}$ | -0.20 | -4.63 | -0.11 | mmu-let-7f*     |
| 7462  | 0.97 | $8.48 \times 10^{-1}$ | 0.20  | -4.63 | 0.18  | mmu-miR-19a     |
| 12669 | 0.97 | $8.48 \times 10^{-1}$ | -0.20 | -4.63 | -0.06 | mmu-let-7d      |
| 14078 | 0.97 | $8.48 \times 10^{-1}$ | -0.20 | -4.63 | -0.12 | mmu-miR-31*     |
| 11786 | 0.97 | $8.48 \times 10^{-1}$ | 0.20  | -4.63 | 0.05  | mmu-miR-342-3p  |
| 15237 | 0.97 | $8.49 \times 10^{-1}$ | -0.20 | -4.63 | -0.07 | mmu-let-7f      |
| 5100  | 0.97 | $8.49 \times 10^{-1}$ | 0.20  | -4.63 | 0.07  | mmu-miR-26b     |
| 3984  | 0.97 | $8.49 \times 10^{-1}$ | 0.20  | -4.63 | 0.07  |                 |
| 1743  | 0.97 | $8.49 \times 10^{-1}$ | 0.20  | -4.63 | 0.06  | mmu-miR-140     |
| 892   | 0.97 | $8.49 \times 10^{-1}$ | 0.20  | -4.63 | 0.05  | mmu-miR-130b    |
| 1608  | 0.97 | $8.50 \times 10^{-1}$ | -0.20 | -4.63 | -0.05 | mmu-let-7g      |
| 15470 | 0.97 | $8.50 \times 10^{-1}$ | 0.20  | -4.63 | 0.09  | mmu-miR-486     |
| 3000  | 0.97 | $8.51 \times 10^{-1}$ | 0.20  | -4.63 | 0.12  | mmu-miR-126-3p  |
| 12649 | 0.97 | $8.51 \times 10^{-1}$ | -0.20 | -4.63 | -0.16 | mmu-miR-668     |
| 338   | 0.97 | $8.51 \times 10^{-1}$ | -0.20 | -4.63 | -0.21 | mmu-miR-202-3p  |
| 2480  | 0.97 | $8.52 \times 10^{-1}$ | 0.19  | -4.63 | 0.21  | mmu-miR-324-5p  |
| 10310 | 0.97 | $8.53 \times 10^{-1}$ | 0.19  | -4.63 | 0.19  | mmu-miR-30a     |
| 10242 | 0.97 | $8.53 \times 10^{-1}$ | 0.19  | -4.63 | 0.04  |                 |

|       |      |                       |       |       |       |                 |
|-------|------|-----------------------|-------|-------|-------|-----------------|
| 1660  | 0.97 | 8.55x10 <sup>-1</sup> | -0.19 | -4.63 | -0.16 | mmu-miR-467e    |
| 11726 | 0.97 | 8.55x10 <sup>-1</sup> | 0.19  | -4.63 | 0.23  | mmu-miR-1187    |
| 911   | 0.97 | 8.55x10 <sup>-1</sup> | -0.19 | -4.63 | -0.08 | mmu-miR-290-3p  |
| 13071 | 0.97 | 8.56x10 <sup>-1</sup> | 0.19  | -4.63 | 0.06  | mmu-miR-130b    |
| 9148  | 0.97 | 8.56x10 <sup>-1</sup> | -0.19 | -4.63 | -0.17 | mmu-miR-697     |
| 7740  | 0.97 | 8.57x10 <sup>-1</sup> | -0.19 | -4.63 | -0.06 | mmu-miR-130a    |
| 11123 | 0.97 | 8.58x10 <sup>-1</sup> | -0.19 | -4.63 | -0.22 | mmu-miR-450a-5p |
| 3994  | 0.97 | 8.58x10 <sup>-1</sup> | 0.19  | -4.63 | 0.06  | mmu-miR-103     |
| 8502  | 0.97 | 8.59x10 <sup>-1</sup> | 0.19  | -4.63 | 0.11  | mmu-miR-196b    |
| 5079  | 0.97 | 8.59x10 <sup>-1</sup> | -0.19 | -4.63 | -0.07 | mmu-miR-223     |
| 11036 | 0.97 | 8.60x10 <sup>-1</sup> | 0.18  | -4.63 | 0.06  |                 |
| 14271 | 0.97 | 8.60x10 <sup>-1</sup> | 0.18  | -4.63 | 0.06  | mmu-let-7f      |
| 12536 | 0.97 | 8.61x10 <sup>-1</sup> | -0.18 | -4.63 | -0.11 | mmu-miR-720     |
| 5461  | 0.97 | 8.61x10 <sup>-1</sup> | 0.18  | -4.63 | 0.05  | mmu-miR-26b     |
| 9550  | 0.97 | 8.61x10 <sup>-1</sup> | -0.18 | -4.63 | -0.05 | mmu-let-7g      |
| 5337  | 0.97 | 8.62x10 <sup>-1</sup> | 0.18  | -4.63 | 0.06  | mmu-miR-15a     |
| 8296  | 0.97 | 8.62x10 <sup>-1</sup> | -0.18 | -4.63 | -0.21 | mmu-miR-202-3p  |
| 5964  | 0.97 | 8.63x10 <sup>-1</sup> | 0.18  | -4.63 | 0.23  | mmu-miR-378     |
| 8095  | 0.97 | 8.63x10 <sup>-1</sup> | -0.18 | -4.63 | -0.12 | mmu-miR-720     |
| 10887 | 0.97 | 8.63x10 <sup>-1</sup> | 0.18  | -4.63 | 0.05  | mmu-let-7i      |
| 2083  | 0.97 | 8.65x10 <sup>-1</sup> | -0.18 | -4.63 | -0.14 | mmu-miR-155     |
| 1136  | 0.97 | 8.65x10 <sup>-1</sup> | -0.18 | -4.63 | -0.04 | mmu-miR-130a    |
| 9354  | 0.97 | 8.66x10 <sup>-1</sup> | -0.18 | -4.63 | -0.21 | mmu-miR-202-3p  |
| 276   | 0.97 | 8.67x10 <sup>-1</sup> | -0.18 | -4.63 | -0.17 | mmu-miR-697     |
| 465   | 0.97 | 8.67x10 <sup>-1</sup> | 0.17  | -4.63 | 0.13  | mmu-miR-99b     |
| 7074  | 0.97 | 8.67x10 <sup>-1</sup> | 0.17  | -4.63 | 0.04  | mmu-let-7g      |
| 5986  | 0.97 | 8.67x10 <sup>-1</sup> | 0.17  | -4.63 | 0.06  | mmu-let-7f      |
| 15118 | 0.97 | 8.67x10 <sup>-1</sup> | -0.17 | -4.63 | -0.14 | mmu-miR-197     |
| 11963 | 0.97 | 8.68x10 <sup>-1</sup> | 0.17  | -4.63 | 0.23  | mmu-miR-449b    |
| 14505 | 0.97 | 8.69x10 <sup>-1</sup> | -0.17 | -4.63 | -0.04 | mmu-miR-30a*    |
| 5396  | 0.97 | 8.69x10 <sup>-1</sup> | 0.17  | -4.63 | 0.12  | mmu-miR-324-5p  |
| 9963  | 0.97 | 8.69x10 <sup>-1</sup> | 0.17  | -4.63 | 0.05  | mmu-miR-342-3p  |
| 1503  | 0.97 | 8.70x10 <sup>-1</sup> | -0.17 | -4.63 | -0.12 | mmu-miR-223     |
| 9904  | 0.97 | 8.70x10 <sup>-1</sup> | 0.17  | -4.63 | 0.35  | mmu-miR-697     |
| 11616 | 0.97 | 8.70x10 <sup>-1</sup> | -0.17 | -4.63 | -0.05 | mmu-miR-10a     |
| 11104 | 0.97 | 8.71x10 <sup>-1</sup> | 0.17  | -4.63 | 0.04  |                 |
| 9746  | 0.97 | 8.71x10 <sup>-1</sup> | 0.17  | -4.63 | 0.22  | mmu-miR-670     |
| 2089  | 0.97 | 8.71x10 <sup>-1</sup> | -0.17 | -4.63 | -0.05 | mmu-let-7f      |
| 12887 | 0.97 | 8.72x10 <sup>-1</sup> | 0.17  | -4.63 | 0.04  |                 |
| 6208  | 0.97 | 8.72x10 <sup>-1</sup> | -0.17 | -4.63 | -0.39 | mmu-miR-380-3p  |
| 3495  | 0.97 | 8.72x10 <sup>-1</sup> | -0.17 | -4.63 | -0.11 | mmu-miR-720     |
| 901   | 0.97 | 8.73x10 <sup>-1</sup> | -0.17 | -4.63 | -0.06 | mmu-miR-185     |
| 8955  | 0.97 | 8.73x10 <sup>-1</sup> | 0.17  | -4.63 | 0.04  |                 |
| 14909 | 0.97 | 8.73x10 <sup>-1</sup> | -0.17 | -4.63 | -0.14 | mmu-miR-582-3p  |
| 9499  | 0.97 | 8.74x10 <sup>-1</sup> | -0.17 | -4.63 | -0.06 | mmu-miR-296-5p  |
| 8370  | 0.97 | 8.75x10 <sup>-1</sup> | 0.16  | -4.63 | 0.17  | mmu-miR-190b    |

|       |      |                       |       |       |       |                |
|-------|------|-----------------------|-------|-------|-------|----------------|
| 8010  | 0.97 | $8.76 \times 10^{-1}$ | -0.16 | -4.63 | -0.04 | mmu-miR-103    |
| 7286  | 0.97 | $8.77 \times 10^{-1}$ | -0.16 | -4.63 | -0.12 | mmu-miR-542-3p |
| 736   | 0.98 | $8.77 \times 10^{-1}$ | -0.16 | -4.63 | -0.16 | mmu-miR-324-3p |
| 5183  | 0.98 | $8.78 \times 10^{-1}$ | 0.16  | -4.63 | 0.04  |                |
| 3261  | 0.98 | $8.79 \times 10^{-1}$ | -0.16 | -4.63 | -0.04 | mmu-miR-342-3p |
| 13504 | 0.98 | $8.80 \times 10^{-1}$ | 0.16  | -4.63 | 0.04  | mmu-let-7g     |
| 6733  | 0.98 | $8.80 \times 10^{-1}$ | -0.16 | -4.63 | -0.09 | mmu-miR-30a*   |
| 6804  | 0.98 | $8.80 \times 10^{-1}$ | 0.16  | -4.63 | 0.04  | mmu-miR-107    |
| 13947 | 0.98 | $8.81 \times 10^{-1}$ | 0.16  | -4.63 | 0.19  | mmu-miR-1904   |
| 5928  | 0.98 | $8.82 \times 10^{-1}$ | 0.16  | -4.63 | 0.05  | mmu-miR-342-3p |
| 6936  | 0.98 | $8.82 \times 10^{-1}$ | -0.15 | -4.63 | -0.04 | mmu-miR-652    |
| 4328  | 0.98 | $8.83 \times 10^{-1}$ | -0.15 | -4.63 | -0.14 | mmu-miR-1      |
| 149   | 0.98 | $8.83 \times 10^{-1}$ | -0.15 | -4.63 | -0.12 | mmu-let-7f*    |
| 9057  | 0.98 | $8.84 \times 10^{-1}$ | 0.15  | -4.63 | 0.08  | mmu-miR-423-5p |
| 8666  | 0.98 | $8.84 \times 10^{-1}$ | -0.15 | -4.63 | -0.12 | mmu-miR-677    |
| 2934  | 0.98 | $8.84 \times 10^{-1}$ | 0.15  | -4.63 | 0.04  | mmu-miR-322    |
| 12454 | 0.98 | $8.85 \times 10^{-1}$ | -0.15 | -4.63 | -0.09 | mmu-miR-720    |
| 15727 | 0.98 | $8.85 \times 10^{-1}$ | -0.15 | -4.63 | -0.04 | mmu-miR-27a    |
| 3591  | 0.98 | $8.85 \times 10^{-1}$ | 0.15  | -4.63 | 0.04  | mmu-let-7i     |
| 2766  | 0.98 | $8.85 \times 10^{-1}$ | -0.15 | -4.63 | -0.14 | mmu-miR-425*   |
| 8077  | 0.98 | $8.85 \times 10^{-1}$ | -0.15 | -4.63 | -0.04 | mmu-miR-130b   |
| 8152  | 0.98 | $8.86 \times 10^{-1}$ | -0.15 | -4.63 | -0.15 | mmu-miR-202-3p |
| 5971  | 0.98 | $8.86 \times 10^{-1}$ | 0.15  | -4.63 | 0.04  | mmu-miR-24     |
| 14449 | 0.98 | $8.86 \times 10^{-1}$ | 0.15  | -4.63 | 0.09  | mmu-miR-30a*   |
| 1715  | 0.98 | $8.87 \times 10^{-1}$ | -0.15 | -4.63 | -0.04 | mmu-miR-30a*   |
| 690   | 0.98 | $8.88 \times 10^{-1}$ | 0.15  | -4.63 | 0.04  | mmu-miR-425    |
| 1150  | 0.98 | $8.88 \times 10^{-1}$ | 0.15  | -4.63 | 0.14  |                |
| 2412  | 0.98 | $8.88 \times 10^{-1}$ | -0.15 | -4.63 | -0.06 | mmu-miR-669g   |
| 4041  | 0.98 | $8.88 \times 10^{-1}$ | -0.15 | -4.63 | -0.37 | mmu-miR-193b   |
| 4574  | 0.98 | $8.89 \times 10^{-1}$ | -0.15 | -4.63 | -0.13 | mmu-miR-19a    |
| 9509  | 0.98 | $8.89 \times 10^{-1}$ | -0.15 | -4.63 | -0.04 | mmu-miR-96     |
| 8597  | 0.98 | $8.91 \times 10^{-1}$ | 0.14  | -4.63 | 0.15  | mmu-miR-340-3p |
| 15730 | 0.98 | $8.91 \times 10^{-1}$ | -0.14 | -4.63 | -0.05 | mmu-miR-29c    |
| 15704 | 0.98 | $8.91 \times 10^{-1}$ | 0.14  | -4.63 | 0.13  | mmu-miR-202-3p |
| 12439 | 0.98 | $8.91 \times 10^{-1}$ | 0.14  | -4.63 | 0.07  | mmu-miR-196a   |
| 13285 | 0.98 | $8.91 \times 10^{-1}$ | 0.14  | -4.63 | 0.20  | mmu-miR-674*   |
| 1728  | 0.98 | $8.91 \times 10^{-1}$ | -0.14 | -4.63 | -0.05 | mmu-miR-130a   |
| 4949  | 0.98 | $8.91 \times 10^{-1}$ | -0.14 | -4.63 | -0.06 | mmu-miR-290-3p |
| 4808  | 0.98 | $8.92 \times 10^{-1}$ | 0.14  | -4.63 | 0.07  | mmu-miR-33     |
| 5942  | 0.98 | $8.95 \times 10^{-1}$ | 0.14  | -4.63 | 0.04  | mmu-miR-130a   |
| 594   | 0.98 | $8.96 \times 10^{-1}$ | -0.14 | -4.63 | -0.10 | mmu-miR-126-5p |
| 15134 | 0.98 | $8.96 \times 10^{-1}$ | 0.14  | -4.63 | 0.10  | mmu-miR-183*   |
| 7095  | 0.98 | $8.96 \times 10^{-1}$ | -0.14 | -4.63 | -0.09 | mmu-miR-720    |
| 2663  | 0.98 | $8.96 \times 10^{-1}$ | -0.14 | -4.63 | -0.09 | mmu-miR-720    |
| 15465 | 0.98 | $8.96 \times 10^{-1}$ | -0.14 | -4.63 | -0.04 | mmu-miR-322    |
| 15648 | 0.98 | $8.97 \times 10^{-1}$ | 0.14  | -4.63 | 0.03  | mmu-miR-23a    |

|       |      |                       |       |       |       |                 |
|-------|------|-----------------------|-------|-------|-------|-----------------|
| 9725  | 0.98 | $8.97 \times 10^{-1}$ | 0.13  | -4.63 | 0.04  | mmu-miR-10a     |
| 15716 | 0.98 | $9.00 \times 10^{-1}$ | -0.13 | -4.63 | -0.19 | mmu-miR-873     |
| 5614  | 0.98 | $9.00 \times 10^{-1}$ | 0.13  | -4.63 | 0.15  | mmu-miR-1904    |
| 495   | 0.98 | $9.00 \times 10^{-1}$ | 0.13  | -4.63 | 0.04  | mmu-miR-98      |
| 2543  | 0.98 | $9.01 \times 10^{-1}$ | 0.13  | -4.63 | 0.10  | mmu-miR-191*    |
| 6444  | 0.98 | $9.01 \times 10^{-1}$ | -0.13 | -4.63 | -0.03 | mmu-miR-652     |
| 5478  | 0.98 | $9.01 \times 10^{-1}$ | 0.13  | -4.63 | 0.06  | mmu-miR-195     |
| 310   | 0.98 | $9.02 \times 10^{-1}$ | 0.13  | -4.63 | 0.18  | mmu-miR-202-3p  |
| 9375  | 0.98 | $9.02 \times 10^{-1}$ | 0.13  | -4.63 | 0.15  | mmu-miR-181d    |
| 10618 | 0.98 | $9.02 \times 10^{-1}$ | 0.13  | -4.63 | 0.14  | mmu-miR-136     |
| 1043  | 0.98 | $9.02 \times 10^{-1}$ | 0.13  | -4.63 | 0.14  | mmu-miR-300*    |
| 9531  | 0.98 | $9.02 \times 10^{-1}$ | 0.13  | -4.63 | 0.10  | mmu-miR-291a-3p |
| 730   | 0.98 | $9.03 \times 10^{-1}$ | -0.13 | -4.63 | -0.05 | mmu-miR-30d     |
| 11845 | 0.98 | $9.03 \times 10^{-1}$ | 0.13  | -4.63 | 0.10  | mmu-miR-30b     |
| 2947  | 0.98 | $9.03 \times 10^{-1}$ | 0.13  | -4.63 | 0.06  | mmu-miR-15b*    |
| 13018 | 0.98 | $9.04 \times 10^{-1}$ | -0.13 | -4.63 | -0.04 | mmu-miR-107     |
| 6035  | 0.98 | $9.05 \times 10^{-1}$ | 0.13  | -4.63 | 0.03  |                 |
| 10126 | 0.98 | $9.06 \times 10^{-1}$ | -0.12 | -4.63 | -0.06 | mmu-miR-96      |
| 2563  | 0.98 | $9.06 \times 10^{-1}$ | -0.12 | -4.63 | -0.04 | mmu-miR-503     |
| 9079  | 0.98 | $9.06 \times 10^{-1}$ | -0.12 | -4.63 | -0.03 | mmu-miR-15a     |
| 677   | 0.98 | $9.06 \times 10^{-1}$ | 0.12  | -4.63 | 0.17  | mmu-miR-202-3p  |
| 3821  | 0.98 | $9.06 \times 10^{-1}$ | 0.12  | -4.63 | 0.05  | mmu-miR-324-5p  |
| 2457  | 0.98 | $9.07 \times 10^{-1}$ | 0.12  | -4.63 | 0.03  | mmu-miR-107     |
| 12075 | 0.98 | $9.08 \times 10^{-1}$ | -0.12 | -4.63 | -0.03 | mmu-miR-342-3p  |
| 3357  | 0.98 | $9.08 \times 10^{-1}$ | 0.12  | -4.63 | 0.03  | mmu-miR-30d     |
| 125   | 0.98 | $9.08 \times 10^{-1}$ | -0.12 | -4.63 | -0.10 | mmu-miR-294     |
| 10252 | 0.98 | $9.09 \times 10^{-1}$ | 0.12  | -4.63 | 0.08  | mmu-miR-324-5p  |
| 6263  | 0.98 | $9.09 \times 10^{-1}$ | -0.12 | -4.63 | -0.13 | mmu-miR-697     |
| 3351  | 0.98 | $9.09 \times 10^{-1}$ | 0.12  | -4.63 | 0.03  | mmu-miR-221     |
| 1900  | 0.98 | $9.10 \times 10^{-1}$ | -0.12 | -4.63 | -0.13 | mmu-miR-202-3p  |
| 3511  | 0.98 | $9.10 \times 10^{-1}$ | 0.12  | -4.63 | 0.07  | mmu-miR-30a     |
| 11502 | 0.98 | $9.10 \times 10^{-1}$ | -0.12 | -4.63 | -0.03 | mmu-miR-15a     |
| 14138 | 0.98 | $9.11 \times 10^{-1}$ | 0.12  | -4.63 | 0.09  | mmu-let-7f*     |
| 4401  | 0.98 | $9.11 \times 10^{-1}$ | -0.12 | -4.63 | -0.03 |                 |
| 3810  | 0.98 | $9.11 \times 10^{-1}$ | 0.12  | -4.63 | 0.25  | mmu-miR-200b    |
| 4439  | 0.98 | $9.12 \times 10^{-1}$ | -0.12 | -4.63 | -0.12 | mmu-miR-741     |
| 5320  | 0.98 | $9.12 \times 10^{-1}$ | 0.12  | -4.63 | 0.14  | mmu-miR-539     |
| 1959  | 0.98 | $9.13 \times 10^{-1}$ | -0.11 | -4.63 | -0.04 | mmu-miR-98      |
| 8569  | 0.98 | $9.13 \times 10^{-1}$ | -0.11 | -4.63 | -0.04 | mmu-let-7f      |
| 13502 | 0.98 | $9.14 \times 10^{-1}$ | 0.11  | -4.63 | 0.02  |                 |
| 706   | 0.98 | $9.14 \times 10^{-1}$ | 0.11  | -4.63 | 0.03  | mmu-miR-15b     |
| 15703 | 0.98 | $9.14 \times 10^{-1}$ | 0.11  | -4.63 | 0.04  | mmu-miR-10b     |
| 4734  | 0.98 | $9.14 \times 10^{-1}$ | 0.11  | -4.63 | 0.07  |                 |
| 14805 | 0.98 | $9.15 \times 10^{-1}$ | 0.11  | -4.63 | 0.12  | mmu-miR-92b     |
| 7888  | 0.98 | $9.16 \times 10^{-1}$ | 0.11  | -4.63 | 0.08  | mmu-miR-30a*    |
| 11096 | 0.98 | $9.16 \times 10^{-1}$ | 0.11  | -4.63 | 0.06  | mmu-miR-30c     |



|       |      |                       |       |       |       |                 |
|-------|------|-----------------------|-------|-------|-------|-----------------|
| 10928 | 0.98 | 9.16x10 <sup>-1</sup> | -0.11 | -4.63 | -0.05 | mmu-let-7f*     |
| 8000  | 0.98 | 9.16x10 <sup>-1</sup> | 0.11  | -4.63 | 0.03  | mmu-miR-140*    |
| 4902  | 0.98 | 9.16x10 <sup>-1</sup> | 0.11  | -4.63 | 0.10  | mmu-miR-125b-5p |
| 11520 | 0.98 | 9.16x10 <sup>-1</sup> | -0.11 | -4.63 | -0.05 | mmu-miR-192     |
| 6478  | 0.98 | 9.16x10 <sup>-1</sup> | -0.11 | -4.63 | -0.02 | mmu-miR-15a     |
| 13190 | 0.98 | 9.17x10 <sup>-1</sup> | 0.11  | -4.63 | 0.04  | mmu-miR-29b*    |
| 1644  | 0.98 | 9.17x10 <sup>-1</sup> | 0.11  | -4.63 | 0.05  | mmu-miR-26b     |
| 6967  | 0.98 | 9.17x10 <sup>-1</sup> | -0.11 | -4.63 | -0.09 | mmu-miR-345-5p  |
| 12239 | 0.98 | 9.17x10 <sup>-1</sup> | -0.11 | -4.63 | -0.07 | mmu-miR-720     |
| 12339 | 0.98 | 9.18x10 <sup>-1</sup> | -0.11 | -4.63 | -0.03 | mmu-miR-96      |
| 2470  | 0.98 | 9.18x10 <sup>-1</sup> | -0.11 | -4.63 | -0.05 | mmu-miR-30e     |
| 5052  | 0.98 | 9.18x10 <sup>-1</sup> | -0.11 | -4.63 | -0.06 | mmu-miR-129-3p  |
| 15663 | 0.98 | 9.18x10 <sup>-1</sup> | 0.11  | -4.63 | 0.03  |                 |
| 6395  | 0.98 | 9.19x10 <sup>-1</sup> | -0.11 | -4.63 | -0.04 | mmu-let-7f      |
| 13919 | 0.98 | 9.20x10 <sup>-1</sup> | -0.11 | -4.63 | -0.04 | mmu-miR-10b     |
| 12581 | 0.98 | 9.20x10 <sup>-1</sup> | -0.10 | -4.63 | -0.03 | mmu-let-7g      |
| 11617 | 0.98 | 9.21x10 <sup>-1</sup> | 0.10  | -4.63 | 0.03  | mmu-miR-15b     |
| 6653  | 0.98 | 9.21x10 <sup>-1</sup> | -0.10 | -4.63 | -0.03 | mmu-let-7g      |
| 5442  | 0.98 | 9.21x10 <sup>-1</sup> | -0.10 | -4.63 | -0.06 | mmu-miR-720     |
| 5159  | 0.98 | 9.21x10 <sup>-1</sup> | -0.10 | -4.63 | -0.05 | mmu-miR-196b    |
| 9454  | 0.98 | 9.21x10 <sup>-1</sup> | -0.10 | -4.63 | -0.08 | mmu-miR-10b     |
| 4984  | 0.98 | 9.22x10 <sup>-1</sup> | -0.10 | -4.63 | -0.03 | mmu-miR-322     |
| 9060  | 0.98 | 9.22x10 <sup>-1</sup> | 0.10  | -4.63 | 0.16  | mmu-miR-202-3p  |
| 15171 | 0.98 | 9.23x10 <sup>-1</sup> | -0.10 | -4.63 | -0.06 | mmu-miR-720     |
| 9944  | 0.98 | 9.23x10 <sup>-1</sup> | 0.10  | -4.63 | 0.09  | mmu-miR-668     |
| 7132  | 0.98 | 9.24x10 <sup>-1</sup> | -0.10 | -4.63 | -0.05 | mmu-miR-294     |
| 14053 | 0.98 | 9.24x10 <sup>-1</sup> | -0.10 | -4.63 | -0.05 | mmu-let-7b*     |
| 6873  | 0.98 | 9.25x10 <sup>-1</sup> | -0.10 | -4.63 | -0.07 | mmu-miR-30b     |
| 9722  | 0.98 | 9.25x10 <sup>-1</sup> | 0.10  | -4.63 | 0.12  | mmu-miR-697     |
| 1382  | 0.98 | 9.25x10 <sup>-1</sup> | -0.10 | -4.63 | -0.03 | mmu-miR-423-5p  |
| 7197  | 0.98 | 9.25x10 <sup>-1</sup> | 0.10  | -4.63 | 0.06  | mmu-miR-26b     |
| 2742  | 0.98 | 9.25x10 <sup>-1</sup> | -0.10 | -4.63 | -0.07 | mmu-miR-29b     |
| 12850 | 0.98 | 9.27x10 <sup>-1</sup> | -0.10 | -4.63 | -0.03 | mmu-miR-96      |
| 7387  | 0.98 | 9.27x10 <sup>-1</sup> | 0.10  | -4.63 | 0.10  |                 |
| 11019 | 0.98 | 9.28x10 <sup>-1</sup> | 0.09  | -4.63 | 0.07  | mmu-miR-365     |
| 8192  | 0.98 | 9.28x10 <sup>-1</sup> | -0.09 | -4.63 | -0.04 | mmu-miR-125a-3p |
| 7979  | 0.98 | 9.28x10 <sup>-1</sup> | 0.09  | -4.63 | 0.04  | mmu-miR-221     |
| 11031 | 0.98 | 9.29x10 <sup>-1</sup> | -0.09 | -4.63 | -0.03 | mmu-let-7f      |
| 14873 | 0.98 | 9.30x10 <sup>-1</sup> | 0.09  | -4.63 | 0.10  | mmu-miR-30a*    |
| 7616  | 0.98 | 9.30x10 <sup>-1</sup> | -0.09 | -4.63 | -0.02 | mmu-miR-96      |
| 1571  | 0.98 | 9.30x10 <sup>-1</sup> | -0.09 | -4.63 | -0.03 | mmu-let-7f      |
| 2513  | 0.98 | 9.31x10 <sup>-1</sup> | -0.09 | -4.63 | -0.02 | mmu-miR-24      |
| 14409 | 0.99 | 9.33x10 <sup>-1</sup> | -0.09 | -4.63 | -0.06 | mmu-miR-720     |
| 4256  | 0.99 | 9.33x10 <sup>-1</sup> | 0.09  | -4.63 | 0.03  | mmu-miR-29b     |
| 13123 | 0.99 | 9.34x10 <sup>-1</sup> | 0.09  | -4.63 | 0.02  | mmu-miR-23b     |
| 8514  | 0.99 | 9.34x10 <sup>-1</sup> | 0.09  | -4.63 | 0.08  |                 |

|       |      |                       |       |       |       |                 |
|-------|------|-----------------------|-------|-------|-------|-----------------|
| 3932  | 0.99 | $9.35 \times 10^{-1}$ | -0.09 | -4.63 | -0.05 |                 |
| 635   | 0.99 | $9.35 \times 10^{-1}$ | -0.09 | -4.63 | -0.03 | mmu-let-7d      |
| 8836  | 0.99 | $9.35 \times 10^{-1}$ | 0.08  | -4.63 | 0.03  | mmu-miR-29c     |
| 8565  | 0.99 | $9.35 \times 10^{-1}$ | -0.08 | -4.63 | -0.05 | mmu-miR-876-5p  |
| 9959  | 0.99 | $9.36 \times 10^{-1}$ | -0.08 | -4.63 | -0.07 | mmu-miR-191*    |
| 1184  | 0.99 | $9.36 \times 10^{-1}$ | -0.08 | -4.63 | -0.06 | mmu-miR-702     |
| 12265 | 0.99 | $9.37 \times 10^{-1}$ | -0.08 | -4.63 | -0.02 | mmu-miR-423-5p  |
| 15405 | 0.99 | $9.39 \times 10^{-1}$ | -0.08 | -4.63 | -0.04 | mmu-miR-29a*    |
| 11112 | 0.99 | $9.39 \times 10^{-1}$ | -0.08 | -4.63 | -0.05 | mmu-miR-881     |
| 5736  | 0.99 | $9.40 \times 10^{-1}$ | 0.08  | -4.63 | 0.02  | mmu-let-7f      |
| 11332 | 0.99 | $9.40 \times 10^{-1}$ | -0.08 | -4.63 | -0.05 | mmu-miR-96      |
| 1785  | 0.99 | $9.40 \times 10^{-1}$ | 0.08  | -4.63 | 0.02  | mmu-miR-130a    |
| 14011 | 0.99 | $9.40 \times 10^{-1}$ | 0.08  | -4.63 | 0.03  | mmu-miR-301a    |
| 11256 | 0.99 | $9.40 \times 10^{-1}$ | 0.08  | -4.63 | 0.02  | mmu-miR-10a     |
| 8801  | 0.99 | $9.42 \times 10^{-1}$ | 0.08  | -4.63 | 0.04  | mmu-miR-500     |
| 15600 | 0.99 | $9.42 \times 10^{-1}$ | 0.08  | -4.63 | 0.04  | mmu-miR-26a     |
| 7631  | 0.99 | $9.43 \times 10^{-1}$ | 0.08  | -4.63 | 0.03  | mmu-miR-31*     |
| 12161 | 0.99 | $9.43 \times 10^{-1}$ | -0.07 | -4.63 | -0.02 | mmu-miR-652     |
| 12174 | 0.99 | $9.43 \times 10^{-1}$ | 0.07  | -4.63 | 0.02  | mmu-miR-652     |
| 4527  | 0.99 | $9.43 \times 10^{-1}$ | 0.07  | -4.63 | 0.04  | mmu-miR-30a     |
| 2967  | 0.99 | $9.44 \times 10^{-1}$ | -0.07 | -4.63 | -0.02 | mmu-miR-10a     |
| 12169 | 0.99 | $9.44 \times 10^{-1}$ | -0.07 | -4.63 | -0.02 | mmu-miR-342-3p  |
| 2981  | 0.99 | $9.44 \times 10^{-1}$ | 0.07  | -4.63 | 0.04  | mmu-miR-7a      |
| 7033  | 0.99 | $9.45 \times 10^{-1}$ | -0.07 | -4.63 | -0.02 | mmu-miR-350     |
| 10942 | 0.99 | $9.45 \times 10^{-1}$ | 0.07  | -4.63 | 0.10  | mmu-miR-702     |
| 7306  | 0.99 | $9.45 \times 10^{-1}$ | 0.07  | -4.63 | 0.13  | mmu-miR-202-3p  |
| 2486  | 0.99 | $9.45 \times 10^{-1}$ | -0.07 | -4.63 | -0.04 | mmu-miR-30e*    |
| 5718  | 0.99 | $9.45 \times 10^{-1}$ | -0.07 | -4.63 | -0.02 | mmu-miR-125a-5p |
| 11355 | 0.99 | $9.45 \times 10^{-1}$ | -0.07 | -4.63 | -0.02 | mmu-miR-10a     |
| 4878  | 0.99 | $9.45 \times 10^{-1}$ | 0.07  | -4.63 | 0.02  | mmu-miR-15a     |
| 10483 | 0.99 | $9.46 \times 10^{-1}$ | 0.07  | -4.63 | 0.02  | mmu-miR-15b     |
| 559   | 0.99 | $9.47 \times 10^{-1}$ | 0.07  | -4.63 | 0.05  | mmu-miR-30a     |
| 15493 | 0.99 | $9.47 \times 10^{-1}$ | 0.07  | -4.63 | 0.04  | mmu-miR-425*    |
| 15279 | 0.99 | $9.47 \times 10^{-1}$ | 0.07  | -4.63 | 0.02  | mmu-miR-15b     |
| 7715  | 0.99 | $9.47 \times 10^{-1}$ | -0.07 | -4.63 | -0.03 |                 |
| 8637  | 0.99 | $9.48 \times 10^{-1}$ | -0.07 | -4.63 | -0.04 | mmu-miR-702     |
| 5164  | 0.99 | $9.48 \times 10^{-1}$ | -0.07 | -4.63 | -0.09 | mmu-miR-877*    |
| 6355  | 0.99 | $9.48 \times 10^{-1}$ | 0.07  | -4.63 | 0.02  | mmu-miR-107     |
| 4659  | 0.99 | $9.48 \times 10^{-1}$ | 0.07  | -4.63 | 0.02  | mmu-let-7a      |
| 4180  | 0.99 | $9.49 \times 10^{-1}$ | -0.07 | -4.63 | -0.02 | mmu-miR-140     |
| 12701 | 0.99 | $9.50 \times 10^{-1}$ | -0.07 | -4.63 | -0.04 | mmu-miR-668     |
| 1898  | 0.99 | $9.50 \times 10^{-1}$ | 0.07  | -4.63 | 0.02  | mmu-miR-130b    |
| 13350 | 0.99 | $9.50 \times 10^{-1}$ | -0.07 | -4.63 | -0.08 | mmu-miR-140*    |
| 5682  | 0.99 | $9.50 \times 10^{-1}$ | -0.07 | -4.63 | -0.03 | mmu-miR-96      |
| 9913  | 0.99 | $9.52 \times 10^{-1}$ | 0.06  | -4.63 | 0.07  | mmu-miR-345-5p  |
| 7670  | 0.99 | $9.53 \times 10^{-1}$ | -0.06 | -4.63 | -0.11 | mmu-miR-697     |

|       |      |                       |       |       |       |                |
|-------|------|-----------------------|-------|-------|-------|----------------|
| 8373  | 0.99 | 9.53x10 <sup>-1</sup> | 0.06  | -4.63 | 0.02  | mmu-miR-10a    |
| 12489 | 0.99 | 9.55x10 <sup>-1</sup> | -0.06 | -4.63 | -0.01 | mmu-miR-15a    |
| 15556 | 0.99 | 9.55x10 <sup>-1</sup> | 0.06  | -4.63 | 0.02  | mmu-miR-28     |
| 3294  | 0.99 | 9.55x10 <sup>-1</sup> | -0.06 | -4.63 | -0.06 | mmu-miR-342-5p |
| 10606 | 0.99 | 9.55x10 <sup>-1</sup> | 0.06  | -4.63 | 0.03  | mmu-miR-31*    |
| 13568 | 0.99 | 9.55x10 <sup>-1</sup> | 0.06  | -4.63 | 0.02  | mmu-miR-10a    |
| 4280  | 0.99 | 9.55x10 <sup>-1</sup> | -0.06 | -4.63 | -0.03 | mmu-miR-149    |
| 4055  | 0.99 | 9.56x10 <sup>-1</sup> | 0.06  | -4.63 | 0.01  | mmu-miR-107    |
| 386   | 0.99 | 9.56x10 <sup>-1</sup> | 0.06  | -4.63 | 0.02  | mmu-miR-196b   |
| 14720 | 0.99 | 9.56x10 <sup>-1</sup> | -0.06 | -4.63 | -0.03 | mmu-miR-720    |
| 10113 | 0.99 | 9.56x10 <sup>-1</sup> | -0.06 | -4.63 | -0.02 | mmu-miR-221    |
| 6788  | 0.99 | 9.56x10 <sup>-1</sup> | 0.06  | -4.63 | 0.01  |                |
| 13228 | 0.99 | 9.56x10 <sup>-1</sup> | -0.06 | -4.63 | -0.07 | mmu-miR-100    |
| 51    | 0.99 | 9.57x10 <sup>-1</sup> | 0.06  | -4.63 | 0.03  | mmu-miR-1906   |
| 9742  | 0.99 | 9.57x10 <sup>-1</sup> | 0.06  | -4.63 | 0.02  | mmu-miR-103    |
| 645   | 0.99 | 9.57x10 <sup>-1</sup> | -0.06 | -4.63 | -0.02 | mmu-let-7f     |
| 2523  | 0.99 | 9.57x10 <sup>-1</sup> | -0.06 | -4.63 | -0.05 |                |
| 15652 | 0.99 | 9.57x10 <sup>-1</sup> | -0.06 | -4.63 | -0.11 | mmu-miR-467e*  |
| 9958  | 0.99 | 9.58x10 <sup>-1</sup> | 0.06  | -4.63 | 0.07  | mmu-miR-467e   |
| 6789  | 0.99 | 9.58x10 <sup>-1</sup> | -0.06 | -4.63 | -0.02 | mmu-miR-365    |
| 9133  | 0.99 | 9.58x10 <sup>-1</sup> | 0.06  | -4.63 | 0.03  |                |
| 12430 | 0.99 | 9.58x10 <sup>-1</sup> | -0.05 | -4.63 | -0.01 | mmu-miR-15a    |
| 12950 | 0.99 | 9.58x10 <sup>-1</sup> | 0.05  | -4.63 | 0.01  | mmu-miR-15b    |
| 11132 | 0.99 | 9.59x10 <sup>-1</sup> | 0.05  | -4.63 | 0.02  | mmu-miR-301a   |
| 15660 | 0.99 | 9.60x10 <sup>-1</sup> | 0.05  | -4.63 | 0.03  | mmu-miR-369-3p |
| 13448 | 0.99 | 9.60x10 <sup>-1</sup> | -0.05 | -4.63 | -0.02 | mmu-miR-96     |
| 14337 | 0.99 | 9.61x10 <sup>-1</sup> | 0.05  | -4.63 | 0.02  | mmu-miR-92b    |
| 8966  | 0.99 | 9.61x10 <sup>-1</sup> | -0.05 | -4.63 | -0.01 | mmu-miR-15a    |
| 1340  | 0.99 | 9.61x10 <sup>-1</sup> | -0.05 | -4.63 | -0.04 | mmu-miR-149    |
| 1705  | 0.99 | 9.61x10 <sup>-1</sup> | -0.05 | -4.63 | -0.03 | mmu-miR-720    |
| 14185 | 0.99 | 9.62x10 <sup>-1</sup> | 0.05  | -4.63 | 0.03  | mghv-miR-M1-2  |
| 3869  | 0.99 | 9.62x10 <sup>-1</sup> | 0.05  | -4.63 | 0.04  | mmu-let-7f*    |
| 6981  | 0.99 | 9.62x10 <sup>-1</sup> | -0.05 | -4.63 | -0.06 | mmu-miR-697    |
| 15344 | 0.99 | 9.63x10 <sup>-1</sup> | 0.05  | -4.63 | 0.01  | mmu-miR-107    |
| 7096  | 0.99 | 9.63x10 <sup>-1</sup> | 0.05  | -4.63 | 0.12  | mmu-miR-340-3p |
| 14850 | 0.99 | 9.64x10 <sup>-1</sup> | -0.05 | -4.63 | -0.06 | mmu-miR-30e    |
| 2036  | 0.99 | 9.64x10 <sup>-1</sup> | -0.05 | -4.63 | -0.01 |                |
| 11392 | 0.99 | 9.64x10 <sup>-1</sup> | -0.05 | -4.63 | -0.02 | mmu-miR-361    |
| 14597 | 0.99 | 9.64x10 <sup>-1</sup> | -0.05 | -4.63 | -0.03 | mmu-miR-720    |
| 15105 | 0.99 | 9.65x10 <sup>-1</sup> | 0.05  | -4.63 | 0.01  | mghv-miR-M1-2  |
| 10021 | 0.99 | 9.68x10 <sup>-1</sup> | -0.04 | -4.63 | -0.01 | mmu-miR-183    |
| 11156 | 0.99 | 9.68x10 <sup>-1</sup> | -0.04 | -4.63 | -0.02 | mmu-miR-10b    |
| 8675  | 0.99 | 9.68x10 <sup>-1</sup> | 0.04  | -4.63 | 0.01  | mmu-miR-10a    |
| 11412 | 0.99 | 9.69x10 <sup>-1</sup> | 0.04  | -4.63 | 0.01  | mmu-miR-130b   |
| 5447  | 0.99 | 9.69x10 <sup>-1</sup> | -0.04 | -4.63 | -0.01 | mmu-miR-881    |
| 7447  | 0.99 | 9.70x10 <sup>-1</sup> | 0.04  | -4.63 | 0.01  | mmu-let-7a     |

|       |      |                       |       |       |       |                 |
|-------|------|-----------------------|-------|-------|-------|-----------------|
| 3516  | 0.99 | 9.70x10 <sup>-1</sup> | -0.04 | -4.63 | -0.03 | mmu-miR-720     |
| 9915  | 0.99 | 9.72x10 <sup>-1</sup> | -0.04 | -4.63 | -0.04 | mmu-miR-369-3p  |
| 14070 | 0.99 | 9.73x10 <sup>-1</sup> | -0.04 | -4.63 | -0.02 | mmu-miR-182     |
| 4038  | 0.99 | 9.73x10 <sup>-1</sup> | -0.04 | -4.63 | -0.05 | mmu-miR-206     |
| 4576  | 0.99 | 9.75x10 <sup>-1</sup> | 0.03  | -4.63 | 0.01  | mmu-miR-331-3p  |
| 2811  | 0.99 | 9.75x10 <sup>-1</sup> | 0.03  | -4.63 | 0.01  | mmu-let-7g      |
| 159   | 0.99 | 9.75x10 <sup>-1</sup> | -0.03 | -4.63 | -0.03 | mmu-miR-880     |
| 15618 | 0.99 | 9.75x10 <sup>-1</sup> | -0.03 | -4.63 | -0.01 | mmu-miR-107     |
| 9024  | 0.99 | 9.75x10 <sup>-1</sup> | 0.03  | -4.63 | 0.01  | mmu-miR-10a     |
| 14760 | 0.99 | 9.76x10 <sup>-1</sup> | 0.03  | -4.63 | 0.04  |                 |
| 5716  | 0.99 | 9.76x10 <sup>-1</sup> | -0.03 | -4.63 | -0.01 | mmu-miR-342-3p  |
| 2192  | 0.99 | 9.77x10 <sup>-1</sup> | -0.03 | -4.63 | -0.01 | mmu-miR-10a     |
| 9399  | 0.99 | 9.77x10 <sup>-1</sup> | 0.03  | -4.63 | 0.02  | mmu-let-7b*     |
| 12191 | 0.99 | 9.77x10 <sup>-1</sup> | -0.03 | -4.63 | -0.01 | mmu-miR-31*     |
| 982   | 0.99 | 9.78x10 <sup>-1</sup> | 0.03  | -4.63 | 0.02  | mmu-miR-186     |
| 10474 | 0.99 | 9.79x10 <sup>-1</sup> | 0.03  | -4.63 | 0.02  | mmu-miR-221     |
| 11324 | 1.00 | 9.82x10 <sup>-1</sup> | 0.02  | -4.63 | 0.01  | mmu-miR-324-3p  |
| 3003  | 1.00 | 9.82x10 <sup>-1</sup> | -0.02 | -4.63 | -0.01 | mmu-miR-15b     |
| 13999 | 1.00 | 9.82x10 <sup>-1</sup> | 0.02  | -4.63 | 0.01  | mmu-miR-130a    |
| 5255  | 1.00 | 9.83x10 <sup>-1</sup> | -0.02 | -4.63 | -0.01 | mmu-miR-107     |
| 15737 | 1.00 | 9.83x10 <sup>-1</sup> | -0.02 | -4.63 | -0.01 | mmu-miR-16      |
| 5075  | 1.00 | 9.84x10 <sup>-1</sup> | 0.02  | -4.63 | 0.01  | mmu-miR-26a     |
| 12832 | 1.00 | 9.84x10 <sup>-1</sup> | -0.02 | -4.63 | 0.00  | mmu-miR-98      |
| 223   | 1.00 | 9.84x10 <sup>-1</sup> | -0.02 | -4.63 | -0.04 | mmu-miR-592     |
| 5110  | 1.00 | 9.85x10 <sup>-1</sup> | -0.02 | -4.63 | -0.01 | mghv-miR-M1-2   |
| 7066  | 1.00 | 9.85x10 <sup>-1</sup> | -0.02 | -4.63 | -0.02 | mmu-miR-1904    |
| 9539  | 1.00 | 9.85x10 <sup>-1</sup> | 0.02  | -4.63 | 0.02  | mmu-miR-202-3p  |
| 12330 | 1.00 | 9.85x10 <sup>-1</sup> | 0.02  | -4.63 | 0.02  | mmu-miR-7b      |
| 6379  | 1.00 | 9.86x10 <sup>-1</sup> | 0.02  | -4.63 | 0.01  | mmu-miR-15b     |
| 13871 | 1.00 | 9.86x10 <sup>-1</sup> | 0.02  | -4.63 | 0.01  | mmu-miR-500     |
| 11954 | 1.00 | 9.86x10 <sup>-1</sup> | -0.02 | -4.63 | -0.03 | mmu-miR-499     |
| 9628  | 1.00 | 9.87x10 <sup>-1</sup> | -0.02 | -4.63 | -0.02 | mmu-miR-125a-3p |
| 8920  | 1.00 | 9.87x10 <sup>-1</sup> | -0.02 | -4.63 | 0.00  | mmu-let-7g      |
| 15085 | 1.00 | 9.87x10 <sup>-1</sup> | 0.02  | -4.63 | 0.00  |                 |
| 384   | 1.00 | 9.89x10 <sup>-1</sup> | 0.01  | -4.63 | 0.01  | mmu-miR-128     |
| 7030  | 1.00 | 9.90x10 <sup>-1</sup> | 0.01  | -4.63 | 0.00  | mmu-miR-296-5p  |
| 3714  | 1.00 | 9.90x10 <sup>-1</sup> | 0.01  | -4.63 | 0.00  | mmu-miR-23b     |
| 13474 | 1.00 | 9.90x10 <sup>-1</sup> | -0.01 | -4.63 | -0.02 |                 |
| 13924 | 1.00 | 9.90x10 <sup>-1</sup> | -0.01 | -4.63 | 0.00  | mmu-miR-98      |
| 3487  | 1.00 | 9.91x10 <sup>-1</sup> | -0.01 | -4.63 | -0.01 | mmu-miR-30a     |
| 61    | 1.00 | 9.91x10 <sup>-1</sup> | 0.01  | -4.63 | 0.00  | mmu-miR-107     |
| 10442 | 1.00 | 9.91x10 <sup>-1</sup> | -0.01 | -4.63 | -0.01 | mmu-miR-96      |
| 5596  | 1.00 | 9.92x10 <sup>-1</sup> | 0.01  | -4.63 | 0.01  | mmu-miR-469     |
| 15042 | 1.00 | 9.92x10 <sup>-1</sup> | 0.01  | -4.63 | 0.01  | mmu-miR-365     |
| 7231  | 1.00 | 9.92x10 <sup>-1</sup> | 0.01  | -4.63 | 0.00  | mmu-miR-130a    |
| 15018 | 1.00 | 9.93x10 <sup>-1</sup> | -0.01 | -4.63 | 0.00  | mmu-let-7g      |

|       |      |                       |       |       |      |                 |
|-------|------|-----------------------|-------|-------|------|-----------------|
| 4658  | 1.00 | $9.93 \times 10^{-1}$ | 0.01  | -4.63 | 0.01 | mmu-miR-30c-2*  |
| 7078  | 1.00 | $9.95 \times 10^{-1}$ | -0.01 | -4.63 | 0.00 | mmu-miR-100     |
| 13587 | 1.00 | $9.96 \times 10^{-1}$ | 0.00  | -4.63 | 0.00 | mmu-miR-342-3p  |
| 1744  | 1.00 | $9.97 \times 10^{-1}$ | 0.00  | -4.63 | 0.00 | mmu-miR-465a-3p |
| 13174 | 1.00 | $9.97 \times 10^{-1}$ | 0.00  | -4.63 | 0.00 | mmu-miR-877*    |
| 8598  | 1.00 | $9.98 \times 10^{-1}$ | 0.00  | -4.63 | 0.00 | mmu-miR-378     |
| 15691 | 1.00 | $9.98 \times 10^{-1}$ | 0.00  | -4.63 | 0.00 | mmu-miR-140     |
| 11131 | 1.00 | $9.98 \times 10^{-1}$ | 0.00  | -4.63 | 0.00 | mmu-miR-149     |
| 1878  | 1.00 | $9.99 \times 10^{-1}$ | 0.00  | -4.63 | 0.00 | mmu-miR-107     |
| 4228  | 1.00 | $9.99 \times 10^{-1}$ | 0.00  | -4.63 | 0.00 | mmu-miR-23b     |
| 672   | 1.00 | $9.99 \times 10^{-1}$ | 0.00  | -4.63 | 0.00 | mmu-let-7g      |
| 6513  | 1.00 | $1.00 \times 10^{+0}$ | 0.00  | -4.63 | 0.00 | mmu-miR-720     |

Table SVI. The names of genes commonly predicted as targeted by miRNAs of which expression is stimulated or attenuated by TGF- $\beta$ 1. Total - total number of genes, which expression is potentially regulated by listed miRNAs.

| The names of miRNAs                                           | total | The names of potentially target genes                                                                                                                                                                                                                                                                                                                                                                                                            |
|---------------------------------------------------------------|-------|--------------------------------------------------------------------------------------------------------------------------------------------------------------------------------------------------------------------------------------------------------------------------------------------------------------------------------------------------------------------------------------------------------------------------------------------------|
| miR-125b-5p, miR-155-5p, miR-181a-5p, miR-181b-5p, miR-30c-5p | 2     | QKI, BRWD1                                                                                                                                                                                                                                                                                                                                                                                                                                       |
| miR-125b-5p, miR-155-5p, miR-181a-5p, miR-181b-5p             | 5     | KCNA1, ZC3H12B, MAP3K10, SP1, ETS1                                                                                                                                                                                                                                                                                                                                                                                                               |
| miR-155-5p, miR-181a-5p, miR-181b-5p, miR-30c-5p              | 32    | RTKN2, CHD9, CEP350, CNOT6, PICALM, PAWR, ELAVL2, NFAT5, ZBTB41, RCOR1, PAK7, CHD7, TNPO1, CPEB4, S100BPB, NOVA1, SIRT1, LIN7C, BNC2, MBNL2, MECP2, YOD1, TSGA14, CNTN4, MIER3, KRAS, BRD1, JARID2, NKAIN2, TADA2B, ATP2B1, EIF2C4                                                                                                                                                                                                               |
| miR-125b-5p, miR-181a-5p, miR-181b-5p, miR-30c-5p             | 22    | HIC2, ST8SIA4, BCL2, PIP4K2B, LIN28B, UBE2J1, ADCY1, PRDM1, PHF15, ATXN1, FNDC3B, TMEM135, ZBTB34, CHL1, STC1, MEGF9, EGR3, LIN28, GRB10, NFIB, LIFR, SH2B3                                                                                                                                                                                                                                                                                      |
| miR-155-5p, miR-181a-5p, miR-181b-5p                          | 57    | PCDHAC1, PALLD, PCDHA13, FBXO11, TRIM2, RSPO2, HEXIM1, ACVR2A, KALRN, NR1D2, ZIC3, NR4A3, ARID2, GABRA1, MYBL1, ZNF664, KPNA4, MAP3K7IP2, G3BP2, WDFY3, DDX3Y, MPP5, EN2, XRN1, SOX6, RAP2A, TM9SF3, SMARCAD1, ASTN1, SEPT11, ATP2B3, DTNA, PCDHA6, DNAJB1, CARD11, PCDHA4, ARL5B, RAB11FIP2, FAM135A, PCDHA2, FBXO33, USP9X, ZNF236, PCDHAC2, KPNA1, BTBD3, FOS, CDC73, ACVR2B, ZMYND11, PHF20L1, RNF19A, WNK1, MEX3C, RPS6KA3, RPS6KB1, SPOCK1 |
| miR-125b-5p, miR-181a-5p, miR-181b-5p                         | 53    | KCNMA1, TAF9B, SORT1, IGSF11, LIF, EPHA4, UBE2W, FAM126B, TANC2, NOTCH2, PODXL, SOCS4, ZBTB4, DTX4, ZDHHC7, CCNJ, DAZAP2, CBX7, PI4K2B, C10ORF104, GLS, TLK2, FZD4, ADAM11, RAB8B, KIAA2022, PCGF6, DCLK1, B4GALT1, PHOX2B, MSII, MTF1, ZNF281, SCD, SRGAP2, STAT3, C14ORF43, MADD, SEL1L, PPP1R12B, BMPR2, ZBTB33, NIN, TBC1D1, BAZ2A, ANKRD50, TRIM71, ZC3H11A, LRP4, ETV6, MAMDC2, SRF, SEMA4C                                                |

|                                            |     |                                                                                                                                                                                                                                                                                                                                                                                                                                                                                                                                                                                                                                                                                                                                                                                                                                                                                                                                                                                                                                                                                                                                                                                                                                                                                                                                                                                                                            |
|--------------------------------------------|-----|----------------------------------------------------------------------------------------------------------------------------------------------------------------------------------------------------------------------------------------------------------------------------------------------------------------------------------------------------------------------------------------------------------------------------------------------------------------------------------------------------------------------------------------------------------------------------------------------------------------------------------------------------------------------------------------------------------------------------------------------------------------------------------------------------------------------------------------------------------------------------------------------------------------------------------------------------------------------------------------------------------------------------------------------------------------------------------------------------------------------------------------------------------------------------------------------------------------------------------------------------------------------------------------------------------------------------------------------------------------------------------------------------------------------------|
| miR-181a-5p,<br>miR-181b-5p,<br>miR-30c-5p | 186 | PKNOX2, EPB41L4B, USP47, C7ORF60, EPN2, GDA, HOXA1, OSBPL8, ENOX2, ZIC2, EED, CECR2, BCLAF1, RAD23B, LRRC8D, FRS2, OTUD4, SGK269, PALM2, HLF, HEPHL1, NAALADL2, GOT2, ZC3H6, CCDC6, SLC35F1, MLL3, ITSN1, ATP2B2, IL1A, C14ORF129, CPD, LPPR4, NEGR1, CCNK, COL19A1, ITGA6, TOX, GCNT2, PLCXD3, IRS2, BTBD10, MAP2K4, BCL6, MFAP3L, DOCK4, FIGN, E2F7, WDR82, ADAMTS6, TNRC6B, ZFX, FAM73B, D4S234E, FBXO34, CCDC117, GTF2H1, BIRC6, PPP3R1, EPC2, DMXL2, NLK, PGAP1, CREB1, STAG1, BAZ2B, TUSC3, PHACTR2, PDE5A, FAM179B, CALCR, LYCAT, CACNB2, METAP2, SHOC2, CSNK1G1, ZFAND5, KIAA1024, CHIC1, ACAP2, UNC5D, NRXN3, RNMT, ATRNL1, FAM46C, RNF8, HOXA11, DOCK7, SEC24A, BACH2, CALM1, GIGYF1, PSD3, LPP, FAM178A, MEX3B, DPYSL2, MFSD6, CDH13, TIMP3, YTHDF3, LPGAT1, MARK1, TWF1, CAMK2D, MARCH5, RUNX1, CNR1, PBRM1, GOLGA1, NR3C1, AASDHPPT, CBLB, TMEM47, AFF4, TTLL7, C15ORF29, ARHGEF3, ATG5, EDNRB, TTBK1, SLC38A2, CD2AP, MYH10, ADO, TNKS, ABI3BP, TULP4, PER2, TRIM9, RAPGEF4, UBE2D1, CLOCK, PPP1R2, TBL1X, PAPD5, KIAA0247, DDIT4, NUS1, BCL2L11, CUL5, RAP1B, DIP2B, TRIM13, PCDH19, TBPL1, FAM46A, CALU, PLAG1, DOCK10, GRM5, FNDC3A, ATP8A1, SIX4, TMCC1, C13ORF23, MAP3K7IP3, SFRS7, SERPINE1, DSEL, SEPT8, NCALD, CIT, RAB11A, TMEM30A, ZFH3, SSX2IP, DLGAP2, C5ORF13, BCL11A, PPP2R5E, ROD1, UBE3C, KPNB1, YTHDC1, ADAMTS5, ATP2A2, ONECUT2, GATM, PHTF2, ATP8B1, MAT2A, GRIA2, DNAJC13, ATRN, GOLGA8B |
| miR-155-5p, miR-181a-5p, miR-30c-5p        | 2   | SSH2, PELI1                                                                                                                                                                                                                                                                                                                                                                                                                                                                                                                                                                                                                                                                                                                                                                                                                                                                                                                                                                                                                                                                                                                                                                                                                                                                                                                                                                                                                |
| miR-125b-5p, miR-155-5p, miR-181b-5p       | 1   | RBAK                                                                                                                                                                                                                                                                                                                                                                                                                                                                                                                                                                                                                                                                                                                                                                                                                                                                                                                                                                                                                                                                                                                                                                                                                                                                                                                                                                                                                       |
| miR-125b-5p, miR-181b-5p, miR-30c-5p       | 1   | ADAM9                                                                                                                                                                                                                                                                                                                                                                                                                                                                                                                                                                                                                                                                                                                                                                                                                                                                                                                                                                                                                                                                                                                                                                                                                                                                                                                                                                                                                      |
| miR-125b-5p, miR-155-5p, miR-30c-5p        | 9   | HMGB3, ABL2, ESRRG, SATB2, EIF5A2, TP53INP1, SETD7, SOX11, TRPS1                                                                                                                                                                                                                                                                                                                                                                                                                                                                                                                                                                                                                                                                                                                                                                                                                                                                                                                                                                                                                                                                                                                                                                                                                                                                                                                                                           |

|                             |     |                                                                                                                                                                                                                                                                                                                                                                                                                                                                                                                                                                                                                                                                                                                                                                                                                                                                                                                                                                                                                                                                                                                                                                                                                                                                                                                                                                                                                                                                                                                                                                                                                                                                                                                                                                                                                                                                                                                                                                                                                                                                                                                                                                                                                                                                                                                                                                                                                             |
|-----------------------------|-----|-----------------------------------------------------------------------------------------------------------------------------------------------------------------------------------------------------------------------------------------------------------------------------------------------------------------------------------------------------------------------------------------------------------------------------------------------------------------------------------------------------------------------------------------------------------------------------------------------------------------------------------------------------------------------------------------------------------------------------------------------------------------------------------------------------------------------------------------------------------------------------------------------------------------------------------------------------------------------------------------------------------------------------------------------------------------------------------------------------------------------------------------------------------------------------------------------------------------------------------------------------------------------------------------------------------------------------------------------------------------------------------------------------------------------------------------------------------------------------------------------------------------------------------------------------------------------------------------------------------------------------------------------------------------------------------------------------------------------------------------------------------------------------------------------------------------------------------------------------------------------------------------------------------------------------------------------------------------------------------------------------------------------------------------------------------------------------------------------------------------------------------------------------------------------------------------------------------------------------------------------------------------------------------------------------------------------------------------------------------------------------------------------------------------------------|
| miR-181a-5p,<br>miR-181b-5p | 650 | SLMAP, WASF1, RNF38, KLHL2, SLC10A7, DHX35, HCN1, AQP9, RAB3IP, AGPAT1, MAP3K3, UNC5A, PCSK1, TNS3, LRRN1, EPS8, CCL22, ITGA3, HOOK3, SLK, NOL8, CDC14A, USP6NL, ZFP14, KIAA0528, VGLL3, ZNF83, KIAA2018, RTF1, NEFH, EVI2A, GATA6, CDK8, ING5, RIN2, LCOR, CCAR1, DMRT3, GCC2, HS2ST1, BCHE, KL, PLCL2, DUSP5, ERLIN2, ATP11C, THRB, TSPYL4, USP42, EN1, CDC42BPA, CNOT1, NIPBL, HSF2, SFRS5, GRIK2, ATG10, PHLDA1, WDR20, NEBL, ZNF655, CBFA2T2, PJA2, SLAIN1, NR2C2, RPRD1B, RHOBTB2, SEPT3, PHLPL, CAMSAP1, SERTAD2, NMNAT2, MEGF10, SCHIP1, MAGOHB, SNN, PROX1, KCNK10, RNF182, PDAP1, HOXB5, KIAA0664, FHDC1, MOSPD1, TNF, C17ORF63, BEX2, MTMR12, LDLR, RBM26, SIX2, RABGEF1, LRBA, OSBPL3, HAND2, CREB3, USP9Y, SPP1, XPO4, XIAP, VAX1, THOC7, MKLN1, YTHDC2, ARFGEF2, MAP1A, BHLHB2, TGIF2, LOC387856, C3ORF58, EXOSC3, PDCD6IP, IPO5, KIAA0999, ESR1, DEPDC6, WIF1, MAB21L2, MEGF11, CUL3, FAM160A2, GRM1, FAM122B, ZNF514, PCDHA12, ARHGAP26, ITGB8, GNG2, RNF43, EPB41L3, WSB1, BAT2D1, AHCTF1, ITGA2, NRXN1, TXNDC12, NTS, PCDHA7, POU3F2, PTPN9, ZFAND6, GPD1L, ALS2CR4, DUSP10, MAPK1IP1L, PKP2, CNOT2, KIAA1219, DPP6, METAP1, HMBS, SLC25A24, GPBP1, TCTN3, CACNA2D2, MYO1E, LOC153364, FAM3C, ADARB1, AP1S3, PAM, ADRBK1, ZNF563, YWHAG, NOL4, LRRC32, IGF2BP2, ZIC5, SHE, PCDHA5, SASH1, CDC14B, RLBP1L1, BBS9, ENTPD6, CTNNA1, FAM102A, CBX4, MAPK1, API5, SAMHD1, CDON, MMP14, KIAA0182, SPTY2D1, TNFSF11, TAP2, IPPK, BIVM, CXCL2, ZDHHC3, SLC25A4, CLASP1, PRIMA1, PAPOLG, ZFP36L1, AKAP6, PCNP, TMEM196, TSC22D2, TRAK2, ABHD13, TGFBRAP1, TMEM181, C10ORF78, SLAIN2, GLIS3, TCERG1, TBL1XR1, TOM1L1, APOO, ACSL1, RBBP7, PRDM10, CAMSAP1L1, DNAJC21, USP33, PPP1CB, SYNE1, RSBN1, ADH4, YTHDF2, TARDBP, DHX29, COL16A1, PAN3, PDXDC1, RHOG, HEY1, MTPN, TIMELESS, LRP12, ZFYVE16, SLITRK2, MLL5, CAMTA2, C11ORF30, HOXD3, TRPM3, TMEM64, JARID1A, ZNF594, OR51E2, PURB, PDIA6, BAG4, CA5B, FBXL3, PAK4, GABRG2, ERMN, NCOA2, KIAA0226, PDGFRA, ADM, PLEKHJ1, KLHL5, DLC1, SPRY4, KCNC2, WDR37, USO1, KIAA1128, MED26, AFTPH, HOXC8, LARP4, NSMAF, SLC24A3, NARG1, C2ORF69, RPN2, ZNF207, DOPEY1, LMO1, DCN, BEND3, KIAA0427, WDYHV1, MKRN1, LONRF1, TMEM184C, RABL5, RBM25, INO80, CTTNBP2NL, FSD1L, PPP2R3A, BMP2K, ADAMTSL1, ANKRD43, LPCAT1, CYR61, AKT3, ARL5A, PROCR, BAIAP2, C6ORF192, ARSJ, BAAT, KAT2B, XYLT1, C6ORF62, ZNF440, ZNF280D, SLC19A2, RFX2, ZADH2, ACTR2, PDE3B, LBR, CBFA2T3, |
|-----------------------------|-----|-----------------------------------------------------------------------------------------------------------------------------------------------------------------------------------------------------------------------------------------------------------------------------------------------------------------------------------------------------------------------------------------------------------------------------------------------------------------------------------------------------------------------------------------------------------------------------------------------------------------------------------------------------------------------------------------------------------------------------------------------------------------------------------------------------------------------------------------------------------------------------------------------------------------------------------------------------------------------------------------------------------------------------------------------------------------------------------------------------------------------------------------------------------------------------------------------------------------------------------------------------------------------------------------------------------------------------------------------------------------------------------------------------------------------------------------------------------------------------------------------------------------------------------------------------------------------------------------------------------------------------------------------------------------------------------------------------------------------------------------------------------------------------------------------------------------------------------------------------------------------------------------------------------------------------------------------------------------------------------------------------------------------------------------------------------------------------------------------------------------------------------------------------------------------------------------------------------------------------------------------------------------------------------------------------------------------------------------------------------------------------------------------------------------------------|



|  |                                                                                                                                                                                                                                                                                                                                                                                                                                                                                                                                                                                                                                                                                                                                                                                                                                                                                                                                                                                                                                                                                                                                                                                                                                                                                                                                                                                                                                                                                                                                                                                                                                                                                                                                                                                                                                                                                                                                                                                                                                                                                                                                                                                                                                                                                                                                                                                                    |
|--|----------------------------------------------------------------------------------------------------------------------------------------------------------------------------------------------------------------------------------------------------------------------------------------------------------------------------------------------------------------------------------------------------------------------------------------------------------------------------------------------------------------------------------------------------------------------------------------------------------------------------------------------------------------------------------------------------------------------------------------------------------------------------------------------------------------------------------------------------------------------------------------------------------------------------------------------------------------------------------------------------------------------------------------------------------------------------------------------------------------------------------------------------------------------------------------------------------------------------------------------------------------------------------------------------------------------------------------------------------------------------------------------------------------------------------------------------------------------------------------------------------------------------------------------------------------------------------------------------------------------------------------------------------------------------------------------------------------------------------------------------------------------------------------------------------------------------------------------------------------------------------------------------------------------------------------------------------------------------------------------------------------------------------------------------------------------------------------------------------------------------------------------------------------------------------------------------------------------------------------------------------------------------------------------------------------------------------------------------------------------------------------------------|
|  | <p> CDYL, RLF, ERGIC1, RYR3, KANK1, HECA, PRTG, WASL, ADAMTS18, PTEN, AFF1, AGFG1, ATXN7L1, SENP1, GOLGA8E, SLC25A37, TXNDC15, APIG1, CD4, BAI3, PTPRE, ARL1, FPR3, CALB1, CEP135, PLEK, GTF2E1, AKAP7, LYRM1, ARHGEF7, TMEM127, SAMD12, SCOC, HISPPD1, YIPF4, MPP7, FBN2, PHF3, DCBLD2, CAPZA2, CASP10, MINK1, DNAJA4, ATP11A, PIAS3, ATP1B1, CNKSR3, CDKN1B, TRIM3, MBOAT1, TSPAN8, IPO8, SYNC, SLC2A3, PHC3, RNF34, TNFRSF11B, SECISBP2, PAX9, PI4K2A, MED8, RNF145, DYNC1LI2, NPAT, GDI1, COIL, ARHGEF2, PACS2, SIPA1L2, CDX2, GPR22, C7ORF41, PRDM4, PRKCD, MAPT, ENAH, EGR1, TMEM165, ZIC4, KIAA0196, CPNE2, PUNC, UHMK1, FAM171A1, RNF20, PCDHA11, PIK3R3, KLF6, RNF2, DNAJC7, POLA1, CKS1B, HECW2, EYA1, STEAP4, CAMKK1, ZFHX4, VBP1, SNAP25, MORC3, MAP3K8, ANO1, ZIC1, SPOCK3, PLEKHA3, LMBRD2, C11ORF75, SMAD7, PCDHA9, DKFZP56400823, PEX13, PDPK1, CRISPLD1, ZNF124, PCYOX1, C17ORF39, ATXN3, SLC26A4, TGFBR1, VPS33B, ACVR1C, CRIM1, ATP1B2, NR6A1, PKNOX1, EREG, RNF115, PCGF2, DPY19L2, NAT13, KCNJ10, SELI, E2F5, NMT2, SEMA3B, CREBZF, PER3, CDKL2, GREM1, ITPR2, PRKAG2, ILF3, RP2, UBE2B, JAZF1, LEMD3, HOXD1, ZNF292, SPIN1, HEG1, PDIK1L, LAMC1, GPR88, PBX3, CAMK2G, HMGB2, KIF3B, PRICKLE2, RAN, MTMR9, LMTK2, FOXK1, ETF1, MTX3, SF1, CREBL2, FAM120C, RANBP3, YWHAB, TMSB4Y, TNFAIP1, THAP2, PRKCE, SLC25A25, ACYP1, PHACTR4, ZNF329, GAPVD1, CD163, TBC1D4, OGT, MSL2, PCDHA10, PRDX3, CARM1, CLEC3A, PPARA, CD59, PLDN, PNRC2, PSAP, GPR137C, FRMD8, KCNH8, BPTF, NPEPPS, SENP2, ID4, SOX5, ADAMTS1, PRKG1, PPM1B, UBL3, CAPRIN1, NLN, FNBP4, SEC24C, SYT3, ANKRD13C, SLC9A6, DCUN1D1, MBNL1, IL2, ARRDC3, SRPK2, ABI1, DHX57, VGLL2, IFNG, RALA, ZNF449, IRF5, TET2, SPIRE1, TMEM71, ST8SIA3, SACM1L, RASSF2, MRPS23, HSPC159, CAPRIN2, KIAA0195, RECK, RBM47 TSG101 CEBPG LHX6 RBM22 FBXO41 ANK1 HSP90B1 CDKN2AIP TMEM131 SORD CNTNAP2 TRRAP SLC26A9 SEMA4G DR1 CYLD WSCD2 CEBPA C12ORF64 PCDHA3 SLC12A5 ARL3 MLLT10 GABRA4 CTDSPL PDE11A CYP26B1 SYNPR LMO3 MAP1B SFRS18 ROBO2 CSNK1G3 GAS7 SLITRK1 MEST C12ORF35 PPFIA1 KLF15 PCDHA1 PTBP2 HEY2 CXCL5 GPD2 ZNF800 ZFR QSER1 PCDHA8 RNF125 NPTN EIF4A2 FOXP1 CCDC85A RGMA SUDS3 RAD21 ZNF28 MAP2K1 ZNF654 SS18L1 CLIP1 GP5 UBP1 STC2 TLL1 TMEM132B SETX ZNF326 DERL1 IFT57 ZZZ3 RNF13 CD69 FMNL2 C3ORF59 POM121 TBC1D9 TGFBI DDX3X SCG5 KLHL3 ADCY9 DPP10 TMF1 FKBP1A RFTN2 NPC1 INPP5A PITPNB RASSF1 TMEM106B </p> |
|--|----------------------------------------------------------------------------------------------------------------------------------------------------------------------------------------------------------------------------------------------------------------------------------------------------------------------------------------------------------------------------------------------------------------------------------------------------------------------------------------------------------------------------------------------------------------------------------------------------------------------------------------------------------------------------------------------------------------------------------------------------------------------------------------------------------------------------------------------------------------------------------------------------------------------------------------------------------------------------------------------------------------------------------------------------------------------------------------------------------------------------------------------------------------------------------------------------------------------------------------------------------------------------------------------------------------------------------------------------------------------------------------------------------------------------------------------------------------------------------------------------------------------------------------------------------------------------------------------------------------------------------------------------------------------------------------------------------------------------------------------------------------------------------------------------------------------------------------------------------------------------------------------------------------------------------------------------------------------------------------------------------------------------------------------------------------------------------------------------------------------------------------------------------------------------------------------------------------------------------------------------------------------------------------------------------------------------------------------------------------------------------------------------|

|                             |    |                                                                                              |
|-----------------------------|----|----------------------------------------------------------------------------------------------|
|                             |    | MBOAT2 SIN3B ATMIN NPTXR SEMA3C RNF6 TP63 ANXA11 PUM1<br>CNOT6L ARNT2 KIAA0802 TXNDC10       |
| miR-125b-5p,<br>miR-181a-5p | 4  | KLF3, GGT7, RNF144B, NIPA1                                                                   |
| miR-181a-5p,<br>miR-30c-5p  | 3  | SON, EPB41, RNF169                                                                           |
| miR-155-5p, miR-<br>181b-5p | 3  | ZNF618, C6ORF89, CAB39                                                                       |
| miR-125b-5p,<br>miR-181b-5p | 1  | PAFAH1B1                                                                                     |
| miR-181b-5p,<br>miR-30c-5p  | 12 | PPP1R9A, REEP1, ZDHHC17, STS, GALNT1, ZMYND8, PLS1, SLC1A2,<br>KLF12, STX12, ZFYVE26, KCNMB2 |
| miR-125b-5p,<br>miR-155-5p  | 11 | SEC14L5, TSPAN14, E2F2, APC, ANTXR2, GABRB2, PHC2, CXORF23,<br>HIVEP2, TMEM194A, BCAT1       |

|                         |    |                                                                                                                                                                                                                                                                                                                                                                                                                                                                                                                      |
|-------------------------|----|----------------------------------------------------------------------------------------------------------------------------------------------------------------------------------------------------------------------------------------------------------------------------------------------------------------------------------------------------------------------------------------------------------------------------------------------------------------------------------------------------------------------|
| miR-155-5p, miR-30c-5p  | 65 | LCORL, C21ORF66, HECTD2, SLC6A15, CAMTA1, ABHD2, RGL1, TMEM33, PTPN2, SH3PXD2A, YWHAZ, SCN1A, DIXDC1, UBE2D3, ITK, GLCCI1, SMAD2, RCHY1, SMAD1, CFL2, SOCS1, RUNX2, DET1, GPR85, RAPGEF2, SYPL1, KIF3A, SLC39A10, UST, SGK3, SATB1, HECW1, NUFIP2, TOMM20, MATR3, RAPH1, SOCS6, BDNF, SEMA3A, DDAH1, SLC12A6, SGCB, CUGBP2, DCUN1D3, DHX40, HDAC9, VAPA, EBF3, ZNF644, RND3, C8ORF4, FXR1, PTPRD, ZNF238, MARCH6, USP48, ARID4A, PCDH9, RANBP10, BACH1, HNRNPA3, ARL15, ELL2, VAV3, HIPK1                            |
| miR-125b-5p, miR-30c-5p | 69 | SLC7A6, UBE2G1, PAPOLA, BSN, PHF20, NCOR2, PLXNA1, MEIS2, CPEB3, PHF16, FUT4, DCX, RALGPS1, GRHL1, EAF1, RASGEF1A, DAG1, YES1, DLL4, SYN2, UBN1, CPSF6, FBXL17, RAB22A, C7ORF43, MAN1B1, DAGLA, MAF, C9ORF86, FLJ36031, ANO3, KLF13, DYNLT3, MEF2D, ALPK3, GJA1, NEFM, NRIP1, ZSCAN29, LRFN2, ZBTB7A, GALNT7, USP37, PSTPIP2, COPS7B, IRF4, CFBF, SNX27, SMARCD2, TDG, PLAGL2, ZSWIM5, FAM83F, CECR6, ORC2L, FBXO45, PSMD7, ITGB3, FAM131B, MGEA5, MFHAS1, KPNA6, ZSCAN22, E2F3, ABHD6, CYP24A1, MIB1, RNF44, KLHL24 |
| miR-181a-5p             | 17 | RAG1, GPM6A, MTL5, CCDC126, TBC1D14, ACAD8, VAMP1, CADM2, LTBP2, ORAI1, MTMR10, GJB7, HSPA13, IL6ST, FAT3, ETNK1, NAT12                                                                                                                                                                                                                                                                                                                                                                                              |
| miR-181b-5p             | 42 | WHSC1, CPEB1, PLD1, GMFB, PSMF1, ZNF294, EPS15, EMR2, CHN2, KIAA0232, PDK4, SSX3, KIAA1045, C15ORF26, SLC31A1, TRDMT1, BTBD11, SLC24A4, PDE10A, GPX8, FCRL5, CA3, NAB1, SMG7, DEK, SCN3B, SUSP5, ACTL6A, CACHD1, FAM102B, TMEM217, PTPRT, C1ORF21, SCARB2, DISP2, FAM70A, CDKN3, FAM155B, TIFA, PRKCA, SEC22A, ADIPOQ                                                                                                                                                                                                |

|            |     |                                                                                                                                                                                                                                                                                                                                                                                                                                                                                                                                                                                                                                                                                                                                                                                                                                                                                                                                                                                                                                                                                                                                                                                                                                                                                                                                                                                                                                                                                                                                                                                                                                                                                                                                                                                                                                                          |
|------------|-----|----------------------------------------------------------------------------------------------------------------------------------------------------------------------------------------------------------------------------------------------------------------------------------------------------------------------------------------------------------------------------------------------------------------------------------------------------------------------------------------------------------------------------------------------------------------------------------------------------------------------------------------------------------------------------------------------------------------------------------------------------------------------------------------------------------------------------------------------------------------------------------------------------------------------------------------------------------------------------------------------------------------------------------------------------------------------------------------------------------------------------------------------------------------------------------------------------------------------------------------------------------------------------------------------------------------------------------------------------------------------------------------------------------------------------------------------------------------------------------------------------------------------------------------------------------------------------------------------------------------------------------------------------------------------------------------------------------------------------------------------------------------------------------------------------------------------------------------------------------|
| miR-155-5p | 242 | <p>SALL1, CHD8, MTF, SLC33A1, SPIN2B, NFIA, SFRS1, ACBD3, GNAS, GOLGA3, KIAA1715, FOXE1, PODN, WHSC1L1, ETNK2, MMP16, TRAM1, TAF12, TMEM202, RICTOR, COL7A1, TM6SF1, CNIH, STON1, GFI1, UPP2, CHAF1A, VTI1A, MEIS1, C12ORF36, SLA, JAK2, ANTXR1, LRP1B, HBP1, WNT5A, SEPHS1, MAP4K3, REPS2, FLJ37543, CCND1, PSIP1, KCNN3, SGCZ, STRN3, LUZP2, DMTF1, PDE3A, CTCFL, C10ORF46, TWSG1, FBXO30, WEE1, SMURF2, CARHSP1, HAS3, H3F3A, FEM1C, SPIN2A, F13A1, NAMPT, HDAC4, ENTHD1, SCG2, SPI1, C1QL2, MYLK, RAB6A, NKX3-1, CTLA4, MUT, SMARCA4, SKI, CPA3, ELOVL2, COPS3, SUZ12, RAB34, PSKH1, CLCN3, LIN9, VSTM2A, SOX1, ARFGAP3, MAFB, PKIA, SP3, SLC1A3, NAV3, SHANK2, BAG5, KBTBD2, ZMYM2, EHD1, SPIN3, MPHOSPH9, SH2D4B, OLFML3, N4BP1, TBRG1, PIK3R1, AGPAT5, HOOK1, CD47, SOCS5, BOC, RAB1A, NUDT4, CLDN1, ACTA1, HMGCS1, TLE4, UPF2, SEC61A2, ZNF703, LPIN1, MON1A, INADL, ADNP2, LRAT, WIT1, ETV1, MYO1D, RNF123, RHOBTB1, RCN2, GOLPH3L, TMTC2, ZNF652, DRD1, MYB, RNF135, ZPLD1, C3ORF18, RAC1, EHF, ADD3, ARVCF, IRF2BP2, DACH1, ATF3, GDF6, PGRMC2, ZBTB38, YWHAE, C14ORF147, LSM14A, MAP3K14, AICDA, MEF2A, COL21A1, TCF12, SGIP1, AQP4, ZWILCH, MYO10, ABCD2, PRPF4B, KSR1, MYPN, WWC1, PRKAR1A, CSNK1G2, GLT25D1, JHDM1D, TBC1D20, GCET2, SPRED1, TINAG, CDH6, KIAA1274, STYX, MARCH7, KAT2A, WDFY1, JARID1B, THSD7B, PKN2, C9ORF5, SORCS1, VEZF1, SLC11A2, PHF17, STXBP5L, SDCBP, SLC2A12, NFIX, BCORL1, PEA15, FGF7, RREB1, CBL, CLCN5, PIK3CA, CLINT1, ZNF642, ANKFY1, ZKSCAN5, TSHZ3, FAR1, ABAT, KIAA1333, SLC20A2, SNRPN, C7ORF16, NEUROG2, IKBKE, HIF1A, RELA, TRIM32, ATP6V1G1, LRRC59, DYNC11I1, RAB5C, WTAP, KIAA1468, INPP5D, RAB30, ZNF185, SUFU, UBQLN1, RBMS3, TGFBR2, HERC4, UNC13C, CUX1, CDC42SE2, GPM6B, ST8SIA2, TAPT1, KIAA0430, SEMA5A, CEBPB, GATAD2B, THAP6, CSF1R, KIAA1267, NDFIP1, GOLT1B, ZNF562, ELMOD1, SMAD5</p> |
|------------|-----|----------------------------------------------------------------------------------------------------------------------------------------------------------------------------------------------------------------------------------------------------------------------------------------------------------------------------------------------------------------------------------------------------------------------------------------------------------------------------------------------------------------------------------------------------------------------------------------------------------------------------------------------------------------------------------------------------------------------------------------------------------------------------------------------------------------------------------------------------------------------------------------------------------------------------------------------------------------------------------------------------------------------------------------------------------------------------------------------------------------------------------------------------------------------------------------------------------------------------------------------------------------------------------------------------------------------------------------------------------------------------------------------------------------------------------------------------------------------------------------------------------------------------------------------------------------------------------------------------------------------------------------------------------------------------------------------------------------------------------------------------------------------------------------------------------------------------------------------------------|

|             |     |                                                                                                                                                                                                                                                                                                                                                                                                                                                                                                                                                                                                                                                                                                                                                                                                                                                                                                                                                                                                                                                                                                                                                                                                                                                                                                                                                                                                                                                                                                                                                                                                                                                                                                                                                                                                                                                                                                                                                                                                                                                                                                                                                                                                                                                                                                                                                                                                                                  |
|-------------|-----|----------------------------------------------------------------------------------------------------------------------------------------------------------------------------------------------------------------------------------------------------------------------------------------------------------------------------------------------------------------------------------------------------------------------------------------------------------------------------------------------------------------------------------------------------------------------------------------------------------------------------------------------------------------------------------------------------------------------------------------------------------------------------------------------------------------------------------------------------------------------------------------------------------------------------------------------------------------------------------------------------------------------------------------------------------------------------------------------------------------------------------------------------------------------------------------------------------------------------------------------------------------------------------------------------------------------------------------------------------------------------------------------------------------------------------------------------------------------------------------------------------------------------------------------------------------------------------------------------------------------------------------------------------------------------------------------------------------------------------------------------------------------------------------------------------------------------------------------------------------------------------------------------------------------------------------------------------------------------------------------------------------------------------------------------------------------------------------------------------------------------------------------------------------------------------------------------------------------------------------------------------------------------------------------------------------------------------------------------------------------------------------------------------------------------------|
| miR-125b-5p | 424 | <p>EIF2B5, BTG2, EDN1, NT5DC1, HOMEZ, MSL1, PELI2, PRKRA, ATP5G2, SH3BP4, ANKRD13B, CYTH1, DIRAS1, MSRB3, SLC4A8, SEMA4D, BAK1, PHYHIP, BBC3, TMEM132E, ZFYVE1 OAZ2, MAPKAPK2, LUZP1, FOXK2, PDIA3, ASB13, FAM73A, CORO2A, SLCO2A1, MAPK12, ATOH8, KIAA0100, STARD13, ATP1B4, DNAL4, ESRRA, ZNF395, MAPK10, KIAA0317, CACNB1, IL6R, NEU1, AGGF1, DPF2, TMED9, RBM44, C17ORF59, RBM38, LOXL1, OLFML2A, MICALL1, BRD4, KLHL6, UBTD1, BCKDK, DCTN1, SAMD10, BRCC3, KCNH4, GPATCH8, BAI1, NAB2, LIMD2, MEMO1, SLC38A9, SCN4B, RBM7, SLC39A9, TM9SF4, TMPRSS13, XKRX, IMPAD1, FAM129B, TMEM77, ZBTB47, CDR2L, PSMB8, VEGFA, TRIM14, GRIN2A, SCARF2, C19ORF39, UBE2L3, SMG1, IL13, LFNG, KIF1B, VPS37B, TNFAIP3, TSEN54, KIAA0556, GTPBP2, PRELID2, SLC25A15, SLC26A6, PPP1CA, MMP11, USP38, QSOX2, HMGCR, CGREF1, FOXD2, MDGA1, GPC4, BMF, MKNK2, C1ORF144, MCART6, TSPAN12, RNASEH2C, FOXN3, BRPF1, SH3TC2, ZNF691, PTPRF, C9ORF9, VPS4B, MYEOV, FAM134A, ERBB2, ZNRF3, C6ORF47, ENPEP, BIN2, GABRP, MFN1, ZNF589, ABCC5, MAP2K7, TMBIM6, BMP1, TAZ, IKZF4, RHO2, ERO1LB, EIF4EBP1, DPP9, NAIF1, SSR2, GALNT14, RHOQ, MED15, OSBPL9, PPP2CA, MAPRE2, C19ORF40, EIF2C2, SLC35C1, IL10RA, SHROOM4, ALDH1A3, CCDC21, RAPGEF5, ELOVL1, SPSB4, CLEC2D, RPS6KA1, HCN4, SLC7A1, SEMA4F, ELAVL1, GJC1, CELSR2, ATP10D, USP12, KCNH7, AZI2, RND2, KLC2, MASP1, PCTP, LDB1, DUS1L, TOMM40, TIMM17B, ST6GAL1, NCAN, EIF1AD, ITGA7, IGFBP3, KIAA1602, KIAA1598, TMLHE, ARCN1, LBH, MRPL30, SLC4A4, MAP3K11, LACTB, CSNK2A1, RFC5, EPO, PCSK7, ABTB1, TBC1D8B, KCNS3, FAM176A, MAP3K9, SLC6A17, RYBP, PHF23, BCL2L14, TRIM68, ERBB4, BCL2L12, IER2, APOBEC4, RFX5, PTPN18, FOXQ1, VCIPI1, NRM, IRF1, KCNIP3, KIAA1522, TMEM86A, EPHA2, LNPEP, CACNB3, RASL10B, IHPK1, DICER1, KIAA0323, SGPL1, WDR1, PERLD1, MXD4, CLEC2B, ATP13A3, DEM1, COPZ1, HDDC3, TMEM161B, HOXB3, FAM135B, ZNF81, CYP11B2, CASC3, BCL2L2, PPP2R1B, PAN2, RAPGEFL1, RNF144A, KIAA0174, COL4A3, RET, PRSS35, PARP14, GRSF1, ABCC4, MYT1, PLAGL1, FLOT2, ANKRD42, FBXW4, GP6, DDX42, MAPK14, CDC42SE1, EMID1, LIMA1, TEAD2, SOX30, VANGL2, ZNF76, CRB2, FURIN, GLB1L2, WARS, FGFR2, ADAMTS4, KIAA1244, RAB6B, PPP2R5C, FAM62A, NICN1, PCTK1, ATG4D, FAM53C, ACCN2, SMEK1, GOLGA5, SSTR3, ASPHD1, FAM118A, LYPLA2, TYSND1, NXF1, SCARB1, TRIAP1, TTC7A, SLC17A7, CTF8, PPT1, GOPC, NUMBL, SEMA4B, SULT4A1, MTUS1, HCN3, GAB2, SLITRK6, PRRC1, ACHE, PPP1R3A, MCL1, RFXANK,</p> |
|-------------|-----|----------------------------------------------------------------------------------------------------------------------------------------------------------------------------------------------------------------------------------------------------------------------------------------------------------------------------------------------------------------------------------------------------------------------------------------------------------------------------------------------------------------------------------------------------------------------------------------------------------------------------------------------------------------------------------------------------------------------------------------------------------------------------------------------------------------------------------------------------------------------------------------------------------------------------------------------------------------------------------------------------------------------------------------------------------------------------------------------------------------------------------------------------------------------------------------------------------------------------------------------------------------------------------------------------------------------------------------------------------------------------------------------------------------------------------------------------------------------------------------------------------------------------------------------------------------------------------------------------------------------------------------------------------------------------------------------------------------------------------------------------------------------------------------------------------------------------------------------------------------------------------------------------------------------------------------------------------------------------------------------------------------------------------------------------------------------------------------------------------------------------------------------------------------------------------------------------------------------------------------------------------------------------------------------------------------------------------------------------------------------------------------------------------------------------------|

|  |  |                                                                                                                                                                                                                                                                                                                                                                                                                                                                                                                                                                                                                                                                                                                                                                                                                                                                                           |
|--|--|-------------------------------------------------------------------------------------------------------------------------------------------------------------------------------------------------------------------------------------------------------------------------------------------------------------------------------------------------------------------------------------------------------------------------------------------------------------------------------------------------------------------------------------------------------------------------------------------------------------------------------------------------------------------------------------------------------------------------------------------------------------------------------------------------------------------------------------------------------------------------------------------|
|  |  | M6PR, C9ORF150, PVRL2, TEF, SUV420H2, NUP210, SLC4A10, LYPD6, MRPL43, VDR, SLC35A4, CCDC149, CD34, DNAJC14, CNNM1, FUT1, SMC2, ZC3H7B, VPS37C, TBX4, DVL3, SERTAD3, EBF4, HRH3, UVRAG, SMURF1, TNFSF4, SH3BP5L, DUSP6, ELK1, UBE2R2, FAM65B, MIZF, WIPF2, SUV39H1, TRIM7, TAT, FMNL3, CYGB, PPME1, RAB3D, MUL1, FAM116A, ENTPD4, HTATIP2, ELOVL6, ASB6, SPTB, BRSK2, ABHD3, C11ORF57, TGOLN2, TMEM177, EDEM1, ANPEP, BAP1, RIT1, HIF1AN, NECAB3, MLF2, RUSC2, ARID3B, ARHGEF1, PPAT, TMEM198, IL16, RNF40, PPP1R16B, RNF121, IER3IP1, BRPF3, NEDD9, CAMKV, RBM8A, ITGA9, LL22NC03-75B3.6, ENPP1, SCNN1A, SGSM2, CCR5, HEMK1, SNRPB, ULK3, CGN, BMPR1B, SYVN1, HIATL1, FAM160B2, ZNF828, PTGS1, KCTD21, HOXD9, DOCK3, ZNF385A, HOXC6, CDKN2A, SCN2B, CASP2, NPL, MTMR3, TMEM168, AMELY, APPL1, IL2RB, GCNT1, CDH5, GGA2, TRIB2, ADD2, NDRG3, SCN5A, LANCL1, FCHSD1, ST18, OSBPL5, TRAPPC6B |
|--|--|-------------------------------------------------------------------------------------------------------------------------------------------------------------------------------------------------------------------------------------------------------------------------------------------------------------------------------------------------------------------------------------------------------------------------------------------------------------------------------------------------------------------------------------------------------------------------------------------------------------------------------------------------------------------------------------------------------------------------------------------------------------------------------------------------------------------------------------------------------------------------------------------|

|            |     |                                                                                                                                                                                                                                                                                                                                                                                                                                                                                                                                                                                                                                                                                                                                                                                                                                                                                                                                                                                                                                                                                                                                                                                                                                                                                                                                                                                                                                                                                                                                                                                                                                                                                                                                                                                                                                                                                                                                                                                                                                                                                                                                                                                                                                                                                                                                                                                                                      |
|------------|-----|----------------------------------------------------------------------------------------------------------------------------------------------------------------------------------------------------------------------------------------------------------------------------------------------------------------------------------------------------------------------------------------------------------------------------------------------------------------------------------------------------------------------------------------------------------------------------------------------------------------------------------------------------------------------------------------------------------------------------------------------------------------------------------------------------------------------------------------------------------------------------------------------------------------------------------------------------------------------------------------------------------------------------------------------------------------------------------------------------------------------------------------------------------------------------------------------------------------------------------------------------------------------------------------------------------------------------------------------------------------------------------------------------------------------------------------------------------------------------------------------------------------------------------------------------------------------------------------------------------------------------------------------------------------------------------------------------------------------------------------------------------------------------------------------------------------------------------------------------------------------------------------------------------------------------------------------------------------------------------------------------------------------------------------------------------------------------------------------------------------------------------------------------------------------------------------------------------------------------------------------------------------------------------------------------------------------------------------------------------------------------------------------------------------------|
| miR-30c-5p | 746 | <p>ITGA5, MGMT1, NAGPA, ADAM12, ITPK1, GALNT3, UBAC1, ERG, CCDC97, SLC16A14, NR4A2, RWDD4A, CXORF39, SCYL3, SNX33, CHD1, SLC25A14, KIAA1949, FAHD1, ELOVL5, ARL4A, HERC2, KIAA1033, PCGF3, SDAD1, SNX16, PARP16, KPNA3, PPP3CA, GFPT2, PPIL4, CCNY, GRAMD2, CEP170, VAT1L, CCDC43, MFSD11, SLC6A6, CHFR, TNXB, OTUD6B, ADAM19, ADRA2A, SEC23IP, TASP1, EDNRA, SNX6, ZBTB11, IRS1, DLGAP4, ACTC1, KIAA0355, INO80D, SUV39H2, C13ORF18, NCAM1, CSDA, ARL6IP6, UBXN7, RARB, PRRG1, CARS, AHNAK, ZNF711, PPP1R12A, CHMP2B, DGKD, SORBS2, PGM2L1, GNAO1, RAB38, SCN3A, NUA1, RRAD, PPARGC1A, SNAI1, SOX9, CUL4B, PITX1, PDGFRB, ADRB1, CELSR3, HOXB8, FLJ45983, ASAP1, PDSS1, NEDD4L, NHLH2, YPEL5, ZNF649, RIMBP2, FAM160B1, DNAJC16, RNF7, PGM1, CSMD3, KLHL28, TANK, RCAN1, FBXL20, SPAG9, C1ORF174, RAB15, ICA1L, BDP1, NF1, FAM49A, NEFL, GALNT2, ANKRD17, ELF1, DNMT3A, NT5E, NCK2, HNF4G, EIF2C3, PGGT1B, PLEKHO2, GIGYF2, CALB2, TMOD2, ALG9, HERC3, MXRA5, PDE4D, PAPD4, ELL, PIK3CD, SLC7A11, PITPNM2, PPM1E, VAT1, SLC5A3, CHST2, WDR26, FRMD4A, BCL11B, SOCS3, GLCE, GPR124, KLF9, PYROXD1, TSPAN2, RIPK5, FAM91A1, SP4, RAB4B, GNA13, AMOTL2, FAM104A, WWP1, IHPK3, GCLC, CBX2, MAN1A2, SSBP2, C19ORF50, LPHN3, SETD3, GPR110, STK39, NR2F2, SPAST, FHOD3, RPS6KA2, SMAP1AVL9, FOXG1, BNC1, ZNF608, SLC22A5, SEPT7, C9ORF72, ABCC9, YBX1, MCF2L, NR3C2, NPAS2, VPS26B, EMCN, CACNA1C, DOC2A, DCTN4, GRM3, TRPM7, ODZ3, HTR4, ANO4, SLC22A23, PIK3C2B, PPP3CB, USP15, PTGER2, VKORC1L1, SFXN1, CNTD1, YAF2, MIER2, IRX4, SLC30A8, TSC1, TNRC4, SBF1, TNRC6A, TACC1, RAD9B, PDCL, STIM2, SNX18, PCDH20, RASL12, MAML1, PIP4K2A, ZNF706, UNC5C, RNF146, NECAP1, CSGALNACT1, C14ORF28, CCPG1, SORCS3, PDGFA, ANKHD1, PDP2, KIAA1370, C12ORF30, GCOM1, GBP1, WDR7, MEOX2, EML4, FKBP3, AP1B1, LIPG, UBE2O, RPRD1A, KCNJ12, ACVR1, ESCO1, PIK3R2, ABL1, VIP, CCNE2, MKL2, ELMO1, DIO2, MTDH, MAP3K12, SEMA6D, LMBR1L, IER5, KCNJ3, CMTM4, RBM5, WDR44, NID2, GLDC, EXTL2, FUCA1, ALS2CR8, RAB32, CAMK4, STAU1, FGF5, BAHD1, LYSMD3, GAS2, ERLIN1, NTNG1, MTA1, SBK1, TFAP2A, PGR, INTS2, ZNF507, TMED10, MBNL3, PCDH17, RFX6, TMEM87A, NADK, MCF2, KTEL1, P4HA1, AZIN1, ADAMTS3, ZDHHC21, NHS, GLI2, MAFG, MNT, CBX3, ZCCHC2, KIAA1211, PTGFRN, KCTD8, SAPS3, NEUROD6, CAT, ZNF746, MIS12, CTRL, MARCH4, C3ORF57, TBC1D15, RASA1, JMJD1A, BNIP3L, GABRA5, LCP1, STXBP1, FRMPD1, TET1, DMD, KLHL20, NFYB, FZD3,</p> |
|------------|-----|----------------------------------------------------------------------------------------------------------------------------------------------------------------------------------------------------------------------------------------------------------------------------------------------------------------------------------------------------------------------------------------------------------------------------------------------------------------------------------------------------------------------------------------------------------------------------------------------------------------------------------------------------------------------------------------------------------------------------------------------------------------------------------------------------------------------------------------------------------------------------------------------------------------------------------------------------------------------------------------------------------------------------------------------------------------------------------------------------------------------------------------------------------------------------------------------------------------------------------------------------------------------------------------------------------------------------------------------------------------------------------------------------------------------------------------------------------------------------------------------------------------------------------------------------------------------------------------------------------------------------------------------------------------------------------------------------------------------------------------------------------------------------------------------------------------------------------------------------------------------------------------------------------------------------------------------------------------------------------------------------------------------------------------------------------------------------------------------------------------------------------------------------------------------------------------------------------------------------------------------------------------------------------------------------------------------------------------------------------------------------------------------------------------------|

|  |                                                                                                                                                                                                                                                                                                                                                                                                                                                                                                                                                                                                                                                                                                                                                                                                                                                                                                                                                                                                                                                                                                                                                                                                                                                                                                                                                                                                                                                                                                                                                                                                                                                                                                                                                                                                                                                                                                                                                                                                                                                                                                                                                                                                                                                                                                                                                                                                                                                                        |
|--|------------------------------------------------------------------------------------------------------------------------------------------------------------------------------------------------------------------------------------------------------------------------------------------------------------------------------------------------------------------------------------------------------------------------------------------------------------------------------------------------------------------------------------------------------------------------------------------------------------------------------------------------------------------------------------------------------------------------------------------------------------------------------------------------------------------------------------------------------------------------------------------------------------------------------------------------------------------------------------------------------------------------------------------------------------------------------------------------------------------------------------------------------------------------------------------------------------------------------------------------------------------------------------------------------------------------------------------------------------------------------------------------------------------------------------------------------------------------------------------------------------------------------------------------------------------------------------------------------------------------------------------------------------------------------------------------------------------------------------------------------------------------------------------------------------------------------------------------------------------------------------------------------------------------------------------------------------------------------------------------------------------------------------------------------------------------------------------------------------------------------------------------------------------------------------------------------------------------------------------------------------------------------------------------------------------------------------------------------------------------------------------------------------------------------------------------------------------------|
|  | <p>RAP2C, ASXL1, IDH1, CFDP1, DLG5, BMI1, SH3RF1, MICAL1, MIA3, SPHKAP, CPE, WIPF1, PIP5K1B, IGF2R, RFFL, CALD1, RBM15B, RAB10, SOBP, SH3GL2, IL28RA, SUCLG2, UCP3, DEXI, ACTN1, IFNAR2, R3HDM1, NRBF2, SEMA6B, RSF1, KCTD3, JDP2, NKX2-2, ERFFI1, STX6, B4GALT5, NRK, SEPT6, ME1, ZFY, PPARGC1B, EPHB2, OMG, EEA1, C13ORF15, MAB21L1, EDEM3, FAM13A1, NDEL1, ARID1A, ARL8B, FLVCR2, ZBTB40, COL12A1, MAST3, YPEL2, SLC6A3, EYA2, C4ORF19, AFF3, B3GNT5, HIVEP1, SLC5A11, RNF122, ANKRA2, RCBTB1, CTNND2, TAF4B, TUBGCP3, POU4F2, TIA1, FAM109A, KLF11, SOX4, PTPDC1, EPDR1, NRP1, ATAD2B, GNAI2, CLN8, ASCC3, MAP3K5, STX2, FUBP3, STAG2, SYNGR3, EML1, C1ORF135, CTDSPL2, TRDN, TBX5, UBE2F, PLCG1, MLL, RTN4R, NEDD4, NEK4, ZNF148, UBE2I, RP5-1022P6.2, CHST1, GAN, HDAC5, LMLN, REEP3, GNPDA1, EDC3, JAKMIP2, ARID3A, WDR43, STOML1, ARF4, MYH9, LRRC17, ZPBP2, FAM152A, MYEF2, ADAMTS9, BCL9, MAGI3, FAM40A, MARCH8, CNGB3, RAI14, KIF16B, NRP2, ACP2, FREQ, ARID5B, ARL4C, ACTR1A, GALR1, EVI5, CXCL11, MYBL2, ASB3, SNX10, NUPL1, DBF4, MTPP, KCTD5, PPTC7, GRHL2, STOX2, FOXJ2, SSR3, ZCCHC24, PFN2, RRAS2, LEPR, ARPC5, CDC37L1, NRBP1, CCDC120, LARGE, AP2A1, GABRB1, TLL2, SUB1, AKAP10, LYST, SOX12, ARL10, SMARCA5, FRMD6, DGKZ, TCP11L1, RAB23, GOLGA8A, CADPS, CLDND1, REV3L, B4GALT6, DOLPP1, SUPT3H, RHEBL1, ZNF518A, GM2A, UBA3, MYH11, NSL1, PLEKHA7, STX7, MYO5A, C4ORF34, SPEN, REV1, OXR1, TSPAN33, LHX8, PDS5B, SETD5, SNX2, SLC30A4, NEUROD1, USP45, JPH4, KIAA2026, CYR1, IL1RAP, TXNDC5, CCNJL, RALGDS, TMED2, PRUNE2, ADRB2, SLC4A7, COL25A1, SLC7A10, CAMK2N1, DDX46, BCOR, NTRK3, CCNT2, SLC35F3, JOSD1, ZBTB39, ELMOD2, CSNK1A1, ARRDC4, CHKA, RNF138, SEH1L, KCTD9, ZBTB6, FAF2, ZRANB2, CLTC, ZNF521, PDCD10, RAP2B, COL13A1, PTAR1, SNAPIN, CDC7, FAM123B, SEMA6A, GMEB2, HNRNPC, RNF165, ZCCHC14, TGDS, CASP3, ICK, EIF2C1, GZF1, WDR47, XPR1, PRPF40A, SEC23A, CPNE8, DACH2, JAG2, GLT8D3, RGS2, PTPRK, FOXP4, UHRF1BP1, IL1RAPL2, EPHA3, P4HA2, RBM12, INSIG2, PRKRIR, RNF220, IKZF2, MARCKS, SACS, C20ORF108, PLXNA2, IL2RA, FAP, CAPZA1, SCARA5, PRG4, A2BP1, STX17, LYN, USP6, AFAP1L2, NAP1L3, SLC36A1, CPEB2, PHF6, PCGF5, DGKI, ADRA2B, MBD6, PIGA, KREMEN1, LRCH2, TFDPI, DENND1B, SLC35D3, MAGI2, MAP3K2, LEPROTL1, ZFC3H1, PTPN21, HSPA5, LIMCH1, JUNB, SCN2A, XPO1, RHOB, SAP30, PEX3, CA10, AP3M1, CEP76, LGI1, NR5A2, NECAB1, IGF1R, CPNE3, SNX30, NLGN1, NAV1, PCDH10, MSI2, LRRC40, THBS2, DCP2, POLR1D, VAMP3,</p> |
|--|------------------------------------------------------------------------------------------------------------------------------------------------------------------------------------------------------------------------------------------------------------------------------------------------------------------------------------------------------------------------------------------------------------------------------------------------------------------------------------------------------------------------------------------------------------------------------------------------------------------------------------------------------------------------------------------------------------------------------------------------------------------------------------------------------------------------------------------------------------------------------------------------------------------------------------------------------------------------------------------------------------------------------------------------------------------------------------------------------------------------------------------------------------------------------------------------------------------------------------------------------------------------------------------------------------------------------------------------------------------------------------------------------------------------------------------------------------------------------------------------------------------------------------------------------------------------------------------------------------------------------------------------------------------------------------------------------------------------------------------------------------------------------------------------------------------------------------------------------------------------------------------------------------------------------------------------------------------------------------------------------------------------------------------------------------------------------------------------------------------------------------------------------------------------------------------------------------------------------------------------------------------------------------------------------------------------------------------------------------------------------------------------------------------------------------------------------------------------|



|  |  |                                                                                                                                                                                                                                                                                                                                                                                                                                                                                                                                                                                                                                                                                                                                                                                                       |
|--|--|-------------------------------------------------------------------------------------------------------------------------------------------------------------------------------------------------------------------------------------------------------------------------------------------------------------------------------------------------------------------------------------------------------------------------------------------------------------------------------------------------------------------------------------------------------------------------------------------------------------------------------------------------------------------------------------------------------------------------------------------------------------------------------------------------------|
|  |  | C22ORF28, FRK, CDC2L6, RASD1, SCAMP1, SLC41A2, PRLR, AP3S1, FAM43A, ZNF280B, MSH2, ZEB2, STK35, CAPN5, TMEM121, SAP30BP, MKRN3, SLC30A5, RARG, ARHGEF6, LRRFIP2, RGS6, SRGAP3, TBC1D10B, PHF13, AMOTL1, MTSS1, MMD, KCTD7, C10ORF76, SNX1, PDS5A, CUL2, JAK1, SLC39A11, BTBD7, VANGL1, KIAA1328, FRZB, SLC6A9, TMEFF1, GPR125, KIAA1804, STAC, SCN8A, EFNA3, CAMKK2, SLC9A8, PAX3, PON2, C2ORF55, ZBTB44, PTP4A1, PPP1R14C, FOXD1, KITLG, ARID4B, UBE2V2, BECN1, GPT2, ADAM22, MAP4K4, PRICKLE1, FOXO3, KLF10, PSME3, RFX7, FAM110B, PRRT2, PNN, ESPN, FAM81A, UBE2D2, AR, SNAI2, CRKL, PLXDC1, AP4E1, TAOK1, KIF3C, EPB41L5, SLC38A7, CLCF1, FGD6, USP44, GOLGA4, NOTCH1, PTPN13, PPP4R4, PAPOLB, URM1, IL7, SCN9A, DPY19L1, LMBR1, C10ORF26, DACT1, CAMK2N2, ELAVL3, HLX, ZNRF1, PNKD, RAB7A, RAB8A |
|--|--|-------------------------------------------------------------------------------------------------------------------------------------------------------------------------------------------------------------------------------------------------------------------------------------------------------------------------------------------------------------------------------------------------------------------------------------------------------------------------------------------------------------------------------------------------------------------------------------------------------------------------------------------------------------------------------------------------------------------------------------------------------------------------------------------------------|

Table SVII. TGF-B\_signaling\_pathway.

| Target Gene | Gene Description                                                       | The number of miRNAs potentially targeting listed genes |
|-------------|------------------------------------------------------------------------|---------------------------------------------------------|
| ACVR1       | activin A receptor, type I                                             | 1                                                       |
| ACVR1C      | activin A receptor, type IC                                            | 2                                                       |
| ACVR2A      | activin A receptor, type IIA                                           | 3                                                       |
| ACVR2B      | activin A receptor, type IIB                                           | 3                                                       |
| BMPR1B      | bone morphogenetic protein receptor, type IB                           | 1                                                       |
| BMPR2       | bone morphogenetic protein receptor, type II (serine/threonine kinase) | 3                                                       |
| DCN         | decorin                                                                | 2                                                       |
| E2F5        | E2F transcription factor 5, p130-binding                               | 2                                                       |
| GDF6        | growth differentiation factor 6                                        | 1                                                       |
| ID1         | inhibitor of DNA binding 1, dominant negative helix-loop-helix protein | 1                                                       |
| ID2         | inhibitor of DNA binding 2, dominant negative helix-loop-helix protein | 1                                                       |
| ID3         | inhibitor of DNA binding 3, dominant negative helix-loop-helix protein | 1                                                       |
| ID4         | inhibitor of DNA binding 4, dominant negative helix-loop-helix protein | 2                                                       |
| IFNG        | interferon, gamma                                                      | 2                                                       |
| MAPK1       | mitogen-activated protein kinase 1                                     | 2                                                       |
| PPP2CA      | protein phosphatase 2, catalytic subunit, alpha isozyme                | 1                                                       |
| PPP2R1B     | protein phosphatase 2, regulatory subunit A, beta                      | 1                                                       |
| RHOA        | ras homolog family member A                                            | 1                                                       |
| RPS6KB1     | ribosomal protein S6 kinase, 70kDa, polypeptide 1                      | 3                                                       |
| SMAD1       | SMAD family member 1                                                   | 2                                                       |
| SMAD2       | SMAD family member 2                                                   | 2                                                       |
| SMAD5       | SMAD family member 5                                                   | 1                                                       |
| SMAD7       | SMAD family member 7                                                   | 2                                                       |
| SMURF1      | SMAD specific E3 ubiquitin protein ligase 1                            | 1                                                       |
| SMURF2      | SMAD specific E3 ubiquitin protein ligase 2                            | 1                                                       |

|         |                                                         |   |
|---------|---------------------------------------------------------|---|
| SP1     | Sp1 transcription factor                                | 4 |
| TFDP1   | transcription factor Dp-1                               | 1 |
| TGFBR1  | transforming growth factor, beta receptor 1             | 2 |
| TGFBR2  | transforming growth factor, beta receptor II (70/80kDa) | 1 |
| THBS2   | thrombospondin 2                                        | 1 |
| TNF     | tumor necrosis factor                                   | 2 |
| ZFYVE16 | zinc finger, FYVE domain containing 16                  | 2 |

Table SVIII. Pathways in cancer.

| Target Gene | Gene description                                                                        | The number of miRNAs potentially targeting listed genes |
|-------------|-----------------------------------------------------------------------------------------|---------------------------------------------------------|
| ABL1        | c-abl oncogene 1, non-receptor tyrosine kinase                                          | 1                                                       |
| AKT3        | v-akt murine thymoma viral oncogene homolog 3                                           | 2                                                       |
| APC         | adenomatous polyposis coli                                                              | 2                                                       |
| APPL1       | adaptor protein, phosphotyrosine interaction, PH domain and leucine zipper containing 1 | 1                                                       |
| AR          | androgen receptor                                                                       | 1                                                       |
| ARNT2       | aryl-hydrocarbon receptor nuclear translocator 2                                        | 2                                                       |
| BCL2        | B-cell CLL/lymphoma 2                                                                   | 4                                                       |
| CASP3       | caspase 3, apoptosis-related cysteine peptidase                                         | 1                                                       |
| CBL         | Cbl proto-oncogene, E3 ubiquitin protein ligase                                         | 1                                                       |
| CBLB        | Cbl proto-oncogene B, E3 ubiquitin protein ligase                                       | 3                                                       |
| CCDC6       | coiled-coil domain containing 6                                                         | 3                                                       |
| CCND1       | cyclin D1                                                                               | 1                                                       |
| CCNE2       | cyclin E2                                                                               | 1                                                       |
| CDK6        | cyclin-dependent kinase 6                                                               | 1                                                       |
| CDKN1B      | cyclin-dependent kinase inhibitor 1B (p27, Kip1)                                        | 2                                                       |
| CDKN2A      | cyclin-dependent kinase inhibitor 2A                                                    | 1                                                       |
| CEBPA       | CCAAT/enhancer binding protein (C/EBP), alpha                                           | 2                                                       |
| CKS1B       | CDC28 protein kinase regulatory subunit 1B                                              | 2                                                       |
| CRKL        | v-crk avian sarcoma virus CT10 oncogene homolog-like                                    | 1                                                       |
| CSF1R       | colony stimulating factor 1 receptor                                                    | 1                                                       |
| CTNNA1      | catenin (cadherin-associated protein), alpha 1, 102kDa                                  | 2                                                       |
| CUL2        | cullin 2                                                                                | 1                                                       |
| DVL3        | dishevelled segment polarity protein 3                                                  | 1                                                       |
| E2F2        | E2F transcription factor 2                                                              | 2                                                       |
| E2F3        | E2F transcription factor 3                                                              | 2                                                       |
| ERBB2       | v-erb-b2 avian erythroblastic leukemia viral oncogene homolog 2                         | 1                                                       |
| ETS1        | v-ets avian erythroblastosis virus E26 oncogene homolog 1                               | 4                                                       |
| FADD        | Fas (TNFRSF6)-associated via death domain                                               | 1                                                       |
| FGF5        | fibroblast growth factor 5                                                              | 1                                                       |

|         |                                                                                         |   |
|---------|-----------------------------------------------------------------------------------------|---|
| FGF7    | fibroblast growth factor 7                                                              | 1 |
| FGFR2   | fibroblast growth factor receptor 2                                                     | 1 |
| FOS     | FBJ murine osteosarcoma viral oncogene homolog                                          | 3 |
| FZD3    | frizzled family receptor 3                                                              | 1 |
| FZD4    | frizzled family receptor 4                                                              | 3 |
| GLI2    | GLI family zinc finger 2                                                                | 1 |
| HIF1A   | hypoxia inducible factor 1, alpha subunit (basic helix-loop-helix transcription factor) | 1 |
| HSP90B1 | heat shock protein 90kDa beta (Grp94), member 1                                         | 2 |
| IGF1R   | insulin-like growth factor 1 receptor                                                   | 1 |
| ITGA2   | integrin, alpha 2 (CD49B, alpha 2 subunit of VLA-2 receptor)                            | 2 |
| ITGA3   | integrin, alpha 3 (antigen CD49C, alpha 3 subunit of VLA-3 receptor)                    | 2 |
| ITGA6   | integrin, alpha 6                                                                       | 3 |
| JAK1    | Janus kinase 1                                                                          | 1 |
| KITLG   | KIT ligand                                                                              | 1 |
| KRAS    | Kirsten rat sarcoma viral oncogene homolog                                              | 4 |
| LAMC1   | laminin, gamma 1 (formerly LAMB2)                                                       | 2 |
| MAP2K1  | mitogen-activated protein kinase kinase 1                                               | 2 |
| MAPK1   | mitogen-activated protein kinase 1                                                      | 2 |
| MAPK10  | mitogen-activated protein kinase 10                                                     | 1 |
| MITF    | microphthalmia-associated transcription factor                                          | 1 |
| MSH2    | mutS homolog 2                                                                          | 1 |
| NKX3-1  | NK3 homeobox 1                                                                          | 1 |
| PDGFA   | platelet-derived growth factor alpha polypeptide                                        | 1 |
| PDGFRA  | platelet-derived growth factor receptor, alpha polypeptide                              | 2 |
| PDGFRB  | platelet-derived growth factor receptor, beta polypeptide                               | 1 |
| PIAS3   | protein inhibitor of activated STAT, 3                                                  | 2 |
| PIK3CA  | phosphatidylinositol-4,5-bisphosphate 3-kinase, catalytic subunit alpha                 | 1 |
| PIK3CD  | phosphatidylinositol-4,5-bisphosphate 3-kinase, catalytic subunit delta                 | 1 |
| PIK3R1  | phosphoinositide-3-kinase, regulatory subunit 1 (alpha)                                 | 1 |
| PIK3R2  | phosphoinositide-3-kinase, regulatory subunit 2 (beta)                                  | 1 |

|        |                                                                                         |   |
|--------|-----------------------------------------------------------------------------------------|---|
| PIK3R3 | phosphoinositide-3-kinase, regulatory subunit 3 (gamma)                                 | 2 |
| PLCG1  | phospholipase C, gamma 1                                                                | 1 |
| PLD1   | phospholipase D1, phosphatidylcholine-specific                                          | 2 |
| PRKCA  | protein kinase C, alpha                                                                 | 2 |
| PTEN   | phosphatase and tensin homolog                                                          | 2 |
| RAC1   | ras-related C3 botulinum toxin substrate 1 (rho family, small GTP binding protein Rac1) | 1 |
| RALA   | v-ral simian leukemia viral oncogene homolog A (ras related)                            | 2 |
| RALGDS | ral guanine nucleotide dissociation stimulator                                          | 1 |
| RARB   | retinoic acid receptor, beta                                                            | 1 |
| RASSF1 | Ras association (RalGDS/AF-6) domain family member 1                                    | 2 |
| RELA   | v-rel avian reticuloendotheliosis viral oncogene homolog A                              | 1 |
| RET    | ret proto-oncogene                                                                      | 1 |
| RHOA   | ras homolog family member A                                                             | 1 |
| RUNX1  | runt-related transcription factor 1                                                     | 3 |
| SMAD2  | SMAD family member 2                                                                    | 2 |
| SMO    | smoothened, frizzled family receptor                                                    | 1 |
| SPI1   | spleen focus forming virus (SFFV) proviral integration oncogene                         | 1 |
| STAT3  | signal transducer and activator of transcription 3 (acute-phase response factor)        | 3 |
| SUFU   | suppressor of fused homolog (Drosophila)                                                | 1 |
| TGFBR1 | transforming growth factor, beta receptor 1                                             | 2 |
| TGFBR2 | transforming growth factor, beta receptor II (70/80kDa)                                 | 1 |
| VEGFA  | vascular endothelial growth factor A                                                    | 1 |
| WNT5A  | wingless-type MMTV integration site family, member 5A                                   | 1 |
| XIAP   | X-linked inhibitor of apoptosis                                                         | 2 |

Table SIX. ERBB signalling pathway.

| Target gene | Gene description                                                        | The number of miRNAs potentially targeting listed genes |
|-------------|-------------------------------------------------------------------------|---------------------------------------------------------|
| ABL1        | c-abl oncogene 1, non-receptor tyrosine kinase                          | 1                                                       |
| ABL2        | c-abl oncogene 2, non-receptor tyrosine kinase                          | 3                                                       |
| AKT3        | v-akt murine thymoma viral oncogene homolog 3                           | 2                                                       |
| CAMK2D      | calcium/calmodulin-dependent protein kinase II delta                    | 3                                                       |
| CAMK2G      | calcium/calmodulin-dependent protein kinase II gamma                    | 2                                                       |
| CBL         | Cbl proto-oncogene, E3 ubiquitin protein ligase                         | 1                                                       |
| CBLB        | Cbl proto-oncogene B, E3 ubiquitin protein ligase                       | 3                                                       |
| CDKN1B      | cyclin-dependent kinase inhibitor 1B (p27, Kip1)                        | 2                                                       |
| CRKL        | v-crkl avian sarcoma virus CT10 oncogene homolog-like                   | 1                                                       |
| EIF4EBP1    | eukaryotic translation initiation factor 4E binding protein 1           | 1                                                       |
| ELK1        | ELK1, member of ETS oncogene family                                     | 1                                                       |
| ERBB2       | v-erb-b2 avian erythroblastic leukemia viral oncogene homolog 2         | 1                                                       |
| ERBB3       | v-erb-b2 avian erythroblastic leukemia viral oncogene homolog 3         | 1                                                       |
| ERBB4       | v-erb-b2 avian erythroblastic leukemia viral oncogene homolog 4         | 1                                                       |
| EREG        | epiregulin                                                              | 2                                                       |
| KRAS        | Kirsten rat sarcoma viral oncogene homolog                              | 4                                                       |
| MAP2K1      | mitogen-activated protein kinase kinase 1                               | 2                                                       |
| MAP2K4      | mitogen-activated protein kinase kinase 4                               | 3                                                       |
| MAP2K7      | mitogen-activated protein kinase kinase 7                               | 1                                                       |
| MAPK1       | mitogen-activated protein kinase 1                                      | 2                                                       |
| MAPK10      | mitogen-activated protein kinase 10                                     | 1                                                       |
| NCK2        | NCK adaptor protein 2                                                   | 1                                                       |
| PAK4        | p21 protein (Cdc42/Rac)-activated kinase 4                              | 2                                                       |
| PAK7        | p21 protein (Cdc42/Rac)-activated kinase 7                              | 4                                                       |
| PIK3CA      | phosphatidylinositol-4,5-bisphosphate 3-kinase, catalytic subunit alpha | 1                                                       |
| PIK3CD      | phosphatidylinositol-4,5-bisphosphate 3-kinase, catalytic subunit delta | 1                                                       |
| PIK3R1      | phosphoinositide-3-kinase, regulatory subunit 1 (alpha)                 | 1                                                       |

|         |                                                         |   |
|---------|---------------------------------------------------------|---|
| PIK3R2  | phosphoinositide-3-kinase, regulatory subunit 2 (beta)  | 1 |
| PIK3R3  | phosphoinositide-3-kinase, regulatory subunit 3 (gamma) | 2 |
| PLCG1   | phospholipase C, gamma 1                                | 1 |
| PRKCA   | protein kinase C, alpha                                 | 1 |
| RPS6KB1 | ribosomal protein S6 kinase, 70kDa, polypeptide 1       | 3 |



Table SX. MAPK signalling pathway.

| <b>Target gene</b> | <b>Gene description</b>                                      | <b>The number of miRNAs potentially targeting listed genes</b> |
|--------------------|--------------------------------------------------------------|----------------------------------------------------------------|
| AKT3               | v-akt murine thymoma viral oncogene homolog 3                | 2                                                              |
| BDNF               | brain-derived neurotrophic factor                            | 2                                                              |
| CACNA1C            | calcium channel, voltage-dependent, L type, alpha 1C subunit | 1                                                              |
| CACNA2D2           | calcium channel, voltage-dependent, alpha 2/delta subunit 2  | 2                                                              |
| CACNB1             | calcium channel, voltage-dependent, beta 1 subunit           | 1                                                              |
| CACNB2             | calcium channel, voltage-dependent, beta 2 subunit           | 3                                                              |
| CACNB3             | calcium channel, voltage-dependent, beta 3 subunit           | 1                                                              |
| CASP3              | caspase 3, apoptosis-related cysteine peptidase              | 1                                                              |
| CRKL               | v-crk avian sarcoma virus CT10 oncogene homolog-like         | 1                                                              |
| DUSP10             | dual specificity phosphatase 10                              | 2                                                              |
| DUSP5              | dual specificity phosphatase 5                               | 2                                                              |
| DUSP6              | dual specificity phosphatase 6                               | 1                                                              |
| ELK1               | ELK1, member of ETS oncogene family                          | 1                                                              |
| FGF5               | fibroblast growth factor 5                                   | 1                                                              |
| FGF7               | fibroblast growth factor 7                                   | 1                                                              |
| FGFR2              | fibroblast growth factor receptor 2                          | 1                                                              |
| FOS                | FBJ murine osteosarcoma viral oncogene homolog               | 3                                                              |
| IL1A               | interleukin 1, alpha                                         | 3                                                              |
| KRAS               | Kirsten rat sarcoma viral oncogene homolog                   | 4                                                              |
| MAP2K1             | mitogen-activated protein kinase kinase 1                    | 2                                                              |
| MAP2K4             | mitogen-activated protein kinase kinase 4                    | 3                                                              |
| MAP2K7             | mitogen-activated protein kinase kinase 7                    | 1                                                              |
| MAP3K10            | mitogen-activated protein kinase kinase kinase 10            | 4                                                              |
| MAP3K11            | mitogen-activated protein kinase kinase kinase 11            | 1                                                              |
| MAP3K12            | mitogen-activated protein kinase kinase kinase 12            | 1                                                              |
| MAP3K14            | mitogen-activated protein kinase kinase kinase 14            | 1                                                              |
| MAP3K2             | mitogen-activated protein kinase kinase kinase 2             | 1                                                              |
| MAP3K3             | mitogen-activated protein kinase kinase kinase 3             | 2                                                              |
| MAP3K5             | mitogen-activated protein kinase kinase kinase 5             | 1                                                              |

|           |                                                                                         |   |
|-----------|-----------------------------------------------------------------------------------------|---|
| MAP3K7IP2 |                                                                                         | 3 |
| MAP3K8    | mitogen-activated protein kinase kinase kinase 8                                        | 2 |
| MAP3K9    | mitogen-activated protein kinase kinase kinase 9                                        | 1 |
| MAP4K3    | mitogen-activated protein kinase kinase kinase kinase 3                                 | 1 |
| MAP4K4    | mitogen-activated protein kinase kinase kinase kinase 4                                 | 1 |
| MAPK1     | mitogen-activated protein kinase 1                                                      | 2 |
| MAPK10    | mitogen-activated protein kinase 10                                                     | 1 |
| MAPK12    | mitogen-activated protein kinase 12                                                     | 1 |
| MAPK14    | mitogen-activated protein kinase 14                                                     | 1 |
| MAPKAPK2  | mitogen-activated protein kinase-activated protein kinase 2                             | 1 |
| MAPT      | microtubule-associated protein tau                                                      | 2 |
| MKNK2     | MAP kinase interacting serine/threonine kinase 2                                        | 1 |
| NF1       | neurofibromin 1                                                                         | 1 |
| NLK       | nemo-like kinase                                                                        | 3 |
| PDGFA     | platelet-derived growth factor alpha polypeptide                                        | 1 |
| PDGFRA    | platelet-derived growth factor receptor, alpha polypeptide                              | 2 |
| PDGFRB    | platelet-derived growth factor receptor, beta polypeptide                               | 1 |
| PPM1B     | protein phosphatase, Mg <sup>2+</sup> /Mn <sup>2+</sup> dependent, 1B                   | 2 |
| PPP3CA    | protein phosphatase 3, catalytic subunit, alpha isozyme                                 | 1 |
| PPP3CB    | protein phosphatase 3, catalytic subunit, beta isozyme                                  | 1 |
| PPP3R1    | protein phosphatase 3, regulatory subunit B, alpha                                      | 3 |
| PRKCA     | protein kinase C, alpha                                                                 | 1 |
| RAC1      | ras-related C3 botulinum toxin substrate 1 (rho family, small GTP binding protein Rac1) | 1 |
| RAP1B     | RAP1B, member of RAS oncogene family                                                    | 3 |
| RAPGEF2   | Rap guanine nucleotide exchange factor (GEF) 2                                          | 2 |
| RASA1     | RAS p21 protein activator (GTPase activating protein) 1                                 | 1 |
| RELA      | v-rel avian reticuloendotheliosis viral oncogene homolog A                              | 1 |
| RPS6KA1   | ribosomal protein S6 kinase, 90kDa, polypeptide 1                                       | 1 |
| RPS6KA2   | ribosomal protein S6 kinase, 90kDa, polypeptide 2                                       | 1 |
| RPS6KA3   | ribosomal protein S6 kinase, 90kDa, polypeptide 3                                       | 3 |
| RRAS2     | related RAS viral (r-ras) oncogene homolog 2                                            | 1 |
| SRF       | serum response factor (c-fos serum response element-                                    | 3 |

|        | binding transcription factor)                           |   |
|--------|---------------------------------------------------------|---|
| TAOK1  | TAO kinase 1                                            | 1 |
| TGFBR1 | transforming growth factor, beta receptor 1             | 2 |
| TGFBR2 | transforming growth factor, beta receptor II (70/80kDa) | 1 |
| TNF    | tumor necrosis factor                                   | 2 |

Table SXI. Regulation of actin cytoskeleton.

| Target gene | Gene description                                                     | The number of miRNAs potentially targeting listed genes |
|-------------|----------------------------------------------------------------------|---------------------------------------------------------|
| ACTN1       | actinin, alpha 1                                                     | 1                                                       |
| APC         | adenomatous polyposis coli                                           | 2                                                       |
| ARHGEF1     | Rho guanine nucleotide exchange factor (GEF) 1                       | 1                                                       |
| ARHGEF6     | Rac/Cdc42 guanine nucleotide exchange factor (GEF) 6                 | 1                                                       |
| ARHGEF7     | Rho guanine nucleotide exchange factor (GEF) 7                       | 2                                                       |
| ARPC5       | actin related protein 2/3 complex, subunit 5, 16kDa                  | 1                                                       |
| BAIAP2      | BAI1-associated protein 2                                            | 2                                                       |
| CFL2        | cofilin 2 (muscle)                                                   | 2                                                       |
| CRKL        | v-crk avian sarcoma virus CT10 oncogene homolog-like                 | 1                                                       |
| ENAH        | enabled homolog (Drosophila)                                         | 2                                                       |
| FGF5        | fibroblast growth factor 5                                           | 1                                                       |
| FGF7        | fibroblast growth factor 7                                           | 1                                                       |
| FGFR2       | fibroblast growth factor receptor 2                                  | 1                                                       |
| GNA13       | guanine nucleotide binding protein (G protein), alpha 13             | 1                                                       |
| ITGA2       | integrin, alpha 2 (CD49B, alpha 2 subunit of VLA-2 receptor)         | 2                                                       |
| ITGA3       | integrin, alpha 3 (antigen CD49C, alpha 3 subunit of VLA-3 receptor) | 2                                                       |
| ITGA5       | integrin, alpha 5 (fibronectin receptor, alpha polypeptide)          | 1                                                       |
| ITGA6       | integrin, alpha 6                                                    | 3                                                       |
| ITGA7       | integrin, alpha 7                                                    | 1                                                       |
| ITGA9       | integrin, alpha 9                                                    | 1                                                       |
| ITGB3       | integrin, beta 3 (platelet glycoprotein IIIa, antigen CD61)          | 2                                                       |
| ITGB8       | integrin, beta 8                                                     | 2                                                       |
| KRAS        | Kirsten rat sarcoma viral oncogene homolog                           | 4                                                       |
| MAP2K1      | mitogen-activated protein kinase kinase 1                            | 2                                                       |
| MAPK1       | mitogen-activated protein kinase 1                                   | 2                                                       |
| MYH10       | myosin, heavy chain 10, non-muscle                                   | 3                                                       |
| MYH9        | myosin, heavy chain 9, non-muscle                                    | 1                                                       |
| MYLK        | myosin light chain kinase                                            | 1                                                       |
| PAK4        | p21 protein (Cdc42/Rac)-activated kinase 4                           | 2                                                       |

|          |                                                                                         |   |
|----------|-----------------------------------------------------------------------------------------|---|
| PAK7     | p21 protein (Cdc42/Rac)-activated kinase 7                                              | 4 |
| PDGFA    | platelet-derived growth factor alpha polypeptide                                        | 1 |
| PDGFRA   | platelet-derived growth factor receptor, alpha polypeptide                              | 2 |
| PDGFRB   | platelet-derived growth factor receptor, beta polypeptide                               | 1 |
| PFN2     | profilin 2                                                                              | 1 |
| PIK3CA   | phosphatidylinositol-4,5-bisphosphate 3-kinase, catalytic subunit alpha                 | 1 |
| PIK3CD   | phosphatidylinositol-4,5-bisphosphate 3-kinase, catalytic subunit delta                 | 1 |
| PIK3R1   | phosphoinositide-3-kinase, regulatory subunit 1 (alpha)                                 | 1 |
| PIK3R2   | phosphoinositide-3-kinase, regulatory subunit 2 (beta)                                  | 1 |
| PIK3R3   | phosphoinositide-3-kinase, regulatory subunit 3 (gamma)                                 | 2 |
| PIP4K2A  | phosphatidylinositol-5-phosphate 4-kinase, type II, alpha                               | 1 |
| PIP4K2B  | phosphatidylinositol-5-phosphate 4-kinase, type II, beta                                | 4 |
| PIP5K1B  | phosphatidylinositol-4-phosphate 5-kinase, type I, beta                                 | 1 |
| PPP1CA   | protein phosphatase 1, catalytic subunit, alpha isozyme                                 | 1 |
| PPP1CB   | protein phosphatase 1, catalytic subunit, beta isozyme                                  | 2 |
| PPP1R12A | protein phosphatase 1, regulatory subunit 12A                                           | 1 |
| RAC1     | ras-related C3 botulinum toxin substrate 1 (rho family, small GTP binding protein Rac1) | 1 |
| RHOA     | ras homolog family member A                                                             | 1 |
| RRAS2    | related RAS viral (r-ras) oncogene homolog 2                                            | 1 |
| SSH2     | slingshot protein phosphatase 2                                                         | 3 |
| TMSB4Y   | thymosin beta 4, Y-linked                                                               | 2 |
| VAV3     | vav 3 guanine nucleotide exchange factor                                                | 2 |
| WASF1    | WAS protein family, member 1                                                            | 2 |
| WASL     | Wiskott-Aldrich syndrome-like                                                           | 2 |

Table SXII. MTOR signalling pathway.

| Target gene | Gene description                                                                        | The number of miRNAs potentially targeting listed genes |
|-------------|-----------------------------------------------------------------------------------------|---------------------------------------------------------|
| AKT3        | v-akt murine thymoma viral oncogene homolog 3                                           | 2                                                       |
| CAB39       | calcium binding protein 39                                                              | 2                                                       |
| DDIT4       | DNA-damage-inducible transcript 4                                                       | 3                                                       |
| EIF4EBP1    | eukaryotic translation initiation factor 4E binding protein 1                           | 1                                                       |
| HIF1A       | hypoxia inducible factor 1, alpha subunit (basic helix-loop-helix transcription factor) | 1                                                       |
| MAPK1       | mitogen-activated protein kinase 1                                                      | 2                                                       |
| PDPK1       | 3-phosphoinositide dependent protein kinase-1                                           | 2                                                       |
| PIK3CA      | phosphatidylinositol-4,5-bisphosphate 3-kinase, catalytic subunit alpha                 | 1                                                       |
| PIK3CD      | phosphatidylinositol-4,5-bisphosphate 3-kinase, catalytic subunit delta                 | 1                                                       |
| PIK3R1      | phosphoinositide-3-kinase, regulatory subunit 1 (alpha)                                 | 1                                                       |
| PIK3R2      | phosphoinositide-3-kinase, regulatory subunit 2 (beta)                                  | 1                                                       |
| PIK3R3      | phosphoinositide-3-kinase, regulatory subunit 3 (gamma)                                 | 2                                                       |
| RICTOR      | RPTOR independent companion of MTOR, complex 2                                          | 1                                                       |
| RPS6KA1     | ribosomal protein S6 kinase, 90kDa, polypeptide 1                                       | 1                                                       |
| RPS6KA2     | ribosomal protein S6 kinase, 90kDa, polypeptide 2                                       | 1                                                       |
| RPS6KA3     | ribosomal protein S6 kinase, 90kDa, polypeptide 3                                       | 3                                                       |
| RPS6KB1     | ribosomal protein S6 kinase, 70kDa, polypeptide 1                                       | 3                                                       |
| TSC1        | tuberous sclerosis 1                                                                    | 1                                                       |
| ULK3        | unc-51 like kinase 3                                                                    | 1                                                       |
| VEGFA       | vascular endothelial growth factor A                                                    | 1                                                       |

Table SXIII. Renal cell carcinoma pathway.

| Target gene | Gene description                                                                        | The number of miRNAs potentially targeting listed genes |
|-------------|-----------------------------------------------------------------------------------------|---------------------------------------------------------|
| AKT3        | v-akt murine thymoma viral oncogene homolog 3                                           | 2                                                       |
| ARNT2       | aryl-hydrocarbon receptor nuclear translocator 2                                        | 2                                                       |
| CRKL        | v-crk avian sarcoma virus CT10 oncogene homolog-like                                    | 1                                                       |
| CUL2        | cullin 2                                                                                | 1                                                       |
| ETS1        | v-ets avian erythroblastosis virus E26 oncogene homolog 1                               | 4                                                       |
| HIF1A       | hypoxia inducible factor 1, alpha subunit (basic helix-loop-helix transcription factor) | 1                                                       |
| KRAS        | Kirsten rat sarcoma viral oncogene homolog                                              | 4                                                       |
| MAP2K1      | mitogen-activated protein kinase kinase 1                                               | 2                                                       |
| MAPK1       | mitogen-activated protein kinase 1                                                      | 2                                                       |
| PAK4        | p21 protein (Cdc42/Rac)-activated kinase 4                                              | 2                                                       |
| PAK7        | p21 protein (Cdc42/Rac)-activated kinase 7                                              | 4                                                       |
| PIK3CA      | phosphatidylinositol-4,5-bisphosphate 3-kinase, catalytic subunit alpha                 | 1                                                       |
| PIK3CD      | phosphatidylinositol-4,5-bisphosphate 3-kinase, catalytic subunit delta                 | 1                                                       |
| PIK3R1      | phosphoinositide-3-kinase, regulatory subunit 1 (alpha)                                 | 1                                                       |
| PIK3R2      | phosphoinositide-3-kinase, regulatory subunit 2 (beta)                                  | 1                                                       |
| PIK3R3      | phosphoinositide-3-kinase, regulatory subunit 3 (gamma)                                 | 2                                                       |
| RAC1        | ras-related C3 botulinum toxin substrate 1 (rho family, small GTP binding protein Rac1) | 1                                                       |
| RAP1B       | RAP1B, member of RAS oncogene family                                                    | 3                                                       |
| VEGFA       | vascular endothelial growth factor A                                                    | 1                                                       |

Table SXIV. Summary of genes selection for further analysis.

| Target gene | Number of binding miRNA | TCGA Encori mRNA |                       | Encori survival | Log-Rank P-value      | CPTAC Ualcan protein           |                        | TGFB1 vs gene coexpression Encori |                            |
|-------------|-------------------------|------------------|-----------------------|-----------------|-----------------------|--------------------------------|------------------------|-----------------------------------|----------------------------|
|             |                         | Fold change      | P-value               | HR              |                       | Changes                        | P-value                | coefficient-R                     | P-value                    |
| ABL2        | 3                       | 1.74             | 2.7x10 <sup>-15</sup> | 1.07            | 0.68 (ns)             | upregulated in tumor samples   | 1.44x10 <sup>-6</sup>  | 0.41                              | 3.83x10 <sup>-23</sup>     |
| ACVR1C      | 2                       | 0.62             | 4.0x10 <sup>-19</sup> | 1.46            | 1.40x10 <sup>-2</sup> | no data                        | no data                | -0.22                             | 3.18x10 <sup>-7</sup>      |
| ACVR2A      | 3                       | 0.73             | 4.7x10 <sup>-14</sup> | 0.40            | 2.60x10 <sup>-8</sup> | no data                        | no data                | -0.03                             | 5.11x10 <sup>-1</sup> (ns) |
| ACVR2B      | 3                       | 0.81             | 7.4x10 <sup>-7</sup>  | 0.63            | 3.10x10 <sup>-3</sup> | no data                        | no data                | -0.04                             | 3.98x10 <sup>-1</sup> (ns) |
| AKT3        | 2                       | 1.0              | 0.1                   | 0.50            | 1.20x10 <sup>-5</sup> | upregulated in tumor samples   | 1.53x10 <sup>-8</sup>  | 0.10                              | 2.80x10 <sup>-2</sup>      |
| APC         | 2                       | 0.95             | 0.02                  | 0.43            | 1.10x10 <sup>-7</sup> | no changes                     | 7.7x10 <sup>-1</sup>   | 0.04                              | 4.17x10 <sup>-1</sup> (ns) |
| ARHGEF7     | 2                       | 1.63             | 4.0x10 <sup>-20</sup> | 0.78            | 0.11 (ns)             | upregulated in tumor samples   | 2.63x10 <sup>-45</sup> | 0.12                              | 4.60x10 <sup>-3</sup>      |
| ARNT2       | 2                       | 0.29             | 9.2x10 <sup>-37</sup> | 0.79            | 0.14 (ns)             | downregulated in tumor samples | 1.59x10 <sup>-2</sup>  | 0.04                              | 4.23x10 <sup>-1</sup> (ns) |
| BAIAP2      | 2                       | 0.79             | 6.0x10 <sup>-7</sup>  | 0.83            | 0.24 (ns)             | downregulated in tumor samples | 1.72x10 <sup>-56</sup> | 0.07                              | 9.87x10 <sup>-2</sup> (ns) |
| BCL2        | 4                       | 1.69             | 4.4x10 <sup>-6</sup>  | 0.48            | 3.5x10 <sup>-6</sup>  | upregulated in tumor samples   | 3.34x10 <sup>-17</sup> | -0.10                             | 2.39x10 <sup>-2</sup>      |
| BDNF        | 2                       | 4.19             | 1.0x10 <sup>-11</sup> | 0.77            | 0.083 (ns)            | no data                        | no data                | 0.11                              | 1.02x10 <sup>-2</sup>      |
| BMPR2       | 3                       | 0.89             | 2.10x10 <sup>-3</sup> | 0.46            | 8.8x10 <sup>-7</sup>  | upregulated in tumor samples   | 1.03x10 <sup>-4</sup>  | 0.14                              | 1.61x10 <sup>-3</sup>      |
| CAB39       | 2                       | 0.58             | 3.5x10 <sup>-38</sup> | 0.65            | 4.70x10 <sup>-3</sup> | downregulated in tumor samples | 4.71x10 <sup>-50</sup> | -0.11                             | 9.65x10 <sup>-3</sup>      |
| CACNA2D2    | 2                       | 0.21             | 1.9x10 <sup>-79</sup> | 0.72            | 3.60x10 <sup>-2</sup> | no data                        | no data                | -0.01                             | 8.85x10 <sup>-1</sup> (ns) |
| CACNB2      | 3                       | 1.24             | 0.33                  | 0.78            | 0.11 (ns)             | no data                        | no data                | -0.14                             | 1.19x10 <sup>-3</sup>      |
| CAMK2D      | 3                       | 1.22             | 2.30x10 <sup>-3</sup> | 0.71            | 2.70x10 <sup>-2</sup> | upregulated in tumor samples   | 9.78x10 <sup>-6</sup>  | -0.12                             | 6.42x10 <sup>-3</sup>      |
| CAMK2G      | 2                       | 0.76             | 6.6x10 <sup>-11</sup> | 0.95            | 0.71 (ns)             | downregulated in tumor samples | 1.03x10 <sup>-39</sup> | 0.26                              | 7.79x10 <sup>-10</sup>     |
| CBLB        | 3                       | 1.77             | 3.4x10 <sup>-25</sup> | 0.85            | 0.3 (ns)              | upregulated in tumor samples   | 9.43x10 <sup>-14</sup> | 0.27                              | 2.49x10 <sup>-10</sup>     |



|         |   |       |                       |      |                       |                                |                        |       |                            |
|---------|---|-------|-----------------------|------|-----------------------|--------------------------------|------------------------|-------|----------------------------|
| CCDC6   | 3 | 1.0   | 0.52                  | 0.61 | 1.50x10 <sup>-3</sup> | upregulated in tumor samples   | 1.13x10 <sup>-6</sup>  | -0.06 | 1.69x10 <sup>-1</sup> (ns) |
| CDKN1B  | 2 | 1.24  | 7.20x10 <sup>-4</sup> | 0.61 | 1.60x10 <sup>-3</sup> | no changes                     | 5.35x10 <sup>-1</sup>  | 0.19  | 8.74x10 <sup>-6</sup>      |
| CEBPA   | 2 | 2.82  | 1.6x10 <sup>-16</sup> | 1.01 | 0.95 (ns)             | upregulated in tumor samples   | 2.8x10 <sup>-7</sup>   | 0.14  | 9.55x10 <sup>-4</sup>      |
| CFL2    | 2 | 0.97  | 0.02                  | 0.72 | 3.30x10 <sup>-2</sup> | upregulated in tumor samples   | 2.25x10 <sup>-6</sup>  | -0.18 | 3.28x10 <sup>-5</sup>      |
| CKS1B   | 2 | 1.52  | 5.0x10 <sup>-11</sup> | 0.98 | 0.91 (ns)             | upregulated in tumor samples   | 2.15x10 <sup>-24</sup> | 0.30  | 6.19x10 <sup>-13</sup>     |
| CTNNA1  | 2 | 0.92  | 4.20x10 <sup>-3</sup> | 0.48 | 3.90x10 <sup>-6</sup> | downregulated in tumor samples | 2.88x10 <sup>-32</sup> | 0.10  | 2.53x10 <sup>-2</sup>      |
| DCN     | 2 | 0.17  | 3.0x10 <sup>-35</sup> | 1.37 | 4.40x10 <sup>-2</sup> | downregulated in tumor samples | 7.04x10 <sup>-15</sup> | 0.29  | 1.96x10 <sup>-11</sup>     |
| DDIT4   | 3 | 4.49  | 6.6x10 <sup>-51</sup> | 1.17 | 0.32 (ns)             | no data                        | no data                | 0.50  | 9.48x10 <sup>-36</sup>     |
| DUSP10  | 2 | 2.61  | 1.0x10 <sup>-30</sup> | 1.17 | 0.3 (ns)              | no data                        | no data                | 0.27  | 3.07x10 <sup>-10</sup>     |
| DUSP5   | 2 | 0.65  | 1.10x10 <sup>-4</sup> | 1.11 | 0.49 (ns)             | no data                        | no data                | 0.23  | 7.32x10 <sup>-8</sup>      |
| E2F2    | 2 | 4.69  | 1.2x10 <sup>-70</sup> | 1.64 | 1.50x10 <sup>-3</sup> | no data                        | no data                | 0.28  | 2.71x10 <sup>-11</sup>     |
| E2F3    | 2 | 1.19  | 8.6x10 <sup>-6</sup>  | 1.22 | 0.2 (ns)              | downregulated in tumor samples | 2.14x10 <sup>-2</sup>  | 0.11  | 1.05x10 <sup>-2</sup>      |
| E2F5    | 2 | 0.88  | 5.9x10 <sup>-5</sup>  | 1.69 | 7.40x10 <sup>-4</sup> | no data                        | no data                | -0.15 | 3.94x10 <sup>-4</sup>      |
| ENAH    | 2 | 1.03  | 0.98                  | 1.12 | 0.46 (ns)             | no changes                     | 4.46e-01               | 0.17  | 5.76x10 <sup>-5</sup>      |
| EREG    | 2 | 0.77  | 0.99                  | 2.10 | 2.9x10 <sup>-6</sup>  | no data                        | no data                | 0.09  | 3.09x10 <sup>-2</sup>      |
| ETS1    | 4 | 2.29  | 1.7x10 <sup>-17</sup> | 0.54 | 7.7x10 <sup>-5</sup>  | upregulated in tumor samples   | 3.56x10 <sup>-23</sup> | 0.37  | 1.01x10 <sup>-18</sup>     |
| FOS     | 3 | 0.63  | 2.0x10 <sup>-6</sup>  | 0.96 | 0.77 (ns)             | no changes                     | 1.19x10 <sup>-1</sup>  | 0.23  | 9.90x10 <sup>-8</sup>      |
| FZD4    | 3 | 1.51  | 1.50x10 <sup>-4</sup> | 0.44 | 4.4x10 <sup>-7</sup>  | no changes                     | 3.78x10 <sup>-1</sup>  | 0.12  | 6.45x10 <sup>-3</sup>      |
| HSP90B1 | 2 | 1.31  | 6.9x10 <sup>-7</sup>  | 1.20 | 0.25 (ns)             | upregulated in tumor samples   | 6.13x10 <sup>-23</sup> | 0.24  | 1.43x10 <sup>-8</sup>      |
| ID4     | 2 | 0.76  | 9.8x10 <sup>-6</sup>  | 0.74 | 0.057 (ns)            | no data                        | no data                | 0.01  | 7.97x10 <sup>-1</sup> (ns) |
| IFNG    | 2 | 17.83 | 8.9x10 <sup>-34</sup> | 1.43 | 2.30x10 <sup>-2</sup> | no data                        | no data                | 0.16  | 2.32x10 <sup>-4</sup>      |

|           |   |         |                       |         |                       |                                |                        |         |                            |
|-----------|---|---------|-----------------------|---------|-----------------------|--------------------------------|------------------------|---------|----------------------------|
| IL1A      | 3 | 0.68    | 8.00x10 <sup>-3</sup> | 1.40    | 3.10x10 <sup>-2</sup> | no data                        | no data                | -0.08   | 5.87x10 <sup>-2</sup> (ns) |
| ITGA2     | 2 | 0.55    | 2.8x10 <sup>-17</sup> | 0.57    | 3.10x10 <sup>-4</sup> | downregulated in tumor samples | 7.90x10 <sup>-9</sup>  | 0.24    | 1.32x10 <sup>-8</sup>      |
| ITGA3     | 2 | 1.50    | 4.30x10 <sup>-4</sup> | 1.09    | 0.59 (ns)             | upregulated in tumor samples   | 8.21x10 <sup>-7</sup>  | 0.39    | 1.50x10 <sup>-20</sup>     |
| ITGA6     | 3 | 1.29    | 0.15                  | 0.42    | 9x10 <sup>-8</sup>    | downregulated in tumor samples | 2.21x10 <sup>-3</sup>  | -0.18   | 3.45x10 <sup>-5</sup>      |
| ITGB3     | 2 | 0.56    | 2.8x10 <sup>-13</sup> | 0.81    | 0.18 (ns)             | downregulated in tumor samples | 6.05x10 <sup>-3</sup>  | 0.26    | 1.14x10 <sup>-9</sup>      |
| ITGB8     | 2 | 0.83    | 1.6x10 <sup>-5</sup>  | 0.70    | 1.90x10 <sup>-2</sup> | no changes                     | 6.61x10 <sup>-2</sup>  | -0.08   | 8.09x10 <sup>-2</sup> (ns) |
| KRAS      | 4 | 0.88    | 2.10x10 <sup>-4</sup> | 0.60    | 8.80x10 <sup>-4</sup> | downregulated in tumor samples | 4.72x10 <sup>-15</sup> | -0.21   | 1.57x10 <sup>-6</sup>      |
| LAMC1     | 2 | 1.54    | 4.1x10 <sup>-10</sup> | 0.62    | 2.10x10 <sup>-3</sup> | upregulated in tumor samples   | 1.44x10 <sup>-16</sup> | 0.37    | 2.60x10 <sup>-18</sup>     |
| MAP2K1    | 2 | 0.98    | 0.25                  | 0.80    | 0.15 (ns)             | upregulated in tumor samples   | 4.4x10 <sup>-26</sup>  | 0.13    | 3.27x10 <sup>-3</sup>      |
| MAP2K4    | 3 | 0.86    | 1.3x10 <sup>-6</sup>  | 0.65    | 5.60x10 <sup>-3</sup> | downregulated in tumor samples | 1.43x10 <sup>-6</sup>  | -0.06   | 1.37x10 <sup>-1</sup> (ns) |
| MAP3K10   | 4 | 1.16    | 9.70x10 <sup>-2</sup> | 1.43    | 2.00x10 <sup>-2</sup> | no data                        | no data                | 0.31    | 1.55x10 <sup>-13</sup>     |
| MAP3K3    | 2 | 0.85    | 3.5x10 <sup>-6</sup>  | 0.83    | 0.23 (ns)             | upregulated in tumor samples   | 2.02x10 <sup>-27</sup> | 0.30    | 7.67x10 <sup>-13</sup>     |
| MAP3K7IP2 | 3 | no data | no data               | no data | no data               | no data                        | no data                | no data | no data                    |
| MAP3K8    | 2 | 1.76    | 3.5x10 <sup>-11</sup> | 1.83    | 1.20x <sup>-4</sup>   | no data                        | no data                | 0.10    | 1.59x10 <sup>-2</sup>      |
| MAPK1     | 2 | 1.12    | 0.23                  | 0.50    | 7.40x <sup>-6</sup>   | upregulated in tumor samples   | 1.53x10 <sup>-44</sup> | 0.02    | 7.10x10 <sup>-1</sup> (ns) |
| MAPT      | 2 | 1.76    | 1.4x10 <sup>-8</sup>  | 0.47    | 1.80x <sup>-6</sup>   | downregulated in tumor samples | 6.37x10 <sup>-3</sup>  | -0.04   | 3.33x10 <sup>-1</sup> (ns) |
| MYH10     | 3 | 0.30    | 2.6x10 <sup>-44</sup> | 0.61    | 2.00x10 <sup>-3</sup> | downregulated in tumor samples | 2.9x10 <sup>-36</sup>  | 0.07    | 1.29x10 <sup>-1</sup> (ns) |
| NLK       | 3 | 0.68    | 4.1x10 <sup>-25</sup> | 0.71    | 2.60x10 <sup>-2</sup> | no data                        | no data                | -0.18   | 1.91x10 <sup>-5</sup>      |
| PAK4      | 2 | 0.72    | 3.7x10 <sup>-15</sup> | 1.03    | 0.85 (ns)             | downregulated in tumor samples | 5.67x10 <sup>-16</sup> | 0.12    | 4.92x10 <sup>-3</sup>      |
| PAK7      | 4 | no data | no data               | no data | no data               | no data                        | no data                | no data | no data                    |
| PDGFRA    | 2 | 0.19    | 1.8x10 <sup>-36</sup> | 1.31    | 0.08 (ns)             | no data                        | no data                | 0.27    | 1.13x10 <sup>-10</sup>     |
| PDPK1     | 2 | 0.74    | 1.9x10 <sup>-14</sup> | 0.43    | 9.4x10 <sup>-8</sup>  | upregulated in tumor samples   | 4.88x10 <sup>-6</sup>  | -0.18   | 2.73x10 <sup>-5</sup>      |
| PIAS3     | 2 | 1.22    | 9.10x10 <sup>-4</sup> | 1.20    | 0.24 (ns)             | no data                        | no data                | 0.45    | 9.21x10 <sup>-28</sup>     |
| PIK3R3    | 2 | 1.46    | 3.20x10 <sup>-4</sup> | 0.44    | 2.9x10 <sup>-7</sup>  | no data                        | no data                | 0.12    | 5.11x10 <sup>-3</sup>      |

|         |   |      |                       |      |                       |                                |                        |       |                            |
|---------|---|------|-----------------------|------|-----------------------|--------------------------------|------------------------|-------|----------------------------|
| PIP4K2B | 4 | 1.13 | $1.50 \times 10^{-2}$ | 0.50 | 0.14 (ns)             | upregulated in tumor samples   | $2.06 \times 10^{-6}$  | 0.39  | $3.74 \times 10^{-21}$     |
| PLD1    | 2 | 1.26 | $9.3 \times 10^{-7}$  | 0.71 | $2.80 \times 10^{-2}$ | upregulated in tumor samples   | $3.66 \times 10^{-24}$ | 0.08  | $7.46 \times 10^{-2}$      |
| PRKCA   | 2 | 0.44 | $1.5 \times 10^{-36}$ | 1.00 | 0.99 (ns)             | downregulated in tumor samples | $2.7 \times 10^{-39}$  | 0.02  | $7.11 \times 10^{-1}$ (ns) |
| PPM1B   | 2 | 0.65 | $5.5 \times 10^{-33}$ | 0.87 | 0.38 (ns)             | downregulated in tumor samples | $8.55 \times 10^{-25}$ | -0.16 | $2.79 \times 10^{-4}$      |
| PPP1CB  | 2 | 0.83 | $2.2 \times 10^{-6}$  | 0.63 | $2.90 \times 10^{-3}$ | downregulated in tumor samples | $7.32 \times 10^{-14}$ | 0.10  | $1.68 \times 10^{-2}$      |
| PPP3R1  | 3 | 1.21 | $3.6 \times 10^{-7}$  | 0.85 | 0.29 (ns)             | upregulated in tumor samples   | $5.19 \times 10^{-12}$ | 0.33  | $9.08 \times 10^{-15}$     |
| PTEN    | 2 | 1.06 | 0.71                  | 0.62 | $2.20 \times 10^{-3}$ | downregulated in tumor samples | $1.14 \times 10^{-24}$ | 0.04  | $3.12 \times 10^{-1}$ (ns) |
| RALA    | 2 | 1.28 | $1.8 \times 10^{-6}$  | 0.69 | $1.50 \times 10^{-2}$ | no changes                     | $1.88 \times 10^{-1}$  | -0.08 | $7.64 \times 10^{-2}$      |
| RAP1B   | 3 | 1.18 | $5.9 \times 10^{-5}$  | 1.05 | 0.76 (ns)             | downregulated in tumor samples | $1.65 \times 10^{-13}$ | 0.02  | $7.25 \times 10^{-1}$ (ns) |
| RAPGEF2 | 2 | 1.27 | $2.50 \times 10^{-2}$ | 0.44 | $4.4 \times 10^{-7}$  | upregulated in tumor samples   | $3.77 \times 10^{-61}$ | -0.09 | $4.50 \times 10^{-2}$      |
| RASSF1  | 2 | 1.58 | $1.0 \times 10^{-18}$ | 1.29 | 0.096 (ns)            | no data                        | no data                | 0.36  | $1.57 \times 10^{-17}$     |
| RPS6KA3 | 3 | 0.99 | 0.14                  | 0.63 | $3.00 \times 10^{-3}$ | downregulated in tumor samples | $3.63 \times 10^{-3}$  | -0.03 | $4.39 \times 10^{-1}$ (ns) |
| RPS6KB1 | 3 | 1.27 | $3.5 \times 10^{-10}$ | 1.18 | 0.27 (ns)             | upregulated in tumor samples   | $8.88 \times 10^{-36}$ | 0.11  | $1.13 \times 10^{-2}$      |
| RUNX1   | 3 | 3.36 | $1.8 \times 10^{-40}$ | 2.07 | $3.30 \times 10^{-6}$ | upregulated in tumor samples   | $1.01 \times 10^{-29}$ | 0.50  | $2.80 \times 10^{-35}$     |
| SMAD1   | 2 | 0.77 | $2.1 \times 10^{-7}$  | 0.76 | $7.40 \times 10^{-2}$ | no data                        | no data                | 0.15  | $4.97 \times 10^{-4}$      |
| SMAD2   | 2 | 0.85 | $1.5 \times 10^{-7}$  | 0.58 | $4.30 \times 10^{-4}$ | downregulated in tumor samples | $3.59 \times 10^{-18}$ | -0.06 | $1.97 \times 10^{-1}$ (ns) |
| SMAD7   | 2 | 0.97 | 0.13                  | 0.87 | 0.35 (ns)             | no data                        | no data                | 0.35  | $1.34 \times 10^{-16}$     |
| SP1     | 4 | 1.19 | $3.70 \times 10^{-4}$ | 0.63 | $2.90 \times 10^{-3}$ | downregulated in tumor samples | $9.3 \times 10^{-3}$   | 0.11  | $1.49 \times 10^{-2}$      |
| SRF     | 3 | 0.99 | 0.72                  | 0.95 | 0.73 (ns)             | upregulated in tumor samples   | $1.09 \times 10^{-13}$ | 0.29  | $1.95 \times 10^{-11}$     |
| SSH2    | 3 | 1.28 | $4.80 \times 10^{-4}$ | 0.81 | 0.19 (ns)             | upregulated in tumor samples   | $1.91 \times 10^{-11}$ | 0.05  | $2.16 \times 10^{-1}$ (ns) |
| STAT3   | 3 | 0.79 | $3.1 \times 10^{-9}$  | 0.93 | 0.64 (ns)             | no changes                     | $3.86 \times 10^{-1}$  | 0.42  | $1.00 \times 10^{-23}$     |

|         |   |      |                       |      |                       |                                |                        |       |                            |
|---------|---|------|-----------------------|------|-----------------------|--------------------------------|------------------------|-------|----------------------------|
| TGFB1   | 2 | 0.89 | 6.60x10 <sup>-2</sup> | 0.74 | 0.052 (ns)            | upregulated in tumor samples   | 2.49x10 <sup>-24</sup> | -0.04 | 3.18x10 <sup>-1</sup> (ns) |
| TMSB4Y  | 2 | 0.33 | 2.0x10 <sup>-6</sup>  | 0.82 | 0.2 (ns)              | no data                        | no data                | 0.02  | 6.66x10 <sup>-1</sup> (ns) |
| TNF     | 2 | 1.36 | 0.37                  | 1.10 | 0.52 (ns)             | no data                        | no data                | 0.18  | 3.41x10 <sup>-5</sup>      |
| VAV3    | 2 | 0.38 | 3.1x10 <sup>-36</sup> | 0.46 | 1.2x10 <sup>-6</sup>  | upregulated in tumor samples   | 1.89x10 <sup>-10</sup> | -0.24 | 2.66x10 <sup>-8</sup>      |
| WASF1   | 2 | 1.55 | 1.1x10 <sup>-11</sup> | 0.92 | 0.6 (ns)              | downregulated in tumor samples | 2.26x10 <sup>-9</sup>  | 0.17  | 7.58x10 <sup>-5</sup>      |
| WASL    | 2 | 0.72 | 9.8x10 <sup>-18</sup> | 0.47 | 9.9x10 <sup>-7</sup>  | downregulated in tumor samples | 6.04x10 <sup>-26</sup> | -0.29 | 5.78x10 <sup>-12</sup>     |
| XIAP    | 2 | 0.73 | 9.0x10 <sup>-19</sup> | 0.62 | 2.00x10 <sup>-3</sup> | no changes                     | 8.55x10 <sup>-1</sup>  | -0.09 | 4.91x10 <sup>-2</sup>      |
| ZFYVE16 | 2 | 0.77 | 6.3x10 <sup>-9</sup>  | 0.71 | 2.70x10 <sup>-2</sup> | upregulated in tumor samples   | 1.93x10 <sup>-4</sup>  | -0.03 | 5.17x10 <sup>-1</sup> (ns) |

**TCGA Encori mRNA** - Genes expression (mRNA level), data from Encori bioinformatic program

**Encori survival** - HR and p value, the potential influence of listed genes on survival of ccRCC patients, data from Encori bioinformatic program

**CPTAC Ualcan protein** - Changes of listed proteins in ccRCC patients, data from Ualcan bioinformatic program

**TGFB1 vs gene coexpression Encori** - Correlation between TGFB1 expression and expression of listed Genes

|  |                                                   |
|--|---------------------------------------------------|
|  | genes selected for analysis                       |
|  | p values < 0.05 (Encori mRNA)                     |
|  | p values < 0.05 (Encori survival)                 |
|  | p values < 0.05 (Ualcan protein)                  |
|  | p values < 0.05 , TGF vs genes corelation, Encori |
